# Supplementary material for: A Cross-Sectional Study to Assess Knowledge of COVID-19 among Undergraduate Students in North-Central Ecuador
Source: Int J Environ Res Public Health. 2021 Aug 18;18(16):8706. doi: 10.3390/ijerph18168706 (PMC8391163; doi:10.3390/ijerph18168706)
Supplement: Supplementary file 1 [file ijerph-18-08706-s001.zip › Ortegar-Paredes et al2021.Table S1.xlsx]

## Sheet: English version
	Questions	Options
	Section 1. Demographics
	Gender	Masculine	Femenine	Other
	Program of study	Science related	Non-science related
	Educational level	1-3th	4-6th	7-9th	10th or higher semester
	Section 2. Symptoms
1	Unlike the common cold, stuffy nose, runny nose, and sneezing are less common in persons infected with the COVID-19 virus.	TRUE	FALSE	Not sure
2	The main clinical symptoms of COVID-19 are fever, fatigue, dry cough, and body aches.	TRUE	FALSE	Not sure
3	Not all persons with COVID-2019 will develop to severe cases. Only those who are elderly and have chronic illnesses are more likely to be severe cases.	TRUE	FALSE	Not sure
	Section 3. Detection
4	PCR is the most accurate technique for identifying the virus in a patient	TRUE	FALSE	Not sure
5	The rapid test is the most accurate technique for identifying the virus in a patient	TRUE	FALSE	Not sure
	Section 4. Treatments
6	There currently is no effective cure for COVID-19, but early symptomatic and supportive treatment can help most patients recover from the infection	TRUE	FALSE	Not sure
7	Chlorine dioxide is considered safe to use to combat COVID-19	TRUE	FALSE	Not sure
8	Some natural alternatives like honey, garlic, ginger, eucalyptus, etc. They can be used to fight the virus	TRUE	FALSE	Not sure
	Section 5. Transmission
9	Eating or touching wild animals would result in the infection by the COVID-19 virus.	TRUE	FALSE	Not sure
10	Persons with COVID-19 cannot infect the virus to others if they do not have a fever.	TRUE	FALSE	Not sure
11	The COVID-19 virus spreads via respiratory droplets of infected individuals.	TRUE	FALSE	Not sure
12	People can be infected and contagious despite having no clear symptoms of the disease	TRUE	FALSE	Not sure
13	The COVID-19 virus is airborne.	TRUE	FALSE	Not sure
14	Officially, dogs and cats are considered low risk for the transmission of the virus that causes COVID-19	TRUE	FALSE	Not sure
	Section 6. Prevention	TRUE	FALSE	Not sure
15	To prevent the infection by COVID-19, individuals should avoid going to crowded places and avoid taking public transportations.	TRUE	FALSE	Not sure
16	Isolation and treatment of people who are infected with the COVID-19 virus are effective ways to reduce the spread of the virus.	TRUE	FALSE	Not sure
17	It is not necessary for children and young adults to take measures to prevent the infection by the COVID-19 virus.	TRUE	FALSE	Not sure
18	People who have contact with someone infected with the COVID-19 virus should be immediately isolated in a proper place. In general, the isolation period is 14 days.	TRUE	FALSE	Not sure
19	The use of gloves provides total security against contagion with COVID-19	TRUE	FALSE	Not sure
20	Ordinary residents can wear face masks to prevent the infection by the COVID-19 virus.	TRUE	FALSE	Not sure
21	It is okay to return to the workplace without taking a COVID-19 test.	TRUE	FALSE	Not sure
22	People who work in public service should wear protective screens to prevent infection by the virus that causes COVID-19	TRUE	FALSE	Not sure
	Section 7. Knowledge of the virus
23	The coronavirus can be seen with a common microscope	TRUE	FALSE	Not sure
24	The causative agent of COVID-19 is an RNA virus	TRUE	FALSE	Not sure
	Multiple option
25	The virus causing COVID-19 is called:	SARS-COV-2	COVID-19	MERS-19	Not sure
26	The virus causing COVID-19:	Was created in a laboratory	Is of natural origin	Not sure
27	The virus causing COVID-19 is:	An entity capable of adapting and evolving	Not sure	A chemical compound	A living entity	A mediatic complot
28	Out of every 100 individuals infected with COVID-19 in ECUADOR, the number of people dying from this cause is between	1-10-	11-20-	51 - 100	21 - 30	41 - 50	31 - 40	Not sure
	Comments
	In this section you can share with us any comments, suggestions or recommendations concernig the survey or study.

## Sheet: Spanish version
	Questions	Options
	Sección 1. Datos demográficos
	Género	Masculino	Femenino	Otro
	Programa de estudio	Relacionado a ciencias	No relacionado a ciencias
	Nivel educativo	1-3th	4-6th	7-9th	10th o mayor
	Sección 2. Síntomas
1	A diferencia del resfriado común, la nariz tapada, la nariz que moquea y los estornudos son menos comunes en personas infectadas por el virus que causa COVID-19	Verdadero	Falso	No estoy seguro/a
2	Los principales síntomas clínicos de COVID-19 son fiebre, fatiga, tos seca y dolores corporales	Verdadero	Falso	No estoy seguro/a
3	No todas las personas con COVID-19 desarrollarán casos graves. Pero ancianos y personas con enfermedades cr√≥nicas tienen más probabilidades de ser casos graves	Verdadero	Falso	No estoy seguro/a
	Sección 3. Detección
4	La PCR es la técnica más precisa para identificar el virus en un paciente	Verdadero	Falso	No estoy seguro/a
5	La prueba rápida es latécnica más precisa para identificar el virus en un paciente	Verdadero	Falso	No estoy seguro/a
	Sección 4. Tratamientos
6	Actualmente no existe una cura efectiva para COVID-19, pero el tratamiento sintomático y de apoyo temprano puede ayudar a la mayor√≠a de los pacientes a recuperarse de la infección	Verdadero	Falso	No estoy seguro/a
7	Se considera seguro el uso de dióxido de cloro para combatir la COVID-19	Verdadero	Falso	No estoy seguro/a
8	Algunas alternativas naturales como la miel, el ajo, el jengibre, el eucalipto, etc. Pueden usarse para combatir el virus	Verdadero	Falso	No estoy seguro/a
	Sección 5. Transmisión
9	Comer o tocar animales salvajes provoca la infecciónn por el virus causante de COVID-19	Verdadero	Falso	No estoy seguro/a
10	Las personas con COVID-19 solo transmiten el virus cuando presentan fiebre	Verdadero	Falso	No estoy seguro/a
11	El virus que causa COVID-19 se propaga a través de micro gotas respiratorias de individuos infectados	Verdadero	Falso	No estoy seguro/a
12	Las personas pueden estar infectadas y ser contagiosas a pesar de no tener síntomas claros de la enfermedad	Verdadero	Falso	No estoy seguro/a
13	El virus que causa COVID-19 se transporta por el aire	Verdadero	Falso	No estoy seguro/a
14	Oficialmente se sonsidera a perros y gatos de bajo riesgo para la trasmisión del virus causante de COVID-19	Verdadero	Falso	No estoy seguro/a
	Sección 6. Prevención
15	Para prevenir el contagio de COVID-19, las personas deben evitar aglomeraciones y evitar el transporte público	Verdadero	Falso	No estoy seguro/a
16	El aislamiento y el tratamiento de personas contagiadas con COVID-19 son formas efectivas de reducir la propagación del virus	Verdadero	Falso	No estoy seguro/a
17	Es necesario que los niños y adultos jóvenes tomen medidas para prevenir la infección por el virus causante de COVID-19	Verdadero	Falso	No estoy seguro/a
18	Las personas que tienen contacto con alguien infectado con el virus deben aislarse inmediatamente en un lugar adecuado. En general, el período de aislamiento es de 14 horas	Verdadero	Falso	No estoy seguro/a
19	El uso de guantes provee de total seguridad frente al contagio con COVID-19	Verdadero	Falso	No estoy seguro/a
20	El uso apropiado de mascarilla reduce la probabilidad de contagio con COVID-19	Verdadero	Falso	No estoy seguro/a
21	Es correcto regresar al lugar de trabajo sin realizarse un prueba de COVID-19.	Verdadero	Falso	No estoy seguro/a
22	Las personas que trabajan en atención al público deben usar pantallas de protección para prevenir la infección por el virus causante de COVID-19	Verdadero	Falso	No estoy seguro/a
	Sección 7. Conocimiento del virus
23	El coronavirus se puede ver con un microscopio común	Verdadero	Falso	No estoy seguro/a
24	El agente causante de COVID-19 es un virus de ARN	Verdadero	Falso	No estoy seguro/a
	Opción multiple
25	La COVID-19 es causada por el virus llamado:	SARS-COV-2	COVID-19	MERS-19	No estoy seguro/a
26	Considera usted que el virus causante de COVID-19 es:	Creado en laboratorio	De origen natural	No estoy seguro/a
27	Considera usted que el virus causante de COVID-19 es:	Una entidad capaz de adaptarse y evolucionar	Un compuesto químico	Una entidad viva	Un complot mediático	No estoy seguro/a
28	De cada 100 infectados con COVID-19 en ECUADOR se estima que la cantidad de personas que fallecen por esta causa, es entre:	1-10-	11-20-	51 - 100	21 - 30	41 - 50	31 - 40	No estoy seguro/a
	Comentarios
	En esta sección usted puede compartir con nosotros cualquier comentario, sugerencia o recomendación respecto a la encuesta o el estudio.
27
