# Supplementary material for: A Cross-Sectional Study to Assess Knowledge of COVID-19 among Undergraduate Students in North-Central Ecuador
Source: Int J Environ Res Public Health. 2021 Aug 18;18(16):8706. doi: 10.3390/ijerph18168706 (PMC8391163; doi:10.3390/ijerph18168706)
Supplement: Supplementary file 1 [file ijerph-18-08706-s001.zip › Ortegar-Paredes et al2021.Table S3.xlsx]

## Sheet: Sheet1
Ciudad de residencia	Ciudad de origen	Edad	Género	Universidad en la que estudia	Carrera que sigue en la Universidad	Nivel que cursa en la Universidad	La COVID-19 es causada por el virus llamado:	Considera usted que el virus causante de COVID-19 es:	Considera usted que el virus causante de COVID-19 es:	De cada 100 infectados con COVID-19 en ECUADOR se estima que la cantidad de personas que fallecen por esta causa, es entre:	A diferencia del resfriado común, la nariz tapada, la nariz que moquea y los estornudos son menos comunes en personas infectadas por el virus que causa COVID-19	Los principales síntomas clínicos de COVID-19 son fiebre, fatiga, tos seca y dolores corporales	Actualmente no existe una cura efectiva para COVID-19, pero el tratamiento sintomático y de apoyo temprano puede ayudar a la mayoría de los pacientes a recuperarse de la infección	No todas las personas con COVID-19 desarrollarán casos graves. Pero ancianos y personas con enfermedades crónicas tienen más probabilidades de ser casos graves	Comer o tocar animales salvajes provoca la infección por el virus causante de COVID-19	Las personas con COVID-19 solo transmiten el virus cuando presentan fiebre	El virus que causa COVID-19 se propaga a través de micro gotas respiratorias de individuos infectados	El virus que causa COVID-19 se transporta por el aire	Las personas que trabajan en atención al público deben usar pantallas de protección para prevenir la infección por el virus causante de COVID-19	Es necesario que los niños y adultos jóvenes tomen medidas para prevenir la infección por el virus causante de COVID-19	Para prevenir el contagio de COVID-19, las personas deben evitar aglomeraciones y evitar el transporte público	El aislamiento y el tratamiento de personas contagiadas con COVID-19 son formas efectivas de reducir la propagación del virus	Las personas que tienen contacto con alguien infectado con el virus deben aislarse inmediatamente en un lugar adecuado. En general, el período de aislamiento es de 14 días	Las personas pueden estar infectadas y ser contagiosas a pesar de no tener síntomas claros de la enfermedad	El coronavirus se puede ver con un microscopio común	El agente causante de COVID-19 es un virus de ARN	La PCR es la técnica más precisa para identificar el virus en un paciente	La prueba rápida es la técnica más precisa para identificar el virus en un paciente	Se considera seguro el uso de dióxido de cloro para combatir la COVID-19	Algunas alternativas naturales como la miel, el ajo, el jengibre, el eucalipto, etc. Pueden usarse para combatir el virus	Oficialmente se considera a perros y gatos de bajo riesgo para la trasmisión del virus causante de COVID-19	Es correcto regresar al lugar de trabajo sin realizarse un prueba de COVID-19.	El uso de guantes provee de total seguridad frente al contagio con COVID-19	El uso apropiado de mascarilla reduce la probabilidad de contagio con COVID-19	En esta sección usted puede compartir con nosotros cualquier comentario, sugerencia o recomendación respecto a la encuesta o el estudio.
		36	Masculino	Profesional	Investigadoe						Verdadero	Verdadero	Verdadero	Verdadero	Falso	Falso	Verdadero	Falso	Verdadero	Verdadero	Verdadero	Verdadero	Verdadero	Verdadero	Falso	Verdadero	Verdadero	Falso		Falso	Verdadero	Falso	Verdadero	Falso
Quito		29	Masculino	Titulo cuarto nivel	Veterinario		SARS-COV-2	De origen natural	Una entidad viva	1 - 10	Verdadero	Verdadero	Verdadero	Verdadero	Falso	Falso	Verdadero	Falso	Verdadero	Verdadero	Verdadero	Verdadero	Verdadero	Verdadero	Falso	Verdadero	Verdadero	Falso		Falso	Verdadero	Falso	Falso	Verdadero
Quito	Quito	27	Femenino	Título tercer nivel	Ingeniera Biotecnologia		SARS-COV-2	De origen natural	Una entidad viva	1 - 10	Falso	Verdadero	Verdadero	Verdadero	Falso	Falso	Verdadero	Falso	Verdadero	Verdadero	Verdadero	Verdadero	Verdadero	Verdadero	Falso	Verdadero	Verdadero	Falso		Falso	Verdadero	Falso	Falso	Verdadero
Quito	Quito	24	Femenino	Estudiante universitario	Estudiante		SARS-COV-2	De origen natural	Una entidad viva	21 - 30	Verdadero	Verdadero	Verdadero	Verdadero	Verdadero	Falso	Verdadero	Falso	Verdadero	Verdadero	Verdadero	Verdadero	Verdadero	Verdadero	No estoy segur@	Falso	Verdadero	Falso		Falso	Verdadero	Falso	Falso	Verdadero
khgkj	hgj	89	Masculino	Colegio	kjgkjh		SARS-COV-2	De origen natural	Un compuesto químico	11 - 20	Verdadero	Falso	Falso	Falso	Falso	Falso	Falso	Verdadero	Falso	Verdadero	Verdadero	Falso	Falso	Falso	Verdadero	Falso	Falso	Falso		Falso	Verdadero	verdadero	Falso	Verdadero	lilij
Quito	Quito	18	Femenino	UCE	Medicina veterinaria y zootecnia	1-3	SARS-COV-2	Creado en laboratorio	No estoy seguro/a	21 - 30	Verdadero	Verdadero	No estoy seguro/a	Verdadero	Falso	Falso	Verdadero	Verdadero	Verdadero	Verdadero	Verdadero	Verdadero	Verdadero	Verdadero	No estoy seguro/a	Falso	Falso	Verdadero	verdadero	Verdadero	Verdadero	Falso	Falso	Verdadero
Sangolquí	Sangolquí	22	Masculino	UCE	Medicina Veterinaria	1-3	SARS-COV-2	De origen natural	Una entidad viva	1 - 10	Falso	Verdadero	Verdadero	Verdadero	No estoy seguro/a	Falso	Verdadero	Verdadero	Verdadero	Verdadero	Verdadero	Verdadero	Verdadero	Verdadero	No estoy seguro/a	Verdadero	No estoy seguro/a	Falso	Falso	Falso	Falso	Falso	Falso	Verdadero
Quito	Quito	19	Masculino	UCE	Medicina veterinaria y zootecnia	1-3	SARS-COV-2	No estoy seguro/a	Una entidad viva	11 - 20	No estoy seguro/a	Verdadero	Verdadero	Verdadero	Falso	Falso	Verdadero	No estoy seguro/a	Verdadero	Verdadero	Verdadero	No estoy seguro/a	Verdadero	Verdadero	No estoy seguro/a	No estoy seguro/a	Verdadero	Falso	No estoy seguro/a	No estoy seguro/a	No estoy seguro/a	Falso	No estoy seguro/a	Verdadero
Quevedo	Quevedo	19	Masculino	UCE	Veterinaria y Zootecnia	1-3	SARS-COV-2	Creado en laboratorio	No estoy seguro/a	1 - 10	No estoy seguro/a	Verdadero	Verdadero	Verdadero	No estoy seguro/a	Falso	Verdadero	Falso	Verdadero	Verdadero	Verdadero	Verdadero	Verdadero	Verdadero	No estoy seguro/a	No estoy seguro/a	Verdadero	Falso	Falso	No estoy seguro/a	Falso	Falso	Verdadero	Verdadero
Quito	Quito	19	Femenino	UCE	Medicina Veterinaria y Zootecnia	1-3	SARS-COV-2	Creado en laboratorio	No estoy seguro/a	11 - 20	No estoy seguro/a	Verdadero	Verdadero	Verdadero	No estoy seguro/a	Falso	Verdadero	Falso	Verdadero	Verdadero	Verdadero	Verdadero	Verdadero	Verdadero	No estoy seguro/a	Falso	Verdadero	Verdadero	No estoy seguro/a	Verdadero	Verdadero	Falso	Verdadero	Verdadero
Quito	Quito	24	Femenino	UCE	Medicina Veterinaria	1-3	SARS-COV-2	Creado en laboratorio	Un compuesto químico	1 - 10	Verdadero	Verdadero	Verdadero	Verdadero	No estoy seguro/a	Falso	Verdadero	No estoy seguro/a	Verdadero	Verdadero	Verdadero	Verdadero	Verdadero	Verdadero	No estoy seguro/a	Verdadero	Falso	Falso	Falso	Verdadero	Verdadero	Falso	Falso	Verdadero	Enviar las respuestas correctas si es posible
Ambato	Ambato	19	Femenino	UCE	Medicina Veterninaria	1-3	SARS-COV-2	De origen natural	No estoy seguro/a	21 - 30	Verdadero	Verdadero	Verdadero	Verdadero	Falso	Falso	Verdadero	Falso	Verdadero	Verdadero	Verdadero	Verdadero	Verdadero	Verdadero	Verdadero	No estoy seguro/a	Verdadero	Falso	Falso	Falso	Falso	Falso	Falso	Verdadero
Quito	Quito	22	Femenino	UCE	Medicina veterinaria	1-3	SARS-COV-2	De origen natural	Una entidad viva	1 - 10	No estoy seguro/a	Verdadero	Verdadero	Verdadero	Falso	Falso	Verdadero	Falso	Verdadero	Verdadero	Verdadero	Verdadero	Verdadero	Verdadero	No estoy seguro/a	Verdadero	No estoy seguro/a	Falso	Falso	Verdadero	Verdadero	Falso	Falso	Verdadero
Cayambe	Guayaquil	18	Femenino	UCE	Veterinaria	1-3	No estoy seguro/a	Creado en laboratorio	No estoy seguro/a	No estoy seguro/a	No estoy seguro/a	Verdadero	Verdadero	Verdadero	Falso	Falso	Falso	Verdadero	Verdadero	Verdadero	Verdadero	Falso	Falso	Verdadero	No estoy seguro/a	No estoy seguro/a	Verdadero	Falso	verdadero	Verdadero	Falso	Falso	Falso	Verdadero	excelente encuesta
Latacunga	Latacunga	18	Femenino	UCE	Medicina Veterinaria y Zootecnia	1-3	SARS-COV-2	De origen natural	Un compuesto químico	31 - 40	No estoy seguro/a	Verdadero	Verdadero	Verdadero	Verdadero	No estoy seguro/a	Verdadero	Verdadero	Verdadero	Verdadero	Verdadero	Verdadero	Verdadero	Verdadero	No estoy seguro/a	No estoy seguro/a	Verdadero	Falso	Falso	Falso	Verdadero	Falso	Falso	Verdadero
Quito	Quito	20	Femenino	UCE	Medicina Veterinaria	1-3	SARS-COV-2	Creado en laboratorio	Una entidad viva	No estoy seguro/a	No estoy seguro/a	Verdadero	Verdadero	Verdadero	No estoy seguro/a	Falso	Verdadero	Falso	Verdadero	Verdadero	Verdadero	Verdadero	Verdadero	Verdadero	Verdadero	Verdadero	Verdadero	Verdadero	Falso	Verdadero	Verdadero	Falso	Falso	Verdadero
Cascales	Cascales	19	Femenino	UCE	Medicina Veterinaria y Zootecnia	1-3	SARS-COV-2	De origen natural	Una entidad viva	No estoy seguro/a	Falso	Verdadero	Verdadero	Verdadero	Falso	Falso	Verdadero	Verdadero	Verdadero	Verdadero	Verdadero	Verdadero	Verdadero	Verdadero	No estoy seguro/a	Verdadero	Verdadero	Falso	Falso	Verdadero	Verdadero	Falso	Falso	Verdadero	Excelente cuestionario!
Quito	Quito	22	Femenino	UCE	Medicina Veterinaria y Zootecnia	1-3	SARS-COV-2	Creado en laboratorio	Una entidad viva	1 - 10	Verdadero	Verdadero	Verdadero	Verdadero	Falso	Falso	Verdadero	Falso	Verdadero	Verdadero	Verdadero	Verdadero	Verdadero	Verdadero	Falso	Falso	Falso	Falso	Falso	Verdadero	Verdadero	Falso	Falso	Verdadero
Parroquia anconcito	Salinas	17	Masculino	UCE	Medicina Veterinaria	1-3	SARS-COV-2	Creado en laboratorio	No estoy seguro/a	41 - 50	Verdadero	Verdadero	Verdadero	Verdadero	Falso	Falso	Verdadero	Verdadero	Verdadero	Verdadero	Verdadero	Verdadero	Verdadero	Verdadero	Falso	No estoy seguro/a	No estoy seguro/a	Falso	Falso	Verdadero	Verdadero	Falso	Falso	Verdadero
Sangolqui	Quito	19	Femenino	UCE	Medicina Veterinaria y Zootecnia	1-3	SARS-COV-2	De origen natural	Una entidad viva	41 - 50	Verdadero	Verdadero	Verdadero	Verdadero	No estoy seguro/a	Falso	Verdadero	Verdadero	Verdadero	Verdadero	Verdadero	Verdadero	Verdadero	Verdadero	Falso	Falso	Falso	Falso	Falso	Falso	Verdadero	Falso	Falso	Verdadero
Santo Domingo Ecuador	Santo Domingo	18	Femenino	UCE	Medicina Veterinaria y Zootecnia	1-3	COVID-19	De origen natural	No estoy seguro/a	41 - 50	Verdadero	Verdadero	Verdadero	Verdadero	Falso	Falso	Verdadero	Verdadero	Verdadero	Verdadero	Verdadero	Verdadero	Verdadero	Verdadero	No estoy seguro/a	No estoy seguro/a	No estoy seguro/a	Verdadero	No estoy seguro/a	Verdadero	Verdadero	verdadero	Falso	Verdadero
huaquillas	huaquillas	17	Femenino	UCE	medicina veterinaria	1-3	No estoy seguro/a	De origen natural	Una entidad viva	31 - 40	Falso	Verdadero	Verdadero	Verdadero	Falso	Falso	Verdadero	Verdadero	Verdadero	Verdadero	Verdadero	Verdadero	Verdadero	Verdadero	Falso	No estoy seguro/a	No estoy seguro/a	Verdadero	No estoy seguro/a	Verdadero	Verdadero	Falso	Falso	Verdadero
Quito	Quito	19	Femenino	UCE	Medicina Veterinaria	1-3	No estoy seguro/a	No estoy seguro/a	No estoy seguro/a	51 - 100	Verdadero	Verdadero	Verdadero	Verdadero	Falso	Falso	Verdadero	Falso	Verdadero	Verdadero	Verdadero	Verdadero	Verdadero	Verdadero	No estoy seguro/a	Falso	Verdadero	Falso	No estoy seguro/a	Falso	Verdadero	Falso	Falso	Verdadero
Quinindé	Quinindé	17	Femenino	UCE	Medicina veterinaria	1-3	COVID-19	No estoy seguro/a	No estoy seguro/a	No estoy seguro/a	Verdadero	Verdadero	Verdadero	Verdadero	No estoy seguro/a	Falso	Verdadero	Verdadero	Verdadero	Verdadero	Verdadero	Verdadero	Verdadero	Verdadero	Verdadero	No estoy seguro/a	Falso	Falso	verdadero	Verdadero	Verdadero	Falso	Falso	Verdadero
Canton Santa Rosa	Lagoagrio	18	Femenino	UCE	Medicina Veterinaria y Zootecnia	1-3	SARS-COV-2	Creado en laboratorio	Un compuesto químico	11 - 20	Verdadero	Verdadero	Verdadero	Verdadero	Falso	Falso	Verdadero	Verdadero	Verdadero	Verdadero	Verdadero	Verdadero	Verdadero	Verdadero	Verdadero	Verdadero	Verdadero	Verdadero	No estoy seguro/a	No estoy seguro/a	No estoy seguro/a	No estoy seguro/a	Verdadero	Verdadero
Cotopaxi-Ecuador	Cotopaxi-Ecuador	19	Femenino	UCE	Medicina Veterinaria y Zootecnia	1-3	SARS-COV-2	Creado en laboratorio	Un compuesto químico	21 - 30	Falso	Verdadero	Verdadero	Verdadero	Falso	Falso	Verdadero	Falso	Verdadero	Verdadero	Verdadero	Verdadero	Verdadero	Verdadero	No estoy seguro/a	No estoy seguro/a	Verdadero	Falso	No estoy seguro/a	Verdadero	Verdadero	Falso	Falso	Verdadero	Recomiedo mantener una actitud positiva frente a esta situacion que estamos viviendo
Ibarra	Ibarra	18	Femenino	UCE	Medicina veterinaria y zootecnia	1-3	No estoy seguro/a	Creado en laboratorio	No estoy seguro/a	No estoy seguro/a	Verdadero	Verdadero	Verdadero	Verdadero	Falso	Falso	Verdadero	Falso	Verdadero	Verdadero	Verdadero	Verdadero	Verdadero	Verdadero	No estoy seguro/a	No estoy seguro/a	No estoy seguro/a	No estoy seguro/a	Falso	No estoy seguro/a	Verdadero	Falso	Falso	Verdadero
Latacunga	Quito	19	Masculino	UCE	Medicina Veterinaria	1-3	SARS-COV-2	Creado en laboratorio	No estoy seguro/a	No estoy seguro/a	Verdadero	Verdadero	Verdadero	Verdadero	Verdadero	Verdadero	Verdadero	No estoy seguro/a	Verdadero	Verdadero	Verdadero	Verdadero	Falso	Verdadero	No estoy seguro/a	No estoy seguro/a	Verdadero	No estoy seguro/a	No estoy seguro/a	Verdadero	Verdadero	Falso	Falso	Verdadero
Parroquia de Tambillo	Parroquia de Tambillo	19	Masculino	UCE	Medicina Veterinaria y Zootecnica	1-3	No estoy seguro/a	De origen natural	Una entidad viva	51 - 100	Falso	No estoy seguro/a	Verdadero	Verdadero	Falso	Falso	Verdadero	Verdadero	Verdadero	Verdadero	Verdadero	Verdadero	Verdadero	Falso	Falso	Falso	Verdadero	Falso	verdadero	Verdadero	Falso	Falso	Falso	Verdadero	Me gusto el cuestionario
SANTO DOMINGO	SANTO DOMINGO	18	Femenino	UCE	MEDICINA VETERINARIA	1-3	SARS-COV-2	Creado en laboratorio	Un complot mediático	No estoy seguro/a	Falso	Verdadero	Verdadero	Verdadero	Falso	Falso	Verdadero	Verdadero	Verdadero	Verdadero	Verdadero	Verdadero	Verdadero	Verdadero	Falso	Verdadero	Falso	Verdadero	verdadero	Verdadero	Verdadero	Falso	Falso	Verdadero
Tumbaco	Quito	19	Masculino	UCE	Medicina Veterinaria y Zootecnia	1-3	SARS-COV-2	De origen natural	No estoy seguro/a	1 - 10	Verdadero	Verdadero	Verdadero	Verdadero	Falso	Falso	Verdadero	Falso	Verdadero	Verdadero	Verdadero	Verdadero	Verdadero	Verdadero	No estoy seguro/a	Falso	Verdadero	Verdadero	Falso	Falso	Verdadero	verdadero	Verdadero	Verdadero	Es una encuesta excelente para tener presente por la actual pandemia que esta pasando alrededor del mundo, aparte de conocer los aspectos que pueden interferir al momento de tomar las debidas precauciones para no infectarse y también los cuidados que debe recibir una persona que esta infectado.
Quito	Quito	19	Masculino	UCE	Medicina veterinaria y zootecnia	1-3	COVID-19	De origen natural	Una entidad viva	31 - 40	Verdadero	Verdadero	Verdadero	Verdadero	Falso	Falso	Verdadero	Falso	Verdadero	No estoy seguro/a	Verdadero	Verdadero	Verdadero	Verdadero	Verdadero	Verdadero	No estoy seguro/a	Falso	verdadero	No estoy seguro/a	Verdadero	Falso	Verdadero	Verdadero
latacunga	latacunga	24	Masculino	UCE	veterinaria	1-3	No estoy seguro/a	Creado en laboratorio	Un complot mediático	51 - 100	No estoy seguro/a	Verdadero	Verdadero	Verdadero	Falso	No estoy seguro/a	No estoy seguro/a	Falso	Verdadero	Verdadero	Verdadero	Verdadero	Verdadero	Verdadero	Falso	Verdadero	No estoy seguro/a	Falso	Falso	Verdadero	Verdadero	Falso	No estoy seguro/a	Verdadero	me parecio muy buena la encuesta.
Quito	Quito	18	Femenino	UCE	Medicina Veterinaria	1-3	SARS-COV-2	Creado en laboratorio	No estoy seguro/a	No estoy seguro/a	No estoy seguro/a	Verdadero	Verdadero	Verdadero	Falso	Falso	Verdadero	Verdadero	Verdadero	Verdadero	Verdadero	Verdadero	Verdadero	Verdadero	No estoy seguro/a	No estoy seguro/a	No estoy seguro/a	Verdadero	No estoy seguro/a	Verdadero	Falso	Falso	No estoy seguro/a	Verdadero
Quito	Quito	18	Masculino	UCE	Medicina veterinaria y zootecnia	1-3	SARS-COV-2	De origen natural	Una entidad viva	11 - 20	No estoy seguro/a	Verdadero	Verdadero	Verdadero	Verdadero	Falso	Verdadero	No estoy seguro/a	Verdadero	Verdadero	Verdadero	Verdadero	Verdadero	Verdadero	Verdadero	Verdadero	Verdadero	Falso	Falso	Falso	Verdadero	Falso	Falso	Verdadero
Quito	Quito	18	Femenino	UCE	Medicina Veterinaria y Zootecnia	1-3	SARS-COV-2	De origen natural	Una entidad viva	11 - 20	Verdadero	Verdadero	Verdadero	Verdadero	Falso	Falso	Verdadero	No estoy seguro/a	Verdadero	Verdadero	Verdadero	Verdadero	Verdadero	Verdadero	No estoy seguro/a	No estoy seguro/a	Verdadero	Falso	No estoy seguro/a	Falso	No estoy seguro/a	Falso	Falso	Verdadero
Quito	Quito	21	Femenino	UCE	Medicina Veterinaria	1-3	SARS-COV-2	De origen natural	Una entidad viva	11 - 20	Verdadero	Verdadero	Verdadero	Verdadero	Falso	Falso	Verdadero	No estoy seguro/a	Verdadero	Verdadero	Verdadero	Verdadero	Verdadero	Verdadero	No estoy seguro/a	Verdadero	Verdadero	Falso	Falso	Falso	Verdadero	Falso	Falso	Verdadero
Quito	Quito	20	Femenino	UCE	Nivelación Medicina Veterinaria y Zootecnia	1-3	SARS-COV-2	No estoy seguro/a	Una entidad viva	51 - 100	Verdadero	Verdadero	No estoy seguro/a	Verdadero	Verdadero	Falso	Verdadero	No estoy seguro/a	Verdadero	Verdadero	Verdadero	Verdadero	Verdadero	Verdadero	Falso	Verdadero	Verdadero	Falso	Falso	No estoy seguro/a	No estoy seguro/a	Falso	Falso	Verdadero	Muy buena encuesta. Quisiera a través de la misma saber más del COVID-19
Quito	Quito	21	Masculino	UCE	Medicina Veterinaria	1-3	SARS-COV-2	De origen natural	No estoy seguro/a	No estoy seguro/a	Falso	Verdadero	Verdadero	Verdadero	Verdadero	Falso	Verdadero	Falso	Verdadero	No estoy seguro/a	Verdadero	Verdadero	Verdadero	Verdadero	Verdadero	No estoy seguro/a	Verdadero	Falso	Falso	No estoy seguro/a	Verdadero	Falso	Falso	Verdadero
Quito	Quito	20	Femenino	UCE	Medicina veterinaria	1-3	No estoy seguro/a	De origen natural	Una entidad viva	41 - 50	Verdadero	Verdadero	Verdadero	Verdadero	No estoy seguro/a	Falso	Verdadero	No estoy seguro/a	Verdadero	Verdadero	Verdadero	Verdadero	Verdadero	Verdadero	No estoy seguro/a	No estoy seguro/a	Verdadero	Falso	Falso	Verdadero	Verdadero	Falso	Falso	Verdadero
Ibarra	Ibarra	19	Femenino	UCE	Veterinaria y zootecnia	1-3	COVID-19	No estoy seguro/a	No estoy seguro/a	21 - 30	Verdadero	Verdadero	Verdadero	Verdadero	Falso	Falso	Verdadero	No estoy seguro/a	Verdadero	Verdadero	Verdadero	Verdadero	No estoy seguro/a	Verdadero	No estoy seguro/a	No estoy seguro/a	Verdadero	No estoy seguro/a	No estoy seguro/a	No estoy seguro/a	Verdadero	No estoy seguro/a	Falso	No estoy seguro/a
QUITO	QUITO	19	Femenino	UCE	MEDICINA VETERINARIA	1-3	SARS-COV-2	De origen natural	Una entidad viva	11 - 20	Verdadero	Verdadero	Verdadero	Verdadero	Falso	Falso	Verdadero	No estoy seguro/a	Verdadero	Verdadero	Verdadero	Verdadero	Verdadero	Verdadero	No estoy seguro/a	Verdadero	Verdadero	Verdadero	Falso	No estoy seguro/a	Verdadero	Falso	Falso	Verdadero
Quito	Quito	20	Masculino	UCE	Medicina Veterinaria	1-3	SARS-COV-2	Creado en laboratorio	Un complot mediático	11 - 20	No estoy seguro/a	Verdadero	No estoy seguro/a	Verdadero	No estoy seguro/a	Falso	No estoy seguro/a	Verdadero	Verdadero	Verdadero	Verdadero	Verdadero	Verdadero	Verdadero	Falso	No estoy seguro/a	Falso	Falso	No estoy seguro/a	No estoy seguro/a	Verdadero	Falso	No estoy seguro/a	Verdadero
Quito	Quito	18	Femenino	UCE	Veterinaria	1-3	SARS-COV-2	Creado en laboratorio	Un compuesto químico	11 - 20	Verdadero	Verdadero	Verdadero	Verdadero	No estoy seguro/a	Falso	Verdadero	Falso	Verdadero	Verdadero	Verdadero	Verdadero	Verdadero	Verdadero	No estoy seguro/a	Verdadero	Verdadero	Falso	No estoy seguro/a	No estoy seguro/a	Verdadero	Falso	Falso	Verdadero
Quito	Quito	23	Masculino	UCE	Veterinaria	1-3	SARS-COV-2	De origen natural	No estoy seguro/a	1 - 10	No estoy seguro/a	Verdadero	Falso	Verdadero	Falso	Falso	Verdadero	No estoy seguro/a	Verdadero	Verdadero	Verdadero	Verdadero	Falso	Verdadero	No estoy seguro/a	No estoy seguro/a	Verdadero	Falso	Falso	Verdadero	Verdadero	Falso	Falso	Verdadero
Latacunga	Latacunga	21	Masculino	UCE	Medicina veterinaria	1-3	SARS-COV-2	Creado en laboratorio	Una entidad viva	1 - 10	Falso	Verdadero	Verdadero	Verdadero	Falso	Falso	Verdadero	Falso	Verdadero	Verdadero	Verdadero	Verdadero	Verdadero	Verdadero	Falso	Verdadero	Verdadero	Falso	Falso	Verdadero	Verdadero	Falso	Falso	Verdadero
Santo Domingo	Santo Domingo	19	Femenino	UCE	Medicina Veterinaria y Zootecnia	1-3	No estoy seguro/a	Creado en laboratorio	Un complot mediático	1 - 10	Verdadero	Verdadero	Verdadero	Verdadero	Falso	Falso	No estoy seguro/a	No estoy seguro/a	Verdadero	Verdadero	Verdadero	Verdadero	Verdadero	Verdadero	No estoy seguro/a	No estoy seguro/a	No estoy seguro/a	Falso	verdadero	Verdadero	Verdadero	Falso	Falso	Verdadero
Santo Domingo	Santo Domingo	19	Femenino	UCE	Medicina Veterinaria	1-3	SARS-COV-2	De origen natural	Una entidad viva	11 - 20	Verdadero	Falso	Verdadero	Verdadero	Falso	Falso	Verdadero	Verdadero	Verdadero	Verdadero	Verdadero	Verdadero	Verdadero	Verdadero	Verdadero	No estoy seguro/a	Verdadero	Falso	Falso	No estoy seguro/a	Falso	Falso	Falso	Verdadero
santa elena	santa elena	18	Masculino	UCE	zootecnia y veterinaria	1-3	No estoy seguro/a	Creado en laboratorio	No estoy seguro/a	41 - 50	No estoy seguro/a	Verdadero	No estoy seguro/a	Verdadero	Falso	No estoy seguro/a	Verdadero	No estoy seguro/a	Verdadero	Verdadero	Verdadero	No estoy seguro/a	No estoy seguro/a	Verdadero	No estoy seguro/a	No estoy seguro/a	No estoy seguro/a	Falso	No estoy seguro/a	No estoy seguro/a	No estoy seguro/a	No estoy seguro/a	No estoy seguro/a	Verdadero	menos preguntas con selecion múltiple
Pedro Vicente Maldonado	Pedro Vicente Maldonado	19	Femenino	UCE	Medicina veterinaria y Zootecnia	1-3	COVID-19	No estoy seguro/a	No estoy seguro/a	No estoy seguro/a	Verdadero	Verdadero	No estoy seguro/a	Verdadero	Falso	No estoy seguro/a	No estoy seguro/a	Verdadero	Verdadero	Verdadero	Verdadero	Verdadero	No estoy seguro/a	Verdadero	No estoy seguro/a	No estoy seguro/a	No estoy seguro/a	Verdadero	No estoy seguro/a	No estoy seguro/a	No estoy seguro/a	Falso	No estoy seguro/a	Verdadero
Quito	Quito	21	Femenino	UCE	Medicina Veterinaria y Zootecnia	1-3	SARS-COV-2	Creado en laboratorio	Una entidad viva	11 - 20	No estoy seguro/a	Verdadero	Verdadero	Verdadero	Falso	Falso	Verdadero	Verdadero	Verdadero	Verdadero	Verdadero	Verdadero	No estoy seguro/a	Verdadero	No estoy seguro/a	No estoy seguro/a	Verdadero	No estoy seguro/a	No estoy seguro/a	Falso	Verdadero	Falso	Falso	Verdadero
Tambillo	Quito	21	Masculino	UCE	Medicina Veterinaria	1-3	SARS-COV-2	De origen natural	Una entidad viva	1 - 10	Falso	Verdadero	Verdadero	Verdadero	Falso	Falso	Verdadero	Falso	Verdadero	Verdadero	Verdadero	Verdadero	Falso	Verdadero	No estoy seguro/a	No estoy seguro/a	Verdadero	Verdadero	Falso	Verdadero	Falso	Falso	No estoy seguro/a	Verdadero
quito	quito	20	Femenino	UCE	Medicina Veterinaria	1-3	SARS-COV-2	Creado en laboratorio	Un complot mediático	1 - 10	No estoy seguro/a	Verdadero	Verdadero	Verdadero	Falso	Falso	Verdadero	Falso	Verdadero	Verdadero	Verdadero	Verdadero	Verdadero	Verdadero	No estoy seguro/a	No estoy seguro/a	Verdadero	Verdadero	No estoy seguro/a	No estoy seguro/a	Verdadero	Falso	Falso	Verdadero
La Maná	La Maná	17	Masculino	UCE	medicina veterinaria y zootecnia	1-3	SARS-COV-2	De origen natural	Una entidad viva	21 - 30	Verdadero	Verdadero	Verdadero	Verdadero	Falso	Falso	Verdadero	Falso	Verdadero	Verdadero	Verdadero	Verdadero	Falso	Verdadero	No estoy seguro/a	Verdadero	No estoy seguro/a	Verdadero	Falso	Verdadero	Verdadero	Falso	Verdadero	Verdadero
Quito	Quito	18	Masculino	UCE	Medicina Veterinaria	1-3	SARS-COV-2	De origen natural	No estoy seguro/a	No estoy seguro/a	Falso	Verdadero	Verdadero	Verdadero	Falso	Falso	Verdadero	No estoy seguro/a	Verdadero	Verdadero	Verdadero	Verdadero	Verdadero	Verdadero	Falso	Verdadero	Verdadero	Verdadero	Falso	No estoy seguro/a	Verdadero	verdadero	Verdadero	Verdadero
Quito	Quito	24	Femenino	UCE	Veterinaria	1-3	SARS-COV-2	Creado en laboratorio	Un compuesto químico	1 - 10	Verdadero	Verdadero	Verdadero	Verdadero	Falso	Falso	No estoy seguro/a	Falso	Verdadero	Verdadero	Verdadero	Verdadero	Verdadero	Verdadero	Falso	No estoy seguro/a	Verdadero	Falso	No estoy seguro/a	Falso	Verdadero	Falso	Falso	No estoy seguro/a
Quito	Loja	24	Masculino	UCE	Medicina Veterinaria	1-3	SARS-COV-2	De origen natural	Una entidad viva	No estoy seguro/a	Falso	Verdadero	Verdadero	Verdadero	Verdadero	Falso	Verdadero	Falso	Verdadero	Verdadero	Verdadero	Verdadero	Verdadero	Verdadero	No estoy seguro/a	No estoy seguro/a	Falso	Falso	Falso	Verdadero	Verdadero	Falso	Falso	Verdadero	Me parecería óptimo que se facilite una retroalimentación para fortalecer el conocimiento.
QUITO	REGIÓN DE MURCIA	18	Masculino	UCE	MEDICINA VETERINARIA	1-3	SARS-COV-2	De origen natural	No estoy seguro/a	1 - 10	No estoy seguro/a	Verdadero	Verdadero	Verdadero	Falso	Falso	Verdadero	No estoy seguro/a	Verdadero	Verdadero	Verdadero	Verdadero	Verdadero	Verdadero	No estoy seguro/a	No estoy seguro/a	No estoy seguro/a	Falso	No estoy seguro/a	No estoy seguro/a	Verdadero	Falso	Falso	Verdadero
PROVINCIA SANTA ELENA	QUITO	18	Masculino	UCE	VETERINARIO	1-3	COVID-19	Creado en laboratorio	Un compuesto químico	31 - 40	Falso	Verdadero	Verdadero	Verdadero	Falso	Falso	No estoy seguro/a	Verdadero	Verdadero	Verdadero	Verdadero	Verdadero	Verdadero	Verdadero	No estoy seguro/a	Falso	Verdadero	Falso	verdadero	Verdadero	Verdadero	Falso	Verdadero	Verdadero	Todo esta bien realizado las preguntas
La Union	Esmeraldas	19	Femenino	UCE	medicina veterinaria y zootecnia	1-3	SARS-COV-2	Creado en laboratorio	No estoy seguro/a	11 - 20	No estoy seguro/a	Verdadero	No estoy seguro/a	Verdadero	No estoy seguro/a	Falso	Verdadero	Verdadero	Verdadero	Verdadero	Verdadero	Verdadero	Verdadero	Verdadero	No estoy seguro/a	No estoy seguro/a	No estoy seguro/a	No estoy seguro/a	Falso	Verdadero	Verdadero	Falso	Verdadero	Verdadero
el angel	el angel	24	Masculino	UCE	medicina veterinaria	1-3	SARS-COV-2	Creado en laboratorio	Un complot mediático	1 - 10	Verdadero	Verdadero	Verdadero	No estoy seguro/a	Falso	Falso	Verdadero	Falso	Verdadero	Verdadero	Verdadero	Verdadero	Verdadero	Verdadero	Falso	Verdadero	Verdadero	Falso	verdadero	Verdadero	Verdadero	Falso	Falso	Verdadero
Quito	Santo Domingo de los Tsáchilas	18	Femenino	UCE	Medicina Veterinaria y Zootecnia	1-3	SARS-COV-2	De origen natural	Un complot mediático	11 - 20	Falso	Verdadero	Verdadero	Verdadero	Falso	Falso	Verdadero	Falso	Verdadero	Verdadero	Verdadero	Verdadero	Verdadero	Verdadero	Falso	Falso	No estoy seguro/a	No estoy seguro/a	verdadero	Verdadero	Verdadero	Falso	Verdadero	Verdadero
Guayas	Guayaquil	19	Femenino	YACHAY	Biología	1-3	COVID-19	Creado en laboratorio	Una entidad viva	21 - 30	No estoy seguro/a	Verdadero	No estoy seguro/a	Verdadero	Falso	Falso	Verdadero	Falso	Verdadero	Verdadero	Verdadero	Verdadero	Verdadero	Verdadero	Falso	Verdadero	Verdadero	Falso	No estoy seguro/a	No estoy seguro/a	Verdadero	Falso	No estoy seguro/a	Verdadero
Ibarra	Santa Elena	20	Masculino	YACHAY	Ingeniería en Tecnologías de la Información	1-3	SARS-COV-2	De origen natural	Un compuesto químico	11 - 20	No estoy seguro/a	Verdadero	Verdadero	Verdadero	Falso	Falso	Verdadero	Falso	Verdadero	Verdadero	Verdadero	Verdadero	Verdadero	Verdadero	No estoy seguro/a	No estoy seguro/a	Verdadero	Falso	Falso	Falso	Verdadero	Falso	Falso	Verdadero
Ibarra	Ibarra	20	Femenino	YACHAY	Química	4-6	MERS-19	De origen natural	Una entidad viva	11 - 20	Falso	Verdadero	Verdadero	Verdadero	Falso	Falso	Verdadero	Verdadero	Verdadero	Verdadero	Verdadero	Verdadero	Verdadero	Verdadero	Falso	Verdadero	Falso	Verdadero	Falso	Falso	Verdadero	Falso	Verdadero	Verdadero	Las preguntas estuvieron muy bien elaboradas, solo que una vez que se tenga el registro universitario, estaría bien también abarcar toda la población en general sería de mucha ayuda para las personas que siguen creyendo que el virus no existe.
Cañar	Cañar	18	Masculino	YACHAY	Tecnologías de la Información y Comunicación	1-3	SARS-COV-2	De origen natural	Un compuesto químico	1 - 10	Verdadero	Verdadero	Falso	Verdadero	Falso	Falso	Verdadero	Falso	Verdadero	Verdadero	Verdadero	Verdadero	Verdadero	Verdadero	Falso	Falso	Verdadero	Falso	Falso	Falso	Verdadero	Falso	Falso	Verdadero	En mi caso, pienso que al final se podría compartir con los que realizamos las encuentras información del virus SARS-CoV-2, para así informarnos más del tema. También pienso que sería una buena opción el hacer preguntas o relacionarlo con los virus que son muy parecidos a este (como por ejemplo el SARS-CoV o el MERS que se parecen en sus síntomas, forma de propagación y eso) Además también se pod…
Quito	Quito	23	Femenino	YACHAY	Ingeniería en polímeros	1-3	SARS-COV-2	De origen natural	Una entidad viva	1 - 10	Verdadero	Verdadero	Verdadero	Verdadero	Verdadero	Falso	Verdadero	Falso	Verdadero	Verdadero	Verdadero	Verdadero	Verdadero	Verdadero	Falso	Verdadero	Verdadero	Verdadero	Falso	Falso	Verdadero	Falso	Falso	Verdadero	Hasta donde tengo conocimientos los virus no tienen vida, así que creo que debería haber esa opción en el literal que pregunta eso. Además, hace una semana atrás se identificó que la saliva podría ser un aliado para la detección más rápida y oportuna del virus. Podrían investigar sobre las posibilidades que tendría el Ecuador de aplicar este tipo de metodología.
Pasaje	Pasaje	18	Masculino	YACHAY	Biomedicina	1-3	SARS-COV-2	De origen natural	Una entidad viva	1 - 10	Verdadero	Falso	Verdadero	Verdadero	Falso	Falso	Verdadero	Falso	Falso	Verdadero	Verdadero	Verdadero	Falso	Verdadero	Falso	Verdadero	No estoy seguro/a	Falso	Falso	Verdadero	Verdadero	Falso	Falso	Verdadero
Urcuqui	Colombia	21	Femenino	YACHAY	Nanotecnologia	1-3	SARS-COV-2	De origen natural	Una entidad viva	1 - 10	Verdadero	Verdadero	Verdadero	Verdadero	Falso	Falso	Verdadero	No estoy seguro/a	Verdadero	Verdadero	Verdadero	Verdadero	Verdadero	Verdadero	No estoy seguro/a	Falso	No estoy seguro/a	Verdadero	Falso	No estoy seguro/a	Verdadero	Falso	Falso	Verdadero
Campus Yachay	Sígsig-Azuay	20	Masculino	YACHAY	Petroquímica	1-3	SARS-COV-2	Creado en laboratorio	Una entidad viva	1 - 10	Verdadero	Verdadero	Verdadero	Verdadero	Verdadero	Falso	Verdadero	Verdadero	Verdadero	Verdadero	Verdadero	Verdadero	Verdadero	Verdadero	Falso	Verdadero	Verdadero	Falso	Falso	Verdadero	Falso	Falso	Verdadero	Verdadero	Continúen con estas encuestas; nos despiertan interés.
Ibarra	Ibarra	20	Femenino	YACHAY	Matemática	1-3	SARS-COV-2	De origen natural	Una entidad viva	11 - 20	Verdadero	Verdadero	Verdadero	Verdadero	No estoy seguro/a	Falso	Verdadero	Falso	Verdadero	Verdadero	Verdadero	Verdadero	Verdadero	Verdadero	No estoy seguro/a	No estoy seguro/a	Verdadero	Falso	Falso	Verdadero	Verdadero	Falso	Verdadero	Verdadero
Gualaceo	Gualaceo	21	Femenino	UTPL	Inglés	4-6	SARS-COV-2	No estoy seguro/a	Una entidad viva	11 - 20	Falso	Verdadero	Verdadero	Verdadero	No estoy seguro/a	Falso	Verdadero	Verdadero	Verdadero	Verdadero	Verdadero	Verdadero	Verdadero	Verdadero	Falso	Verdadero	Falso	Falso	verdadero	Falso	Verdadero	Falso	Falso	Verdadero
Azogues	Azogues	27	Femenino	YACHAY	Educación en Ciencias Experimentales	4-6	No estoy seguro/a	Creado en laboratorio	No estoy seguro/a	No estoy seguro/a	No estoy seguro/a	Verdadero	Verdadero	Falso	Falso	Falso	Verdadero	Verdadero	Verdadero	Verdadero	Verdadero	Verdadero	Verdadero	Verdadero	No estoy seguro/a	No estoy seguro/a	No estoy seguro/a	Falso	No estoy seguro/a	Verdadero	Verdadero	Falso	Falso	Verdadero
Cuenca	Cuenca	19	Masculino	YACHAY	Educación en Ciencias Experimentales	4-6	SARS-COV-2	De origen natural	Una entidad viva	No estoy seguro/a	No estoy seguro/a	No estoy seguro/a	Verdadero	Verdadero	Falso	No estoy seguro/a	No estoy seguro/a	Falso	Verdadero	Verdadero	Verdadero	Verdadero	Verdadero	Verdadero	Falso	Verdadero	Falso	Falso	No estoy seguro/a	Verdadero	Falso	Falso	Falso	Verdadero	Necesitamos desarrollar las clases en el campus
Cuenca	Cuenca	28	Masculino	YACHAY	Educación en Ciencias Experimentales	4-6	SARS-COV-2	De origen natural	Una entidad viva	1 - 10	No estoy seguro/a	Verdadero	Verdadero	Verdadero	Verdadero	Falso	Verdadero	Verdadero	Verdadero	Verdadero	Verdadero	Verdadero	Verdadero	Verdadero	Falso	Verdadero	Verdadero	Falso	Falso	Falso	Falso	Falso	Falso	Verdadero
Quito	Loja	23	Masculino	YACHAY	Matemática	1-3	SARS-COV-2	Creado en laboratorio	Un compuesto químico	1 - 10	Verdadero	Verdadero	Verdadero	Verdadero	Falso	Falso	Verdadero	No estoy seguro/a	Verdadero	Verdadero	Verdadero	No estoy seguro/a	Verdadero	Verdadero	No estoy seguro/a	No estoy seguro/a	Verdadero	Falso	No estoy seguro/a	Falso	No estoy seguro/a	No estoy seguro/a	Falso	Verdadero	Desde que se propagó el virus he tomado capturas de pantalla sobre la búsqueda de "Coronavirus": https://drive.google.com/drive/folders/1YgoDeeohJEHUoX0V0WGrUrrpYmj3905E?usp=sharing He notado que el número de resultados varía.
Cuenca	Cuenca	21	Femenino	UNAE	Educación en Ciencias Experimentales	4-6	COVID-19	De origen natural	No estoy seguro/a	No estoy seguro/a	No estoy seguro/a	No estoy seguro/a	Verdadero	Verdadero	Falso	Falso	Verdadero	No estoy seguro/a	Verdadero	Verdadero	Verdadero	Verdadero	Verdadero	Verdadero	Verdadero	No estoy seguro/a	Falso	Verdadero	verdadero	No estoy seguro/a	Verdadero	Falso	Verdadero	Verdadero
Cuenca	Cuenca	20	Masculino	YACHAY	Licenciatura en educacion en ciencias experimentales	4-6	SARS-COV-2	Creado en laboratorio	Una entidad viva	No estoy seguro/a	No estoy seguro/a	Verdadero	Verdadero	Verdadero	Falso	Falso	Verdadero	Falso	Verdadero	Verdadero	Verdadero	Verdadero	Verdadero	Verdadero	Falso	Verdadero	Verdadero	Falso	Falso	Falso	Verdadero	Falso	Falso	Verdadero
La troncal	La troncal	18	Femenino	31 de Octubre	Ciencias	1-3	SARS-COV-2	De origen natural	No estoy seguro/a	21 - 30	Verdadero	Verdadero	No estoy seguro/a	Verdadero	Falso	Falso	Verdadero	Falso	Verdadero	Verdadero	Verdadero	No estoy seguro/a	Verdadero	Verdadero	No estoy seguro/a	No estoy seguro/a	No estoy seguro/a	No estoy seguro/a	Falso	No estoy seguro/a	Verdadero	Falso	No estoy seguro/a	Verdadero
Quito	Quito	20	Femenino	YACHAY	Química	1-3	SARS-COV-2	De origen natural	Un compuesto químico	1 - 10	Verdadero	Verdadero	Verdadero	Verdadero	Falso	Falso	Verdadero	Falso	Verdadero	Verdadero	Verdadero	Verdadero	Verdadero	Verdadero	No estoy seguro/a	Verdadero	No estoy seguro/a	Falso	Falso	Falso	Verdadero	Falso	Falso	Verdadero
Cuenca	Cuenca	24	Masculino	YACHAY	Ciencias Experimentales	4-6	SARS-COV-2	De origen natural	Un compuesto químico	11 - 20	No estoy seguro/a	Verdadero	Verdadero	Verdadero	No estoy seguro/a	Falso	Verdadero	Falso	Verdadero	Verdadero	Verdadero	Verdadero	Verdadero	Verdadero	Falso	No estoy seguro/a	No estoy seguro/a	Falso	Falso	No estoy seguro/a	Verdadero	No estoy seguro/a	Falso	No estoy seguro/a	Ninguna
Cuenca	Cuenca	19	Masculino	YACHAY	Educación en ciencias experimentales	4-6	SARS-COV-2	No estoy seguro/a	Una entidad viva	11 - 20	Falso	Verdadero	Verdadero	Verdadero	Verdadero	Falso	Verdadero	Falso	Verdadero	Verdadero	Verdadero	Verdadero	Verdadero	Verdadero	Falso	Verdadero	Verdadero	Falso	Falso	Verdadero	Verdadero	Falso	Falso	Verdadero
Ibarra	Quito	18	Masculino	YACHAY	Biomedicina	1-3	SARS-COV-2	De origen natural	Una entidad viva	31 - 40	No estoy seguro/a	Verdadero	Verdadero	Verdadero	Falso	Falso	Verdadero	Verdadero	Verdadero	Verdadero	Verdadero	Verdadero	Verdadero	Verdadero	Falso	Verdadero	No estoy seguro/a	Falso	No estoy seguro/a	No estoy seguro/a	Verdadero	Falso	Falso	Verdadero
Huaquillas	Huaquillas	20	Masculino	YACHAY	Geología	1-3	SARS-COV-2	De origen natural	Una entidad viva	1 - 10	No estoy seguro/a	Verdadero	Verdadero	Verdadero	No estoy seguro/a	Falso	Verdadero	Verdadero	Verdadero	Verdadero	Verdadero	Verdadero	Verdadero	Verdadero	No estoy seguro/a	Verdadero	Falso	Falso	Falso	No estoy seguro/a	No estoy seguro/a	Falso	Falso	Verdadero
Suscal	Cañar	21	Masculino	YACHAY	Educación en Ciencias Experimentales	4-6	SARS-COV-2	No estoy seguro/a	No estoy seguro/a	No estoy seguro/a	Falso	Verdadero	No estoy seguro/a	Verdadero	No estoy seguro/a	Falso	Verdadero	Verdadero	Verdadero	Verdadero	Verdadero	Verdadero	Verdadero	Verdadero	No estoy seguro/a	No estoy seguro/a	Falso	Falso	No estoy seguro/a	Falso	Falso	Falso	Falso	Verdadero	Ninguna sugerencia.
Quito	Salcedo	20	Masculino	YACHAY	Química	1-3	SARS-COV-2	De origen natural	Una entidad viva	No estoy seguro/a	No estoy seguro/a	Verdadero	Verdadero	Verdadero	Falso	Falso	Verdadero	Verdadero	Verdadero	Verdadero	Verdadero	Verdadero	Verdadero	Verdadero	Verdadero	Verdadero	Verdadero	Falso	Falso	No estoy seguro/a	No estoy seguro/a	Falso	Falso	Verdadero
Celica-Loja	Loja	20	Masculino	YACHAY	Nanotecnología	4-6	SARS-COV-2	Creado en laboratorio	No estoy seguro/a	No estoy seguro/a	Falso	Verdadero	No estoy seguro/a	Verdadero	Falso	Falso	Verdadero	Verdadero	Verdadero	Verdadero	Verdadero	Verdadero	Verdadero	Verdadero	Falso	No estoy seguro/a	Verdadero	Falso	Falso	No estoy seguro/a	No estoy seguro/a	Falso	Verdadero	Verdadero	Sin comentarios
Loja	Loja	19	Femenino	YACHAY	Ingienería en Biomedicina	1-3	SARS-COV-2	De origen natural	Una entidad viva	No estoy seguro/a	No estoy seguro/a	Verdadero	Verdadero	Verdadero	Falso	Falso	Verdadero	No estoy seguro/a	Verdadero	Verdadero	Verdadero	Verdadero	Verdadero	Verdadero	Falso	Verdadero	No estoy seguro/a	Falso	Falso	No estoy seguro/a	Verdadero	Falso	No estoy seguro/a	No estoy seguro/a
Riobamba	Riobamba	20	Masculino	YACHAY	Geología	1-3	No estoy seguro/a	No estoy seguro/a	Un compuesto químico	1 - 10	Falso	Verdadero	Verdadero	Verdadero	Falso	Falso	Falso	Verdadero	Verdadero	Verdadero	Verdadero	No estoy seguro/a	Verdadero	Verdadero	Falso	Verdadero	Verdadero	Falso	Falso	Falso	Verdadero	Falso	Falso	Verdadero
Machachi	Machachi	20	Masculino	YACHAY	Geologia	1-3	SARS-COV-2	Creado en laboratorio	Una entidad viva	11 - 20	Falso	Verdadero	Verdadero	Verdadero	Falso	Falso	Verdadero	No estoy seguro/a	Verdadero	Verdadero	Verdadero	Verdadero	Verdadero	Verdadero	Falso	Falso	Verdadero	Falso	Falso	Falso	Verdadero	verdadero	Falso	Verdadero
Manta	Manta	18	Masculino	YACHAY	Física	1-3	SARS-COV-2	De origen natural	Una entidad viva	1 - 10	Verdadero	Verdadero	Verdadero	Verdadero	Falso	Falso	Verdadero	Verdadero	Verdadero	Verdadero	Verdadero	Verdadero	Verdadero	Verdadero	Falso	Verdadero	Verdadero	Falso	Falso	Falso	Verdadero	Falso	Falso	Verdadero
Atacames	Esmeraldas	20	Masculino	YACHAY	Quimica	1-3	SARS-COV-2	De origen natural	Un complot mediático	No estoy seguro/a	Verdadero	Verdadero	Verdadero	Verdadero	No estoy seguro/a	Falso	Verdadero	Verdadero	Falso	Verdadero	Verdadero	Verdadero	Verdadero	Verdadero	Verdadero	Verdadero	Falso	Falso	No estoy seguro/a	No estoy seguro/a	No estoy seguro/a	Falso	Verdadero	Verdadero
Quito	Quito	19	Masculino	YACHAY	fisica	1-3	COVID-19	Creado en laboratorio	Un compuesto químico	1 - 10	No estoy seguro/a	Falso	Verdadero	Verdadero	Falso	Falso	Verdadero	Falso	Verdadero	Verdadero	Verdadero	Verdadero	Verdadero	Verdadero	Verdadero	Verdadero	Falso	No estoy seguro/a	Falso	Falso	Falso	Falso	Falso	Verdadero
quito	tanicuchi	30	Otro	prueba	veterinaria	1-3	MERS-19	Creado en laboratorio	No estoy seguro/a	31 - 40	Verdadero	Falso	Verdadero	Verdadero	Falso	Falso	Verdadero	Verdadero	Verdadero	Falso	Verdadero	No estoy seguro/a	Verdadero	Falso	Verdadero	Verdadero	Falso	Falso	Falso	Falso	Verdadero	verdadero	Verdadero	Verdadero
Cuenca.	Cuenca.	19	Masculino	YACHAY	Educación en Ciencias Experimentales.	4-6	SARS-COV-2	De origen natural	Una entidad viva	21 - 30	Verdadero	Verdadero	Verdadero	Verdadero	Verdadero	Falso	Verdadero	Verdadero	Verdadero	Verdadero	Verdadero	Verdadero	Falso	Verdadero	Falso	Verdadero	Verdadero	Verdadero	Falso	Verdadero	Verdadero	Falso	Falso	Verdadero	Otra prevención para evitar la propagación del coronavirus es el distanciamiento de dos metros.
Cuenca	Cuenca	25	Masculino	Unae	Ciencias experimentales	4-6	COVID-19	Creado en laboratorio	Un complot mediático	11 - 20	Verdadero	Verdadero	Falso	Verdadero	Falso	Falso	Verdadero	Verdadero	Verdadero	Verdadero	Verdadero	Verdadero	Verdadero	Verdadero	Falso	Verdadero	No estoy seguro/a	No estoy seguro/a	No estoy seguro/a	Verdadero	Falso	Falso	Falso	Verdadero	Ningún comentario
cuenca	cuenca	23	Masculino	YACHAY	Licenciatura ECE	4-6	COVID-19	Creado en laboratorio	Un complot mediático	11 - 20	Verdadero	Verdadero	Verdadero	Verdadero	Verdadero	Falso	Verdadero	Falso	Verdadero	Verdadero	Verdadero	Verdadero	Verdadero	Verdadero	Falso	Verdadero	Verdadero	Falso	verdadero	No estoy seguro/a	Falso	Falso	Verdadero	Verdadero
ibarra	quito	35	Masculino	utn	biotecnología	9 en adelante	SARS-COV-2	De origen natural	No estoy seguro/a	1 - 10	Verdadero	Verdadero	Verdadero	Verdadero	Falso	Falso	Verdadero	Falso	Verdadero	Verdadero	Verdadero	Verdadero	Verdadero	Verdadero	Falso	Verdadero	Verdadero	Verdadero	Falso	Falso	Verdadero	Falso	Falso	Verdadero	Pedro Barba no tomar en cuenta para el análisis
Otavalo	Otavalo	23	Masculino	YACHAY	Tronco Comun (Nanotecnologia)	4-6	SARS-COV-2	De origen natural	Una entidad viva	No estoy seguro/a	Verdadero	Verdadero	Verdadero	Verdadero	Falso	Falso	Verdadero	Falso	Verdadero	Verdadero	Verdadero	Verdadero	Verdadero	Verdadero	Verdadero	No estoy seguro/a	Verdadero	Falso	Falso	Falso	No estoy seguro/a	Falso	Falso	Verdadero
Manta	Manta	19	Femenino	YACHAY	Ingeniería Biomédica	1-3	SARS-COV-2	De origen natural	Una entidad viva	No estoy seguro/a	Falso	Verdadero	Verdadero	Verdadero	Falso	Falso	Verdadero	Falso	Verdadero	Verdadero	Verdadero	Verdadero	Verdadero	Verdadero	No estoy seguro/a	No estoy seguro/a	Verdadero	Falso	Falso	Falso	Verdadero	Falso	Falso	Verdadero	Sería bueno que los docentes puedan ilustrarnos un poco más acerca del COVID-19 para aclarar ciertas dudas y falsos mitos de este.
QUITO	QUITO	21	Femenino	YACHAY	TICS	1-3	SARS-COV-2	De origen natural	Una entidad viva	No estoy seguro/a	Falso	Verdadero	Verdadero	Verdadero	Falso	Falso	Verdadero	Falso	Verdadero	Verdadero	Verdadero	Verdadero	Verdadero	Verdadero	No estoy seguro/a	Falso	No estoy seguro/a	No estoy seguro/a	Falso	No estoy seguro/a	Verdadero	Falso	Falso	Verdadero
SANTO DOMINGO	PEDERNALES	19	Masculino	YACHAY	NANOTECNOLOGIA	1-3	SARS-COV-2	De origen natural	Una entidad viva	1 - 10	Falso	Verdadero	Verdadero	Verdadero	Falso	Falso	Verdadero	Falso	Verdadero	Verdadero	Verdadero	Verdadero	Falso	Verdadero	Falso	Verdadero	Verdadero	Falso	Falso	Falso	Verdadero	Falso	Falso	Verdadero	NINGUNA
Azogues	Azogues	26	Masculino	YACHAY	Educación en ciencias experimentales	4-6	SARS-COV-2	Creado en laboratorio	Un complot mediático	No estoy seguro/a	No estoy seguro/a	Verdadero	Verdadero	Verdadero	Falso	Falso	Verdadero	Falso	No estoy seguro/a	Verdadero	Verdadero	Verdadero	Verdadero	Verdadero	Falso	Verdadero	Verdadero	Falso	Falso	Verdadero	No estoy seguro/a	Falso	Falso	Verdadero
Urcuqui	Ibarra	22	Femenino	UTN	Agroindustria	1-3	COVID-19	Creado en laboratorio	No estoy seguro/a	1 - 10	Verdadero	Verdadero	Verdadero	Verdadero	Falso	Falso	Verdadero	Falso	Verdadero	Verdadero	Verdadero	Verdadero	Verdadero	Verdadero	No estoy seguro/a	No estoy seguro/a	No estoy seguro/a	Verdadero	Falso	Verdadero	Verdadero	Falso	Falso	Verdadero
Cayambe	Pichincha~Cayambe	18	Masculino	UTN	Agroindustrias	1-3	SARS-COV-2	Creado en laboratorio	Un compuesto químico	31 - 40	Verdadero	Verdadero	Verdadero	Verdadero	Falso	Falso	Verdadero	Falso	Verdadero	Verdadero	Verdadero	Falso	Verdadero	Verdadero	No estoy seguro/a	Verdadero	No estoy seguro/a	Falso	Falso	Falso	Verdadero	Falso	Falso	Verdadero	Yo creo todas las preguntas si son fundamentales, para saber evitar confusiones si se puede contagiar o si con remedios caseros se puede uno salvar
Otavalo	Otavalo	19	Masculino	UTN	Via Tulcán	1-3	COVID-19	Creado en laboratorio	Un complot mediático	31 - 40	Verdadero	Falso	Verdadero	Falso	Falso	Verdadero	Verdadero	No estoy seguro/a	Verdadero	Verdadero	Falso	Verdadero	Verdadero	Verdadero	Falso	Falso	Verdadero	Verdadero	verdadero	Falso	Verdadero	Falso	Falso	Verdadero
Atuntaqui	Atuntaqui	20	Femenino	UTN	Agroindustria	1-3	COVID-19	Creado en laboratorio	Un complot mediático	No estoy seguro/a	Verdadero	Verdadero	Verdadero	Verdadero	Verdadero	Falso	Verdadero	Falso	Verdadero	Verdadero	Verdadero	Verdadero	Verdadero	Verdadero	Verdadero	No estoy seguro/a	No estoy seguro/a	Falso	Falso	Falso	Verdadero	Falso	Falso	Verdadero
Ibarra	Ibarra	20	Femenino	UTN	Agroindustria	1-3	SARS-COV-2	Creado en laboratorio	Una entidad viva	21 - 30	Falso	Verdadero	Verdadero	Verdadero	Falso	Falso	Verdadero	Falso	Verdadero	Verdadero	Verdadero	Verdadero	Verdadero	Verdadero	Falso	No estoy seguro/a	Verdadero	Falso	Falso	Falso	Verdadero	Falso	Verdadero	Verdadero
Ibarra	Quito	20	Femenino	UTN	Ingeniería Agroindustrial	1-3	SARS-COV-2	De origen natural	Una entidad viva	41 - 50	Verdadero	Verdadero	Verdadero	Verdadero	Falso	Falso	Verdadero	No estoy seguro/a	Verdadero	Verdadero	Verdadero	Verdadero	Verdadero	Verdadero	Falso	Verdadero	Verdadero	Falso	verdadero	Verdadero	Verdadero	Falso	No estoy seguro/a	Verdadero	Me pareció muy buena la encuesta sus preguntas estuvieron muy bien estructuradas
Cayambe	Cayambe	20	Femenino	UTN	Carrera de Agroindustria	1-3	SARS-COV-2	De origen natural	Un complot mediático	No estoy seguro/a	Falso	Verdadero	Verdadero	Verdadero	Falso	Falso	Verdadero	Falso	Verdadero	Verdadero	Verdadero	No estoy seguro/a	Verdadero	Verdadero	No estoy seguro/a	No estoy seguro/a	Verdadero	No estoy seguro/a	No estoy seguro/a	No estoy seguro/a	Falso	No estoy seguro/a	Falso	Verdadero
Cayambe	Cayambe	20	Femenino	Universidad Técnica del Norte	Agroindustrias	1-3	SARS-COV-2	No estoy seguro/a	No estoy seguro/a	11 - 20	Falso	Verdadero	Verdadero	Verdadero	Falso	Falso	Verdadero	Verdadero	Verdadero	Verdadero	Verdadero	Verdadero	Verdadero	Verdadero	No estoy seguro/a	Verdadero	No estoy seguro/a	Falso	Falso	Falso	Verdadero	verdadero	Falso	Verdadero
Ibarra	Ibarra	19	Masculino	UTN	Ingeniería Agroindustrial	1-3	SARS-COV-2	De origen natural	No estoy seguro/a	1 - 10	Falso	Verdadero	Verdadero	Verdadero	Falso	Falso	Verdadero	Falso	Falso	Verdadero	Verdadero	Verdadero	Verdadero	Verdadero	No estoy seguro/a	No estoy seguro/a	No estoy seguro/a	Falso	Falso	Verdadero	Verdadero	Falso	Falso	Verdadero
Ibarra	Ibarra	21	Masculino	UTN	Universidad Técnica Del Norte	1-3	COVID-19	De origen natural	Una entidad viva	51 - 100	Verdadero	Verdadero	Verdadero	Verdadero	Falso	Falso	Verdadero	Falso	Verdadero	Verdadero	Verdadero	Verdadero	Verdadero	Verdadero	Verdadero	No estoy seguro/a	No estoy seguro/a	Verdadero	No estoy seguro/a	Verdadero	Verdadero	verdadero	Falso	Verdadero	Esperemos que toda esta pandemia sea para mejorar el mundo y el pensar de las personas .
Ibarra	Ibarra	21	Masculino	UTN	Agroindutrial	1-3	SARS-COV-2	De origen natural	Una entidad viva	1 - 10	Verdadero	Verdadero	Verdadero	Verdadero	Falso	Falso	No estoy seguro/a	Falso	Verdadero	Verdadero	Verdadero	Verdadero	Verdadero	Verdadero	No estoy seguro/a	Falso	Falso	Falso	verdadero	Verdadero	Verdadero	Falso	Falso	Verdadero
Atuntaqui	Sangolqui	23	Femenino	UTN	Ingenieria en agroindustrias	1-3	No estoy seguro/a	Creado en laboratorio	No estoy seguro/a	31 - 40	Falso	Verdadero	Verdadero	Verdadero	Falso	Falso	Verdadero	Falso	Verdadero	Verdadero	Falso	Verdadero	Verdadero	Verdadero	Falso	No estoy seguro/a	Verdadero	Falso	verdadero	Verdadero	Falso	Falso	Falso	Verdadero
Ibarra	Ibarra	19	Masculino	UTN	Agroindustria	1-3	SARS-COV-2	Creado en laboratorio	No estoy seguro/a	41 - 50	No estoy seguro/a	Verdadero	Verdadero	Verdadero	No estoy seguro/a	No estoy seguro/a	Verdadero	No estoy seguro/a	Verdadero	Verdadero	Verdadero	Verdadero	Verdadero	Verdadero	Falso	No estoy seguro/a	No estoy seguro/a	Falso	No estoy seguro/a	Verdadero	Verdadero	Falso	No estoy seguro/a	Verdadero	Me parece muy bueno de su parte el haber hecho esta encuesta ya que así podemos aprender un poco más sobre este tema y también a compartir información que algunos no conocen
Otavalo	otavalo	20	Masculino	UTN	Agroindustrias	1-3	SARS-COV-2	Creado en laboratorio	Un complot mediático	No estoy seguro/a	No estoy seguro/a	Verdadero	Verdadero	Verdadero	Falso	Falso	Verdadero	Verdadero	Verdadero	Verdadero	Verdadero	Verdadero	Verdadero	Verdadero	Verdadero	No estoy seguro/a	No estoy seguro/a	No estoy seguro/a	Falso	No estoy seguro/a	Verdadero	Falso	Verdadero	Verdadero
Ibarra	Ibarra	22	Femenino	Universidad tecnica del norte	Ingenieria agroindustrial	1-3	SARS-COV-2	De origen natural	Una entidad viva	21 - 30	Verdadero	Verdadero	Verdadero	Verdadero	Falso	Falso	Verdadero	Falso	Verdadero	Falso	Verdadero	Verdadero	Verdadero	Verdadero	Falso	Verdadero	Verdadero	Falso	No estoy seguro/a	Verdadero	Verdadero	Falso	Verdadero	Verdadero
Otavalo	Otavalo	21	Masculino	Universidad Técnica del Norte	Ingeniería en Agroindustrias	1-3	SARS-COV-2	Creado en laboratorio	No estoy seguro/a	1 - 10	No estoy seguro/a	Verdadero	Verdadero	Verdadero	Falso	Falso	Verdadero	No estoy seguro/a	Verdadero	Verdadero	Verdadero	Verdadero	Verdadero	Verdadero	No estoy seguro/a	No estoy seguro/a	Verdadero	Verdadero	Falso	No estoy seguro/a	No estoy seguro/a	Falso	Falso	Verdadero	Me parece muy bien que hagan este tipo de encuestas ya que permiten indentificar con un tanteo cuanto conocemos de virus, ya que es muy importante que la gente tenga un conocimiento y pueda enfrentar de mejor manera a este virus.
Ibarra	Ibarra	23	Masculino	UTN	Ingeniería Agroindustrial	1-3	COVID-19	De origen natural	No estoy seguro/a	No estoy seguro/a	No estoy seguro/a	Verdadero	Verdadero	Verdadero	Verdadero	Falso	Verdadero	No estoy seguro/a	Verdadero	Verdadero	Verdadero	Verdadero	Verdadero	Verdadero	No estoy seguro/a	Verdadero	No estoy seguro/a	Falso	No estoy seguro/a	Falso	Verdadero	Falso	Falso	Verdadero
El Ángel	El Ángel	20	Masculino	UTN	Ingeniería Agroindustrial	1-3	SARS-COV-2	De origen natural	No estoy seguro/a	1 - 10	Verdadero	Verdadero	Verdadero	Verdadero	No estoy seguro/a	Falso	Verdadero	Verdadero	Verdadero	Verdadero	Verdadero	Verdadero	No estoy seguro/a	Verdadero	No estoy seguro/a	Verdadero	Verdadero	Falso	Falso	Falso	Verdadero	Falso	Falso	Verdadero	Espero que la vacuna que se ha desarrollado en Oxford sea la solución a este problema y que pronto regresemos a nuestras vidas como antes
Otavalo	Otavalo	21	Masculino	UTN	Agroindustria	1-3	SARS-COV-2	No estoy seguro/a	Un compuesto químico	11 - 20	Verdadero	Verdadero	Verdadero	Verdadero	Falso	Verdadero	Verdadero	Verdadero	Verdadero	Verdadero	Verdadero	Verdadero	Verdadero	Verdadero	Falso	Falso	Verdadero	Falso	Falso	No estoy seguro/a	Falso	Falso	Falso	Verdadero	el virus es peligroso y hay que cuidarse por el bien de cada uno y de nuestras familias
Cayambe	Manta	20	Femenino	UTN	Ingeniería Agroindustria l	1-3	COVID-19	De origen natural	Una entidad viva	51 - 100	Verdadero	Verdadero	Verdadero	Verdadero	Falso	Falso	No estoy seguro/a	Falso	Verdadero	Verdadero	Verdadero	Verdadero	Verdadero	Verdadero	Verdadero	No estoy seguro/a	Verdadero	Verdadero	No estoy seguro/a	Verdadero	Verdadero	Falso	Falso	Verdadero	En las respuestas de los guantes si son necesario considerando de mi parte deberían preguntar el porque ya que no son tan convenientes porque las personas así no usarían constantemente gel o alcohol.
Ibarra	Ibarra	19	Femenino	UTN	Agroindustria	1-3	SARS-COV-2	No estoy seguro/a	No estoy seguro/a	No estoy seguro/a	Verdadero	Verdadero	Verdadero	Verdadero	Falso	Falso	Verdadero	Falso	Verdadero	Verdadero	Verdadero	Verdadero	Verdadero	Verdadero	Falso	Verdadero	No estoy seguro/a	No estoy seguro/a	Falso	No estoy seguro/a	Verdadero	Falso	Falso	Verdadero	Es una buena iniciativa realizar encuestas respecto al COVID-19, ya que muchos no contamos con la suficiente información que se debe tener frente a este virus.
Atuntaqui	Quito	21	Femenino	UTN	Agroindustria	1-3	SARS-COV-2	Creado en laboratorio	Un compuesto químico	51 - 100	Verdadero	Verdadero	Verdadero	Verdadero	Falso	Falso	Verdadero	Falso	Verdadero	Verdadero	Verdadero	Falso	Verdadero	Falso	Verdadero	No estoy seguro/a	Falso	Falso	Falso	Falso	Verdadero	Falso	Falso	Verdadero	Para mi el COVID-19 es un virus el cual esta acabando con una parte de la población mundial la cual para que no cause mas muertes o mas contagios es necesario tomar medidas de bioseguridad cuidarse uno mismo y a los suyos el contagio depende de uno mismo si somos responsables podremos salir a adelante.
El Ángel	El Ángel	21	Femenino	UTN	Agroindustrias	1-3	No estoy seguro/a	No estoy seguro/a	Una entidad viva	41 - 50	No estoy seguro/a	Verdadero	No estoy seguro/a	Verdadero	Falso	Falso	No estoy seguro/a	No estoy seguro/a	Verdadero	Verdadero	Verdadero	Verdadero	No estoy seguro/a	Verdadero	No estoy seguro/a	No estoy seguro/a	Verdadero	Falso	No estoy seguro/a	No estoy seguro/a	Falso	No estoy seguro/a	No estoy seguro/a	Verdadero	Debemos tener absoluto cuidado con nuestra salud, debemos seguir todas las normas de bioseguridad. Es nuestra responsanilidad.
Ibarra	Ibarra	22	Femenino	UTN	AGROINDUSTRIAS	1-3	COVID-19	De origen natural	Un complot mediático	21 - 30	No estoy seguro/a	Verdadero	Verdadero	Verdadero	Verdadero	Falso	Verdadero	Falso	Verdadero	Verdadero	Verdadero	Verdadero	Verdadero	Verdadero	Falso	No estoy seguro/a	No estoy seguro/a	Verdadero	No estoy seguro/a	Falso	Verdadero	Falso	Verdadero	Verdadero	Me parece importante este tipo de encuestas ya que es necesario saber si las personas están bien informadas acerca del COVID-19 y si toman las debidas precauciones
Otavalo	Otavalo	21	Femenino	UTN	ING Agroindustrial	1-3	SARS-COV-2	Creado en laboratorio	Una entidad viva	11 - 20	No estoy seguro/a	Verdadero	Verdadero	Verdadero	Falso	Falso	Verdadero	Falso	Verdadero	Verdadero	Verdadero	Verdadero	Verdadero	Verdadero	No estoy seguro/a	Verdadero	Verdadero	Falso	Falso	Falso	Verdadero	Falso	Verdadero	Verdadero	Una recomendación sería tener un poco más de precaución al salir a la calle y evitar lugares donde hay mayor aglomeración de personas y evitar compartir cosas que hayan sido manipuladas y más si han estado con contacto salival
CAYAMBE	CAYAMBE	19	Femenino	UTN	INGENIERIA AGRO INDUSTRIAL	1-3	SARS-COV-2	Creado en laboratorio	Una entidad viva	51 - 100	Verdadero	Verdadero	Verdadero	Verdadero	Falso	Falso	Falso	Verdadero	Verdadero	Verdadero	Verdadero	Verdadero	Verdadero	Verdadero	No estoy seguro/a	Verdadero	Verdadero	Verdadero	Falso	Verdadero	Verdadero	Falso	Verdadero	Verdadero	SE PUEDE TENER UN POCO MAS DE INFROMACION VERIDICA Y NO MAQUILLADA YA QUE E SIMPOTANTE SABER EN REALIDAD QUE PASA CON EL VIRUS
Ibarra	Ibarra	18	Masculino	UTN	Agroindustrial	1-3	SARS-COV-2	Creado en laboratorio	No estoy seguro/a	51 - 100	No estoy seguro/a	Verdadero	Verdadero	Verdadero	No estoy seguro/a	Falso	Verdadero	Falso	Verdadero	Verdadero	Verdadero	Verdadero	Falso	Verdadero	No estoy seguro/a	No estoy seguro/a	No estoy seguro/a	Falso	No estoy seguro/a	Falso	Falso	No estoy seguro/a	No estoy seguro/a	Verdadero	Pues yo considero que se deberían consientizar y educar mas a las personas sobre este virus para que de esta forma se pueda tomar más medidas de bioseguridad para resguardar la integridad de las personas y evitar futuros contagios y de rebrotes del coronavirus.
Quito	Quito	20	Masculino	UTN	Ingenieria en Agroindustrias	1-3	SARS-COV-2	De origen natural	Una entidad viva	51 - 100	Verdadero	Verdadero	Verdadero	Verdadero	Verdadero	Falso	Verdadero	Falso	Verdadero	Verdadero	Verdadero	Verdadero	Verdadero	Verdadero	Falso	Verdadero	Falso	Falso	No estoy seguro/a	Falso	Verdadero	Falso	Verdadero	Verdadero
Otavalo	Otavalo	25	Masculino	UTN	Carrera de Agroindustria	1-3	SARS-COV-2	Creado en laboratorio	Un complot mediático	41 - 50	Verdadero	Verdadero	Verdadero	Verdadero	No estoy seguro/a	No estoy seguro/a	Verdadero	No estoy seguro/a	Verdadero	Verdadero	Verdadero	Verdadero	Verdadero	No estoy seguro/a	No estoy seguro/a	Verdadero	No estoy seguro/a	No estoy seguro/a	Falso	No estoy seguro/a	Verdadero	Falso	Verdadero	Verdadero	Deben evitar aglomeraciones y tratar de no salir de casa
Carchi- Cantón Huaca	Huaca	20	Femenino	UTN	Ingeniería Agroindustrial	1-3	SARS-COV-2	De origen natural	Una entidad viva	31 - 40	No estoy seguro/a	Verdadero	Verdadero	Verdadero	Falso	No estoy seguro/a	Verdadero	Falso	Verdadero	Verdadero	Verdadero	Verdadero	Verdadero	Verdadero	Falso	Verdadero	Falso	No estoy seguro/a	No estoy seguro/a	Falso	Verdadero	verdadero	Falso	Verdadero
Ibarra	Ibarra	20	Femenino	UTN	Ingeniería Agroindustrial	1-3	No estoy seguro/a	Creado en laboratorio	No estoy seguro/a	31 - 40	Verdadero	No estoy seguro/a	Verdadero	Verdadero	Falso	No estoy seguro/a	Verdadero	Falso	Verdadero	Verdadero	Verdadero	Verdadero	Verdadero	Verdadero	No estoy seguro/a	No estoy seguro/a	No estoy seguro/a	Falso	No estoy seguro/a	Verdadero	Verdadero	Falso	Falso	Verdadero	Muy interesante
Pimampiro	Pimampiro	20	Femenino	UTN	Ingenieria Agroindustrial	1-3	COVID-19	Creado en laboratorio	Un complot mediático	No estoy seguro/a	Falso	Verdadero	Verdadero	Verdadero	Verdadero	Falso	Verdadero	Verdadero	Verdadero	Verdadero	Verdadero	Verdadero	Verdadero	Verdadero	No estoy seguro/a	No estoy seguro/a	Verdadero	Falso	No estoy seguro/a	Verdadero	No estoy seguro/a	Falso	Falso	Verdadero	Me parece una excelente idea el hacer un cuestionario sobre el covid-19 ya que haci podremos saber si la información que sabemos es correcta o incorrecta.
Ibarra	Ibarra	19	Femenino	UTN	Ingeniería Agroindustrial	1-3	No estoy seguro/a	De origen natural	Una entidad viva	51 - 100	Verdadero	Verdadero	Verdadero	Verdadero	Falso	Falso	Verdadero	Verdadero	Verdadero	Verdadero	Verdadero	Verdadero	Verdadero	Falso	Falso	Falso	No estoy seguro/a	Falso	Falso	Falso	Falso	Falso	Verdadero	Verdadero
Ibarra	Ibarra	19	Femenino	UTN	Ingeniería Agroindustrial	1-3	SARS-COV-2	De origen natural	Un compuesto químico	21 - 30	Falso	Verdadero	Verdadero	Verdadero	Falso	Falso	Verdadero	Verdadero	Verdadero	Verdadero	Verdadero	Verdadero	Verdadero	Verdadero	Verdadero	Verdadero	Falso	Falso	Falso	Falso	Verdadero	Falso	Falso	Verdadero
Cayambe	Cayambe	21	Masculino	UTN	Ingeniería Agroindustrial	1-3	SARS-COV-2	Creado en laboratorio	No estoy seguro/a	1 - 10	Verdadero	Verdadero	Verdadero	Verdadero	Falso	Falso	Verdadero	Falso	Verdadero	Verdadero	Verdadero	Verdadero	Verdadero	Verdadero	Falso	Verdadero	Verdadero	Falso	Falso	Verdadero	Verdadero	Falso	Falso	Verdadero
Ibarra	Esmeraldas	20	Femenino	UTN	Agroindustrias	1-3	SARS-COV-2	No estoy seguro/a	No estoy seguro/a	41 - 50	No estoy seguro/a	Falso	Verdadero	Verdadero	No estoy seguro/a	No estoy seguro/a	Verdadero	No estoy seguro/a	Verdadero	Verdadero	Verdadero	Verdadero	Verdadero	Verdadero	Verdadero	No estoy seguro/a	No estoy seguro/a	Falso	No estoy seguro/a	No estoy seguro/a	No estoy seguro/a	Falso	Falso	Verdadero
Otavalo	Otavalo	18	Femenino	UTN	Agroindustrias	1-3	SARS-COV-2	Creado en laboratorio	Un compuesto químico	1 - 10	Falso	Verdadero	Verdadero	Verdadero	No estoy seguro/a	Falso	Verdadero	No estoy seguro/a	Verdadero	Verdadero	Verdadero	Verdadero	Verdadero	Verdadero	No estoy seguro/a	No estoy seguro/a	Verdadero	Falso	Falso	Verdadero	Verdadero	Falso	Falso	Verdadero	Es una buena encuesta con una estructura y temas que no se salen del contexto y que nosotros deberíamos conocer
Puyo	Puyo	21	Masculino	UTN	Ingeniería agroindustrial	1-3	SARS-COV-2	Creado en laboratorio	Un compuesto químico	11 - 20	Verdadero	Verdadero	Verdadero	Verdadero	Falso	Falso	Verdadero	No estoy seguro/a	Verdadero	Falso	Verdadero	Verdadero	Verdadero	Verdadero	No estoy seguro/a	Falso	No estoy seguro/a	Falso	Falso	Verdadero	Verdadero	Falso	Falso	Verdadero
Pimampiro	Pimampiro	19	Femenino	UDLASI	Comunicación Social	1-3	No estoy seguro/a	Creado en laboratorio	No estoy seguro/a	21 - 30	No estoy seguro/a	Verdadero	Verdadero	Verdadero	No estoy seguro/a	Falso	No estoy seguro/a	Falso	Verdadero	Verdadero	Verdadero	Verdadero	Verdadero	Verdadero	No estoy seguro/a	No estoy seguro/a	No estoy seguro/a	Falso	No estoy seguro/a	Verdadero	No estoy seguro/a	Falso	Falso	Verdadero
quito	QUITO	20	Femenino	UTN	Ingenieria en agroindustrias	1-3	SARS-COV-2	Creado en laboratorio	Una entidad viva	No estoy seguro/a	Verdadero	Verdadero	Verdadero	Verdadero	Falso	Falso	Verdadero	Falso	Verdadero	Verdadero	Verdadero	Verdadero	Verdadero	Verdadero	No estoy seguro/a	No estoy seguro/a	Verdadero	Falso	Falso	No estoy seguro/a	Verdadero	Falso	Verdadero	Verdadero
Quito	Quito	43	Masculino	UCE	Veterinaria	9 en adelante	SARS-COV-2	De origen natural	No estoy seguro/a	1 - 10	No estoy seguro/a	Verdadero	Verdadero	Verdadero	No estoy seguro/a	Falso	Verdadero	Verdadero	Verdadero	Verdadero	Verdadero	Verdadero	Verdadero	Verdadero	Falso	Verdadero	Verdadero	Falso	Falso	No estoy seguro/a	Verdadero	No estoy seguro/a	Falso	Verdadero
Otavalo	Otavalo	20	Femenino	UTN	Agroindustrias	1-3	SARS-COV-2	Creado en laboratorio	Un complot mediático	31 - 40	Verdadero	Verdadero	Verdadero	Verdadero	Falso	Falso	Verdadero	No estoy seguro/a	Verdadero	Verdadero	Verdadero	Verdadero	Verdadero	Verdadero	No estoy seguro/a	No estoy seguro/a	Verdadero	Verdadero	verdadero	Verdadero	Falso	Falso	Verdadero	Verdadero	Mi recomendación para todos es que seamos mas responsables y nos cuidemos mucho para evitar la propagación del virus.
Cotacachi	Ibarra	20	Masculino	UTN	Ingeniería Agroindustrial	1-3	No estoy seguro/a	De origen natural	No estoy seguro/a	No estoy seguro/a	No estoy seguro/a	Verdadero	Verdadero	Verdadero	Falso	No estoy seguro/a	Verdadero	Falso	Verdadero	Verdadero	Verdadero	Verdadero	No estoy seguro/a	No estoy seguro/a	No estoy seguro/a	No estoy seguro/a	Verdadero	Verdadero	verdadero	No estoy seguro/a	Verdadero	Falso	Falso	Verdadero	Yo opino que lo más importante para reducir el número de contagiados es el lavado de manos, uso de mascarillas y distanciamiento social.
Cayambe	Cayambe	20	Masculino	UTN	Ingenieria Agroindustrial	1-3	SARS-COV-2	Creado en laboratorio	Una entidad viva	11 - 20	Falso	Verdadero	Verdadero	Verdadero	Falso	Falso	Verdadero	Verdadero	Verdadero	Verdadero	Verdadero	Verdadero	Verdadero	Verdadero	Verdadero	Verdadero	Verdadero	Verdadero	No estoy seguro/a	Verdadero	Falso	Falso	Falso	Verdadero	Yo creo que es muy factible e importante a su vez, conocer y dar a conocer sobre a esta terrible pandemia que asecha a nuestro pais y el mundo, conocer de esto nos hace mas cuidadosos y responsables con nuestra salud y la salud de los nuestros. Responsable en sentido de cuidarnos y protegernos para que no se propage mas esta enfermedad y asi ayudarnos todos. Y asi poder salir victoriosos de esta …
Cayambe	Cayambe	24	Masculino	UTN	Agroindustrias	1-3	SARS-COV-2	De origen natural	No estoy seguro/a	1 - 10	Verdadero	Verdadero	Verdadero	Verdadero	Falso	Falso	Verdadero	Verdadero	Verdadero	Verdadero	Verdadero	Verdadero	Falso	Verdadero	Verdadero	Verdadero	Verdadero	Falso	Falso	Falso	Verdadero	No estoy seguro/a	Falso	Verdadero
Tabacundo	Tabacundo	20	Femenino	UTN	Agroindustrias	1-3	SARS-COV-2	Creado en laboratorio	No estoy seguro/a	41 - 50	No estoy seguro/a	Verdadero	Verdadero	Verdadero	No estoy seguro/a	No estoy seguro/a	Verdadero	No estoy seguro/a	Verdadero	Verdadero	Verdadero	Verdadero	Verdadero	Verdadero	No estoy seguro/a	Falso	No estoy seguro/a	Falso	No estoy seguro/a	Verdadero	Falso	Falso	Verdadero	Verdadero	Es necesario conocer más sobre este virus que afecta a todos
Ibarra	Ibarra	19	Masculino	UTN	Agroindustrias	1-3	SARS-COV-2	De origen natural	No estoy seguro/a	1 - 10	Verdadero	Verdadero	Verdadero	Verdadero	No estoy seguro/a	Falso	Verdadero	Falso	Verdadero	Verdadero	Verdadero	Verdadero	Verdadero	Verdadero	No estoy seguro/a	Falso	Verdadero	Falso	verdadero	No estoy seguro/a	No estoy seguro/a	Falso	Falso	Verdadero
Cayambe	Cayambe	21	Masculino	Universidad Tecnica del Norte	Ingenieria Agroindustrial	1-3	SARS-COV-2	Creado en laboratorio	Una entidad viva	No estoy seguro/a	Verdadero	Verdadero	Falso	Verdadero	Falso	Falso	Verdadero	No estoy seguro/a	Verdadero	Verdadero	Verdadero	Falso	Verdadero	Verdadero	Falso	Verdadero	Verdadero	Falso	Falso	Falso	Verdadero	Falso	Falso	Verdadero
Atuntaqui	Atuntaqui	23	Femenino	UTN	Ingeniería Agroindustrial	1-3	SARS-COV-2	De origen natural	Una entidad viva	No estoy seguro/a	No estoy seguro/a	Verdadero	Verdadero	Verdadero	No estoy seguro/a	Falso	Verdadero	Falso	No estoy seguro/a	Verdadero	Verdadero	Verdadero	Verdadero	Verdadero	Falso	No estoy seguro/a	Falso	Falso	Falso	Verdadero	No estoy seguro/a	Falso	Falso	Verdadero
Ibarra	Ibarra	20	Masculino	UTN	Ing. Agroindustrial	1-3	No estoy seguro/a	Creado en laboratorio	Un complot mediático	No estoy seguro/a	No estoy seguro/a	Verdadero	Verdadero	Verdadero	No estoy seguro/a	Falso	Verdadero	Falso	Verdadero	Verdadero	Verdadero	Verdadero	Verdadero	Verdadero	No estoy seguro/a	No estoy seguro/a	No estoy seguro/a	Falso	verdadero	Verdadero	Verdadero	Falso	Falso	Verdadero	Esta correcto este tipo de encuestas para saber que nivel de conocimiento tienen las personas acerca del covid y las medidas necesarias para conbatirlas
Tabacundo	Tabacundo	23	Masculino	Universidad Técnica del Norte	Ingeniería Agroindustrial	1-3	SARS-COV-2	De origen natural	No estoy seguro/a	No estoy seguro/a	No estoy seguro/a	Verdadero	Verdadero	Verdadero	Falso	Falso	Verdadero	Verdadero	Verdadero	Verdadero	Verdadero	Verdadero	Verdadero	Verdadero	No estoy seguro/a	No estoy seguro/a	Verdadero	Falso	Falso	Falso	Verdadero	Falso	Falso	Verdadero	Me parece una iniciativa bastante interesante para medir el nivel de conocimiento que poseen las personas frente a esta enfermedad.
Otavalo	Otavalo	23	Masculino	Utn	Ingeniería agroindustrial	1-3	No estoy seguro/a	Creado en laboratorio	Una entidad viva	No estoy seguro/a	Verdadero	Verdadero	Verdadero	Verdadero	No estoy seguro/a	Falso	Verdadero	Verdadero	Verdadero	Verdadero	Verdadero	Verdadero	Verdadero	Verdadero	Verdadero	Verdadero	No estoy seguro/a	Verdadero	Falso	No estoy seguro/a	No estoy seguro/a	Falso	Falso	Verdadero	El covid 19 es un gen mortal pero no todas las personas pueden tener síntomas graves por el echo de ser portadores del virus ellos pueden tener una leve gripe algo no para preocuparse a las personas a las que esa persona contagie si va a presentar los síntomas graves del covid 19
Ibarra	Tuquerres	27	Femenino	UTN	Ingeniería en Agroindustrias	1-3	SARS-COV-2	De origen natural	Un compuesto químico	No estoy seguro/a	Verdadero	Verdadero	Verdadero	Verdadero	Falso	Falso	Verdadero	Falso	Verdadero	Falso	Verdadero	Verdadero	Verdadero	Verdadero	Falso	No estoy seguro/a	Verdadero	Falso	Falso	Falso	Verdadero	Falso	Falso	Verdadero
Ibarra	Ibarra	21	Femenino	UTN	Agroindustrias	1-3	SARS-COV-2	De origen natural	No estoy seguro/a	1 - 10	Falso	Verdadero	Verdadero	Verdadero	Falso	Falso	Verdadero	Verdadero	Verdadero	Verdadero	Verdadero	Verdadero	Verdadero	Verdadero	Falso	No estoy seguro/a	Verdadero	Falso	No estoy seguro/a	Falso	Verdadero	Falso	Falso	Verdadero	Me pareció muy interesante la encuesta
Atuntaqui	Atuntaqui	19	Femenino	UTN	Agroindustria	1-3	COVID-19	De origen natural	No estoy seguro/a	No estoy seguro/a	Verdadero	Verdadero	Verdadero	Verdadero	No estoy seguro/a	Falso	Verdadero	Falso	Verdadero	Verdadero	Verdadero	Verdadero	Verdadero	Verdadero	No estoy seguro/a	Verdadero	Verdadero	Falso	Falso	Verdadero	Falso	Falso	Falso	Verdadero
Otovalo	Otavalo	23	Femenino	UTN	Ingenieria Agroindustrial	1-3	COVID-19	Creado en laboratorio	No estoy seguro/a	11 - 20	Falso	Verdadero	Verdadero	Verdadero	Falso	Falso	Verdadero	Falso	Verdadero	Verdadero	Verdadero	Verdadero	Verdadero	Verdadero	Falso	Verdadero	No estoy seguro/a	Falso	Falso	Falso	Verdadero	Falso	Falso	Verdadero	Es una encuesta muy necesaria para poder saber los conocimiento sobre este tema.
Quito	Quito	22	Masculino	UCE	Computación	4-6	SARS-COV-2	De origen natural	Una entidad viva	11 - 20	Falso	Verdadero	Verdadero	Verdadero	No estoy seguro/a	Falso	Verdadero	Verdadero	Verdadero	Verdadero	Verdadero	Verdadero	Verdadero	Verdadero	No estoy seguro/a	No estoy seguro/a	Verdadero	Falso	Falso	No estoy seguro/a	Falso	Falso	Falso	Verdadero
Quito	Quito	23	Masculino	UCE	Ingeniería en Informática	4-6	COVID-19	De origen natural	Una entidad viva	1 - 10	Verdadero	No estoy seguro/a	Verdadero	Verdadero	Falso	Falso	Verdadero	Verdadero	Verdadero	Verdadero	Verdadero	Verdadero	Verdadero	Verdadero	No estoy seguro/a	Verdadero	No estoy seguro/a	Falso	Falso	Falso	Verdadero	Falso	Falso	Verdadero
Quito	Quito	20	Femenino	UCE	Ingeniería civil	4-6	SARS-COV-2	De origen natural	No estoy seguro/a	1 - 10	Verdadero	Verdadero	Verdadero	Verdadero	No estoy seguro/a	Falso	Verdadero	Falso	Verdadero	Verdadero	Verdadero	Verdadero	Verdadero	Verdadero	Falso	No estoy seguro/a	No estoy seguro/a	Falso	Falso	Verdadero	Verdadero	Falso	Falso	Verdadero
Quito	Quito	19	Masculino	UCE	Ingeniería Civil	1-3	SARS-COV-2	De origen natural	Un compuesto químico	1 - 10	Falso	Verdadero	Verdadero	Verdadero	Verdadero	Falso	Verdadero	Falso	Verdadero	Verdadero	Verdadero	Verdadero	Verdadero	Verdadero	No estoy seguro/a	Verdadero	Verdadero	Falso	Falso	No estoy seguro/a	Verdadero	Falso	Verdadero	Verdadero
Quito	Quito	21	Masculino	UCE	Ingeniería en Petróleos	7-9	SARS-COV-2	Creado en laboratorio	Un compuesto químico	1 - 10	Verdadero	Verdadero	Verdadero	Verdadero	Falso	Falso	Verdadero	Verdadero	Verdadero	Verdadero	Verdadero	Verdadero	Verdadero	Verdadero	No estoy seguro/a	Verdadero	Verdadero	Falso	No estoy seguro/a	Falso	Verdadero	Falso	Falso	Verdadero
Quito	Quito	21	Femenino	UCE	Medicina	4-6	SARS-COV-2	De origen natural	No estoy seguro/a	1 - 10	Verdadero	Verdadero	Verdadero	Verdadero	Falso	Falso	Verdadero	Verdadero	Verdadero	Verdadero	Verdadero	Verdadero	Verdadero	Verdadero	Falso	Verdadero	Verdadero	Falso	Falso	Falso	Falso	Falso	No estoy seguro/a	Verdadero
Quito	Quito	21	Masculino	UCE	Odontología	7-9	SARS-COV-2	De origen natural	Una entidad viva	1 - 10	Verdadero	Verdadero	Verdadero	Verdadero	Falso	Falso	Verdadero	Verdadero	Verdadero	Verdadero	Verdadero	Verdadero	Verdadero	Verdadero	Falso	Verdadero	Verdadero	Falso	Falso	Falso	Verdadero	Falso	Falso	Verdadero
Quito	Quito	20	Masculino	UCE	Ingeniería en minas	1-3	SARS-COV-2	De origen natural	Una entidad viva	No estoy seguro/a	No estoy seguro/a	Verdadero	Verdadero	Verdadero	Falso	Falso	No estoy seguro/a	Verdadero	Verdadero	Verdadero	Verdadero	Verdadero	Verdadero	Verdadero	Falso	Falso	No estoy seguro/a	Falso	Falso	Verdadero	Verdadero	Falso	Falso	Verdadero
Quito	Quito	19	Masculino	UCE	Computación	1-3	SARS-COV-2	De origen natural	Una entidad viva	11 - 20	Falso	Verdadero	No estoy seguro/a	Verdadero	Verdadero	Falso	Verdadero	Falso	Verdadero	Verdadero	Verdadero	Verdadero	Verdadero	Verdadero	Falso	Verdadero	Verdadero	Falso	Falso	No estoy seguro/a	No estoy seguro/a	Falso	Falso	Verdadero
Quito	Quito	23	Masculino	UCE	Psicología	1-3	SARS-COV-2	Creado en laboratorio	Un compuesto químico	1 - 10	Falso	Verdadero	Verdadero	Verdadero	Verdadero	Falso	Verdadero	Verdadero	Verdadero	Verdadero	Verdadero	Verdadero	Verdadero	Verdadero	Falso	Verdadero	Verdadero	Verdadero	Falso	Falso	Verdadero	Falso	Falso	Verdadero
quito	quito	20	Masculino	UCE	Ingenieria en Sistemas de Informacion	1-3	SARS-COV-2	De origen natural	Una entidad viva	No estoy seguro/a	Verdadero	Verdadero	Verdadero	Verdadero	Falso	Falso	Verdadero	Verdadero	Verdadero	Verdadero	Verdadero	Verdadero	Verdadero	Verdadero	Falso	Falso	Verdadero	Falso	Falso	Verdadero	Verdadero	Falso	Falso	Verdadero
Quito	Quito	21	Femenino	UCE	Bioquímica y Farmacia	1-3	SARS-COV-2	De origen natural	No estoy seguro/a	11 - 20	Verdadero	Verdadero	Verdadero	Verdadero	Falso	Falso	Verdadero	Falso	Verdadero	Verdadero	Verdadero	Verdadero	Verdadero	Verdadero	Falso	No estoy seguro/a	Verdadero	Falso	Falso	No estoy seguro/a	Falso	Falso	Falso	Verdadero
QUITO	QUITO	30	Masculino	UCE	PEDAGOGÍA EN QUÍMICA Y BIOLOGÍA	4-6	SARS-COV-2	Creado en laboratorio	Un compuesto químico	41 - 50	No estoy seguro/a	Verdadero	Verdadero	Verdadero	Falso	Falso	Verdadero	Falso	Verdadero	Verdadero	Verdadero	Verdadero	Verdadero	Verdadero	No estoy seguro/a	No estoy seguro/a	No estoy seguro/a	Falso	Falso	No estoy seguro/a	Verdadero	Falso	Falso	No estoy seguro/a	Adjuntar un link o links con información confiable sobre el covid 19
Quito	Quito	23	Femenino	UCE	Bioquímica Clínica	7-9	SARS-COV-2	De origen natural	Una entidad viva	1 - 10	Verdadero	Falso	Verdadero	Verdadero	Falso	Falso	Verdadero	Falso	Verdadero	Verdadero	Verdadero	Verdadero	Verdadero	Verdadero	Falso	Verdadero	Verdadero	Falso	Falso	Falso	Verdadero	Falso	Falso	Verdadero
Quito	Quito	25	Masculino	UCE	Ingeniería Civil	7-9	SARS-COV-2	De origen natural	No estoy seguro/a	1 - 10	Verdadero	Verdadero	Verdadero	Verdadero	Falso	Falso	Verdadero	Falso	Verdadero	Verdadero	Falso	Verdadero	Verdadero	Verdadero	No estoy seguro/a	No estoy seguro/a	Verdadero	Falso	No estoy seguro/a	No estoy seguro/a	Verdadero	Falso	Falso	Verdadero
Quito	Quito	20	Masculino	UCE	Estadística	1-3	No estoy seguro/a	Creado en laboratorio	Una entidad viva	31 - 40	Verdadero	Verdadero	Verdadero	Verdadero	No estoy seguro/a	Falso	Falso	Verdadero	Verdadero	Verdadero	Verdadero	Verdadero	Verdadero	Verdadero	Falso	No estoy seguro/a	Falso	Falso	Falso	Verdadero	Falso	verdadero	Falso	Verdadero
Quito	Quito	24	Masculino	UCE	Ingeniería Química	7-9	SARS-COV-2	De origen natural	Una entidad viva	1 - 10	Verdadero	Verdadero	Falso	Verdadero	No estoy seguro/a	Falso	Verdadero	Falso	Verdadero	Verdadero	Verdadero	Verdadero	Verdadero	Verdadero	No estoy seguro/a	Verdadero	Verdadero	Falso	Falso	No estoy seguro/a	Falso	Falso	Falso	Verdadero
Quito	Quito	19	Femenino	UCE	Contabilidad y auditoría	1-3	SARS-COV-2	Creado en laboratorio	Una entidad viva	No estoy seguro/a	No estoy seguro/a	Verdadero	Verdadero	Verdadero	Falso	Falso	Verdadero	Falso	Verdadero	Verdadero	Verdadero	Verdadero	Verdadero	Verdadero	No estoy seguro/a	No estoy seguro/a	Verdadero	Falso	Falso	Verdadero	Verdadero	Falso	Falso	Verdadero
Quito	Quito	21	Femenino	UCE	Agronomía	1-3	SARS-COV-2	De origen natural	Un complot mediático	11 - 20	Falso	Verdadero	Verdadero	Verdadero	Falso	Falso	Verdadero	Falso	Verdadero	Verdadero	Verdadero	Verdadero	Verdadero	Verdadero	Verdadero	No estoy seguro/a	Verdadero	Falso	No estoy seguro/a	Falso	Verdadero	Falso	Falso	Verdadero	La policía debe tomar medidas sobre personas que realizan reuniones ya que últimamente se han realizado fiestas y los contagios han aumentado.
Quito	Quito	24	Femenino	UCE	Medicina	9 en adelante	SARS-COV-2	De origen natural	No estoy seguro/a	21 - 30	Verdadero	Verdadero	Verdadero	Verdadero	Falso	Falso	Verdadero	Falso	Verdadero	Verdadero	Verdadero	Verdadero	Verdadero	Verdadero	Falso	Verdadero	Verdadero	Falso	Falso	Falso	Verdadero	Falso	Falso	Verdadero
Quito	Quito	21	Otro	UCE	Pedagogía en Informática	1-3	COVID-19	Creado en laboratorio	Una entidad viva	No estoy seguro/a	Verdadero	Verdadero	Verdadero	Verdadero	Falso	Falso	Verdadero	Verdadero	Verdadero	Verdadero	Verdadero	Verdadero	Verdadero	Verdadero	Falso	No estoy seguro/a	No estoy seguro/a	Falso	Falso	No estoy seguro/a	Verdadero	Falso	Falso	Verdadero
Quito	Otavalo	25	Femenino	UCE	Ingenieria Civil	7-9	SARS-COV-2	De origen natural	Una entidad viva	11 - 20	Falso	Verdadero	Verdadero	Verdadero	Falso	Falso	Verdadero	Verdadero	Verdadero	Verdadero	Verdadero	Verdadero	Verdadero	Verdadero	No estoy seguro/a	No estoy seguro/a	Falso	Falso	Falso	Falso	No estoy seguro/a	verdadero	Verdadero	Verdadero
Quito	Quito	24	Femenino	UCE	Bioquímica Clínica	7-9	SARS-COV-2	De origen natural	Una entidad viva	No estoy seguro/a	Verdadero	Verdadero	Verdadero	Verdadero	Falso	Falso	Verdadero	Verdadero	Verdadero	Verdadero	Verdadero	Verdadero	Verdadero	Verdadero	Falso	Verdadero	Verdadero	Verdadero	Falso	Verdadero	Verdadero	Falso	Falso	Verdadero
Quito	Loja	19	Masculino	UCE	Geología	1-3	SARS-COV-2	De origen natural	Una entidad viva	31 - 40	Verdadero	Verdadero	Verdadero	Verdadero	Falso	Falso	Verdadero	Falso	Verdadero	Verdadero	Verdadero	Verdadero	Verdadero	Verdadero	Verdadero	Falso	Verdadero	Verdadero	verdadero	Falso	Verdadero	Falso	Falso	Verdadero
Quito	Quito	25	Femenino	UCE	Pedagogía de Idiomas Nacionales y Extranjeros	1-3	COVID-19	Creado en laboratorio	Un compuesto químico	No estoy seguro/a	No estoy seguro/a	Verdadero	Verdadero	Verdadero	Falso	Falso	Verdadero	Falso	Verdadero	Verdadero	Falso	Verdadero	No estoy seguro/a	Verdadero	No estoy seguro/a	No estoy seguro/a	Falso	Falso	No estoy seguro/a	Falso	Verdadero	Falso	Falso	Verdadero
Quito	Quito	24	Femenino	UCE	Química de Alimentos	4-6	SARS-COV-2	No estoy seguro/a	Una entidad viva	No estoy seguro/a	No estoy seguro/a	Verdadero	Verdadero	Verdadero	Falso	Falso	Verdadero	Falso	Verdadero	Verdadero	Verdadero	Verdadero	Falso	Verdadero	Falso	Verdadero	Falso	Falso	No estoy seguro/a	Verdadero	Verdadero	Falso	Falso	Verdadero
Quito	Quito	24	Masculino	UCE	Ingeniería Ambiental	4-6	SARS-COV-2	De origen natural	Una entidad viva	1 - 10	No estoy seguro/a	Verdadero	Verdadero	Verdadero	Verdadero	Falso	Verdadero	Verdadero	Verdadero	Verdadero	Verdadero	Verdadero	Verdadero	Verdadero	Falso	Verdadero	Verdadero	No estoy seguro/a	Falso	No estoy seguro/a	Verdadero	Falso	Falso	Verdadero
Quito	Quito	23	Masculino	UCE	Bioquímica Clínica	9 en adelante	SARS-COV-2	De origen natural	Una entidad viva	1 - 10	No estoy seguro/a	Verdadero	Verdadero	Verdadero	Falso	Falso	Verdadero	Verdadero	Verdadero	Verdadero	Verdadero	Verdadero	Verdadero	Verdadero	Falso	Verdadero	Verdadero	Falso	Falso	Falso	Verdadero	Falso	Falso	Verdadero	En la pregunta de si el Covid-19 lo considero un organismo vivo no me quedo tan claro ya que los virus en si no son considerados organismos vivos.
Quito	Quito	20	Masculino	UCE	Bioquímica & Farmacia	1-3	SARS-COV-2	De origen natural	Una entidad viva	1 - 10	Falso	Verdadero	Verdadero	Verdadero	Falso	Falso	Verdadero	Falso	Falso	Verdadero	Verdadero	Verdadero	Verdadero	Verdadero	Falso	Verdadero	Verdadero	Verdadero	Falso	Falso	Verdadero	Falso	Falso	Verdadero
Quito	Cuenca	22	Masculino	UCE	Bioquímica Clínica	7-9	SARS-COV-2	De origen natural	No estoy seguro/a	1 - 10	Verdadero	Verdadero	Verdadero	Verdadero	Falso	Falso	Verdadero	No estoy seguro/a	Verdadero	Verdadero	Verdadero	Verdadero	Verdadero	Verdadero	Falso	Verdadero	Verdadero	Falso	Falso	Falso	Falso	Falso	Falso	Verdadero	En la pregunta de que si el agente causal del covid-19 se considera una entidad viva, un compuesto quimico o un complot, falta la opción para un virus ya que no podría incluirse en ninguna de estas categorías ya que la definición de virus es mucho mas compleja.
Ibarra	Ibarra	28	Femenino	UCE	Ambiental	1-3	SARS-COV-2	De origen natural	Una entidad viva	1 - 10	Verdadero	Verdadero	Verdadero	Verdadero	Falso	Falso	Verdadero	Verdadero	Verdadero	Verdadero	Verdadero	Verdadero	Verdadero	Verdadero	Verdadero	Verdadero	Verdadero	Falso	No estoy seguro/a	Falso	Falso	Falso	Verdadero	Verdadero	Interesantes preguntas
Quito	Latacunga	20	Femenino	UCE	Química rediseño	1-3	SARS-COV-2	Creado en laboratorio	Un complot mediático	1 - 10	Verdadero	Verdadero	Verdadero	Verdadero	Falso	Falso	Verdadero	Falso	Verdadero	Verdadero	Verdadero	Verdadero	Verdadero	Verdadero	Verdadero	Verdadero	Falso	Falso	Falso	Verdadero	No estoy seguro/a	Falso	Falso	Verdadero	Me parece un estudio bastante interesante, puesto que las personas debemos estar más informadas sobre la situación actual en la que se vive y de esta forma dejar la ignorancia.
Quito	Quito	18	Femenino	UCE	Pedagogía de las ciencias experimentales Química y Biología	1-3	SARS-COV-2	Creado en laboratorio	No estoy seguro/a	51 - 100	No estoy seguro/a	Verdadero	Verdadero	Verdadero	Verdadero	Falso	Verdadero	No estoy seguro/a	Verdadero	Verdadero	Verdadero	Verdadero	Verdadero	Verdadero	No estoy seguro/a	Verdadero	Falso	Falso	Falso	Verdadero	No estoy seguro/a	Falso	Falso	Verdadero
Quito	Quito	24	Femenino	UCE	Psicologia infantil y psicorrehabiliración	9 en adelante	SARS-COV-2	De origen natural	Una entidad viva	1 - 10	Verdadero	Verdadero	Verdadero	Verdadero	Falso	Falso	Verdadero	Falso	Verdadero	Verdadero	Verdadero	Verdadero	Verdadero	Verdadero	Verdadero	Verdadero	Falso	Falso	Falso	Falso	Verdadero	Falso	Falso	Verdadero
Otavalo	Otavalo	20	Femenino	Universidad Técnica del Norte	Agroindustria	1-3	SARS-COV-2	De origen natural	Un compuesto químico	21 - 30	Falso	Verdadero	No estoy seguro/a	Verdadero	Falso	Falso	Verdadero	Falso	Verdadero	Verdadero	Verdadero	Verdadero	Falso	Verdadero	Verdadero	Verdadero	No estoy seguro/a	Falso	Falso	No estoy seguro/a	Verdadero	Falso	Falso	Verdadero
Quito	Ambato	22	Femenino	UCE	Plurilingüe	7-9	No estoy seguro/a	De origen natural	Una entidad viva	No estoy seguro/a	Verdadero	Verdadero	Verdadero	Verdadero	No estoy seguro/a	Falso	Verdadero	No estoy seguro/a	Verdadero	Verdadero	Verdadero	Verdadero	Verdadero	Verdadero	No estoy seguro/a	Verdadero	Falso	Falso	Falso	Falso	Verdadero	Falso	Falso	Verdadero
Quito	Quito	25	Femenino	UCE	Psicología Infantil y Psicorrehabilitación	7-9	SARS-COV-2	Creado en laboratorio	No estoy seguro/a	No estoy seguro/a	No estoy seguro/a	Verdadero	No estoy seguro/a	Verdadero	Falso	Falso	Verdadero	No estoy seguro/a	Verdadero	Verdadero	Verdadero	Verdadero	Verdadero	Verdadero	No estoy seguro/a	Verdadero	Verdadero	Falso	Falso	No estoy seguro/a	Verdadero	Falso	No estoy seguro/a	Verdadero
Quito	Quito	28	Masculino	UCE	Economía	4-6	SARS-COV-2	De origen natural	Una entidad viva	1 - 10	No estoy seguro/a	Verdadero	Verdadero	Verdadero	Falso	Falso	Verdadero	Verdadero	Falso	Verdadero	Verdadero	Verdadero	Verdadero	Verdadero	No estoy seguro/a	No estoy seguro/a	Verdadero	Falso	Falso	Falso	Verdadero	verdadero	Falso	Verdadero
QUITO	QUITO	20	Masculino	UCE	Medicina Veterinaria	1-3	SARS-COV-2	De origen natural	Un compuesto químico	1 - 10	Verdadero	Verdadero	Verdadero	Verdadero	No estoy seguro/a	Falso	Verdadero	Falso	Verdadero	Verdadero	Verdadero	Verdadero	Verdadero	Verdadero	Falso	Verdadero	Verdadero	Falso	Falso	Falso	Falso	Falso	Falso	Verdadero
Tulcán	Popayan - Colombia	22	Masculino	UTN	Ing Agroindustrial	1-3	COVID-19	Creado en laboratorio	Un complot mediático	1 - 10	Verdadero	Verdadero	Verdadero	Verdadero	Falso	Verdadero	Verdadero	Verdadero	Verdadero	Verdadero	Verdadero	Verdadero	Verdadero	Verdadero	Verdadero	Verdadero	Verdadero	Verdadero	No estoy seguro/a	Verdadero	Verdadero	Falso	Verdadero	Verdadero	Devemos cuidar la vida de nosotros y de los demas por que no devemls ser tan iresponsables de aruinar las vida de uno y de los demas Cuidate ✌️❤️
Quito	Quito	24	Masculino	UCE	Bioquímica y Farmacia	1-3	SARS-COV-2	De origen natural	Una entidad viva	1 - 10	Verdadero	Verdadero	Verdadero	Verdadero	Falso	Falso	Verdadero	Falso	Verdadero	Verdadero	Verdadero	Verdadero	Verdadero	Verdadero	Falso	Verdadero	Verdadero	Falso	Falso	Falso	Verdadero	Falso	Falso	Verdadero
Cotacachi- Comunidad El Cercado	Cotacachi	29	Masculino	UCE	Derecho	9 en adelante	SARS-COV-2	Creado en laboratorio	Un compuesto químico	1 - 10	Falso	Verdadero	No estoy seguro/a	Verdadero	Falso	Falso	Verdadero	Falso	Verdadero	Verdadero	Verdadero	Verdadero	Verdadero	Verdadero	No estoy seguro/a	Verdadero	Verdadero	Falso	No estoy seguro/a	Verdadero	Falso	Falso	Falso	Verdadero	Muchas gente de las comunidades indígenas hemos utilizado las medicinas naturales andinas o medicina alternativa (jingibre, ajo, naranja, limón, hojas de clavel,etc. Hemos salido del COVID positivo a negativo. Historia real de mi persona . El aislamiento si es necesario.. Saludos Cordiales
Quito	Saquisilí	49	Femenino	UCE	Contabilidad y Auditoria	7-9	No estoy seguro/a	No estoy seguro/a	No estoy seguro/a	11 - 20	No estoy seguro/a	Verdadero	Verdadero	Verdadero	No estoy seguro/a	Falso	Verdadero	No estoy seguro/a	Verdadero	Verdadero	Verdadero	Verdadero	Verdadero	Verdadero	No estoy seguro/a	No estoy seguro/a	Verdadero	Falso	No estoy seguro/a	Verdadero	No estoy seguro/a	Falso	Falso	Verdadero	No tengo claro la información del comportamiento del virus de como se origino, se que es fácil contagio
Quito	Santo Domingo de los Tsachilas	22	Femenino	UCE	Bioquímica Clínica	4-6	SARS-COV-2	Creado en laboratorio	No estoy seguro/a	41 - 50	Verdadero	Verdadero	Verdadero	Verdadero	Falso	Falso	Falso	No estoy seguro/a	Verdadero	Verdadero	Verdadero	Verdadero	Verdadero	Verdadero	No estoy seguro/a	Verdadero	Verdadero	Falso	No estoy seguro/a	Falso	Verdadero	Falso	Falso	Verdadero
Quito	Zamora	19	Masculino	UCE	Educación Básica	1-3	COVID-19	De origen natural	Una entidad viva	No estoy seguro/a	Verdadero	Verdadero	Verdadero	Verdadero	No estoy seguro/a	Falso	Verdadero	Verdadero	Verdadero	Verdadero	Verdadero	Verdadero	Verdadero	Verdadero	Verdadero	Verdadero	Verdadero	Falso	Falso	No estoy seguro/a	Verdadero	Falso	Falso	Verdadero	Espero ser de ayuda la verdad
Quito	Quito	29	Masculino	UCE	Turismo Ecológico	7-9	SARS-COV-2	Creado en laboratorio	Un compuesto químico	51 - 100	Verdadero	Verdadero	Verdadero	Verdadero	Verdadero	Falso	Verdadero	Verdadero	Verdadero	Verdadero	Verdadero	Verdadero	Verdadero	Verdadero	No estoy seguro/a	Falso	No estoy seguro/a	No estoy seguro/a	Falso	Falso	No estoy seguro/a	No estoy seguro/a	Falso	Verdadero
Quito	Tulcan	29	Femenino	UCE	Quimica farmacéutica	9 en adelante	COVID-19	De origen natural	Una entidad viva	1 - 10	Verdadero	Verdadero	Verdadero	Verdadero	Verdadero	Falso	Verdadero	Falso	Verdadero	Verdadero	Verdadero	Verdadero	Verdadero	Verdadero	Falso	Verdadero	Verdadero	Falso	Falso	Verdadero	Verdadero	Falso	Falso	Verdadero
Quitó	Quitó	22	Femenino	UCE	Química Farmacéutica	4-6	SARS-COV-2	De origen natural	Una entidad viva	No estoy seguro/a	Verdadero	Verdadero	Verdadero	Verdadero	Falso	Falso	Verdadero	Verdadero	Verdadero	Verdadero	Verdadero	Verdadero	Verdadero	No estoy seguro/a	No estoy seguro/a	Verdadero	Verdadero	Falso	Falso	Verdadero	Verdadero	No estoy seguro/a	Falso	Verdadero
Quito	Quito	23	Femenino	UCE	Biología	1-3	SARS-COV-2	De origen natural	No estoy seguro/a	No estoy seguro/a	Verdadero	Verdadero	Verdadero	Verdadero	Falso	Falso	Verdadero	No estoy seguro/a	Verdadero	Verdadero	Verdadero	Verdadero	No estoy seguro/a	Falso	Falso	Verdadero	No estoy seguro/a	Falso	Falso	Falso	Verdadero	verdadero	Falso	Verdadero
Tulcán	Tulcán	21	Femenino	UCE	Química Farmacéutica	4-6	SARS-COV-2	No estoy seguro/a	Una entidad viva	No estoy seguro/a	Verdadero	Verdadero	Verdadero	Verdadero	No estoy seguro/a	Falso	Verdadero	Falso	Verdadero	Verdadero	Verdadero	Verdadero	Verdadero	Verdadero	No estoy seguro/a	No estoy seguro/a	Verdadero	Verdadero	Falso	Falso	Verdadero	Falso	Falso	Verdadero
Quito	Quito	21	Masculino	UCE	Química	1-3	SARS-COV-2	De origen natural	Un compuesto químico	11 - 20	Verdadero	Verdadero	Verdadero	Verdadero	Falso	Verdadero	Verdadero	Falso	Verdadero	Verdadero	Verdadero	Verdadero	Verdadero	Verdadero	Falso	Verdadero	Verdadero	No estoy seguro/a	Falso	Verdadero	Verdadero	Falso	No estoy seguro/a	Verdadero	Es necesario que la comunidad científica del país presione al estado para emitir cifras mas confiables, en cuanto al manejo de la pandemia.
Quito	Quito	21	Femenino	UCE	Psicología	1-3	COVID-19	No estoy seguro/a	No estoy seguro/a	No estoy seguro/a	Verdadero	Verdadero	Verdadero	Verdadero	Falso	Falso	Verdadero	No estoy seguro/a	Verdadero	Verdadero	Verdadero	Verdadero	Verdadero	Verdadero	No estoy seguro/a	No estoy seguro/a	Falso	Falso	Falso	Verdadero	Falso	Falso	Falso	Verdadero
Quito	Quito	24	Femenino	UCE	Economía	4-6	COVID-19	De origen natural	No estoy seguro/a	41 - 50	Verdadero	Verdadero	Verdadero	Verdadero	Falso	Falso	Verdadero	No estoy seguro/a	Verdadero	Verdadero	Verdadero	Verdadero	Verdadero	Verdadero	Falso	No estoy seguro/a	Verdadero	Falso	Falso	No estoy seguro/a	Verdadero	Falso	Falso	Verdadero
Quito	Quito	25	Masculino	UCE	Medicina Veterinaria y Zootecnia	7-9	SARS-COV-2	De origen natural	Una entidad viva	11 - 20	Verdadero	Verdadero	Verdadero	Verdadero	No estoy seguro/a	Falso	Verdadero	Verdadero	Verdadero	Verdadero	Verdadero	Verdadero	Verdadero	Verdadero	Falso	Verdadero	Verdadero	Verdadero	Falso	No estoy seguro/a	Verdadero	Falso	Falso	Verdadero
Otavalo	Ibarra	21	Femenino	UCE	Finanzas	1-3	SARS-COV-2	Creado en laboratorio	Un complot mediático	41 - 50	No estoy seguro/a	Verdadero	Verdadero	Verdadero	Falso	Falso	Falso	Verdadero	Verdadero	Verdadero	Verdadero	Verdadero	Verdadero	Verdadero	Falso	Verdadero	Falso	Verdadero	Falso	Verdadero	Verdadero	Falso	Falso	Verdadero	Desde un inicio tenían que haber hecho algo por el país pero como el gobierno que tenemos es una vergüenza al final el país va a quedar hundido de muerte por pobreza y no por covid 19
Quito	Quito	21	Masculino	UCE	Ingenieria Quimica	4-6	SARS-COV-2	De origen natural	Una entidad viva	No estoy seguro/a	Verdadero	Verdadero	Verdadero	Verdadero	No estoy seguro/a	Falso	Verdadero	Falso	Falso	Verdadero	Verdadero	Verdadero	Verdadero	Verdadero	No estoy seguro/a	No estoy seguro/a	Verdadero	No estoy seguro/a	Falso	Falso	Verdadero	No estoy seguro/a	Falso	Verdadero
Quito	Quito	21	Femenino	UCE	Pedagogía de la lengua y literatura	4-6	SARS-COV-2	Creado en laboratorio	Una entidad viva	No estoy seguro/a	No estoy seguro/a	Verdadero	Verdadero	Verdadero	No estoy seguro/a	Falso	Verdadero	No estoy seguro/a	Verdadero	Verdadero	Verdadero	Verdadero	Verdadero	Verdadero	No estoy seguro/a	No estoy seguro/a	Verdadero	No estoy seguro/a	No estoy seguro/a	Verdadero	No estoy seguro/a	No estoy seguro/a	No estoy seguro/a	Verdadero
Quito	Quito	39	Masculino	UCE	Sociología	4-6	SARS-COV-2	De origen natural	No estoy seguro/a	11 - 20	No estoy seguro/a	Verdadero	Verdadero	Verdadero	No estoy seguro/a	Falso	Verdadero	Verdadero	Verdadero	Verdadero	Verdadero	Verdadero	Verdadero	Verdadero	Falso	Verdadero	Verdadero	Falso	Falso	Falso	Verdadero	Falso	Falso	Verdadero
Quito	Quito	22	Femenino	UCE	Administración Pública	7-9	No estoy seguro/a	No estoy seguro/a	No estoy seguro/a	51 - 100	No estoy seguro/a	Verdadero	Verdadero	Verdadero	No estoy seguro/a	Falso	Verdadero	Falso	Verdadero	Verdadero	Verdadero	Verdadero	Verdadero	Verdadero	No estoy seguro/a	No estoy seguro/a	Verdadero	No estoy seguro/a	verdadero	No estoy seguro/a	Falso	Falso	Falso	Verdadero
Quito	Quito	18	Femenino	UCE	Educación Inicial		COVID-19	Creado en laboratorio	No estoy seguro/a	No estoy seguro/a	Verdadero	Verdadero	Verdadero	Verdadero	Falso	Falso	Verdadero	Verdadero	Verdadero	Verdadero	Verdadero	Verdadero	Verdadero	Verdadero	No estoy seguro/a	No estoy seguro/a	Verdadero	Falso	Falso	Verdadero	No estoy seguro/a	Falso	Falso	Verdadero
Otavalo	Otavalo	18	Femenino	UCE	Medicina	1-3	SARS-COV-2	De origen natural	Una entidad viva	11 - 20	Verdadero	Verdadero	Verdadero	Verdadero	Falso	Falso	Verdadero	Falso	Verdadero	Verdadero	Verdadero	Verdadero	Verdadero	Verdadero	No estoy seguro/a	Verdadero	Verdadero	Falso	Falso	Falso	No estoy seguro/a	Falso	Falso	Verdadero
Quito	Quito	20	Femenino	UCE	Medicina	1-3	SARS-COV-2	De origen natural	No estoy seguro/a	51 - 100	Verdadero	Verdadero	Verdadero	Verdadero	Falso	Falso	Verdadero	Verdadero	Verdadero	Verdadero	Verdadero	Verdadero	Verdadero	Verdadero	Falso	Verdadero	Verdadero	Falso	Falso	Falso	Verdadero	Falso	Falso	Verdadero	LA PREGUNTA NO TIENE OPCIONES DE RESPUESTA ACERTADAS: Considera usted que el virus causante de COVID-19 es. Ya que el virus no se considera vivo, no fue creado en laboratorios y no es un compuesto químico.
Quito	Quito	26	Femenino	UCE	Medicina Veterinaria y Zootecnia	7-9	SARS-COV-2	De origen natural	Una entidad viva	1 - 10	Verdadero	Verdadero	Verdadero	Verdadero	Falso	Falso	Verdadero	Falso	Verdadero	Verdadero	Verdadero	Falso	Verdadero	Verdadero	Falso	Verdadero	Verdadero	Falso	Falso	Falso	Verdadero	Falso	Falso	Verdadero
Quito	Santo Domingo	24	Femenino	UCE	Bioquímica y farmacia	1-3	COVID-19	De origen natural	Una entidad viva	31 - 40	Falso	Verdadero	Verdadero	Verdadero	Falso	Falso	Verdadero	Falso	Verdadero	Falso	Verdadero	Verdadero	Verdadero	Verdadero	No estoy seguro/a	Verdadero	Verdadero	Falso	Falso	Verdadero	Verdadero	Falso	Falso	Verdadero	Que otros angentes o anticuerpos afectan a nuestro cuerpo al ingresar el virus del Covid- 19
Quito	Quito	22	Masculino	UCE	Artes Plásticas	4-6	No estoy seguro/a	De origen natural	Un compuesto químico	1 - 10	Verdadero	Verdadero	Verdadero	Verdadero	Falso	Falso	Verdadero	Verdadero	No estoy seguro/a	Verdadero	Verdadero	Verdadero	Verdadero	Verdadero	Falso	Verdadero	Verdadero	Falso	Falso	Falso	Verdadero	Falso	Falso	Verdadero
Quito	Guayaquil	24	Masculino	UCE	Radiología	7-9	SARS-COV-2	No estoy seguro/a	No estoy seguro/a	11 - 20	Falso	Verdadero	Verdadero	Verdadero	Falso	Falso	Verdadero	Falso	Verdadero	Verdadero	No estoy seguro/a	Falso	Verdadero	Verdadero	Falso	Verdadero	Verdadero	Falso	Falso	Falso	Verdadero	Falso	Falso	Verdadero
Quito	Quito	27	Femenino	UCE	Enfermería	4-6	SARS-COV-2	No estoy seguro/a	Una entidad viva	No estoy seguro/a	No estoy seguro/a	No estoy seguro/a	Verdadero	Verdadero	Falso	Falso	Verdadero	Verdadero	Verdadero	Verdadero	Verdadero	Verdadero	Verdadero	Verdadero	No estoy seguro/a	No estoy seguro/a	No estoy seguro/a	Falso	Falso	Falso	Verdadero	Falso	Falso	Verdadero
Quito	Quito	21	Femenino	UCE	Biología	4-6	SARS-COV-2	De origen natural	Un compuesto químico	No estoy seguro/a	Verdadero	Verdadero	Verdadero	Verdadero	Falso	Falso	Verdadero	Falso	Verdadero	Verdadero	Verdadero	Verdadero	Verdadero	Verdadero	Falso	Verdadero	Verdadero	Falso	Falso	No estoy seguro/a	Verdadero	Falso	Falso	Verdadero
Quito	Quito	25	Masculino	UCE	Biología	4-6	SARS-COV-2	No estoy seguro/a	No estoy seguro/a	1 - 10	No estoy seguro/a	Verdadero	Verdadero	Verdadero	Falso	Falso	Verdadero	Verdadero	Verdadero	Verdadero	Verdadero	Verdadero	Verdadero	Verdadero	Falso	Verdadero	Verdadero	Falso	Falso	Falso	Verdadero	Falso	Falso	Verdadero	Acerca de la pregunta de cómo considero al virus, parece ser que la respuesta más razonable es una entidad viva en comparación con las otras respuestas; pero en sí, los virus no son considerados organismos vivos. Excelente que se realicen éste tipo de encuestas.
QUITO	QUITO	21	Masculino	UCE	MEDICINA	7-9	SARS-COV-2	De origen natural	Una entidad viva	1 - 10	Verdadero	Verdadero	Verdadero	Verdadero	Falso	Falso	Verdadero	Verdadero	Verdadero	Verdadero	Verdadero	Verdadero	Verdadero	Verdadero	Falso	Verdadero	Verdadero	Falso	Falso	Falso	Verdadero	Falso	Falso	Verdadero
Quito	Quito	21	Masculino	UCE	Ciencias Policiales y Seguridad Ciudadana	4-6	SARS-COV-2	De origen natural	Una entidad viva	1 - 10	No estoy seguro/a	Verdadero	Verdadero	Verdadero	Falso	Falso	Verdadero	No estoy seguro/a	Verdadero	Verdadero	Verdadero	Verdadero	Verdadero	Verdadero	No estoy seguro/a	Falso	Verdadero	Falso	Falso	Falso	Verdadero	Falso	Falso	Verdadero
Quito	Loja	22	Femenino	UCE	Medicina	4-6	SARS-COV-2	De origen natural	Una entidad viva	21 - 30	Falso	Verdadero	Verdadero	Verdadero	Falso	Falso	Verdadero	Verdadero	Verdadero	Verdadero	Verdadero	Verdadero	Verdadero	Verdadero	Falso	Verdadero	Verdadero	Falso	Falso	Falso	Verdadero	Falso	Falso	Verdadero
Latacunga	Quito	18	Femenino	UCE	Psicología	1-3	SARS-COV-2	Creado en laboratorio	Un compuesto químico	51 - 100	Falso	Verdadero	Verdadero	Verdadero	Falso	Falso	Verdadero	Verdadero	Verdadero	Verdadero	Verdadero	Verdadero	Verdadero	Verdadero	No estoy seguro/a	Verdadero	Verdadero	Falso	Falso	No estoy seguro/a	Verdadero	Falso	Falso	Verdadero
QUITO	QUITO	21	Femenino	UCE	MEDICINA	1-3	SARS-COV-2	De origen natural	Una entidad viva	11 - 20	Verdadero	Verdadero	Verdadero	Verdadero	No estoy seguro/a	Falso	Verdadero	Verdadero	Verdadero	Verdadero	Verdadero	Verdadero	Falso	Verdadero	Falso	Verdadero	Falso	Falso	Falso	Verdadero	Verdadero	Falso	Verdadero	Verdadero
Ambato	Alausi	22	Masculino	UCE	Comunicación Social	1-3	SARS-COV-2	De origen natural	Una entidad viva	1 - 10	No estoy seguro/a	Verdadero	Verdadero	Verdadero	No estoy seguro/a	Falso	No estoy seguro/a	Verdadero	Verdadero	Verdadero	Verdadero	Verdadero	Verdadero	Verdadero	Verdadero	No estoy seguro/a	Verdadero	Falso	Falso	Verdadero	Falso	Falso	Falso	Verdadero
Cotacachi	Ibarra	20	Femenino	UCE	Pedagogía	1-3	SARS-COV-2	De origen natural	Una entidad viva	1 - 10	Verdadero	Verdadero	Verdadero	Verdadero	Falso	Falso	Verdadero	Verdadero	Verdadero	Verdadero	Verdadero	Verdadero	Verdadero	Verdadero	Falso	Verdadero	Verdadero	Falso	verdadero	Verdadero	Verdadero	Falso	Falso	Verdadero
Quito	Quito	20	Femenino	UCE	Biologia	4-6	SARS-COV-2	De origen natural	Un compuesto químico	No estoy seguro/a	Verdadero	Verdadero	No estoy seguro/a	Verdadero	Verdadero	Falso	Verdadero	Verdadero	Verdadero	Verdadero	Verdadero	Verdadero	Verdadero	Verdadero	Falso	Verdadero	Verdadero	Falso	Falso	Falso	No estoy seguro/a	No estoy seguro/a	Falso	Verdadero
Sangolquí	Sangolquí	21	Masculino	UCE	Contabilidad y Auditoría	7-9	SARS-COV-2	No estoy seguro/a	No estoy seguro/a	41 - 50	No estoy seguro/a	Verdadero	Verdadero	Verdadero	Verdadero	Falso	Verdadero	Falso	Verdadero	Verdadero	Verdadero	Verdadero	Verdadero	Verdadero	No estoy seguro/a	No estoy seguro/a	Verdadero	Verdadero	Falso	Verdadero	Verdadero	verdadero	Falso	Verdadero
Quito	Quito	20	Femenino	UCE	Medicina Veterinaria	1-3	SARS-COV-2	De origen natural	Una entidad viva	No estoy seguro/a	No estoy seguro/a	Verdadero	No estoy seguro/a	Verdadero	Falso	Falso	Verdadero	Verdadero	Verdadero	Verdadero	Verdadero	Verdadero	Verdadero	Verdadero	No estoy seguro/a	No estoy seguro/a	Verdadero	Falso	Falso	Verdadero	Falso	Falso	Verdadero	Verdadero
Quito	Quito	19	Femenino	UCE	Medicina	1-3	COVID-19	De origen natural	No estoy seguro/a	41 - 50	Verdadero	Verdadero	Verdadero	Verdadero	Falso	Falso	Verdadero	Falso	Verdadero	Verdadero	Verdadero	Verdadero	Verdadero	Verdadero	Falso	Verdadero	Verdadero	Falso	Falso	Falso	Verdadero	Falso	Falso	Verdadero
Quito	Quito	18	Masculino	UCE	Ingeniería Agronómica	1-3	SARS-COV-2	Creado en laboratorio	Una entidad viva	11 - 20	Falso	Verdadero	Verdadero	Verdadero	Falso	Falso	Verdadero	Verdadero	Verdadero	Verdadero	Verdadero	Falso	Verdadero	Verdadero	Verdadero	No estoy seguro/a	No estoy seguro/a	Falso	No estoy seguro/a	No estoy seguro/a	Verdadero	Falso	Falso	Verdadero
Quito	Quito	20	Femenino	UCE	Pedagogía en química y biología	1-3	SARS-COV-2	De origen natural	Una entidad viva	21 - 30	Falso	Verdadero	Verdadero	Verdadero	Falso	Falso	Verdadero	Falso	Verdadero	Verdadero	Verdadero	Verdadero	Falso	Verdadero	Falso	Verdadero	Verdadero	Falso	Falso	Verdadero	Verdadero	Falso	Falso	Verdadero
Tulcán	Ibarra	28	Masculino	UCE	Administración de empresas	7-9	SARS-COV-2	No estoy seguro/a	Una entidad viva	No estoy seguro/a	Verdadero	Verdadero	Verdadero	Verdadero	Falso	Falso	Verdadero	Falso	Verdadero	Verdadero	Verdadero	Verdadero	Verdadero	Verdadero	Falso	Verdadero	Verdadero	Falso	Falso	Falso	Verdadero	Falso	Falso	Verdadero	Ampliar el toque de queda en zonas con semafor amarillo
Cayambe	Ibarra	21	Femenino	UCE	Educación Inicial	4-6	No estoy seguro/a	Creado en laboratorio	Un compuesto químico	41 - 50	Verdadero	Verdadero	Verdadero	Verdadero	Falso	Falso	Verdadero	Falso	Verdadero	Verdadero	Verdadero	Verdadero	Verdadero	Verdadero	No estoy seguro/a	No estoy seguro/a	No estoy seguro/a	Falso	verdadero	Falso	Verdadero	Falso	Falso	Verdadero
Quito	Quito	19	Masculino	UCE	Química	1-3	SARS-COV-2	Creado en laboratorio	Un complot mediático	1 - 10	Verdadero	Verdadero	Verdadero	Verdadero	No estoy seguro/a	Falso	Verdadero	No estoy seguro/a	Verdadero	Verdadero	Verdadero	Verdadero	Verdadero	Verdadero	No estoy seguro/a	No estoy seguro/a	No estoy seguro/a	Falso	Falso	Falso	No estoy seguro/a	Falso	Falso	Verdadero
Quito	Guayas	25	Femenino	UCE	Contabilidad y Auditoría	1-3	SARS-COV-2	De origen natural	Una entidad viva	51 - 100	No estoy seguro/a	No estoy seguro/a	Verdadero	Verdadero	Falso	Falso	Verdadero	Falso	Verdadero	Verdadero	Verdadero	Verdadero	Verdadero	Verdadero	No estoy seguro/a	No estoy seguro/a	Verdadero	Falso	Falso	Falso	Verdadero	Falso	Falso	Falso
Quito	Quito	20	Femenino	UCE	Finanzas	1-3	SARS-COV-2	Creado en laboratorio	Una entidad viva	No estoy seguro/a	Falso	Verdadero	Verdadero	Verdadero	Falso	No estoy seguro/a	Verdadero	Falso	Verdadero	Verdadero	Verdadero	Verdadero	Verdadero	Verdadero	No estoy seguro/a	No estoy seguro/a	Verdadero	Verdadero	No estoy seguro/a	Verdadero	Falso	Falso	Falso	Verdadero
Ambato	Ambato	24	Masculino	UCE	Medicina	7-9	SARS-COV-2	De origen natural	Una entidad viva	1 - 10	Verdadero	Verdadero	Verdadero	Verdadero	Falso	Falso	Verdadero	Verdadero	Verdadero	Verdadero	Verdadero	Verdadero	Verdadero	Verdadero	Falso	No estoy seguro/a	Verdadero	Falso	Falso	Falso	Verdadero	Falso	Falso	Verdadero
Quito	Ambato	23	Masculino	UCE	Derecho	9 en adelante	SARS-COV-2	No estoy seguro/a	Un compuesto químico	31 - 40	No estoy seguro/a	Verdadero	Verdadero	Verdadero	No estoy seguro/a	No estoy seguro/a	Verdadero	Verdadero	Verdadero	Verdadero	Verdadero	Verdadero	Verdadero	Verdadero	No estoy seguro/a	Verdadero	Verdadero	Falso	verdadero	Verdadero	No estoy seguro/a	Falso	No estoy seguro/a	Verdadero
Sangolquí	Quito	19	Masculino	UCE	Medicina	1-3	SARS-COV-2	De origen natural	Una entidad viva	1 - 10	Verdadero	Verdadero	Verdadero	Verdadero	Falso	Falso	Verdadero	Verdadero	Verdadero	Verdadero	Verdadero	Verdadero	Verdadero	Verdadero	Falso	Verdadero	Verdadero	Falso	Falso	Falso	Verdadero	Falso	Falso	Verdadero
Quito	Quito	26	Masculino	UCE	Economía	1-3	SARS-COV-2	Creado en laboratorio	Una entidad viva	No estoy seguro/a	Verdadero	Verdadero	Verdadero	Verdadero	Falso	Falso	Verdadero	Verdadero	Verdadero	Verdadero	Verdadero	Verdadero	Verdadero	Verdadero	Falso	Verdadero	Verdadero	Falso	Falso	Falso	Verdadero	Falso	Falso	Verdadero
Quito	Quito	22	Femenino	UCE	Comunicación Social	4-6	No estoy seguro/a	De origen natural	Una entidad viva	No estoy seguro/a	Verdadero	Verdadero	Verdadero	Verdadero	No estoy seguro/a	Falso	No estoy seguro/a	Falso	Verdadero	Verdadero	Verdadero	Verdadero	Falso	Verdadero	Falso	No estoy seguro/a	Verdadero	Falso	Falso	Falso	Falso	Falso	Falso	Verdadero
Quito	Quito	23	Masculino	UCE	Sistemas	1-3	SARS-COV-2	De origen natural	Una entidad viva	No estoy seguro/a	Verdadero	Verdadero	Verdadero	Verdadero	Falso	Falso	Verdadero	Verdadero	Verdadero	Verdadero	Verdadero	Verdadero	Verdadero	Verdadero	Falso	Verdadero	Verdadero	Falso	Falso	Falso	Falso	Falso	Falso	Verdadero
Quito	Quito	19	Masculino	UCE	Derecho	1-3	SARS-COV-2	De origen natural	Una entidad viva	1 - 10	No estoy seguro/a	Verdadero	Verdadero	Verdadero	Verdadero	Falso	Verdadero	Verdadero	Verdadero	Verdadero	Verdadero	Verdadero	Verdadero	Verdadero	Falso	Verdadero	Verdadero	Falso	Falso	No estoy seguro/a	Falso	Falso	Falso	Verdadero
Quito	Quito	21	Femenino	UCE	Química Pura	4-6	SARS-COV-2	De origen natural	Una entidad viva	11 - 20	Falso	Verdadero	Verdadero	Verdadero	Falso	Falso	Verdadero	Verdadero	Falso	Verdadero	Verdadero	Verdadero	Verdadero	Verdadero	Falso	Verdadero	Verdadero	Falso	Falso	Verdadero	Verdadero	Falso	Falso	Verdadero
QUITO	QUITO	25	Femenino	UCE	MEDICINA	9 en adelante	SARS-COV-2	Creado en laboratorio	No estoy seguro/a	1 - 10	No estoy seguro/a	Verdadero	Verdadero	Verdadero	Falso	Falso	Verdadero	Verdadero	Verdadero	Verdadero	Verdadero	Verdadero	Verdadero	Verdadero	Falso	Verdadero	Verdadero	Falso	No estoy seguro/a	Falso	Verdadero	Falso	Falso	Verdadero
Quito	Quito	24	Masculino	UCE	Ingeniería estadística	4-6	SARS-COV-2	Creado en laboratorio	Un complot mediático	11 - 20	No estoy seguro/a	Verdadero	Verdadero	Verdadero	Falso	Falso	Verdadero	Falso	Verdadero	Verdadero	Verdadero	Verdadero	Verdadero	Verdadero	Verdadero	No estoy seguro/a	Verdadero	Falso	Falso	No estoy seguro/a	No estoy seguro/a	Falso	Falso	Verdadero
Quito	Quito	21	Femenino	UCE	Bioquímica y farmacia	1-3	SARS-COV-2	De origen natural	Una entidad viva	1 - 10	Verdadero	Verdadero	Verdadero	Verdadero	Falso	Falso	Verdadero	Verdadero	Verdadero	Verdadero	Verdadero	Verdadero	Verdadero	Verdadero	No estoy seguro/a	No estoy seguro/a	Verdadero	Falso	Falso	No estoy seguro/a	Verdadero	Falso	Falso	Verdadero
Quito	Zaruma	27	Femenino	UCE	Educación básica	1-3	No estoy seguro/a	De origen natural	Una entidad viva	No estoy seguro/a	Falso	Verdadero	Verdadero	Verdadero	Falso	Falso	Verdadero	Falso	Verdadero	Verdadero	Verdadero	Verdadero	Falso	Verdadero	Verdadero	Verdadero	Falso	Falso	Falso	Falso	Verdadero	Falso	Falso	Verdadero	Nada que decir
Latacunga	Latacunga	18	Femenino	UCE	Ingeniería civil	1-3	COVID-19	No estoy seguro/a	Una entidad viva	No estoy seguro/a	No estoy seguro/a	Verdadero	Verdadero	Verdadero	No estoy seguro/a	Falso	Verdadero	No estoy seguro/a	Verdadero	Verdadero	Verdadero	Verdadero	Verdadero	Verdadero	No estoy seguro/a	No estoy seguro/a	No estoy seguro/a	Verdadero	verdadero	Verdadero	Verdadero	Falso	Verdadero	Verdadero
quito	loja	19	Masculino	UCE	Pedagogia en ciencias experimentales matemática y física	1-3	SARS-COV-2	Creado en laboratorio	Una entidad viva	11 - 20	Verdadero	Verdadero	Verdadero	Verdadero	Falso	Falso	Verdadero	Verdadero	Verdadero	Verdadero	Verdadero	Verdadero	Verdadero	Verdadero	Verdadero	Falso	Falso	Falso	Falso	Falso	Verdadero	Falso	Falso	Verdadero
QUITO	QUITO	21	Femenino	UCE	ODONTOLOGÍA	1-3	SARS-COV-2	No estoy seguro/a	No estoy seguro/a	No estoy seguro/a	Verdadero	Verdadero	Verdadero	Verdadero	No estoy seguro/a	Falso	Verdadero	Verdadero	Verdadero	Verdadero	Verdadero	No estoy seguro/a	Verdadero	Verdadero	Falso	Verdadero	Verdadero	No estoy seguro/a	No estoy seguro/a	Falso	Verdadero	No estoy seguro/a	No estoy seguro/a	Verdadero
Tabacundo	Tabacundo	22	Masculino	UCE	Ingeniería Civil	4-6	SARS-COV-2	Creado en laboratorio	Un complot mediático	11 - 20	No estoy seguro/a	No estoy seguro/a	Verdadero	Verdadero	Falso	Falso	Verdadero	No estoy seguro/a	Verdadero	Verdadero	Verdadero	Verdadero	Verdadero	Verdadero	Falso	No estoy seguro/a	Verdadero	Verdadero	Falso	Falso	Falso	No estoy seguro/a	Falso	Verdadero
Quito	Quito	19	Femenino	UCE	Bioquímica y farmacia	1-3	COVID-19	De origen natural	Una entidad viva	1 - 10	Falso	Verdadero	Verdadero	Verdadero	Falso	Falso	Verdadero	Falso	Verdadero	No estoy seguro/a	Verdadero	Verdadero	No estoy seguro/a	Verdadero	No estoy seguro/a	Verdadero	Verdadero	Falso	verdadero	Verdadero	Falso	Falso	Falso	Verdadero
quito	santo domingo	20	Femenino	UCE	enfermeria	1-3	SARS-COV-2	No estoy seguro/a	No estoy seguro/a	No estoy seguro/a	Verdadero	Verdadero	Verdadero	Verdadero	No estoy seguro/a	Falso	Verdadero	Falso	Verdadero	Verdadero	Verdadero	Verdadero	Verdadero	Verdadero	No estoy seguro/a	Verdadero	Verdadero	Falso	Falso	Verdadero	Verdadero	Falso	No estoy seguro/a	Verdadero	es muy importante conocer respecto a este virus que estamos viviendo
Quito	Quito	23	Masculino	UCE	Biología	7-9	SARS-COV-2	De origen natural	Una entidad viva	1 - 10	Verdadero	Verdadero	Verdadero	Verdadero	Falso	Falso	Verdadero	Verdadero	Verdadero	Verdadero	Verdadero	Verdadero	Verdadero	Verdadero	Falso	Verdadero	Verdadero	Falso	Falso	Falso	Verdadero	Falso	Falso	Verdadero
Quito	Loja	23	Femenino	UCE	Arquitectura	4-6	No estoy seguro/a	No estoy seguro/a	Una entidad viva	51 - 100	Verdadero	Verdadero	Verdadero	Verdadero	Falso	Falso	Verdadero	No estoy seguro/a	Verdadero	Verdadero	Verdadero	Verdadero	Verdadero	Verdadero	Falso	Falso	No estoy seguro/a	Falso	Falso	Falso	Verdadero	Falso	Falso	Verdadero	Muchas personas no tienen dinero para realizarse una PCR para regresar a trabajar, por lo mismo buscan trabajar...
Quito	Pichincha	24	Masculino	UCE	Química y biología	7-9	SARS-COV-2	De origen natural	Un complot mediático	31 - 40	Verdadero	Verdadero	Verdadero	Verdadero	Falso	Falso	Verdadero	Verdadero	Verdadero	Verdadero	Verdadero	Verdadero	Verdadero	Verdadero	Falso	Verdadero	Verdadero	Falso	Falso	Falso	Verdadero	Falso	Falso	Verdadero
Quito	Quito	24	Femenino	UCE	Medicina	9 en adelante	SARS-COV-2	De origen natural	Una entidad viva	1 - 10	Verdadero	Verdadero	Verdadero	Verdadero	No estoy seguro/a	Falso	Verdadero	Falso	Verdadero	Verdadero	Verdadero	Verdadero	Verdadero	Verdadero	No estoy seguro/a	Verdadero	Verdadero	Falso	Falso	Falso	Verdadero	Falso	Falso	Verdadero	Por favor deberían mandar las respuestas correctas para saber que estamos creyendo mal o no sabemos
Quito	Quito	26	Femenino	UCE	Psicología Clínica	4-6	SARS-COV-2	No estoy seguro/a	Una entidad viva	No estoy seguro/a	No estoy seguro/a	Verdadero	Verdadero	Falso	Verdadero	Falso	Verdadero	No estoy seguro/a	Verdadero	Verdadero	Verdadero	Verdadero	Verdadero	Verdadero	No estoy seguro/a	Verdadero	Verdadero	Falso	No estoy seguro/a	Verdadero	Verdadero	No estoy seguro/a	Falso	Verdadero
Quito	Quito	24	Masculino	UCE	Medicina	9 en adelante	SARS-COV-2	De origen natural	Una entidad viva	1 - 10	Verdadero	Verdadero	Verdadero	Verdadero	Verdadero	Falso	Verdadero	Falso	Verdadero	Verdadero	Verdadero	Verdadero	Verdadero	Verdadero	Falso	Verdadero	Verdadero	Falso	Falso	Falso	Verdadero	Falso	Falso	Verdadero
Quito	Quito	23	Masculino	UCE	arquitectura	4-6	COVID-19	De origen natural	Una entidad viva	1 - 10	No estoy seguro/a	Verdadero	Verdadero	Verdadero	Falso	Falso	Verdadero	Verdadero	Verdadero	Verdadero	Verdadero	Verdadero	Verdadero	Verdadero	No estoy seguro/a	No estoy seguro/a	No estoy seguro/a	Falso	Falso	Verdadero	Verdadero	Falso	No estoy seguro/a	Verdadero
UIO	UIO	22	Masculino	UCE	Medicina veterinaria y zootecnia	9 en adelante	SARS-COV-2	De origen natural	Una entidad viva	1 - 10	Verdadero	Verdadero	Verdadero	Verdadero	Falso	Falso	Verdadero	No estoy seguro/a	Verdadero	Verdadero	Verdadero	Verdadero	Verdadero	Verdadero	Falso	Verdadero	Verdadero	Falso	Falso	Falso	Verdadero	No estoy seguro/a	Falso	Verdadero
Quito	Quito	20	Femenino	UCE	Bioquímica y Farmacia	1-3	SARS-COV-2	No estoy seguro/a	Una entidad viva	1 - 10	Verdadero	Verdadero	Verdadero	Verdadero	Falso	Falso	Verdadero	Verdadero	Verdadero	Verdadero	Verdadero	Verdadero	Verdadero	Verdadero	Falso	Falso	Verdadero	Verdadero	Falso	Falso	Verdadero	No estoy seguro/a	Verdadero	Verdadero
Quito	Quito	19	Masculino	UCE	Finanzas	1-3	SARS-COV-2	Creado en laboratorio	Un complot mediático	1 - 10	Verdadero	Verdadero	Verdadero	Verdadero	Falso	Falso	Verdadero	Verdadero	Verdadero	Verdadero	Verdadero	Verdadero	Verdadero	Verdadero	Verdadero	Verdadero	Falso	Falso	Falso	Falso	Verdadero	Falso	Verdadero	Verdadero
Quito	Quito	21	Masculino	UCE	Matemática y Física	4-6	SARS-COV-2	De origen natural	Una entidad viva	1 - 10	Verdadero	Verdadero	Verdadero	Verdadero	Falso	Falso	Verdadero	Falso	Verdadero	Verdadero	Verdadero	Verdadero	Verdadero	Verdadero	Falso	Verdadero	Falso	Falso	Falso	Verdadero	Falso	Falso	Falso	Verdadero	Preguntas repetidas. Los virus no se consideran organismos vivos
Ibarra	Ibarra	26	Masculino	UCE	Biología	1-3	SARS-COV-2	De origen natural	Una entidad viva	No estoy seguro/a	Verdadero	Verdadero	Verdadero	Verdadero	Falso	Falso	Verdadero	Falso	Falso	Verdadero	Verdadero	Verdadero	Verdadero	Verdadero	Falso	Verdadero	No estoy seguro/a	No estoy seguro/a	Falso	Falso	Verdadero	Falso	Falso	Verdadero
quito	puyo	23	Femenino	UCE	arquitectura	9 en adelante	SARS-COV-2	De origen natural	Una entidad viva	1 - 10	Verdadero	Verdadero	Verdadero	Verdadero	Falso	Falso	Verdadero	Falso	Verdadero	Verdadero	Verdadero	Verdadero	Verdadero	Verdadero	No estoy seguro/a	Verdadero	Verdadero	Falso	Falso	Falso	Verdadero	Falso	Falso	Verdadero
Quito	Quito	19	Masculino	UCE	Ing. En Computación	1-3	COVID-19	Creado en laboratorio	No estoy seguro/a	11 - 20	No estoy seguro/a	Verdadero	No estoy seguro/a	Verdadero	No estoy seguro/a	Falso	Verdadero	Verdadero	Verdadero	Verdadero	Verdadero	Verdadero	Verdadero	Verdadero	No estoy seguro/a	No estoy seguro/a	Verdadero	Falso	No estoy seguro/a	No estoy seguro/a	No estoy seguro/a	Falso	No estoy seguro/a	Verdadero
Latacunga	Latacunga	21	Femenino	UCE	Medicina	1-3	SARS-COV-2	De origen natural	Una entidad viva	1 - 10	No estoy seguro/a	Verdadero	Verdadero	Verdadero	Falso	Falso	Falso	Falso	Verdadero	Verdadero	Verdadero	Verdadero	Verdadero	Verdadero	Falso	Verdadero	Verdadero	Falso	Falso	Falso	Verdadero	Falso	Falso	Verdadero
Quito	Quito	24	Masculino	UCE	Laboratorio clínico e histotecnológico	7-9	SARS-COV-2	No estoy seguro/a	Una entidad viva	41 - 50	Verdadero	Verdadero	Verdadero	Verdadero	Falso	Falso	Verdadero	No estoy seguro/a	Verdadero	Verdadero	Verdadero	Verdadero	Verdadero	Verdadero	Falso	Verdadero	Verdadero	Falso	Falso	Falso	Falso	Falso	Falso	Verdadero
Quito	Quito	24	Masculino	UCE	Laboratorio clínico e histotecnológico	7-9	SARS-COV-2	No estoy seguro/a	Una entidad viva	41 - 50	Verdadero	Verdadero	Verdadero	Verdadero	Falso	Falso	Verdadero	No estoy seguro/a	Verdadero	Verdadero	Verdadero	Verdadero	Verdadero	Verdadero	Falso	Verdadero	Verdadero	Falso	Falso	Falso	Falso	Falso	Falso	Verdadero
Quito	Guaranda	22	Femenino	UCE	Laboratorio Clínico	4-6	SARS-COV-2	De origen natural	Una entidad viva	No estoy seguro/a	Verdadero	Verdadero	Verdadero	Verdadero	No estoy seguro/a	Falso	Verdadero	Falso	Verdadero	Verdadero	Verdadero	Verdadero	Verdadero	Verdadero	Falso	Verdadero	Verdadero	Falso	Falso	Falso	Verdadero	Falso	Falso	Verdadero
Quito	Ambato	20	Femenino	UCE	Odontología	1-3	COVID-19	Creado en laboratorio	Un complot mediático	21 - 30	Falso	Falso	Verdadero	Verdadero	Falso	Falso	Verdadero	Falso	Verdadero	Verdadero	Verdadero	Verdadero	Verdadero	Verdadero	Falso	Verdadero	Verdadero	Falso	verdadero	Verdadero	Verdadero	Falso	Falso	Verdadero	Insertar preguntas de descripción
Sangolquí	Quito	23	Femenino	UCE	Bioquímica Clínica	4-6	SARS-COV-2	De origen natural	Una entidad viva	1 - 10	Falso	Verdadero	Verdadero	Verdadero	No estoy seguro/a	Falso	Verdadero	Falso	No estoy seguro/a	Verdadero	Verdadero	Verdadero	Verdadero	Verdadero	Falso	Verdadero	Verdadero	Falso	Falso	Falso	Verdadero	Falso	Falso	Verdadero
quito	quito	30	Femenino	UCE	fisioterapia	1-3	SARS-COV-2	Creado en laboratorio	Una entidad viva	51 - 100	Verdadero	Verdadero	Verdadero	Verdadero	Falso	Falso	Verdadero	Verdadero	Verdadero	Verdadero	Verdadero	Verdadero	Verdadero	Verdadero	Verdadero	Verdadero	Verdadero	Falso	No estoy seguro/a	No estoy seguro/a	Falso	Falso	Falso	Verdadero	muy buena la encuesta para aprender mas
Quito	Quito	23	Femenino	UCE	Química Farmacéutica	4-6	SARS-COV-2	De origen natural	No estoy seguro/a	No estoy seguro/a	No estoy seguro/a	Verdadero	Verdadero	Verdadero	No estoy seguro/a	Falso	Verdadero	Falso	Verdadero	Verdadero	Verdadero	Verdadero	Verdadero	Verdadero	Falso	No estoy seguro/a	Verdadero	Falso	Falso	Falso	Verdadero	Falso	Falso	Verdadero
Quito	Quito	22	Femenino	UCE	Medicina	4-6	SARS-COV-2	De origen natural	Una entidad viva	11 - 20	Verdadero	Verdadero	Verdadero	Verdadero	Falso	Falso	Verdadero	Falso	Verdadero	Verdadero	Verdadero	Verdadero	Verdadero	Verdadero	Verdadero	Verdadero	Verdadero	Falso	Falso	Falso	Verdadero	Falso	Falso	Verdadero	Creo que hay un problema en las respuestas de la primera pregunta, corríjanla, por favor
Quito	Quito	12	Masculino	UCE	Ingeniería	7-9	SARS-COV-2	No estoy seguro/a	No estoy seguro/a	1 - 10	No estoy seguro/a	No estoy seguro/a	Verdadero	Verdadero	No estoy seguro/a	Falso	Verdadero	No estoy seguro/a	Verdadero	Verdadero	Verdadero	Verdadero	Verdadero	Verdadero	Falso	No estoy seguro/a	Verdadero	No estoy seguro/a	No estoy seguro/a	Verdadero	Verdadero	No estoy seguro/a	Falso	Verdadero	3n una pregunta tiene Miles de opciones de respuesta y deberían restringir la edad si solo llenan estudiantes universitarios
Quito	Quito	23	Femenino	UCE	Sociología	4-6	SARS-COV-2	De origen natural	Una entidad viva	11 - 20	Verdadero	Verdadero	Verdadero	Verdadero	Falso	Falso	Verdadero	Verdadero	Verdadero	Verdadero	Verdadero	Verdadero	Verdadero	Verdadero	Falso	Falso	Verdadero	Falso	Falso	No estoy seguro/a	Verdadero	Falso	Falso	Verdadero
Quito	Quito	18	Femenino	UCE	Ingeniería Química	1-3	SARS-COV-2	De origen natural	Una entidad viva	21 - 30	Verdadero	Verdadero	Verdadero	Verdadero	Falso	Falso	Verdadero	No estoy seguro/a	Verdadero	Verdadero	Verdadero	Verdadero	Verdadero	Verdadero	Falso	Verdadero	Verdadero	Falso	Falso	Falso	No estoy seguro/a	Falso	Falso	Falso	En una pregunta hubieron preguntas con varias opciones de decían “Opción 4” etc. Recomiendo mejor revisión.
QUITO	CUENCA	20	Femenino	UCE	DERECHO	1-3	SARS-COV-2	Creado en laboratorio	No estoy seguro/a	21 - 30	Falso	Verdadero	Verdadero	Verdadero	Falso	Falso	Verdadero	Falso	Verdadero	Verdadero	Verdadero	Verdadero	Verdadero	Verdadero	No estoy seguro/a	Falso	Verdadero	Falso	Falso	Verdadero	Falso	Falso	Falso	Verdadero
Quito	Quito	21	Masculino	UCE	Odontología	4-6	SARS-COV-2	De origen natural	No estoy seguro/a	1 - 10	Verdadero	Verdadero	Verdadero	Verdadero	No estoy seguro/a	Falso	Verdadero	Verdadero	Verdadero	Verdadero	Verdadero	Verdadero	Verdadero	Verdadero	Falso	Verdadero	Verdadero	Falso	Falso	No estoy seguro/a	Verdadero	Falso	Falso	Verdadero	Arreglar algunas opciones de respuestas y preguntas que no dejan clara toda la información
Quito	Quito	42	Masculino	UCE	Educación Básica	1-3	SARS-COV-2	Creado en laboratorio	Una entidad viva	1 - 10	Falso	Verdadero	Verdadero	Verdadero	Falso	Falso	Verdadero	Verdadero	Verdadero	Verdadero	Falso	Verdadero	Verdadero	Verdadero	Verdadero	Verdadero	Verdadero	Verdadero	Falso	No estoy seguro/a	Verdadero	verdadero	Falso	Verdadero	si bien es cierto que esta muy cerca la vacuna contra la COVID-19 sería muy bueno que se aplique cada cierto tiempo como por ejemplo cada 12 meses 0 24
Cayambe	Cayambe	20	Masculino	UTN	Ingenieria Agroindustrial	1-3	SARS-COV-2	Creado en laboratorio	Una entidad viva	11 - 20	Falso	Verdadero	Verdadero	Verdadero	Falso	Falso	Verdadero	Verdadero	Verdadero	Verdadero	Verdadero	Verdadero	Verdadero	Verdadero	Verdadero	Verdadero	Verdadero	Verdadero	No estoy seguro/a	Verdadero	Falso	Falso	Falso	Verdadero	Yo creo que es muy factible e importante a su vez, conocer y dar a conocer sobre a esta terrible pandemia que asecha a nuestro pais y el mundo, conocer de esto nos hace mas cuidadosos y responsables con nuestra salud y la salud de los nuestros. Responsable en sentido de cuidarnos y protegernos para que no se propage mas esta enfermedad y asi ayudarnos todos. Y asi poder salir victoriosos de esta …
Quito	Napo	42	Masculino	UCE	Educación Básica	1-3	SARS-COV-2	De origen natural	Una entidad viva	1 - 10	Falso	Verdadero	Verdadero	Verdadero	Falso	Falso	Verdadero	Falso	Verdadero	Verdadero	Verdadero	Verdadero	Verdadero	Verdadero	Falso	Verdadero	Falso	Verdadero	Falso	Falso	Falso	Falso	Falso	Verdadero
Quito	Quito	47	Masculino	UCE	Administración Pública	4-6	SARS-COV-2	Creado en laboratorio	Una entidad viva	1 - 10	Verdadero	Verdadero	Verdadero	Verdadero	Falso	Falso	Verdadero	Falso	Verdadero	Verdadero	Verdadero	Verdadero	Verdadero	Verdadero	Falso	Falso	Verdadero	Falso	Falso	Falso	Verdadero	Falso	Falso	Verdadero
Quito	Quito	28	Masculino	UCE	Ingeniería Agronómica	9 en adelante	SARS-COV-2	De origen natural	Una entidad viva	1 - 10	Falso	Verdadero	Verdadero	Verdadero	Falso	Falso	Falso	Falso	Verdadero	Verdadero	Verdadero	Verdadero	Falso	Verdadero	Falso	Verdadero	Falso	Falso	Falso	No estoy seguro/a	Falso	Falso	Falso	Verdadero
Quito	Quito	20	Masculino	UCE	Quimica	1-3	SARS-COV-2	Creado en laboratorio	Un compuesto químico	31 - 40	Falso	Verdadero	No estoy seguro/a	Verdadero	Falso	Falso	No estoy seguro/a	Falso	Verdadero	Verdadero	Verdadero	Verdadero	Verdadero	Verdadero	No estoy seguro/a	Verdadero	Verdadero	Falso	No estoy seguro/a	Verdadero	Verdadero	Falso	Falso	Verdadero	Se debe hacer estudios mas actuales y profundos del dioxido de cloro
Quito	Quito	47	Masculino	UCE	Administración Pública	4-6	SARS-COV-2	Creado en laboratorio	Una entidad viva	1 - 10	Verdadero	Verdadero	Verdadero	Verdadero	Falso	Falso	Verdadero	Falso	Verdadero	Verdadero	Verdadero	Verdadero	Verdadero	Verdadero	Falso	Falso	Verdadero	Falso	Falso	Falso	Verdadero	Falso	Falso	Verdadero	Me parece muy interesante
Quito	Quito	21	Masculino	UCE	Química	4-6	SARS-COV-2	De origen natural	Una entidad viva	No estoy seguro/a	Verdadero	Verdadero	Verdadero	Verdadero	Falso	Falso	Verdadero	Falso	Verdadero	Verdadero	Verdadero	Verdadero	Verdadero	Verdadero	Verdadero	Verdadero	Falso	Verdadero	Falso	Falso	Verdadero	Falso	Falso	Verdadero	Hacer llegar estas encuestas a más personas de forma obligatoria ya que la ignorancia es inmensa en el país.
QUITO	QUITO	21	Femenino	UCE	DERECHO	4-6	SARS-COV-2	De origen natural	Una entidad viva	No estoy seguro/a	Falso	Verdadero	Verdadero	Verdadero	Falso	Falso	Verdadero	No estoy seguro/a	Verdadero	Verdadero	Verdadero	Verdadero	Verdadero	Verdadero	No estoy seguro/a	No estoy seguro/a	Verdadero	No estoy seguro/a	Falso	No estoy seguro/a	Verdadero	Falso	Falso	Verdadero
Quito	Chone	22	Masculino	UCE	Ing. Civil	1-3	SARS-COV-2	Creado en laboratorio	Una entidad viva	11 - 20	Verdadero	Verdadero	Verdadero	Verdadero	Falso	Falso	Verdadero	Falso	Verdadero	Verdadero	Verdadero	Verdadero	Verdadero	Verdadero	No estoy seguro/a	Falso	Verdadero	Falso	verdadero	Verdadero	Verdadero	Falso	Falso	Verdadero	Din comentarios
Quito	Quito	19	Femenino	UCE	Bioquímica y Farmacia	1-3	SARS-COV-2	Creado en laboratorio	Un compuesto químico	21 - 30	Falso	No estoy seguro/a	Verdadero	Verdadero	Falso	Falso	No estoy seguro/a	Falso	Verdadero	Verdadero	Verdadero	Verdadero	No estoy seguro/a	Verdadero	Falso	Falso	Verdadero	Falso	Falso	No estoy seguro/a	No estoy seguro/a	Falso	Falso	Verdadero
Quito	Quito	19	Femenino	UCE	Química	1-3	SARS-COV-2	Creado en laboratorio	Una entidad viva	No estoy seguro/a	No estoy seguro/a	Verdadero	Verdadero	Verdadero	Falso	Falso	Verdadero	Verdadero	Verdadero	Verdadero	Verdadero	Verdadero	Verdadero	Verdadero	Falso	Falso	No estoy seguro/a	Falso	verdadero	Verdadero	Falso	Falso	Falso	Verdadero
Quito	Quito	24	Masculino	UCE	Ingeniería en Sistemas	4-6	No estoy seguro/a	No estoy seguro/a	Un compuesto químico	1 - 10	No estoy seguro/a	No estoy seguro/a	Verdadero	Verdadero	Falso	Falso	Verdadero	Falso	Verdadero	Verdadero	Verdadero	Verdadero	Verdadero	Verdadero	No estoy seguro/a	No estoy seguro/a	No estoy seguro/a	Falso	Falso	Falso	Verdadero	Falso	No estoy seguro/a	Verdadero
Quito	Mestizo	23	Masculino	UCE	Ingenieria de Minas	1-3	SARS-COV-2	Creado en laboratorio	No estoy seguro/a	No estoy seguro/a	Verdadero	No estoy seguro/a	Verdadero	No estoy seguro/a	No estoy seguro/a	No estoy seguro/a	Verdadero	No estoy seguro/a	Verdadero	Verdadero	Verdadero	Verdadero	Verdadero	Verdadero	No estoy seguro/a	Verdadero	Verdadero	Falso	No estoy seguro/a	Verdadero	No estoy seguro/a	Falso	Falso	Verdadero
Quito	Quito	27	Masculino	UCE	Geología	7-9	SARS-COV-2	De origen natural	Una entidad viva	No estoy seguro/a	No estoy seguro/a	Verdadero	Verdadero	Verdadero	No estoy seguro/a	No estoy seguro/a	No estoy seguro/a	Verdadero	Verdadero	Verdadero	Verdadero	Verdadero	Verdadero	Verdadero	Verdadero	No estoy seguro/a	Verdadero	Falso	Falso	Falso	Verdadero	Falso	Verdadero	Verdadero	La realidad que se vive es muy dura cuando se tiene familiares contagiados e incluso muertos por Covid19. Es muy frustrante que no utilicen la mascarilla correctamente y no exista distanciamiento
Quito	Quito	36	Femenino	UCE	Pedagogia de la Historia y las Ciencias Sociales	4-6	SARS-COV-2	Creado en laboratorio	Una entidad viva	51 - 100	Verdadero	Verdadero	Verdadero	Verdadero	Falso	Falso	Verdadero	Verdadero	Verdadero	Verdadero	Verdadero	Verdadero	Verdadero	Verdadero	Falso	Verdadero	Falso	Falso	Falso	Verdadero	Verdadero	verdadero	Verdadero	Verdadero	Necesitan poner como es la atención que reciben en el iess ya que por mi parte es pésima por eso es la muerte de varias personas por negligencia médica de parte de enfermeras y médicos mi número para más detalles 0939702491
QUITO	QUITO	50	Femenino	UCE	CIENCIAS DE LA EDUCACIÓN	1-3	SARS-COV-2	Creado en laboratorio	Una entidad viva	51 - 100	Falso	Verdadero	Verdadero	Verdadero	Verdadero	Falso	Verdadero	Verdadero	Verdadero	Verdadero	Verdadero	Verdadero	Verdadero	Verdadero	Falso	Verdadero	No estoy seguro/a	Verdadero	verdadero	Verdadero	Verdadero	Falso	Falso	Verdadero	TODAVÍA NO CONOCEMOS LA EVOLUCIÓN Y COMPORTAMIENTO REAL DE ESTE VIRUS POR LO QUE EL CUIDADO DEBE SER ESTRICTO AUNQUE PAREZCA EXAGERADO.
Quito	Quito	26	Masculino	UCE	Pedagogía en la Historia y las Ciencias Sociales	4-6	COVID-19	Creado en laboratorio	Un complot mediático	51 - 100	No estoy seguro/a	Verdadero	Verdadero	Verdadero	Falso	Falso	Verdadero	Verdadero	Verdadero	Verdadero	Verdadero	Verdadero	Verdadero	Verdadero	No estoy seguro/a	No estoy seguro/a	No estoy seguro/a	Verdadero	No estoy seguro/a	Verdadero	Verdadero	Falso	Falso	Verdadero
Quito	Latacunga	27	Masculino	UCE	Ingeniería Civil	1-3	SARS-COV-2	Creado en laboratorio	Un compuesto químico	51 - 100	Verdadero	Verdadero	Falso	Verdadero	Verdadero	Falso	Verdadero	Verdadero	Verdadero	Verdadero	Verdadero	Verdadero	Verdadero	Verdadero	Verdadero	Verdadero	Falso	Verdadero	Falso	Verdadero	Falso	verdadero	Verdadero	Verdadero
Quito	Latacunga	18	Masculino	UCE	Escénicas		SARS-COV-2	Creado en laboratorio	Un compuesto químico	41 - 50	No estoy seguro/a	Verdadero	Verdadero	Verdadero	Verdadero	Falso	Verdadero	Falso	Verdadero	Falso	Verdadero	Verdadero	Verdadero	Verdadero	No estoy seguro/a	No estoy seguro/a	Verdadero	Falso	Falso	Verdadero	Verdadero	Falso	Falso	Verdadero
Latacunga	Latacunga	18	Femenino	UCE	Derecho	1-3	SARS-COV-2	Creado en laboratorio	No estoy seguro/a	No estoy seguro/a	Falso	Verdadero	Verdadero	Verdadero	Verdadero	Falso	Verdadero	Verdadero	Verdadero	Verdadero	Verdadero	Verdadero	Verdadero	Verdadero	Falso	No estoy seguro/a	No estoy seguro/a	Falso	Falso	Falso	Verdadero	Falso	Falso	Verdadero
Quito	Quito	25	Femenino	UCE	Ingeniería Agronómica	7-9	COVID-19	Creado en laboratorio	Una entidad viva	31 - 40	Falso	Verdadero	Verdadero	Verdadero	Falso	Falso	Verdadero	Falso	Verdadero	Verdadero	Verdadero	Verdadero	Verdadero	Verdadero	Falso	Falso	Verdadero	Falso	Falso	Verdadero	Verdadero	Falso	Falso	Verdadero
Quito	Quito	21	Femenino	UCE	Bioquímica y farmacia	1-3	COVID-19	De origen natural	Una entidad viva	1 - 10	Falso	Verdadero	Verdadero	Verdadero	No estoy seguro/a	Falso	Verdadero	Falso	Verdadero	Verdadero	Verdadero	Verdadero	Verdadero	Verdadero	Falso	Verdadero	Falso	Falso	Falso	Verdadero	Verdadero	Falso	Verdadero	Verdadero
Quito	Quito	21	Masculino	UCE	Finanzas	4-6	SARS-COV-2	De origen natural	Un compuesto químico	No estoy seguro/a	No estoy seguro/a	Verdadero	Verdadero	Verdadero	Falso	Falso	Verdadero	Falso	Verdadero	Verdadero	Verdadero	Verdadero	Verdadero	Verdadero	Verdadero	No estoy seguro/a	Verdadero	Falso	Falso	No estoy seguro/a	Verdadero	Falso	Falso	Verdadero
Santo Domingo	Santo Domingo	18	Femenino	UCE	Odontología	1-3	SARS-COV-2	Creado en laboratorio	Una entidad viva	11 - 20	Falso	Verdadero	Verdadero	Verdadero	Falso	Falso	Verdadero	Verdadero	Verdadero	Verdadero	Verdadero	Verdadero	Verdadero	Verdadero	Falso	No estoy seguro/a	Falso	Falso	Falso	Verdadero	Falso	Falso	Falso	Verdadero
Quito	Quito	23	Femenino	UCE	Medicina veterinaria	1-3	SARS-COV-2	De origen natural	Una entidad viva	11 - 20	Verdadero	Verdadero	Verdadero	Verdadero	Verdadero	Falso	Verdadero	Verdadero	Verdadero	Verdadero	Verdadero	Verdadero	Verdadero	Verdadero	Falso	Verdadero	Verdadero	Falso	Falso	Falso	Verdadero	Falso	Verdadero	Verdadero
Quito	Pedro Vicente Maldonado	24	Femenino	UCE	Ingenieria Agronomica	4-6	SARS-COV-2	Creado en laboratorio	Una entidad viva	31 - 40	Falso	Verdadero	Verdadero	Verdadero	Falso	Falso	Verdadero	Falso	Verdadero	Verdadero	Verdadero	Verdadero	Verdadero	Verdadero	Falso	Verdadero	Falso	Falso	Falso	Verdadero	Verdadero	Falso	Falso	Verdadero
Latacunga	Latacunga	18	Femenino	UCE	Odontología	1-3	SARS-COV-2	Creado en laboratorio	No estoy seguro/a	No estoy seguro/a	No estoy seguro/a	No estoy seguro/a	No estoy seguro/a	Verdadero	No estoy seguro/a	Falso	Verdadero	No estoy seguro/a	Verdadero	Verdadero	Verdadero	Verdadero	Verdadero	Verdadero	No estoy seguro/a	Verdadero	Verdadero	Falso	Falso	No estoy seguro/a	Verdadero	Falso	No estoy seguro/a	Verdadero
Cuenca	Cuenca	19	Femenino	UCE	Ingeniería química	1-3	COVID-19	Creado en laboratorio	No estoy seguro/a	11 - 20	Verdadero	Verdadero	Verdadero	Verdadero	Falso	Falso	Verdadero	Falso	Verdadero	Verdadero	Verdadero	Verdadero	Verdadero	Verdadero	No estoy seguro/a	Verdadero	Falso	Falso	verdadero	Falso	Verdadero	verdadero	Falso	No estoy seguro/a
Rural	Quito	18	Masculino	UCE	Sistemas de Informacion	1-3	SARS-COV-2	Creado en laboratorio	Un compuesto químico	1 - 10	Falso	Verdadero	Verdadero	Verdadero	Verdadero	Falso	Verdadero	Verdadero	Verdadero	Verdadero	Verdadero	Verdadero	Verdadero	Verdadero	Falso	Falso	No estoy seguro/a	Verdadero	Falso	Verdadero	Falso	No estoy seguro/a	Falso	Verdadero
Quito	Quito	23	Femenino	UCE	Radiología	4-6	SARS-COV-2	Creado en laboratorio	Una entidad viva	31 - 40	Verdadero	Verdadero	Verdadero	Verdadero	Falso	Falso	Verdadero	Verdadero	Verdadero	Verdadero	Verdadero	Verdadero	Verdadero	Verdadero	Verdadero	Falso	Verdadero	Falso	Falso	Verdadero	Verdadero	Falso	Verdadero	Verdadero
QUITO	QUITO	25	Masculino	UCE	BIOQUÍMICA Y FARMACIA	1-3	COVID-19	De origen natural	Una entidad viva	No estoy seguro/a	No estoy seguro/a	Verdadero	Verdadero	Verdadero	Falso	Falso	Verdadero	No estoy seguro/a	Verdadero	Verdadero	Verdadero	Verdadero	Verdadero	Verdadero	Falso	No estoy seguro/a	Verdadero	Verdadero	Falso	Falso	Verdadero	Falso	Falso	Verdadero
Francisco de orellana	Putumayo	28	Femenino	UCE	psicologia clinica	7-9	SARS-COV-2	Creado en laboratorio	Un compuesto químico	No estoy seguro/a	Verdadero	Verdadero	No estoy seguro/a	Verdadero	Falso	Falso	Verdadero	Falso	Verdadero	Verdadero	Verdadero	Verdadero	Verdadero	Verdadero	No estoy seguro/a	Falso	Verdadero	Falso	Falso	Verdadero	No estoy seguro/a	Falso	Falso	Verdadero
Santo Domingo	Santo Domingo de los Tsáchilas	21	Masculino	UCE	Ingeniería civil	1-3	SARS-COV-2	De origen natural	Un compuesto químico	31 - 40	Falso	Verdadero	Verdadero	Verdadero	Falso	Falso	Verdadero	Verdadero	Verdadero	Verdadero	Verdadero	Verdadero	Verdadero	Verdadero	Falso	Falso	Falso	Falso	Falso	Falso	Falso	Falso	Falso	Verdadero
Latacunga	Latacunga	21	Femenino	UCE	Arquitectura	7-9	SARS-COV-2	De origen natural	Una entidad viva	1 - 10	Verdadero	Verdadero	Verdadero	Verdadero	Falso	Falso	Verdadero	Falso	Verdadero	Verdadero	Verdadero	Verdadero	Verdadero	Verdadero	No estoy seguro/a	Verdadero	Verdadero	Falso	Falso	Falso	Verdadero	Falso	Falso	Verdadero
Quito	La union	22	Femenino	UCE	Artes plasticas	4-6	COVID-19	De origen natural	Una entidad viva	41 - 50	Verdadero	Verdadero	Verdadero	Verdadero	Falso	Falso	Verdadero	Verdadero	Verdadero	Verdadero	Verdadero	Verdadero	Verdadero	Verdadero	No estoy seguro/a	No estoy seguro/a	No estoy seguro/a	Verdadero	Falso	Falso	Falso	Falso	Verdadero	Verdadero
Quito	Loja	26	Femenino	UCE	Laboratorio clínico	4-6	SARS-COV-2	De origen natural	Una entidad viva	No estoy seguro/a	Verdadero	Verdadero	Verdadero	Verdadero	Verdadero	Falso	Verdadero	Falso	Verdadero	Verdadero	Verdadero	Verdadero	Verdadero	Verdadero	Falso	Verdadero	Verdadero	Falso	Falso	No estoy seguro/a	No estoy seguro/a	Falso	Falso	Verdadero
Quito	Quito	41	Masculino	UCE	Comunicación Social	7-9	SARS-COV-2	Creado en laboratorio	Un complot mediático	1 - 10	Verdadero	Verdadero	Falso	Verdadero	Falso	Falso	Falso	Falso	Falso	Falso	Falso	Falso	Falso	Falso	Verdadero	Verdadero	Verdadero	Falso	verdadero	Verdadero	Verdadero	verdadero	Falso	Falso	La universidad debe luchar por que este gran engaño deje de ser divulgado
Quito	Cuba	25	Femenino	UCE	Medicina	4-6	SARS-COV-2	De origen natural	Una entidad viva	1 - 10	Verdadero	Verdadero	Verdadero	Verdadero	Verdadero	Falso	Verdadero	Falso	Verdadero	No estoy seguro/a	Verdadero	Verdadero	Verdadero	Verdadero	Falso	Verdadero	Verdadero	Falso	Falso	No estoy seguro/a	No estoy seguro/a	Falso	Falso	Verdadero
Latacunga	Latacunga	19	Femenino	UCE	Ingenieria civil	1-3	SARS-COV-2	De origen natural	No estoy seguro/a	No estoy seguro/a	No estoy seguro/a	Verdadero	Verdadero	Verdadero	Falso	Falso	No estoy seguro/a	Falso	Verdadero	Verdadero	Verdadero	Verdadero	No estoy seguro/a	No estoy seguro/a	Verdadero	Falso	Verdadero	Falso	Falso	Verdadero	Verdadero	Falso	Falso	Verdadero
Quito	Quito	20	Masculino	UCE	Derecho	4-6	SARS-COV-2	Creado en laboratorio	Una entidad viva	1 - 10	Falso	Verdadero	Verdadero	Verdadero	Falso	Falso	Verdadero	Verdadero	Verdadero	Verdadero	Verdadero	Verdadero	Verdadero	Verdadero	Verdadero	No estoy seguro/a	No estoy seguro/a	Falso	No estoy seguro/a	Verdadero	Falso	Falso	Falso	Verdadero
Quito	Quito	23	Femenino	UCE	Sociología	7-9	No estoy seguro/a	De origen natural	Una entidad viva	21 - 30	Verdadero	No estoy seguro/a	No estoy seguro/a	Verdadero	No estoy seguro/a	Falso	No estoy seguro/a	No estoy seguro/a	Verdadero	Verdadero	Verdadero	Verdadero	Verdadero	Verdadero	No estoy seguro/a	No estoy seguro/a	No estoy seguro/a	Falso	No estoy seguro/a	Falso	Verdadero	Falso	Falso	Verdadero
Quito	Quito	20	Masculino	UCE	Pedagogía de los idiomas nacionales y extranjeros	4-6	SARS-COV-2	No estoy seguro/a	No estoy seguro/a	No estoy seguro/a	Verdadero	Verdadero	Verdadero	Verdadero	Falso	Falso	Verdadero	Verdadero	Verdadero	Verdadero	Verdadero	Verdadero	Verdadero	Verdadero	No estoy seguro/a	Falso	Verdadero	Falso	Falso	No estoy seguro/a	Verdadero	Falso	No estoy seguro/a	Verdadero
Quito	Quito	19	Femenino	UCE	Administración Pública	1-3	MERS-19	Creado en laboratorio	Un complot mediático	1 - 10	No estoy seguro/a	Verdadero	Verdadero	Verdadero	Falso	Falso	Verdadero	Falso	Verdadero	Verdadero	Verdadero	Verdadero	Verdadero	No estoy seguro/a	Verdadero	Falso	Falso	Falso	verdadero	Verdadero	Verdadero	Falso	Falso	Verdadero
Quito	Cuba	25	Femenino	UCE	Medicina	4-6	SARS-COV-2	De origen natural	Una entidad viva	1 - 10	Verdadero	Verdadero	Verdadero	Verdadero	Verdadero	Falso	Verdadero	Falso	Verdadero	No estoy seguro/a	Verdadero	Verdadero	Verdadero	Verdadero	Falso	Verdadero	Verdadero	Falso	Falso	No estoy seguro/a	No estoy seguro/a	Falso	Falso	Verdadero
Quito	Quito	24	Femenino	UCE	LICENCIATURA EN PSICOLOGÍA	1-3	SARS-COV-2	De origen natural	Una entidad viva	1 - 10	Verdadero	Verdadero	Verdadero	Verdadero	Falso	Falso	Verdadero	Falso	Verdadero	Verdadero	Verdadero	Verdadero	Verdadero	Verdadero	No estoy seguro/a	Verdadero	Verdadero	Falso	Falso	Verdadero	No estoy seguro/a	Falso	No estoy seguro/a	Verdadero
Quito	Quito	21	Masculino	UCE	Administración de empresas	7-9	SARS-COV-2	De origen natural	Un compuesto químico	1 - 10	Verdadero	Verdadero	Falso	Verdadero	Falso	Falso	Verdadero	Verdadero	Verdadero	Verdadero	Verdadero	Verdadero	Verdadero	Verdadero	Falso	Verdadero	Verdadero	Falso	Falso	Verdadero	Verdadero	Falso	Verdadero	Verdadero
Salcedo	Salcedo	24	Masculino	UCE	Ingenieria Civil	1-3	SARS-COV-2	De origen natural	No estoy seguro/a	1 - 10	Verdadero	Verdadero	Verdadero	Verdadero	Falso	Falso	Verdadero	Falso	Verdadero	Verdadero	Verdadero	Verdadero	Verdadero	Verdadero	Falso	No estoy seguro/a	No estoy seguro/a	Falso	Falso	Falso	Falso	Falso	Falso	Verdadero
Quito	comunidad Atapo el Carmen	25	Masculino	UCE	Artes Musicales	1-3	COVID-19	Creado en laboratorio	No estoy seguro/a	21 - 30	Falso	Verdadero	Verdadero	Verdadero	No estoy seguro/a	Falso	Verdadero	Falso	Verdadero	Verdadero	Verdadero	Verdadero	Verdadero	Verdadero	Falso	Falso	Verdadero	Verdadero	Falso	No estoy seguro/a	Falso	Falso	Verdadero	Verdadero
Quito	Quito	22	Femenino	UCE	Enfermería	4-6	SARS-COV-2	De origen natural	Una entidad viva	1 - 10	Verdadero	Verdadero	Verdadero	Verdadero	Verdadero	Falso	Verdadero	Verdadero	Verdadero	Verdadero	Verdadero	Verdadero	Falso	Verdadero	Verdadero	Falso	Falso	Falso	Falso	Falso	Falso	Falso	Verdadero	Verdadero
Quito	Quito	33	Femenino	UCE	Química Y biología	4-6	COVID-19	Creado en laboratorio	Una entidad viva	No estoy seguro/a	Verdadero	Verdadero	No estoy seguro/a	Verdadero	Falso	Falso	Falso	Falso	Verdadero	Verdadero	Verdadero	Verdadero	Verdadero	Verdadero	Falso	Verdadero	Falso	Falso	Falso	No estoy seguro/a	Verdadero	No estoy seguro/a	Falso	Verdadero	ninguna
Sangolquí	Chone	18	Femenino	UCE	Química	1-3	SARS-COV-2	De origen natural	Un complot mediático	31 - 40	Verdadero	Verdadero	Verdadero	Verdadero	Verdadero	Falso	Verdadero	Falso	Verdadero	Verdadero	Verdadero	Verdadero	Falso	Verdadero	Verdadero	Falso	Verdadero	Verdadero	Falso	Verdadero	Verdadero	Falso	Falso	Verdadero	Ayuden a las fundaciones de animalitos :((( no tienen dinero para darles comida y no es justo que por el covid queden desamparados :c ...si todos donamos de un dolar eso ya significan mucho... por más pancitas llenas y felices :´)
Quito	Quito	22	Femenino	UCE	Pedagogía de la lengua y literatura	4-6	COVID-19	Creado en laboratorio	Un compuesto químico	No estoy seguro/a	Falso	Verdadero	No estoy seguro/a	Verdadero	Falso	Verdadero	Verdadero	Falso	Verdadero	Verdadero	Verdadero	Verdadero	Verdadero	Verdadero	No estoy seguro/a	No estoy seguro/a	Falso	Falso	Falso	Falso	Falso	Falso	Falso	Verdadero
Quito	Quito	20	Masculino	UCE	Agronomía	1-3	No estoy seguro/a	Creado en laboratorio	No estoy seguro/a	11 - 20	No estoy seguro/a	No estoy seguro/a	Verdadero	Verdadero	Falso	No estoy seguro/a	No estoy seguro/a	Verdadero	Verdadero	Verdadero	Verdadero	Verdadero	Verdadero	Verdadero	No estoy seguro/a	No estoy seguro/a	No estoy seguro/a	No estoy seguro/a	Falso	No estoy seguro/a	Verdadero	Falso	Falso	Verdadero
Quito	Quito	28	Femenino	UCE	Contabilidad y Auditoria	9 en adelante	SARS-COV-2	De origen natural	Una entidad viva	No estoy seguro/a	Verdadero	Verdadero	Verdadero	Verdadero	Falso	Falso	Verdadero	Falso	Verdadero	Verdadero	Verdadero	Verdadero	Verdadero	Verdadero	Falso	Verdadero	Verdadero	Falso	Falso	Falso	No estoy seguro/a	verdadero	Falso	Verdadero
Quito	Quito	26	Masculino	UCE	Ciencias Biológicas y Ambientales	7-9	SARS-COV-2	De origen natural		No estoy seguro/a	Verdadero	Verdadero	Verdadero	Verdadero	Falso	Falso	Verdadero	Falso	Verdadero	Verdadero	Verdadero	Verdadero	Verdadero	Verdadero	Falso	Falso	Verdadero	Falso	Falso	Falso	Falso	Falso	Falso	Verdadero
Quevedo	Quito	21	Masculino	UCE	Ing. Sistemas	1-3	SARS-COV-2	Creado en laboratorio	Una entidad capaz de adaptarse y evolucionar	41 - 50	No estoy seguro/a	Verdadero	Verdadero	Verdadero	Verdadero	Falso	Verdadero	Verdadero	Verdadero	Verdadero	Verdadero	Verdadero	Verdadero	Verdadero	Verdadero	No estoy seguro/a	Verdadero	Falso	Falso	Falso	Verdadero	Falso	Falso	Verdadero
Quito	Quito	22	Masculino	UCE	Bioquímica y Farmacia	4-6	SARS-COV-2	De origen natural	Una entidad capaz de adaptarse y evolucionar	1 - 10	Verdadero	Verdadero	Verdadero	Verdadero	Falso	Falso	Verdadero	No estoy seguro/a	Verdadero	Verdadero	Verdadero	Verdadero	Verdadero	Verdadero	Falso	No estoy seguro/a	Verdadero	Falso	Falso	Falso	Verdadero	Falso	No estoy seguro/a	Verdadero	Formular mejor algunas de las preguntas.
Quito	Quito	26	Femenino	UCE	Bioquímica Clínica	9 en adelante	SARS-COV-2	De origen natural	Una entidad capaz de adaptarse y evolucionar	1 - 10	Verdadero	Verdadero	Verdadero	Verdadero	Falso	Falso	Verdadero	Verdadero	Verdadero	Verdadero	Verdadero	Verdadero	Verdadero	Verdadero	Falso	Verdadero	Verdadero	Falso	Falso	Verdadero	Verdadero	Falso	Falso	Verdadero	Las preguntas no son parciales.
San Miguel de los Bancos	San Miguel de los Bancos	23	Femenino	UCE	Bioquímica clínica	7-9	SARS-COV-2	De origen natural	Una entidad capaz de adaptarse y evolucionar	11 - 20	Verdadero	Falso	Verdadero	Verdadero	Verdadero	Falso	Verdadero	Falso	Verdadero	Verdadero	Verdadero	Verdadero	Verdadero	Verdadero	Falso	Verdadero	Verdadero	Falso	Falso	Falso	Falso	Falso	Falso	Verdadero	Preguntas sobre el conocimiento de la inmunidad pasiva por anticuerpos generados en pacientes curados y si en el país se realiza este tratamiento
Ambato	Ambato	21	Femenino	UCE	Recursos Naturales Renovables	1-3	SARS-COV-2	De origen natural	Una entidad capaz de adaptarse y evolucionar	1 - 10	Verdadero	Verdadero	Verdadero	Verdadero	Falso	Falso	Verdadero	Falso	Verdadero	Verdadero	Verdadero	Verdadero	Verdadero	Verdadero	Verdadero	No estoy seguro/a	Verdadero	Falso	Falso	Falso	Verdadero	Falso	Falso	Verdadero
Quito	Quito	22	Femenino	UCE	Bioquimica	4-6	SARS-COV-2	Creado en laboratorio	Una entidad capaz de adaptarse y evolucionar	11 - 20	Verdadero	Verdadero	Verdadero	Verdadero	Falso	Falso	Verdadero	Verdadero	Verdadero	Verdadero	Verdadero	Verdadero	Verdadero	Verdadero	Falso	Verdadero	Verdadero	Falso	Falso	Falso	Verdadero	Falso	Falso	Verdadero
Quito	Quito	23	Masculino	UCE	Ingeniería Química	7-9	SARS-COV-2	De origen natural	Una entidad capaz de adaptarse y evolucionar	1 - 10	No estoy seguro/a	Verdadero	Verdadero	Verdadero	Falso	Falso	Verdadero	Falso	Verdadero	Verdadero	Verdadero	Verdadero	Verdadero	Verdadero	No estoy seguro/a	Verdadero	Verdadero	Falso	Falso	Falso	Verdadero	verdadero	Falso	Verdadero
Quito	Quito	23	Femenino	UCE	Ingenieria Quimica	7-9	SARS-COV-2	No estoy seguro/a	Una entidad capaz de adaptarse y evolucionar	1 - 10	No estoy seguro/a	No estoy seguro/a	Verdadero	Verdadero	No estoy seguro/a	Falso	Verdadero	No estoy seguro/a	No estoy seguro/a	Verdadero	Verdadero	Verdadero	Verdadero	Verdadero	No estoy seguro/a	Verdadero	Verdadero	Falso	Falso	No estoy seguro/a	No estoy seguro/a	Falso	Falso	Verdadero
Quito	Quito	18	Masculino	UCE	Química Rediseño	1-3	SARS-COV-2	No estoy seguro/a	No estoy seguro/a	No estoy seguro/a	No estoy seguro/a	Verdadero	No estoy seguro/a	Verdadero	Falso	Falso	Verdadero	Falso	Verdadero	Verdadero	Verdadero	Verdadero	Verdadero	Verdadero	No estoy seguro/a	No estoy seguro/a	Verdadero	Falso	Falso	Falso	No estoy seguro/a	Falso	Falso	Verdadero
Ambato	Ambato	24	Femenino	UCE	Administración de empresas	1-3	SARS-COV-2	No estoy seguro/a	No estoy seguro/a	1 - 10	Verdadero	Verdadero	Verdadero	Verdadero	Falso	Falso	Verdadero	Verdadero	Verdadero	No estoy seguro/a	Verdadero	Verdadero	Verdadero	Verdadero	Falso	Verdadero	Verdadero	Falso	Falso	No estoy seguro/a	Falso	Falso	Falso	Verdadero
Quito	Quito	29	Masculino	UCE	Turismo Ecológico	9 en adelante	SARS-COV-2	Creado en laboratorio	Una entidad capaz de adaptarse y evolucionar	1 - 10	Verdadero	Verdadero	Verdadero	Verdadero	Falso	Falso	Verdadero	Falso	Verdadero	Verdadero	Verdadero	Verdadero	Verdadero	Verdadero	Falso	No estoy seguro/a	Verdadero	Falso	Falso	Verdadero	Verdadero	Falso	Falso	Verdadero
Quito	Quito	31	Femenino	UCE	Enfermeria	7-9	SARS-COV-2	De origen natural	Una entidad capaz de adaptarse y evolucionar	11 - 20	Verdadero	Verdadero	Verdadero	Verdadero	Falso	Falso	Verdadero	Verdadero	Verdadero	Verdadero	Verdadero	Verdadero	Verdadero	Verdadero	Falso	Verdadero	Verdadero	Falso	Falso	Falso	Falso	Falso	Falso	Verdadero
Quito	Quito	21	Femenino	UCE	Derecho	1-3	SARS-COV-2	Creado en laboratorio	Una entidad capaz de adaptarse y evolucionar	11 - 20	Verdadero	Verdadero	Falso	Verdadero	Falso	Falso	Verdadero	Falso	Verdadero	Verdadero	Verdadero	Verdadero	Verdadero	Verdadero	No estoy seguro/a	Verdadero	Verdadero	Falso	Falso	Falso	Falso	Falso	Falso	Verdadero
Quito	Quito	25	Masculino	UCE	Ingeniería Química	7-9	SARS-COV-2	De origen natural	Una entidad capaz de adaptarse y evolucionar	No estoy seguro/a	No estoy seguro/a	Verdadero	Verdadero	Verdadero	Falso	Falso	Verdadero	Verdadero	Verdadero	Verdadero	Verdadero	Verdadero	Verdadero	Verdadero	No estoy seguro/a	Verdadero	Verdadero	Falso	Falso	No estoy seguro/a	No estoy seguro/a	Falso	Falso	Verdadero
Quito	Quito	23	Femenino	UCE	Contabilidad y Auditoría	9 en adelante	SARS-COV-2	De origen natural	Una entidad capaz de adaptarse y evolucionar	1 - 10	Falso	Verdadero	Verdadero	Verdadero	Falso	Falso	Verdadero	No estoy seguro/a	Verdadero	No estoy seguro/a	Verdadero	Verdadero	Verdadero	Verdadero	No estoy seguro/a	No estoy seguro/a	Verdadero	Falso	Falso	No estoy seguro/a	Verdadero	Falso	Falso	Verdadero
Quito	Quito	24	Femenino	UCE	Ingeniería Química	9 en adelante	SARS-COV-2	De origen natural	Una entidad capaz de adaptarse y evolucionar	1 - 10	No estoy seguro/a	Verdadero	Verdadero	Verdadero	Falso	Falso	Verdadero	Verdadero	Verdadero	Verdadero	Verdadero	Verdadero	Verdadero	Verdadero	Falso	No estoy seguro/a	Verdadero	Falso	Falso	Verdadero	Verdadero	Falso	Falso	Verdadero
Quito	Quito	31	Femenino	UCE	Enfermeria	7-9	SARS-COV-2	De origen natural	Una entidad capaz de adaptarse y evolucionar	11 - 20	Verdadero	Verdadero	Verdadero	Verdadero	Falso	Falso	Verdadero	Verdadero	Verdadero	Verdadero	Verdadero	Verdadero	Verdadero	Verdadero	Falso	Verdadero	Verdadero	Falso	Falso	Falso	Falso	Falso	Falso	Verdadero
Quito	Quito Ecuador	20	Femenino	UCE	Educación básica	1-3	COVID-19	Creado en laboratorio	Una entidad capaz de adaptarse y evolucionar	11 - 20	Verdadero	Verdadero	Verdadero	Verdadero	Verdadero	Verdadero	Verdadero	Verdadero	Verdadero	Falso	Falso	Falso	Verdadero	No estoy seguro/a	Verdadero	Verdadero	Falso	Verdadero	verdadero	Verdadero	Falso	Falso	Verdadero	Verdadero	Ah quedarse en casa. Y si salen obviamente debe ir protegida con mascarilla y guantes y overol y lentes
Quito	Quito	18	Masculino	UCE	Pedagogía en las ciencias experimentales química y biología	1-3	SARS-COV-2	No estoy seguro/a	Una entidad capaz de adaptarse y evolucionar	No estoy seguro/a	No estoy seguro/a	Verdadero	Verdadero	Verdadero	Falso	Falso	Verdadero	Falso	Verdadero	Verdadero	Verdadero	Verdadero	Verdadero	Verdadero	No estoy seguro/a	Verdadero	Verdadero	Falso	Falso	No estoy seguro/a	Verdadero	Falso	Falso	Verdadero
Cayambe	Cayambe	24	Masculino	UCE	Computación	1-3	SARS-COV-2	De origen natural	Una entidad capaz de adaptarse y evolucionar	1 - 10	Verdadero	Verdadero	Verdadero	Verdadero	Falso	Falso	Verdadero	Falso	Verdadero	Verdadero	Verdadero	Verdadero	Verdadero	Verdadero	Falso	Verdadero	Verdadero	Falso	Falso	Falso	Verdadero	Falso	Falso	Verdadero
Cayambe	Cayambe	24	Masculino	UCE	Pedagogía del Inglés	9 en adelante	COVID-19	Creado en laboratorio	Una entidad capaz de adaptarse y evolucionar	No estoy seguro/a	Falso	No estoy seguro/a	Verdadero	Verdadero	Falso	Falso	Verdadero	Verdadero	Verdadero	Verdadero	Verdadero	No estoy seguro/a	Verdadero	Verdadero	Verdadero	No estoy seguro/a	Verdadero	Falso	Falso	No estoy seguro/a	Verdadero	Falso	Falso	Verdadero
Ibarra	Ibarra	25	Femenino	UCE	Ingeniería Civil	1-3	SARS-COV-2	Creado en laboratorio	Una entidad capaz de adaptarse y evolucionar	11 - 20	No estoy seguro/a	Verdadero	Verdadero	Falso	Falso	Falso	Verdadero	Verdadero	Verdadero	Verdadero	Verdadero	Verdadero	No estoy seguro/a	Verdadero	Falso	Verdadero	Verdadero	Falso	No estoy seguro/a	No estoy seguro/a	Verdadero	Falso	Falso	Verdadero
Ambato	Ambato	22	Femenino	UCE	Ciencias Políticas	1-3	SARS-COV-2	De origen natural	Una entidad capaz de adaptarse y evolucionar	51 - 100	Verdadero	Verdadero	Verdadero	Verdadero	Falso	Falso	Verdadero	Falso	Verdadero	Verdadero	Verdadero	Verdadero	Verdadero	Verdadero	No estoy seguro/a	No estoy seguro/a	Verdadero	Falso	Falso	Falso	Falso	Falso	Falso	Verdadero
Quito	Quito	22	Femenino	UCE	Contabilidad y Auditoría	4-6	SARS-COV-2	Creado en laboratorio	Una entidad capaz de adaptarse y evolucionar	41 - 50	Falso	Verdadero	Verdadero	Verdadero	Falso	Falso	Verdadero	Verdadero	Verdadero	Verdadero	Verdadero	Verdadero	Verdadero	Verdadero	Falso	No estoy seguro/a	Falso	Falso	No estoy seguro/a	Falso	Verdadero	Falso	Falso	Verdadero	La encuesta muy buena aunque creo que podrían poner más preguntas ;)
Sangolquí	Sangolquí	27	Masculino	UCE	Administración de Empresas	7-9	SARS-COV-2	De origen natural	Una entidad capaz de adaptarse y evolucionar	11 - 20	Falso	Verdadero	Verdadero	Verdadero	Falso	Falso	Verdadero	Falso	Verdadero	Verdadero	Verdadero	Verdadero	Verdadero	Verdadero	No estoy seguro/a	No estoy seguro/a	Verdadero	Verdadero	No estoy seguro/a	Falso	Verdadero	Falso	Falso	Verdadero	Por favor analizar más a fondo todo lo referente a la pandemia y compartirlo de esta misma forma.
Quito	Santo Domingo	21	Masculino	UCE	Arquitectura	4-6	SARS-COV-2	De origen natural	Una entidad capaz de adaptarse y evolucionar	11 - 20	Verdadero	Verdadero	Verdadero	Verdadero	Verdadero	Falso	Verdadero	Verdadero	Verdadero	Verdadero	Verdadero	Verdadero	Verdadero	Verdadero	Verdadero	Verdadero	Verdadero	Falso	Falso	Falso	Verdadero	Falso	Falso	Verdadero
Quito	Quito	21	Femenino	UCE	Pedagogía de los idiomas nacionales y extranjeros- ingles	4-6	No estoy seguro/a	De origen natural	Una entidad capaz de adaptarse y evolucionar	41 - 50	Verdadero	Verdadero	Verdadero	Verdadero	Falso	Falso	Verdadero	Verdadero	Verdadero	Verdadero	Verdadero	Verdadero	Verdadero	Verdadero	Falso	No estoy seguro/a	Verdadero	Falso	Falso	Verdadero	Verdadero	Falso	Falso	Verdadero
Quito	Quito	23	Masculino	UCE	Ingeniería en sistemas	4-6	SARS-COV-2	De origen natural	Una entidad capaz de adaptarse y evolucionar	21 - 30	Verdadero	Verdadero	Verdadero	Verdadero	Falso	Falso	Verdadero	Falso	Verdadero	Verdadero	Verdadero	Verdadero	Verdadero	Verdadero	Verdadero	Verdadero	Verdadero	Falso	Falso	Falso	Verdadero	Falso	Falso	Verdadero
Quito	Quito	25	Masculino	UCE	Medicina	7-9	SARS-COV-2	De origen natural	Una entidad capaz de adaptarse y evolucionar	1 - 10	Verdadero	Verdadero	Verdadero	Verdadero	Falso	Falso	Verdadero	Falso	Verdadero	Verdadero	Verdadero	Verdadero	Verdadero	Verdadero	Falso	Verdadero	Verdadero	Falso	Falso	Falso	Verdadero	Falso	Falso	Verdadero
Quito	Huambalò	23	Masculino	UCE	Medicina Veterinaria y Zootecnia	7-9	SARS-COV-2	De origen natural	Una entidad capaz de adaptarse y evolucionar	1 - 10	Verdadero	Verdadero	Verdadero	Verdadero	Falso	Falso	Verdadero	Verdadero	Verdadero	Verdadero	Verdadero	Verdadero	Verdadero	Verdadero	Falso	Verdadero	Verdadero	Falso	Falso	Falso	Verdadero	verdadero	Falso	Verdadero	Mas que contar numero, correr cifras, el gobierno deberìa hacer campañas de inmunización, de prevenciòn.En la medicina veterinaria cuando un paciente esta en procesos virales lo que se hace es reforzar el sistema inmunològico. En este caso al tratarse de un coronavirus, lo ideal es tener un sistema inmune alto, control de patógenos oportunistas como bacterias, y una buena alimentaciòn. Deberían c…
Otavalo	Ibarra	24	Femenino	UCE	Odontología	9 en adelante	SARS-COV-2	No estoy seguro/a	Una entidad capaz de adaptarse y evolucionar	1 - 10	Verdadero	Verdadero	Verdadero	Verdadero	Falso	Falso	Verdadero	Verdadero	Verdadero	Verdadero	Verdadero	Verdadero	Verdadero	Verdadero	Falso	Verdadero	Verdadero	Falso	Falso	Falso	No estoy seguro/a	Falso	Falso	Verdadero
Quito	Quito	20	Masculino	UCE	Administración de empresas	1-3	No estoy seguro/a	Creado en laboratorio	Una entidad capaz de adaptarse y evolucionar	51 - 100	No estoy seguro/a	Verdadero	Verdadero	Verdadero	Falso	Falso	No estoy seguro/a	Verdadero	Verdadero	Verdadero	Verdadero	Verdadero	Verdadero	Verdadero	Verdadero	No estoy seguro/a	No estoy seguro/a	Falso	Falso	Verdadero	Verdadero	Falso	Falso	Verdadero
Mejía	Quito	23	Masculino	UCE	BIología	1-3	SARS-COV-2	De origen natural	Una entidad capaz de adaptarse y evolucionar	1 - 10	Falso	Verdadero	Verdadero	Verdadero	Falso	Falso	Verdadero	Verdadero	Verdadero	Verdadero	Verdadero	Verdadero	Verdadero	Verdadero	Falso	No estoy seguro/a	Falso	Falso	Falso	Falso	Verdadero	Falso	Falso	Verdadero
Quito	Quito	19	Femenino	UCE	Agronomia	1-3	SARS-COV-2	Creado en laboratorio	Una entidad capaz de adaptarse y evolucionar	51 - 100	No estoy seguro/a	Verdadero	Verdadero	Verdadero	Falso	Falso	Verdadero	No estoy seguro/a	Verdadero	Verdadero	Verdadero	Verdadero	Verdadero	Verdadero	Verdadero	Verdadero	Verdadero	Falso	No estoy seguro/a	No estoy seguro/a	Verdadero	No estoy seguro/a	No estoy seguro/a	Verdadero
Quito	QUITO	21	Masculino	UCE	Asministracion publica	1-3	SARS-COV-2	De origen natural	Una entidad capaz de adaptarse y evolucionar	11 - 20	Falso	Verdadero	Verdadero	Verdadero	Falso	Falso	Verdadero	Falso	Verdadero	Verdadero	Verdadero	Verdadero	Verdadero	Verdadero	Falso	Verdadero	Verdadero	Falso	Falso	Verdadero	Falso	Falso	Falso	Verdadero	Muy buen test
Quito	Quito	24	Femenino	UCE	Diseño Industrial	7-9	COVID-19	Creado en laboratorio	Una entidad capaz de adaptarse y evolucionar	11 - 20	Verdadero	Verdadero	Verdadero	Verdadero	Falso	No estoy seguro/a	Verdadero	Verdadero	No estoy seguro/a	Verdadero	Verdadero	Verdadero	Verdadero	Verdadero	No estoy seguro/a	No estoy seguro/a	Falso	Falso	Falso	Falso	Verdadero	Falso	Falso	Verdadero
Quito	Latacunga	22	Femenino	UCE	Medicina	4-6	SARS-COV-2	De origen natural	Una entidad capaz de adaptarse y evolucionar	11 - 20	Verdadero	Verdadero	Verdadero	Verdadero	Falso	Falso	Verdadero	Falso	Verdadero	Verdadero	Verdadero	Verdadero	Verdadero	Verdadero	Falso	Verdadero	Verdadero	Falso	Falso	Falso	Verdadero	Falso	Falso	Verdadero
Quito	Morón, Cuba	20	Femenino	UCE	Ingeniería en Estadística	1-3	SARS-COV-2	Creado en laboratorio	Una entidad capaz de adaptarse y evolucionar	No estoy seguro/a	Verdadero	Verdadero	Verdadero	Verdadero	Falso	Falso	No estoy seguro/a	Falso	Verdadero	Verdadero	Verdadero	Falso	Verdadero	Verdadero	Falso	Falso	Verdadero	Falso	Falso	Falso	Falso	Falso	Falso	Verdadero
Santo Domingo	Santo Domingo de los Tsáchilas	21	Masculino	UCE	Ingeniería civil	1-3	SARS-COV-2	De origen natural	Un compuesto químico	31 - 40	Falso	Verdadero	Verdadero	Verdadero	Falso	Falso	Verdadero	Verdadero	Verdadero	Verdadero	Verdadero	Verdadero	Verdadero	Verdadero	Falso	Falso	Falso	Falso	Falso	Falso	Falso	Falso	Falso	Verdadero
Ambato	Ambato	25	Femenino	UCE	Química farmacéutica	9 en adelante	SARS-COV-2	De origen natural	Una entidad capaz de adaptarse y evolucionar	21 - 30	Verdadero	Verdadero	Verdadero	Verdadero	Falso	Falso	Verdadero	Falso	Verdadero	Verdadero	Verdadero	Verdadero	Verdadero	Verdadero	Falso	Verdadero	Verdadero	Falso	Falso	Falso	Verdadero	verdadero	Falso	Verdadero
Sangolquí	Sangolquí	24	Femenino	UCE	Bioquímica Clínica	4-6	SARS-COV-2	De origen natural	Una entidad capaz de adaptarse y evolucionar	1 - 10	Falso	Verdadero	Verdadero	Verdadero	Falso	Falso	Verdadero	Falso	Verdadero	Verdadero	Verdadero	No estoy seguro/a	Verdadero	Verdadero	No estoy seguro/a	Verdadero	Verdadero	Falso	Falso	Falso	Verdadero	Falso	Falso	Verdadero
Loja	Loja	19	Masculino	UCE	Geología	1-3	SARS-COV-2	Creado en laboratorio	Una entidad capaz de adaptarse y evolucionar	No estoy seguro/a	Verdadero	Verdadero	Verdadero	Verdadero	Falso	Falso	Verdadero	Verdadero	Verdadero	Verdadero	Verdadero	Verdadero	Verdadero	Verdadero	Falso	Verdadero	Verdadero	Falso	Falso	Verdadero	Verdadero	Falso	Falso	Verdadero
Atuntaqui	Atuntaqui	20	Femenino	UCE	Medicina	1-3	SARS-COV-2	Creado en laboratorio	Una entidad capaz de adaptarse y evolucionar	No estoy seguro/a	Verdadero	Verdadero	Verdadero	Verdadero	Falso	Falso	Verdadero	No estoy seguro/a	Verdadero	Verdadero	Verdadero	Verdadero	Verdadero	Verdadero	No estoy seguro/a	Verdadero	No estoy seguro/a	No estoy seguro/a	Falso	No estoy seguro/a	Falso	Falso	Falso	Verdadero
Quito	Quito	18	Masculino	UCE	Contabilidad y auditoría	1-3	SARS-COV-2	De origen natural	Una entidad capaz de adaptarse y evolucionar	31 - 40	Falso	Falso	Falso	Verdadero	Falso	Falso	Falso	Falso	Falso	Verdadero	Falso	Verdadero	Falso	Falso	Falso	Verdadero	Verdadero	Falso	Falso	No estoy seguro/a	Falso	Falso	Verdadero	Verdadero
Quito	Quito	18	Femenino	UCE	Trabajo Social	1-3	SARS-COV-2	Creado en laboratorio	Una entidad capaz de adaptarse y evolucionar	21 - 30	No estoy seguro/a	Verdadero	Verdadero	Verdadero	Falso	Falso	Verdadero	Falso	Verdadero	Verdadero	Verdadero	Falso	Verdadero	Verdadero	No estoy seguro/a	Verdadero	Verdadero	Falso	Falso	Verdadero	No estoy seguro/a	Falso	No estoy seguro/a	No estoy seguro/a
Quito	Quito	26	Femenino	UCE	Artes plásticas	7-9	SARS-COV-2	No estoy seguro/a	Una entidad capaz de adaptarse y evolucionar	No estoy seguro/a	Falso	Verdadero	Verdadero	Verdadero	Falso	Falso	Verdadero	No estoy seguro/a	Verdadero	Verdadero	Verdadero	Verdadero	Verdadero	Verdadero	Falso	No estoy seguro/a	Verdadero	No estoy seguro/a	Falso	Verdadero	Verdadero	Falso	Verdadero	Verdadero
quito	quito	28	Femenino	UCE	teatro	4-6	SARS-COV-2	Creado en laboratorio	No estoy seguro/a	1 - 10	No estoy seguro/a	Verdadero	Verdadero	Verdadero	No estoy seguro/a	Falso	Verdadero	No estoy seguro/a	Verdadero	Verdadero	Verdadero	Verdadero	Verdadero	Verdadero	No estoy seguro/a	No estoy seguro/a	No estoy seguro/a	Falso	Falso	Verdadero	Verdadero	Falso	Falso	Verdadero
Quito	Quito	31	Masculino	UCE	Pedagogia de los idiomas nacionales y extranjeros	7-9	COVID-19	Creado en laboratorio	Una entidad capaz de adaptarse y evolucionar	11 - 20	Falso	Verdadero	Verdadero	Verdadero	No estoy seguro/a	Falso	Verdadero	Verdadero	Verdadero	Verdadero	Verdadero	Verdadero	Verdadero	Verdadero	Falso	No estoy seguro/a	No estoy seguro/a	Verdadero	Falso	No estoy seguro/a	Verdadero	Falso	Falso	Verdadero
Huaquillas	Huaquillas	20	Masculino	UCE	Minas	1-3	No estoy seguro/a	De origen natural	Una entidad capaz de adaptarse y evolucionar	1 - 10	Verdadero	Verdadero	Verdadero	Verdadero	Falso	Falso	Verdadero	No estoy seguro/a	Verdadero	Verdadero	Verdadero	Verdadero	Verdadero	Verdadero	Falso	Falso	Verdadero	Falso	verdadero	Verdadero	Falso	Falso	Falso	Falso
Quito	Ventanas	38	Femenino	UCE	Contabilidad y auditoría	7-9	No estoy seguro/a	No estoy seguro/a	Una entidad capaz de adaptarse y evolucionar	51 - 100	Verdadero	Verdadero	Verdadero	Verdadero	Falso	Falso	Verdadero	No estoy seguro/a	Verdadero	Verdadero	Verdadero	Verdadero	Verdadero	Verdadero	Falso	No estoy seguro/a	Verdadero	Falso	Falso	No estoy seguro/a	Verdadero	Falso	Verdadero	Verdadero	Muy buena encuesta
Quito	Quito	21	Masculino	UCE	Ingeniería en Petróleos	7-9	SARS-COV-2	Creado en laboratorio	Un compuesto químico	1 - 10	Verdadero	Verdadero	Verdadero	Verdadero	Falso	Falso	Verdadero	Verdadero	Verdadero	Verdadero	Verdadero	Verdadero	Verdadero	Verdadero	No estoy seguro/a	Verdadero	Verdadero	Falso	No estoy seguro/a	Falso	Verdadero	Falso	Falso	Verdadero
quito	quito	21	Femenino	UCE	geología	1-3	SARS-COV-2	No estoy seguro/a	Una entidad capaz de adaptarse y evolucionar	1 - 10	No estoy seguro/a	Verdadero	Verdadero	Verdadero	Falso	Falso	Verdadero	Verdadero	Verdadero	Verdadero	Verdadero	Verdadero	Verdadero	Verdadero	No estoy seguro/a	Falso	Verdadero	Falso	Falso	Falso	Falso	Falso	Falso	Verdadero
Quito	Quito	20	Femenino	UCE	matemática	1-3	No estoy seguro/a	De origen natural	Una entidad capaz de adaptarse y evolucionar	11 - 20	Verdadero	Verdadero	Verdadero	Verdadero	Falso	Falso	Verdadero	Verdadero	Verdadero	Verdadero	Verdadero	Verdadero	Verdadero	Verdadero	No estoy seguro/a	Verdadero	Verdadero	Falso	verdadero	Falso	Verdadero	Falso	Falso	Verdadero
Quito	Maracay	20	Femenino	UCE	Pedagogía de los idiomas nacionales y extranjeros	1-3	SARS-COV-2	De origen natural	Una entidad capaz de adaptarse y evolucionar	No estoy seguro/a	Falso	Verdadero	Verdadero	Verdadero	No estoy seguro/a	Falso	Verdadero	Verdadero	Verdadero	Verdadero	Verdadero	Verdadero	Verdadero	Verdadero	Falso	Verdadero	No estoy seguro/a	Falso	Falso	Falso	Verdadero	Falso	Falso	Verdadero
Quito	Quito	26	Femenino	UCE	Educación Inicial Semipresencial	1-3	SARS-COV-2	Creado en laboratorio	Una entidad capaz de adaptarse y evolucionar	1 - 10	No estoy seguro/a	Verdadero	Verdadero	Verdadero	Falso	Falso	Verdadero	Falso	Verdadero	Verdadero	Verdadero	Verdadero	Verdadero	Verdadero	No estoy seguro/a	No estoy seguro/a	No estoy seguro/a	No estoy seguro/a	Falso	No estoy seguro/a	Verdadero	Falso	No estoy seguro/a	Verdadero	Se conoce que existen pacientes asintomáticos que quizá ya haya pasado la enfermedad estos se pueden volver a contagiar?
Quito	Quito	18	Femenino	UCE	Laboratorio Clínico	1-3	SARS-COV-2	De origen natural	Una entidad capaz de adaptarse y evolucionar	No estoy seguro/a	No estoy seguro/a	Verdadero	Verdadero	Verdadero	No estoy seguro/a	Falso	Verdadero	No estoy seguro/a	Verdadero	Verdadero	Verdadero	Verdadero	Verdadero	Verdadero	No estoy seguro/a	Verdadero	No estoy seguro/a	Falso	Falso	Falso	No estoy seguro/a	Falso	Falso	Verdadero
Quito	Esmeraldas	21	Masculino	UCE	Ingeniería Química	4-6	SARS-COV-2	De origen natural	Una entidad capaz de adaptarse y evolucionar	1 - 10	Verdadero	Verdadero	Verdadero	Verdadero	Falso	Falso	Verdadero	Verdadero	Verdadero	Verdadero	Verdadero	Verdadero	Verdadero	Verdadero	Falso	Verdadero	Verdadero	Falso	Falso	Falso	Verdadero	Falso	Falso	Verdadero
Quito	Quito	32	Femenino	UCE	Artes plásticas	7-9	SARS-COV-2	De origen natural	Una entidad capaz de adaptarse y evolucionar	No estoy seguro/a	No estoy seguro/a	Verdadero	Verdadero	Falso	No estoy seguro/a	Falso	No estoy seguro/a	Verdadero	Verdadero	Verdadero	Verdadero	Verdadero	Verdadero	Verdadero	No estoy seguro/a	No estoy seguro/a	No estoy seguro/a	Falso	No estoy seguro/a	No estoy seguro/a	Verdadero	Falso	Falso	Verdadero
Uio	Uio	31	Masculino	UCE	ING Química	4-6	SARS-COV-2	De origen natural	Una entidad capaz de adaptarse y evolucionar	31 - 40	Falso	Verdadero	Verdadero	Verdadero	Verdadero	Falso	Verdadero	Verdadero	Verdadero	Verdadero	Verdadero	Verdadero	Verdadero	Verdadero	Verdadero	Verdadero	Falso	Falso	Falso	Verdadero	Falso	Falso	Falso	Verdadero
Quito	Quito	20	Masculino	UCE	Sistemas de información	1-3	SARS-COV-2	Creado en laboratorio	Un complot mediático	31 - 40	Falso	No estoy seguro/a	No estoy seguro/a	Verdadero	Falso	No estoy seguro/a	Verdadero	Verdadero	Verdadero	Verdadero	Verdadero	Verdadero	Verdadero	Verdadero	No estoy seguro/a	No estoy seguro/a	Verdadero	Falso	No estoy seguro/a	Verdadero	No estoy seguro/a	Falso	No estoy seguro/a	Verdadero	Hay cosas que no tengo el total conocimiento pero lo que se es que saldremos de esto. Gracias.
Quito	Quito	19	Femenino	UCE	Bioquimica y Farmacia	1-3	SARS-COV-2	De origen natural	Una entidad capaz de adaptarse y evolucionar	No estoy seguro/a	Verdadero	Verdadero	Verdadero	Verdadero	Falso	Falso	Verdadero	Falso	Verdadero	Verdadero	Verdadero	Verdadero	Verdadero	Verdadero	No estoy seguro/a	No estoy seguro/a	Verdadero	Falso	Falso	No estoy seguro/a	Verdadero	Falso	Falso	Verdadero
Cayambe	Cayambe	19	Femenino	UCE	Psicología	1-3	MERS-19	Creado en laboratorio	Un complot mediático	21 - 30	Verdadero	Verdadero	Verdadero	Verdadero	Falso	Falso	Verdadero	Verdadero	Verdadero	Verdadero	Verdadero	Verdadero	Verdadero	Verdadero	Falso	Falso	Verdadero	Falso	No estoy seguro/a	Verdadero	Verdadero	Falso	Falso	Verdadero
Quito	Loja	25	Femenino	UCE	Psicología Educativa	7-9	No estoy seguro/a	No estoy seguro/a	No estoy seguro/a	1 - 10	No estoy seguro/a	Falso	Verdadero	Verdadero	Falso	Falso	Verdadero	No estoy seguro/a	Verdadero	Verdadero	Verdadero	Verdadero	Verdadero	Verdadero	Verdadero	No estoy seguro/a	No estoy seguro/a	Falso	Falso	Verdadero	Falso	Falso	Verdadero	Verdadero
Quito	Quito	25	Femenino	UCE	Artes	1-3	SARS-COV-2	Creado en laboratorio	Una entidad capaz de adaptarse y evolucionar	11 - 20	Verdadero	Verdadero	Verdadero	Verdadero	Falso	Falso	Verdadero	No estoy seguro/a	Verdadero	Verdadero	Verdadero	Verdadero	Verdadero	Verdadero	No estoy seguro/a	No estoy seguro/a	Verdadero	Falso	Falso	Falso	Verdadero	Falso	Falso	Verdadero
Quito	Quito	24	Masculino	UCE	Pedagogía de la lengua y literatura	1-3	No estoy seguro/a	De origen natural	Una entidad capaz de adaptarse y evolucionar	41 - 50	No estoy seguro/a	Verdadero	Verdadero	Verdadero	Falso	Falso	Verdadero	No estoy seguro/a	Verdadero	Verdadero	Verdadero	Verdadero	Verdadero	Verdadero	Verdadero	No estoy seguro/a	Verdadero	Falso	No estoy seguro/a	Verdadero	Verdadero	No estoy seguro/a	Falso	Verdadero	Mencionar los tipos de productos que dan vitaminas para tener más anticuerpos.
Quito	Quito	19	Femenino	UCE	Comunicación social	1-3	No estoy seguro/a	Creado en laboratorio	Una entidad capaz de adaptarse y evolucionar	51 - 100	Falso	Verdadero	No estoy seguro/a	Verdadero	Verdadero	No estoy seguro/a	No estoy seguro/a	Falso	Verdadero	Verdadero	Verdadero	Verdadero	Verdadero	Verdadero	Verdadero	No estoy seguro/a	No estoy seguro/a	Verdadero	No estoy seguro/a	No estoy seguro/a	Verdadero	Falso	Verdadero	Verdadero	Todo perfecto
Cayambe	Cayambe	20	Masculino	UCE	Ingenieria Civil	1-3	SARS-COV-2	De origen natural	Una entidad capaz de adaptarse y evolucionar	51 - 100	Verdadero	Verdadero	Verdadero	Verdadero	Falso	Falso	Verdadero	Verdadero	Verdadero	Verdadero	Verdadero	Verdadero	Falso	Verdadero	Falso	Verdadero	Verdadero	Falso	Falso	Falso	Verdadero	Falso	Verdadero	Verdadero
QUITO	QUITO	19	Femenino	UCE	LABORATORIO CLINICO	1-3	COVID-19	De origen natural	Una entidad capaz de adaptarse y evolucionar	1 - 10	Verdadero	Verdadero	Verdadero	Verdadero	Falso	Falso	Verdadero	Falso	No estoy seguro/a	Verdadero	Verdadero	Verdadero	Verdadero	Verdadero	Falso	Verdadero	Verdadero	Falso	Falso	Falso	No estoy seguro/a	Falso	Falso	Verdadero
Quito	Quito	20	Femenino	UCE	Derecho	4-6	SARS-COV-2	Creado en laboratorio	Una entidad capaz de adaptarse y evolucionar	51 - 100	Verdadero	Verdadero	Verdadero	Verdadero	Falso	Falso	No estoy seguro/a	No estoy seguro/a	Verdadero	Verdadero	Verdadero	Verdadero	Verdadero	Verdadero	No estoy seguro/a	No estoy seguro/a	Falso	Falso	No estoy seguro/a	Verdadero	No estoy seguro/a	Falso	Falso	Verdadero
Quito	Quito	23	Femenino	UCE	Ciencias Sociales	7-9	SARS-COV-2	Creado en laboratorio	Una entidad capaz de adaptarse y evolucionar	11 - 20	Verdadero	Verdadero	Falso	Verdadero	Verdadero	Falso	Verdadero	Verdadero	Verdadero	Verdadero	Verdadero	Verdadero	Verdadero	Verdadero	Verdadero	Falso	Verdadero	Falso	Falso	Verdadero	Verdadero	Falso	Falso	Verdadero
Quito	Quito	21	Femenino	UCE	Obstetricia	1-3	SARS-COV-2	De origen natural	Una entidad capaz de adaptarse y evolucionar	41 - 50	Falso	Verdadero	Verdadero	Verdadero	Falso	Falso	Verdadero	Falso	Verdadero	Verdadero	Verdadero	Verdadero	Verdadero	Verdadero	No estoy seguro/a	Verdadero	No estoy seguro/a	Verdadero	Falso	Falso	Verdadero	Falso	Falso	Verdadero
Quito	Quito	25	Femenino	UCE	Turismo ecológico	7-9	COVID-19	Creado en laboratorio	Una entidad capaz de adaptarse y evolucionar	1 - 10	No estoy seguro/a	Verdadero	Verdadero	Verdadero	Falso	No estoy seguro/a	Verdadero	Verdadero	Verdadero	Verdadero	Verdadero	Verdadero	Verdadero	Verdadero	No estoy seguro/a	Falso	Verdadero	Falso	Falso	Verdadero	Verdadero	Falso	Falso	Verdadero
QUITO	AMBATO	21	Masculino	UCE	MEDICINA	1-3	SARS-COV-2	De origen natural	Una entidad capaz de adaptarse y evolucionar	1 - 10	Verdadero	Verdadero	Verdadero	Verdadero	Falso	Falso	Verdadero	Verdadero	No estoy seguro/a	Verdadero	Verdadero	Verdadero	Verdadero	Verdadero	Verdadero	Verdadero	Verdadero	Falso	Falso	Falso	Verdadero	Falso	Falso	Verdadero
Ibarra	Ibarra	18	Masculino	UTC	Medicina Veterinaria	1-3	SARS-COV-2	De origen natural	Una entidad capaz de adaptarse y evolucionar	21 - 30	Verdadero	Verdadero	Verdadero	Verdadero	Falso	Falso	Verdadero	Falso	Verdadero	Verdadero	Verdadero	Verdadero	Verdadero	Verdadero	Verdadero	Verdadero	Verdadero	Falso	Falso	Falso	Verdadero	Falso	Falso	Verdadero
Latacunga	Latacunga	19	Femenino	UTC	Medicina Veterinaria	1-3	SARS-COV-2	Creado en laboratorio	Una entidad capaz de adaptarse y evolucionar	11 - 20	Falso	Verdadero	Verdadero	Verdadero	No estoy seguro/a	Falso	Verdadero	Falso	Verdadero	Verdadero	No estoy seguro/a	Falso	Verdadero	Verdadero	No estoy seguro/a	Verdadero	Falso	Falso	No estoy seguro/a	Verdadero	Falso	Falso	Falso	Verdadero	Se puede usar transporte público adecuadamente.
Quito	Quito	19	Masculino	UTC	Medicina Veterinaria	1-3	No estoy seguro/a	Creado en laboratorio	No estoy seguro/a	No estoy seguro/a	Falso	No estoy seguro/a	No estoy seguro/a	Verdadero	Falso	Falso	No estoy seguro/a	Falso	Verdadero	Verdadero	Verdadero	Verdadero	Verdadero	Verdadero	No estoy seguro/a	No estoy seguro/a	No estoy seguro/a	No estoy seguro/a	No estoy seguro/a	No estoy seguro/a	Falso	Falso	No estoy seguro/a	Verdadero
Quito	Quito	18	Femenino	UTC	Medicina veterinaria	1-3	SARS-COV-2	Creado en laboratorio	Un complot mediático	No estoy seguro/a	Verdadero	Verdadero	Verdadero	Verdadero	No estoy seguro/a	Falso	Verdadero	Falso	Verdadero	Verdadero	Verdadero	Verdadero	Falso	Verdadero	No estoy seguro/a	No estoy seguro/a	Verdadero	Falso	No estoy seguro/a	Verdadero	Verdadero	Falso	Falso	Verdadero
Sigchos	Quito	19	Femenino	UTC	Medicina Veterinaria	1-3	SARS-COV-2	No estoy seguro/a	Una entidad capaz de adaptarse y evolucionar	41 - 50	Verdadero	Verdadero	Verdadero	Verdadero	No estoy seguro/a	Falso	Verdadero	No estoy seguro/a	Verdadero	Verdadero	Verdadero	Verdadero	Falso	Verdadero	Falso	No estoy seguro/a	Verdadero	Falso	No estoy seguro/a	No estoy seguro/a	Verdadero	Falso	No estoy seguro/a	Verdadero
Quito	Quito	19	Femenino	UTC	Medicina Veterinaria	1-3	SARS-COV-2	Creado en laboratorio	No estoy seguro/a	31 - 40	Verdadero	Verdadero	Verdadero	Verdadero	Verdadero	Falso	Verdadero	Verdadero	Verdadero	Verdadero	Verdadero	Verdadero	Verdadero	Verdadero	No estoy seguro/a	No estoy seguro/a	Verdadero	Falso	No estoy seguro/a	Falso	Falso	Falso	Falso	Verdadero
QUITO	quito	22	Femenino	UTC	MEDICINA VETERINARIA	1-3	SARS-COV-2	Creado en laboratorio	Una entidad capaz de adaptarse y evolucionar	31 - 40	No estoy seguro/a	Verdadero	Verdadero	Verdadero	Falso	No estoy seguro/a	Verdadero	No estoy seguro/a	Verdadero	Verdadero	Verdadero	Verdadero	Verdadero	Verdadero	Falso	No estoy seguro/a	No estoy seguro/a	Verdadero	Falso	No estoy seguro/a	No estoy seguro/a	No estoy seguro/a	No estoy seguro/a	Verdadero	PUES ESTA MUY CLARO
Latacunga	Latacunga	18	Masculino	UTC	Veterinaria	1-3	SARS-COV-2	Creado en laboratorio	Un complot mediático	21 - 30	Verdadero	Verdadero	Verdadero	Verdadero	Falso	Falso	No estoy seguro/a	Verdadero	Verdadero	Verdadero	Verdadero	Verdadero	Verdadero	Verdadero	No estoy seguro/a	No estoy seguro/a	No estoy seguro/a	Falso	verdadero	Verdadero	Falso	Falso	Verdadero	Verdadero	Correcta, habla preciso sobre el conocimiento básico que debe tener una persona común frente a la Pandemia
Quito	Quito	20	Femenino	UTC	Medicina Veterinaria	1-3	No estoy seguro/a	De origen natural	Una entidad capaz de adaptarse y evolucionar	No estoy seguro/a	Verdadero	Verdadero	Verdadero	Verdadero	Falso	Falso	No estoy seguro/a	Falso	Verdadero	Verdadero	Verdadero	Verdadero	Verdadero	Verdadero	Falso	No estoy seguro/a	Verdadero	Verdadero	verdadero	No estoy seguro/a	Verdadero	Falso	Falso	Verdadero	Me parece una excelente idea esta encuesta ya que nod ayuda a saber algo mas de este virus del Covid
Latacunga	Latacunga	19	Femenino	UTC	Medicina Veterinaria	1-3	No estoy seguro/a	Creado en laboratorio	No estoy seguro/a	No estoy seguro/a	Falso	Verdadero	No estoy seguro/a	No estoy seguro/a	No estoy seguro/a	No estoy seguro/a	No estoy seguro/a	No estoy seguro/a	No estoy seguro/a	Verdadero	Verdadero	Verdadero	Verdadero	Verdadero	No estoy seguro/a	No estoy seguro/a	No estoy seguro/a	Falso	No estoy seguro/a	Verdadero	No estoy seguro/a	Falso	Verdadero	Verdadero
Napo-Tena	Santo Domingo de los Tsachilas	19	Femenino	UTC	Medicina Vterinaria	1-3	SARS-COV-2	De origen natural	Una entidad capaz de adaptarse y evolucionar	51 - 100	No estoy seguro/a	Verdadero	Verdadero	Verdadero	Verdadero	Falso	Verdadero	Falso	Verdadero	Verdadero	Verdadero	Verdadero	Verdadero	Verdadero	Falso	Falso	Verdadero	Falso	verdadero	Verdadero	Verdadero	Falso	Falso	Verdadero
Ambato	Tulcan	18	Femenino	UTC	Medicina Veterinaria	1-3	COVID-19	Creado en laboratorio	Una entidad capaz de adaptarse y evolucionar	21 - 30	Verdadero	Verdadero	Falso	Verdadero	Falso	Falso	No estoy seguro/a	Verdadero	Verdadero	Verdadero	Verdadero	Verdadero	Verdadero	Verdadero	No estoy seguro/a	Verdadero	Verdadero	Falso	No estoy seguro/a	Falso	Verdadero	Falso	Falso	Verdadero
Pillaro	Ambato	22	Femenino	UTC	Medicina Veterinaria	1-3	COVID-19	Creado en laboratorio	Una entidad capaz de adaptarse y evolucionar	51 - 100	No estoy seguro/a	Verdadero	Verdadero	Verdadero	Falso	Verdadero	Verdadero	Verdadero	Verdadero	Verdadero	Verdadero	Verdadero	Falso	Verdadero	Verdadero	Falso	Verdadero	Verdadero	verdadero	Verdadero	Verdadero	Falso	Verdadero	Verdadero
Salcedo	Salcedo	18	Femenino	UTC	Medicina Veterinaria	1-3	No estoy seguro/a	Creado en laboratorio	Una entidad capaz de adaptarse y evolucionar	41 - 50	No estoy seguro/a	Verdadero	Verdadero	Verdadero	Falso	Falso	Verdadero	Falso	Verdadero	Verdadero	Verdadero	Verdadero	No estoy seguro/a	Verdadero	Verdadero	No estoy seguro/a	Verdadero	Falso	Falso	No estoy seguro/a	Falso	Falso	Falso	Verdadero
Quito	Quito	20	Masculino	UTC	Veterinaria	1-3	SARS-COV-2	Creado en laboratorio	Una entidad capaz de adaptarse y evolucionar	1 - 10	Falso	Verdadero	No estoy seguro/a	Verdadero	Falso	Falso	Verdadero	Verdadero	Verdadero	Verdadero	Verdadero	Verdadero	Verdadero	Verdadero	Verdadero	Verdadero	Verdadero	Falso	No estoy seguro/a	Falso	Verdadero	Falso	Falso	Verdadero
Pujilí	Pujilí	18	Femenino	UTC	Medicina Veterinaria	1-3	SARS-COV-2	De origen natural	Una entidad capaz de adaptarse y evolucionar	31 - 40	Verdadero	Verdadero	Verdadero	Verdadero	Falso	Falso	Verdadero	Verdadero	Verdadero	Verdadero	Verdadero	Verdadero	Verdadero	Verdadero	No estoy seguro/a	Falso	Falso	Falso	Falso	Falso	Verdadero	Falso	Falso	Verdadero
Pujili	Latacunga	24	Masculino	UTC	Medicina veterinaria	1-3	SARS-COV-2	Creado en laboratorio	Una entidad capaz de adaptarse y evolucionar	21 - 30	Verdadero	Verdadero	Verdadero	Verdadero	Falso	Falso	Verdadero	Verdadero	Verdadero	Verdadero	Verdadero	Verdadero	Verdadero	Verdadero	Falso	Verdadero	Verdadero	Verdadero	Falso	Verdadero	Verdadero	Falso	Verdadero	Verdadero	Para frenar el contagio del covid 19 es tomar muy enserio las medidas de seguridad para no infectarse,
Pujili	Latacunga	18	Femenino	UTC	Veterinaria	1-3	No estoy seguro/a	Creado en laboratorio	No estoy seguro/a	No estoy seguro/a	No estoy seguro/a	Verdadero	Verdadero	Verdadero	Falso	Falso	Verdadero	Falso	Verdadero	Verdadero	Verdadero	Verdadero	Verdadero	Verdadero	Verdadero	No estoy seguro/a	Verdadero	Verdadero	Falso	Verdadero	Verdadero	Falso	Verdadero	Verdadero	En mi punto de vista debemos ser mucho mas responsables por lo que esta pasado a nivel mundial y no automedicarse sin antes consultarlo con un medico especialista
Latacunga	Salcedo	18	Masculino	UTC	Medicina Veterinaria	1-3	SARS-COV-2	Creado en laboratorio	Una entidad capaz de adaptarse y evolucionar	51 - 100	Verdadero	Verdadero	No estoy seguro/a	Verdadero	No estoy seguro/a	Falso	Verdadero	No estoy seguro/a	Verdadero	Verdadero	Verdadero	Verdadero	Verdadero	Verdadero	No estoy seguro/a	No estoy seguro/a	No estoy seguro/a	No estoy seguro/a	No estoy seguro/a	Verdadero	No estoy seguro/a	Falso	No estoy seguro/a	Verdadero	el gobierno no debió cambiar a semaforos las provincias y tomar medidas de una vuelta a la normalidad en la actualidad esta llegando al pico de contagios en la sierra debería agudizar las indicaciones en cada semaforo
Quito	Quito	19	Femenino	UTC	medicina veterinaria	1-3	SARS-COV-2	Creado en laboratorio	Un complot mediático	11 - 20	Verdadero	Verdadero	Verdadero	Verdadero	Falso	Falso	Verdadero	Falso	Verdadero	Verdadero	Verdadero	Verdadero	Verdadero	Verdadero	Verdadero	Verdadero	Verdadero	Verdadero	Falso	Falso	Verdadero	Falso	Falso	Verdadero	Segun lo que he hemos investigado en la universidad UTC los quimicos que contengan cloro no son factibles para el ser humano y tampoco deben ser consumidos por este ya que se ha escuchado casos que este se usa para prevenir el covid,lo cual es falso.
Salcedo	Salcedo	21	Femenino	UTC	Medicina Veterinaria	1-3	No estoy seguro/a	No estoy seguro/a	No estoy seguro/a	No estoy seguro/a	Falso	Verdadero	Verdadero	Verdadero	Falso	Falso	Verdadero	Falso	Falso	Verdadero	Verdadero	Verdadero	Verdadero	Verdadero	Verdadero	No estoy seguro/a	Verdadero	Verdadero	No estoy seguro/a	Verdadero	Falso	Falso	No estoy seguro/a	Verdadero	La encuesta es muy útil para nosotros como estudiantes ya que no conocemos muchas cosas respecto a este virus que nos a rodeado esta encuesta también nos ayuda a tener un poco mas de curiosidad incluso para investigar y informarnos de lo que esta pasando en el mundo y como podríamos protegernos para no ser contagiados y así mismo para proteger de nuestra familia.
QUITO	QUITO	19	Femenino	UTC	Veterinaria y zootecnia	1-3	COVID-19	Creado en laboratorio	No estoy seguro/a	21 - 30	Falso	Verdadero	Verdadero	Verdadero	Falso	Falso	Verdadero	Verdadero	Verdadero	Verdadero	Verdadero	Verdadero	Verdadero	Verdadero	Verdadero	Verdadero	No estoy seguro/a	Verdadero	No estoy seguro/a	Verdadero	Falso	Falso	Falso	Verdadero	Me parece una buena idea realizar esta encuesta para saber que tanto estamos informados acerca de deste virus
MACHACHI	MACHACHI	20	Femenino	UTC	VETERINARIA	1-3	COVID-19	De origen natural	Una entidad capaz de adaptarse y evolucionar	11 - 20	No estoy seguro/a	Verdadero	Verdadero	Verdadero	Falso	Falso	Verdadero	Falso	Verdadero	Verdadero	Verdadero	Verdadero	Verdadero	Verdadero	Falso	No estoy seguro/a	Verdadero	Falso	Falso	No estoy seguro/a	Verdadero	Falso	Falso	Verdadero
Latacunga	Latacunga	22	Masculino	UTC	Medicina veterinaria	1-3	SARS-COV-2	Creado en laboratorio	Una entidad capaz de adaptarse y evolucionar	1 - 10	Verdadero	Verdadero	Verdadero	Verdadero	Falso	Falso	Verdadero	Falso	Verdadero	Verdadero	Verdadero	Verdadero	Verdadero	Verdadero	No estoy seguro/a	Falso	Verdadero	Falso	verdadero	Verdadero	Verdadero	Falso	Falso	Verdadero
Machachi	Quito	19	Femenino	UTC	Medicina Veterinaria	1-3	SARS-COV-2	No estoy seguro/a	No estoy seguro/a	21 - 30	Verdadero	Verdadero	Verdadero	Verdadero	Falso	Falso	Verdadero	Falso	Verdadero	Verdadero	Verdadero	Verdadero	Verdadero	Verdadero	Verdadero	Verdadero	Falso	Verdadero	Falso	No estoy seguro/a	Verdadero	Falso	Falso	Verdadero
Saquisili	Cotopaxi	20	Masculino	UTC	Medicina veterinaria	1-3	COVID-19	Creado en laboratorio	No estoy seguro/a	No estoy seguro/a	Verdadero	Verdadero	Verdadero	Verdadero	Falso	Falso	Verdadero	Verdadero	Verdadero	Verdadero	Verdadero	Verdadero	Verdadero	Verdadero	Falso	No estoy seguro/a	No estoy seguro/a	No estoy seguro/a	No estoy seguro/a	Verdadero	Falso	Falso	No estoy seguro/a	Verdadero	Mi opinión es que lo tomemos con responsabilizad las cosas si salimos a las calles. y ponernos en las manos de Dios
Quito	Quito	19	Femenino	UTC	Medicina Veterinaria.	1-3	SARS-COV-2	De origen natural	Una entidad capaz de adaptarse y evolucionar	No estoy seguro/a	No estoy seguro/a	Verdadero	No estoy seguro/a	Verdadero	Falso	Falso	Verdadero	Falso	Verdadero	Verdadero	Verdadero	Verdadero	Verdadero	Verdadero	Verdadero	Verdadero	Verdadero	Falso	Falso	No estoy seguro/a	Falso	Falso	No estoy seguro/a	Verdadero	Son muy buenas preguntas ya que son precisas y preguntan solo lo necesario y básico que se debería saber sobre un tema tan importante como es el conocimiento sobre el Covid 19 en la actualidad.
Puyo	Puyo	18	Masculino	UTC	Medicina Veterinaria	1-3	SARS-COV-2	No estoy seguro/a	Una entidad capaz de adaptarse y evolucionar	No estoy seguro/a	Falso	Verdadero	No estoy seguro/a	Verdadero	Falso	Falso	Verdadero	No estoy seguro/a	Verdadero	Verdadero	Verdadero	Verdadero	No estoy seguro/a	Verdadero	No estoy seguro/a	No estoy seguro/a	Verdadero	Falso	Falso	No estoy seguro/a	Verdadero	Falso	Falso	Verdadero
Machachi	Machachi	24	Masculino	UTC	Medicina Veterinaria	1-3	SARS-COV-2	De origen natural	Una entidad capaz de adaptarse y evolucionar	21 - 30	No estoy seguro/a	Verdadero	Verdadero	Verdadero	Falso	Falso	Verdadero	No estoy seguro/a	Verdadero	Verdadero	Verdadero	Verdadero	Verdadero	Verdadero	Falso	Verdadero	Verdadero	Verdadero	verdadero	Verdadero	Verdadero	Falso	No estoy seguro/a	Verdadero
Quito	Quito	19	Femenino	UCE	Odontología	1-3	SARS-COV-2	Creado en laboratorio	Una entidad capaz de adaptarse y evolucionar	1 - 10	Falso	Verdadero	Verdadero	Verdadero	Falso	Verdadero	Verdadero	Falso	Verdadero	Verdadero	Verdadero	Verdadero	Verdadero	Verdadero	Falso	Verdadero	Verdadero	Falso	Falso	Falso	Verdadero	Falso	Falso	Verdadero
Puyo	Puyo	18	Femenino	UTC	Medicina Veterinaria	1-3	No estoy seguro/a	Creado en laboratorio	Una entidad capaz de adaptarse y evolucionar	31 - 40	Falso	Verdadero	Verdadero	Verdadero	Falso	Falso	Verdadero	Verdadero	Verdadero	Verdadero	Verdadero	Verdadero	Verdadero	No estoy seguro/a	Falso	Verdadero	Verdadero	Falso	No estoy seguro/a	Verdadero	Verdadero	Falso	Falso	Verdadero
tena	Tena	19	Femenino	UTC	medicina veterinaria	1-3	No estoy seguro/a	De origen natural	Una entidad capaz de adaptarse y evolucionar	51 - 100	No estoy seguro/a	Verdadero	Verdadero	Verdadero	Falso	Falso	Verdadero	No estoy seguro/a	Verdadero	Verdadero	Verdadero	Verdadero	Verdadero	Verdadero	No estoy seguro/a	No estoy seguro/a	No estoy seguro/a	No estoy seguro/a	No estoy seguro/a	Verdadero	Falso	No estoy seguro/a	Falso	Verdadero
Quito	Quito	19	Femenino	UCE	Contabilidad y Auditoria	1-3	SARS-COV-2	De origen natural	No estoy seguro/a	No estoy seguro/a	No estoy seguro/a	Verdadero	Verdadero	Verdadero	Falso	Falso	Verdadero	No estoy seguro/a	Verdadero	Verdadero	Verdadero	Verdadero	Verdadero	Verdadero	No estoy seguro/a	No estoy seguro/a	Verdadero	Falso	Falso	Verdadero	No estoy seguro/a	Falso	Falso	Verdadero	Me parece bastante importante informarnos con datos comprobados para evitar tensiones y dar mal información.
San Gabriel	San Gabriel	18	Femenino	UTC	Veterinaria	1-3	No estoy seguro/a	Creado en laboratorio	Un compuesto químico	31 - 40	No estoy seguro/a	Verdadero	Verdadero	Verdadero	Falso	Falso	Verdadero	Verdadero	Verdadero	Verdadero	Verdadero	Verdadero	Verdadero	Verdadero	Verdadero	No estoy seguro/a	No estoy seguro/a	Falso	verdadero	Verdadero	Falso	Falso	Verdadero	Verdadero
Lago Agrio	Lago Agrio	18	Femenino	UTC	Veterinaria	7-9	SARS-COV-2	Creado en laboratorio	No estoy seguro/a	31 - 40	Verdadero	Verdadero	Verdadero	Verdadero	Falso	Falso	Verdadero	Falso	Verdadero	Verdadero	Verdadero	Verdadero	Verdadero	Verdadero	Falso	No estoy seguro/a	Verdadero	Falso	No estoy seguro/a	Falso	Verdadero	Falso	Falso	Verdadero
LATACUNGA	LATACUNGA	25	Femenino	UTC	MEDICINA VETERINARIA	1-3	SARS-COV-2	No estoy seguro/a	Una entidad capaz de adaptarse y evolucionar	No estoy seguro/a	Falso	Verdadero	Verdadero	Verdadero	No estoy seguro/a	Falso	Verdadero	Falso	Verdadero	Verdadero	Verdadero	Verdadero	Verdadero	Verdadero	No estoy seguro/a	No estoy seguro/a	Verdadero	Verdadero	No estoy seguro/a	Verdadero	No estoy seguro/a	Falso	Falso	Verdadero
Aldea Modelo	Pujili	18	Femenino	UTC	Medicina veterinaria	1-3	No estoy seguro/a	Creado en laboratorio	Una entidad capaz de adaptarse y evolucionar	No estoy seguro/a	Verdadero	Verdadero	No estoy seguro/a	Verdadero	Falso	No estoy seguro/a	No estoy seguro/a	Falso	Verdadero	Verdadero	Verdadero	Verdadero	Verdadero	Verdadero	No estoy seguro/a	Verdadero	No estoy seguro/a	Verdadero	verdadero	Verdadero	Falso	Falso	Verdadero	Verdadero
Orellana	Orellana	29	Masculino	UCE	Bioquímica Clínica	4-6	SARS-COV-2	De origen natural	Una entidad capaz de adaptarse y evolucionar	No estoy seguro/a	Verdadero	Verdadero	Verdadero	Verdadero	Falso	Falso	Verdadero	No estoy seguro/a	Verdadero	Verdadero	Verdadero	Verdadero	Verdadero	Verdadero	Falso	Verdadero	Verdadero	Falso	Falso	Verdadero	Verdadero	verdadero	Falso	Verdadero
MACHACHI	MACHACHI	21	Femenino	UTC	MEDICINA VETERINARIA	1-3	COVID-19	Creado en laboratorio	Una entidad capaz de adaptarse y evolucionar	51 - 100	Verdadero	Verdadero	Verdadero	Verdadero	Falso	Falso	Falso	Verdadero	Verdadero	Verdadero	Verdadero	No estoy seguro/a	Falso	Verdadero	Falso	Verdadero	Verdadero	Falso	Falso	Verdadero	Falso	Falso	Falso	Verdadero	Considero que este tipo de encuestas debería realizarse con toda la población del Ecuador ya que asi podriamos saber que tanto esta informada la ciudadanía y si fuera un caso en que no hay un buen porcentaje de personas que conozcan del casi, el ministerio de salud podría realizar mas charlas sobre este tema que es muy importante para salvaguardar nuestras vidas.
Quito	Otavalo	20	Masculino	UCE	Derecho	1-3	SARS-COV-2	Creado en laboratorio	Una entidad capaz de adaptarse y evolucionar	1 - 10	Verdadero	Verdadero	Verdadero	Verdadero	Falso	Falso	Verdadero	Falso	Verdadero	No estoy seguro/a	Verdadero	Verdadero	No estoy seguro/a	Verdadero	No estoy seguro/a	Verdadero	Verdadero	Falso	Falso	Verdadero	Verdadero	Falso	Falso	Verdadero	Me parece genial esta iniciativa, de esta manera se logrará identificar el nivel de conocimiento que poseemos en las distintas instituciones superiores. Sin embargo, en una de las preguntas no me permitió poner "verdadero", conforme a lo que sabía. Espero se solucione ese aspecto técnico. Sin más que decir me despido. Gracias.
Puyo	Puyo	18	Femenino	UTC	Medicina Veterinaria	1-3	SARS-COV-2	Creado en laboratorio	Un complot mediático	41 - 50	Verdadero	Verdadero	Verdadero	Verdadero	Falso	Falso	Verdadero	No estoy seguro/a	Verdadero	Verdadero	Verdadero	Verdadero	Verdadero	Verdadero	Falso	No estoy seguro/a	Verdadero	Falso	Falso	No estoy seguro/a	Verdadero	Falso	Falso	Verdadero
Machachi	Quito	21	Masculino	UTC	Medicina veterinaria	1-3	SARS-COV-2	De origen natural	Una entidad capaz de adaptarse y evolucionar	1 - 10	Verdadero	Verdadero	Verdadero	Verdadero	Verdadero	Falso	Verdadero	Verdadero	Verdadero	Verdadero	Verdadero	Verdadero	Verdadero	Verdadero	Falso	Verdadero	Verdadero	Falso	Falso	Verdadero	Falso	Falso	Falso	Verdadero	El uso de nanopartículas magnéticas puede ayudar a reducir costos de pruebas y su eficiencia es buena, pero no séen que grado puede ser mejor una prueba de PCR
Ambato	Pelileo	20	Femenino	UTC	Medicina veterinaria	1-3	COVID-19	No estoy seguro/a	Una entidad capaz de adaptarse y evolucionar	No estoy seguro/a	Verdadero	Verdadero	Verdadero	Verdadero	Falso	Falso	Verdadero	Verdadero	Verdadero	Verdadero	Verdadero	Verdadero	Verdadero	Verdadero	No estoy seguro/a	Verdadero	Verdadero	Falso	Falso	Verdadero	Verdadero	Falso	Falso	Verdadero	es importante que las personas sepan cuidarse, y tener todas la medidas de protección
Quito	Quito	22	Masculino	UCE	Medicina Veterinaria	7-9	SARS-COV-2	No estoy seguro/a	Una entidad capaz de adaptarse y evolucionar	1 - 10	Verdadero	Verdadero	Verdadero	Verdadero	No estoy seguro/a	Falso	Verdadero	Falso	Verdadero	Verdadero	Verdadero	Verdadero	Verdadero	Verdadero	Falso	Verdadero	Verdadero	Falso	Falso	No estoy seguro/a	Verdadero	Falso	Falso	Verdadero	La pregunta de comer o tocar animales no se aprecia si tiene relación con la convivencia de animales salvajes, es decir, animales exóticos enfermos confinados en mercados que son utilizados para el consumo.
Quito	Quito	24	Femenino	UCE	Turismo Histórico Cultural	7-9	SARS-COV-2	Creado en laboratorio	Una entidad capaz de adaptarse y evolucionar	No estoy seguro/a	No estoy seguro/a	Verdadero	Verdadero	Verdadero	Falso	Falso	Verdadero	No estoy seguro/a	Verdadero	Verdadero	Verdadero	Verdadero	Verdadero	Verdadero	No estoy seguro/a	No estoy seguro/a	Verdadero	Falso	No estoy seguro/a	No estoy seguro/a	Verdadero	Falso	Falso	Verdadero
Quito	Quito	19	Masculino	UCE	Química	1-3	SARS-COV-2	De origen natural	Una entidad capaz de adaptarse y evolucionar	1 - 10	Verdadero	Verdadero	Verdadero	Verdadero	No estoy seguro/a	Falso	Verdadero	Verdadero	Verdadero	Verdadero	Verdadero	Verdadero	Verdadero	Verdadero	Falso	No estoy seguro/a	Verdadero	Falso	Falso	No estoy seguro/a	Verdadero	Falso	Falso	Verdadero
Quito	Quito	39	Masculino	UCE	Derecho	4-6	SARS-COV-2	De origen natural	Una entidad capaz de adaptarse y evolucionar	1 - 10	Verdadero	Verdadero	Verdadero	Verdadero	Falso	Falso	Verdadero	Falso	Verdadero	Verdadero	Verdadero	Verdadero	Verdadero	Verdadero	Falso	Verdadero	Verdadero	Falso	Falso	Falso	Falso	Falso	Falso	Verdadero
Quito	Quito	20	Masculino	UCE	Finanzas	1-3	COVID-19	Creado en laboratorio	No estoy seguro/a	1 - 10	No estoy seguro/a	No estoy seguro/a	No estoy seguro/a	Verdadero	Falso	Falso	Verdadero	No estoy seguro/a	Verdadero	Verdadero	Verdadero	Verdadero	Verdadero	Verdadero	No estoy seguro/a	No estoy seguro/a	Verdadero	Falso	Falso	Falso	No estoy seguro/a	Falso	Falso	No estoy seguro/a
El Chaco	Quito	20	Masculino	UCE	Ing. Civil	1-3	SARS-COV-2	No estoy seguro/a	Una entidad capaz de adaptarse y evolucionar	1 - 10	Verdadero	Verdadero	Verdadero	Verdadero	Falso	Falso	Verdadero	Falso	Verdadero	Verdadero	Verdadero	Verdadero	Verdadero	Verdadero	Falso	No estoy seguro/a	No estoy seguro/a	Falso	No estoy seguro/a	No estoy seguro/a	Falso	Falso	Falso	Verdadero
Quito	Loja	27	Femenino	UCE	Enfermeria	4-6	SARS-COV-2	De origen natural	Una entidad capaz de adaptarse y evolucionar	1 - 10	Verdadero	Verdadero	Verdadero	Verdadero	Falso	Falso	Verdadero	Verdadero	Verdadero	Verdadero	Verdadero	Verdadero	Verdadero	Verdadero	Verdadero	Verdadero	Verdadero	Falso	Falso	No estoy seguro/a	Verdadero	Falso	Falso	Verdadero
Ibarra	Ibarra	19	Femenino	UCE	Bioquimica y farmacia	1-3	SARS-COV-2	Creado en laboratorio	No estoy seguro/a	11 - 20	Verdadero	Verdadero	Verdadero	Verdadero	Falso	Falso	Falso	Falso	Verdadero	Verdadero	Verdadero	Verdadero	Verdadero	Verdadero	Falso	No estoy seguro/a	Falso	Falso	Falso	No estoy seguro/a	Verdadero	Falso	Falso	Verdadero
Quito	Quito	24	Femenino	UCE	Turismo Ecológico	7-9	No estoy seguro/a	Creado en laboratorio	No estoy seguro/a	21 - 30	Falso	Verdadero	Verdadero	Verdadero	Falso	Falso	Verdadero	Verdadero	Verdadero	Verdadero	Verdadero	Verdadero	Verdadero	Verdadero	Verdadero	No estoy seguro/a	Verdadero	Falso	Falso	Falso	Falso	Falso	Falso	Verdadero	Considero que la encuesta, tal ves se puede ampliar a lo que se ha generado a causa del COVID_19 (despidos, muertes por despido, depresión, separación familiar), ya que la gente en el Ecuador no solo muere por COVID-19 si no por otras causas.
Quito	Zaruma	25	Femenino	UCE	Ingeniería Ambiental	7-9	SARS-COV-2	No estoy seguro/a	Una entidad capaz de adaptarse y evolucionar	No estoy seguro/a	Verdadero	Verdadero	Verdadero	Verdadero	Falso	Falso	Verdadero	No estoy seguro/a	No estoy seguro/a	Verdadero	Verdadero	Verdadero	Verdadero	Verdadero	Falso	No estoy seguro/a	No estoy seguro/a	Falso	Falso	No estoy seguro/a	Verdadero	Falso	Falso	Verdadero
Quito	Quito	24	Masculino	UCE	Medicina Veterinaria y Zootecnia	7-9	SARS-COV-2	De origen natural	Una entidad capaz de adaptarse y evolucionar	1 - 10	Verdadero	Verdadero	Verdadero	Verdadero	Falso	Falso	Verdadero	Falso	Verdadero	Verdadero	Verdadero	Verdadero	Verdadero	Verdadero	Falso	Verdadero	Verdadero	Falso	Falso	Falso	Verdadero	Falso	Falso	Verdadero
Manabí	Quito	19	Femenino	UCE	Artes Plásticas	1-3	SARS-COV-2	No estoy seguro/a	Una entidad capaz de adaptarse y evolucionar	21 - 30	Verdadero	Verdadero	Verdadero	Verdadero	Falso	Falso	Verdadero	Falso	Verdadero	Verdadero	Verdadero	Verdadero	Verdadero	Verdadero	No estoy seguro/a	No estoy seguro/a	Verdadero	No estoy seguro/a	No estoy seguro/a	Verdadero	Verdadero	Falso	Falso	Verdadero
Quito	Quito	24	Masculino	UCE	Estadista	7-9	SARS-COV-2	De origen natural	No estoy seguro/a	1 - 10	No estoy seguro/a	No estoy seguro/a	Verdadero	Falso	Falso	Falso	Verdadero	Falso	Falso	Verdadero	Verdadero	Verdadero	Verdadero	Verdadero	No estoy seguro/a	No estoy seguro/a	No estoy seguro/a	Falso	Falso	No estoy seguro/a	Verdadero	Falso	Falso	Verdadero
Quito	Quito	21	Femenino	UCE	Trabajo Social	7-9	SARS-COV-2	Creado en laboratorio	Una entidad capaz de adaptarse y evolucionar	1 - 10	Falso	Verdadero	Verdadero	Verdadero	Falso	Falso	Verdadero	Falso	Verdadero	Verdadero	Verdadero	Verdadero	Verdadero	Verdadero	Falso	Verdadero	Falso	Falso	Falso	Verdadero	Falso	Falso	Falso	Verdadero	Muy interesante su investigación.
Quito	Quito	25	Femenino	UCE	Contabilidad y Auditoria	7-9	SARS-COV-2	Creado en laboratorio	Una entidad capaz de adaptarse y evolucionar	21 - 30	Verdadero	Verdadero	Verdadero	Verdadero	Falso	Falso	Verdadero	Falso	Verdadero	Verdadero	Verdadero	Verdadero	Verdadero	Verdadero	No estoy seguro/a	No estoy seguro/a	Verdadero	Falso	Falso	Falso	Verdadero	Falso	Falso	Verdadero
Latacunga	Quito	18	Femenino	UTC	Medicina Veterinaria	1-3	COVID-19	Creado en laboratorio	Un complot mediático	51 - 100	Verdadero	Verdadero	Verdadero	Verdadero	Falso	Falso	Verdadero	No estoy seguro/a	Verdadero	Verdadero	Verdadero	Verdadero	Verdadero	Verdadero	Falso	Falso	Verdadero	Falso	Falso	Verdadero	Falso	Falso	No estoy seguro/a	Verdadero
Sangolquí	Sangolquí	18	Masculino	UTC	Medicina Veterinaria	1-3	SARS-COV-2	Creado en laboratorio	Una entidad capaz de adaptarse y evolucionar	No estoy seguro/a	Verdadero	Verdadero	Verdadero	Verdadero	Falso	Falso	Verdadero	Verdadero	Verdadero	Verdadero	Verdadero	Verdadero	Verdadero	Verdadero	No estoy seguro/a	No estoy seguro/a	Verdadero	Falso	Falso	Verdadero	No estoy seguro/a	Falso	Verdadero	Verdadero
Santo Domingo	Santo Domingo	18	Femenino	UTC	Medicina Veterinaria	1-3	SARS-COV-2	Creado en laboratorio	Un complot mediático	1 - 10	No estoy seguro/a	No estoy seguro/a	No estoy seguro/a	Verdadero	Falso	Falso	Verdadero	Falso	Verdadero	Verdadero	Verdadero	Verdadero	Verdadero	Verdadero	No estoy seguro/a	No estoy seguro/a	Verdadero	Falso	Falso	No estoy seguro/a	Verdadero	Falso	No estoy seguro/a	Verdadero
Pucayacu	La Maná - pucayacu	17	Masculino	UTC	Medicina veterinaria	1-3	No estoy seguro/a	De origen natural	Una entidad capaz de adaptarse y evolucionar	11 - 20	Verdadero	Verdadero	Verdadero	Verdadero	Falso	Falso	Verdadero	Falso	Verdadero	Verdadero	Verdadero	Verdadero	Verdadero	Verdadero	Verdadero	Falso	Verdadero	Falso	verdadero	Verdadero	Verdadero	Falso	Falso	Verdadero
Latacunga	Quito	18	Femenino	UTC	Medicina Veterinaria	1-3	No estoy seguro/a	Creado en laboratorio	Un compuesto químico	1 - 10	Falso	Verdadero	Verdadero	Verdadero	Falso	Verdadero	Verdadero	Verdadero	Verdadero	Verdadero	Verdadero	Verdadero	Verdadero	Verdadero	Verdadero	Falso	Verdadero	Verdadero	Falso	Verdadero	Falso	Falso	Falso	Verdadero
Ambato	Ambato	19	Femenino	UTC	Medicina Veterinaria	1-3	SARS-COV-2	Creado en laboratorio	Una entidad capaz de adaptarse y evolucionar	No estoy seguro/a	No estoy seguro/a	Verdadero	Verdadero	Verdadero	Falso	Falso	No estoy seguro/a	Falso	Verdadero	Verdadero	Verdadero	Verdadero	Verdadero	Verdadero	No estoy seguro/a	No estoy seguro/a	Verdadero	Falso	Falso	Falso	Falso	Falso	Falso	Verdadero
Sangolqui	Sangolqui	18	Masculino	UTC	Medicina Veterinaria	1-3	SARS-COV-2	De origen natural	Una entidad capaz de adaptarse y evolucionar	31 - 40	No estoy seguro/a	Verdadero	No estoy seguro/a	Verdadero	Falso	Falso	Verdadero	Falso	Verdadero	Verdadero	Verdadero	Verdadero	Verdadero	Verdadero	No estoy seguro/a	No estoy seguro/a	Verdadero	Falso	No estoy seguro/a	No estoy seguro/a	No estoy seguro/a	Falso	Falso	Verdadero	Es un buen método para saber el conocimiento de los demas
Otavalo	Otavalo	21	Masculino	UTC	Veterinaria	1-3	SARS-COV-2	De origen natural	Una entidad capaz de adaptarse y evolucionar	11 - 20	Falso	Verdadero	Verdadero	Falso	Falso	Falso	Verdadero	Verdadero	Verdadero	Verdadero	Verdadero	Verdadero	Verdadero	Verdadero	Verdadero	Verdadero	Verdadero	Falso	Falso	Falso	Verdadero	verdadero	Falso	Verdadero	.
Latacunga	Latacunga	18	Femenino	UTC	Medicina Veterinaria	1-3	SARS-COV-2	De origen natural	Una entidad capaz de adaptarse y evolucionar	No estoy seguro/a	No estoy seguro/a	No estoy seguro/a	No estoy seguro/a	Verdadero	Falso	Falso	Verdadero	Verdadero	Verdadero	Verdadero	Verdadero	Verdadero	Verdadero	Verdadero	No estoy seguro/a	No estoy seguro/a	Verdadero	Falso	No estoy seguro/a	Verdadero	Verdadero	Falso	Falso	Verdadero
Latacunga	Latacunga	20	Masculino	UTC	Medicina Veterinaria	1-3	SARS-COV-2	De origen natural	Una entidad capaz de adaptarse y evolucionar	1 - 10	Verdadero	Verdadero	Verdadero	Verdadero	Verdadero	Falso	Verdadero	Falso	Verdadero	Verdadero	Verdadero	Verdadero	Verdadero	Verdadero	No estoy seguro/a	Falso	Verdadero	Falso	Falso	Falso	Verdadero	Falso	Falso	Verdadero
Latacunga	Latacunga	20	Femenino	UTC	Medicina Veterinaria	1-3	SARS-COV-2	Creado en laboratorio	Una entidad capaz de adaptarse y evolucionar	41 - 50	Falso	Verdadero	Verdadero	Verdadero	Falso	Falso	Verdadero	Verdadero	Verdadero	Verdadero	Verdadero	Verdadero	Verdadero	Verdadero	Falso	Verdadero	Verdadero	Falso	Falso	Falso	Verdadero	Falso	Verdadero	Verdadero
Santo Domingo	Santo Domingo	17	Femenino	UTC	Medica veterinaria	1-3	COVID-19	De origen natural	Una entidad capaz de adaptarse y evolucionar	51 - 100	Verdadero	Verdadero	No estoy seguro/a	Verdadero	Falso	Verdadero	Verdadero	No estoy seguro/a	Verdadero	Verdadero	Verdadero	Verdadero	Verdadero	No estoy seguro/a	Falso	No estoy seguro/a	Verdadero	No estoy seguro/a	No estoy seguro/a	Verdadero	Falso	Falso	Verdadero	Verdadero
Quito	Quito	19	Masculino	UCE	Veterinaria	1-3	SARS-COV-2	De origen natural	Una entidad capaz de adaptarse y evolucionar	51 - 100	No estoy seguro/a	Verdadero	Verdadero	Verdadero	Falso	Falso	Verdadero	Verdadero	Verdadero	Verdadero	Verdadero	Verdadero	Verdadero	Verdadero	Falso	No estoy seguro/a	Verdadero	No estoy seguro/a	verdadero	Falso	No estoy seguro/a	Falso	Falso	Verdadero
Quito	Quito	18	Femenino	UTC	Medicina Veterinaria	1-3	SARS-COV-2	De origen natural	Una entidad capaz de adaptarse y evolucionar	21 - 30	No estoy seguro/a	Verdadero	Verdadero	Verdadero	No estoy seguro/a	Falso	Verdadero	Falso	Verdadero	Verdadero	Verdadero	Verdadero	Verdadero	Verdadero	Falso	Verdadero	Verdadero	Falso	Falso	Falso	No estoy seguro/a	No estoy seguro/a	Verdadero	Verdadero
Latacunga	Latacunga	19	Femenino	UTC	Medicina Veterinaria	1-3	SARS-COV-2	Creado en laboratorio	Un compuesto químico	41 - 50	No estoy seguro/a	Verdadero	No estoy seguro/a	Verdadero	Falso	Falso	Verdadero	Falso	Verdadero	Verdadero	Verdadero	Verdadero	Verdadero	No estoy seguro/a	Verdadero	Verdadero	Verdadero	No estoy seguro/a	No estoy seguro/a	Verdadero	No estoy seguro/a	No estoy seguro/a	Falso	No estoy seguro/a
Latacunga	Latacunga	20	Femenino	UTC	Veterinaria	1-3	No estoy seguro/a	Creado en laboratorio	No estoy seguro/a	No estoy seguro/a	Verdadero	Verdadero	No estoy seguro/a	Verdadero	No estoy seguro/a	Falso	No estoy seguro/a	Falso	Verdadero	Verdadero	Verdadero	Verdadero	Verdadero	Verdadero	No estoy seguro/a	Verdadero	Verdadero	Verdadero	No estoy seguro/a	Verdadero	Verdadero	Falso	Falso	Verdadero
Santo Domingo de los Tsachilas	Santo Domingo	18	Femenino	UTC	Medicina Veterinaria	1-3	COVID-19	Creado en laboratorio	Una entidad capaz de adaptarse y evolucionar	41 - 50	No estoy seguro/a	No estoy seguro/a	Falso	Verdadero	Falso	Falso	Verdadero	Falso	Verdadero	Verdadero	Verdadero	Verdadero	Verdadero	Verdadero	Falso	No estoy seguro/a	Verdadero	Falso	Falso	Falso	No estoy seguro/a	Falso	Falso	Verdadero
Quito	Quito	27	Masculino	UTC	Veterinaria	4-6	SARS-COV-2	Creado en laboratorio	Una entidad capaz de adaptarse y evolucionar	11 - 20	No estoy seguro/a	Verdadero	Verdadero	Verdadero	Falso	Falso	Verdadero	Verdadero	Verdadero	Verdadero	Verdadero	Verdadero	Verdadero	No estoy seguro/a	Falso	No estoy seguro/a	Verdadero	Falso	No estoy seguro/a	No estoy seguro/a	Falso	Falso	Falso	Verdadero
Quito	Quito	23	Femenino	UCE	Química de alimentos	4-6	SARS-COV-2	De origen natural	Una entidad capaz de adaptarse y evolucionar	No estoy seguro/a	Verdadero	Verdadero	Verdadero	Verdadero	Falso	Falso	Verdadero	Verdadero	Verdadero	Verdadero	Verdadero	Verdadero	Verdadero	Verdadero	Verdadero	Verdadero	Verdadero	Falso	Falso	Verdadero	Verdadero	Falso	Falso	Verdadero
QUITO	QUITO	35	Masculino	UCE	ADMINISTRACIÓN DE EMPRESAS	9 en adelante	COVID-19	Creado en laboratorio	Una entidad capaz de adaptarse y evolucionar	1 - 10	No estoy seguro/a	Verdadero	Verdadero	No estoy seguro/a	No estoy seguro/a	Falso	Verdadero	No estoy seguro/a	Verdadero	Verdadero	Verdadero	Verdadero	Verdadero	Verdadero	No estoy seguro/a	No estoy seguro/a	Verdadero	Falso	No estoy seguro/a	No estoy seguro/a	Verdadero	verdadero	Falso	Verdadero
Quito	Quito	24	Masculino	UCE	Computación	1-3	SARS-COV-2	No estoy seguro/a	Una entidad capaz de adaptarse y evolucionar	No estoy seguro/a	Verdadero	Verdadero	Verdadero	Verdadero	Falso	Falso	Verdadero	No estoy seguro/a	Verdadero	Verdadero	Verdadero	Verdadero	Verdadero	Verdadero	No estoy seguro/a	No estoy seguro/a	No estoy seguro/a	Falso	No estoy seguro/a	No estoy seguro/a	Verdadero	Falso	No estoy seguro/a	Verdadero
Zamora	Zamora	28	Masculino	UCE	Administración Publica	1-3	SARS-COV-2	De origen natural	No estoy seguro/a	No estoy seguro/a	Verdadero	Verdadero	Verdadero	Verdadero	Falso	Falso	Verdadero	Falso	Falso	Verdadero	Verdadero	Verdadero	Verdadero	Verdadero	Falso	Verdadero	Verdadero	Falso	No estoy seguro/a	Falso	Falso	Falso	Falso	Verdadero
Quito	Quito	26	Femenino	UCE	Arquitectura	7-9	SARS-COV-2	Creado en laboratorio	Un complot mediático	No estoy seguro/a	Verdadero	Verdadero	Verdadero	Verdadero	Falso	Falso	Verdadero	Falso	Verdadero	Verdadero	Verdadero	Verdadero	Verdadero	Verdadero	No estoy seguro/a	No estoy seguro/a	Verdadero	Verdadero	verdadero	Verdadero	Falso	Falso	Falso	Verdadero
Quito	Quito	19	Femenino	UCE	Odontología	1-3	SARS-COV-2	Creado en laboratorio	Una entidad capaz de adaptarse y evolucionar	1 - 10	Falso	Verdadero	Verdadero	Verdadero	Falso	Verdadero	Verdadero	Falso	Verdadero	Verdadero	Verdadero	Verdadero	Verdadero	Verdadero	Falso	Verdadero	Verdadero	Falso	Falso	Falso	Verdadero	Falso	Falso	Verdadero
Latacunga	Latacunga	18	Masculino	UTC	Veterinaria	1-3	SARS-COV-2	Creado en laboratorio	Un complot mediático	11 - 20	Falso	Verdadero	Verdadero	Verdadero	Falso	Falso	Verdadero	Falso	Verdadero	Verdadero	Verdadero	Verdadero	Verdadero	Verdadero	Falso	Falso	Verdadero	Falso	Falso	No estoy seguro/a	Verdadero	Falso	Falso	Verdadero
Quito	Quito	25	Femenino	UCE	Química Farmacéutica	4-6	SARS-COV-2	De origen natural	Una entidad capaz de adaptarse y evolucionar	1 - 10	Verdadero	Verdadero	Verdadero	Verdadero	Falso	Falso	Verdadero	Verdadero	Verdadero	Verdadero	Verdadero	Verdadero	Verdadero	Verdadero	Falso	Verdadero	Verdadero	Falso	Falso	Verdadero	Verdadero	Falso	Falso	Verdadero	Algunas preguntas deberían estar mejor formulada ya que se prevee doble respuesta.
A	A	34	Otro	UDLA	S	1-3	SARS-COV-2	Creado en laboratorio	Una entidad capaz de adaptarse y evolucionar	1 - 10	Verdadero	Verdadero	Verdadero	Verdadero	Verdadero	Falso	Verdadero	Falso	Verdadero	Verdadero	Verdadero	Verdadero	Verdadero	Verdadero	Falso	Verdadero	Verdadero	Falso	Falso	Falso	Verdadero	Falso	Falso	Verdadero
Quito	Quito	21	Masculino	UCE	Ing. Agronómica	7-9	SARS-COV-2	Creado en laboratorio	Una entidad capaz de adaptarse y evolucionar	11 - 20	Verdadero	Verdadero	Verdadero	Verdadero	Verdadero	Falso	Verdadero	Verdadero	Verdadero	Verdadero	Verdadero	Verdadero	Verdadero	Verdadero	Falso	Verdadero	Verdadero	Falso	verdadero	Verdadero	Verdadero	Falso	Falso	Verdadero
Cuenca	Cuenca	19	Femenino	YACHAY	Biomedicina	1-3	SARS-COV-2	De origen natural	Una entidad capaz de adaptarse y evolucionar	1 - 10	Verdadero	Verdadero	Verdadero	Verdadero	Falso	Falso	Verdadero	Verdadero	Verdadero	Verdadero	Verdadero	Verdadero	Verdadero	Verdadero	Falso	Verdadero	Verdadero	Falso	Falso	Verdadero	Verdadero	Falso	Falso	Verdadero
Quito	Loja	21	Femenino	UCE	Ingeniería en Sistemas de Información	1-3	COVID-19	No estoy seguro/a	Una entidad capaz de adaptarse y evolucionar	No estoy seguro/a	No estoy seguro/a	Verdadero	Verdadero	Verdadero	No estoy seguro/a	Falso	Verdadero	Verdadero	Verdadero	Verdadero	Verdadero	Verdadero	Verdadero	Verdadero	No estoy seguro/a	No estoy seguro/a	No estoy seguro/a	Falso	No estoy seguro/a	Verdadero	No estoy seguro/a	Falso	Falso	Verdadero
Tulcán	Tulcán	18	Femenino	YACHAY	Biomedicina	1-3	SARS-COV-2	Creado en laboratorio	Una entidad capaz de adaptarse y evolucionar	No estoy seguro/a	No estoy seguro/a	No estoy seguro/a	Verdadero	No estoy seguro/a	Falso	Falso	Verdadero	Verdadero	Verdadero	Verdadero	No estoy seguro/a	No estoy seguro/a	Verdadero	No estoy seguro/a	Falso	No estoy seguro/a	No estoy seguro/a	Falso	Falso	Falso	No estoy seguro/a	No estoy seguro/a	Falso	Verdadero
Sangolquí	Sangolquí	20	Femenino	YACHAY	Biomedicina	1-3	SARS-COV-2	Creado en laboratorio	Una entidad capaz de adaptarse y evolucionar	1 - 10	Verdadero	Verdadero	Verdadero	Verdadero	No estoy seguro/a	Falso	Verdadero	Verdadero	Verdadero	Verdadero	Verdadero	Verdadero	Verdadero	Verdadero	Falso	No estoy seguro/a	Verdadero	Falso	Falso	Falso	Verdadero	Falso	Falso	Verdadero	Es una muy buena encuesta
Cuenca	Cuenca	18	Masculino	YACHAY	Física	1-3	SARS-COV-2	De origen natural	Una entidad capaz de adaptarse y evolucionar	1 - 10	Verdadero	Verdadero	Verdadero	Verdadero	Falso	Falso	Verdadero	Verdadero	Verdadero	Verdadero	Verdadero	Verdadero	Verdadero	Verdadero	Falso	Verdadero	Verdadero	Falso	Falso	Falso	Verdadero	Falso	Falso	Verdadero	Se podría analizar la posición de los participantes, o personas en general, en cuanto al avance de las vacunas.
Cañar	Cañar	19	Femenino	YACHAY	Educación en Ciencias Experimentales	4-6	SARS-COV-2	De origen natural	Una entidad capaz de adaptarse y evolucionar	No estoy seguro/a	No estoy seguro/a	Verdadero	No estoy seguro/a	Verdadero	No estoy seguro/a	Falso	Verdadero	No estoy seguro/a	Verdadero	Verdadero	Verdadero	Verdadero	No estoy seguro/a	Verdadero	No estoy seguro/a	Verdadero	Falso	Falso	No estoy seguro/a	No estoy seguro/a	Falso	Falso	Falso	Verdadero	Excelente encuesta. Preguntas importantes que toda persona debe saber sobre el covid-19
otavalo	otavalo	20	Masculino	YACHAY	polimeros	1-3	SARS-COV-2	De origen natural	Una entidad capaz de adaptarse y evolucionar	1 - 10	Verdadero	Verdadero	Verdadero	Verdadero	Falso	Verdadero	Verdadero	Verdadero	Falso	Verdadero	Falso	Verdadero	Verdadero	Verdadero	Verdadero	Verdadero	Verdadero	Verdadero	verdadero	Verdadero	Verdadero	verdadero	Verdadero	Verdadero	si
Quito	Quito	25	Masculino	UCE	Laboratorio Clínico	4-6	SARS-COV-2	De origen natural	Una entidad capaz de adaptarse y evolucionar	1 - 10	Falso	Verdadero	Verdadero	Verdadero	Falso	Falso	Verdadero	Verdadero	Verdadero	Verdadero	Verdadero	Verdadero	Verdadero	Verdadero	Falso	Verdadero	Verdadero	Falso	Falso	Falso	Verdadero	Falso	Falso	Verdadero
Puyo	Puyo	22	Femenino	UCE	Arquitectura	7-9	SARS-COV-2	Creado en laboratorio	Una entidad capaz de adaptarse y evolucionar	No estoy seguro/a	Verdadero	Verdadero	Verdadero	Verdadero	No estoy seguro/a	Falso	Verdadero	No estoy seguro/a	Verdadero	Verdadero	Verdadero	Verdadero	Verdadero	Verdadero	No estoy seguro/a	No estoy seguro/a	Verdadero	Falso	Falso	Verdadero	Verdadero	Falso	Falso	Verdadero
Quito	Quito	21	Masculino	UCE	Pedagogía en Historia y Ciencias Sociales	4-6	SARS-COV-2	Creado en laboratorio	Un complot mediático	51 - 100	Verdadero	Verdadero	Verdadero	Verdadero	Verdadero	Falso	Verdadero	Verdadero	Verdadero	Verdadero	Verdadero	Verdadero	Verdadero	Verdadero	Falso	Verdadero	Verdadero	Verdadero	verdadero	Verdadero	Falso	Falso	Verdadero	Verdadero	Buenas preguntas
Quito	Quito	18	Masculino	YACHAY	Física	1-3	SARS-COV-2	De origen natural	Una entidad capaz de adaptarse y evolucionar	11 - 20	Verdadero	Verdadero	Verdadero	Verdadero	Falso	Falso	Verdadero	Falso	Verdadero	Verdadero	Verdadero	Verdadero	Verdadero	Verdadero	Falso	No estoy seguro/a	Verdadero	Falso	Falso	Falso	Verdadero	Falso	Falso	Verdadero
Quito	Quito	23	Masculino	UCE	Ingeniería Agronómica	7-9	COVID-19	No estoy seguro/a	Una entidad capaz de adaptarse y evolucionar	11 - 20	Falso	Verdadero	Verdadero	Verdadero	Falso	Falso	Verdadero	Falso	Verdadero	Verdadero	Verdadero	Verdadero	Verdadero	Verdadero	Falso	Falso	Verdadero	Falso	Falso	Falso	Verdadero	Falso	Falso	Verdadero
Quito	Quito	22	Femenino	UCE	Biología	4-6	SARS-COV-2	De origen natural	Una entidad capaz de adaptarse y evolucionar	21 - 30	Falso	Verdadero	Verdadero	Verdadero	No estoy seguro/a	Falso	Verdadero	Verdadero	Verdadero	Verdadero	Verdadero	Verdadero	Verdadero	Verdadero	Falso	Verdadero	Verdadero	Falso	Falso	No estoy seguro/a	Falso	Falso	No estoy seguro/a	Verdadero
Quito	Quito	19	Femenino	YACHAY	Biología	1-3	COVID-19	No estoy seguro/a	Un complot mediático	No estoy seguro/a	Falso	Verdadero	Verdadero	Verdadero	Falso	Falso	Verdadero	Falso	Verdadero	Falso	Verdadero	Verdadero	Verdadero	Verdadero	Falso	Verdadero	No estoy seguro/a	No estoy seguro/a	Falso	No estoy seguro/a	No estoy seguro/a	No estoy seguro/a	Falso	Verdadero
Ibarra	Atuntaqui	18	Femenino	YACHAY	Petroquimica	1-3	SARS-COV-2	No estoy seguro/a	Una entidad capaz de adaptarse y evolucionar	No estoy seguro/a	No estoy seguro/a	Verdadero	No estoy seguro/a	Verdadero	Falso	Falso	Verdadero	No estoy seguro/a	Verdadero	Verdadero	Verdadero	Verdadero	Verdadero	Verdadero	Falso	No estoy seguro/a	No estoy seguro/a	Falso	Falso	No estoy seguro/a	Verdadero	Falso	Falso	Verdadero	La encuesta me parece muy interesante y precisa, espero que sea de mucha ayuda para la investigación.
Ibarra	Quito	21	Femenino	UTN	Ingeniería en Biotecnología	1-3	SARS-COV-2	De origen natural	Una entidad capaz de adaptarse y evolucionar	21 - 30	Verdadero	Verdadero	Verdadero	Verdadero	Falso	Falso	Verdadero	Falso	Verdadero	Verdadero	Verdadero	Verdadero	Verdadero	Verdadero	Verdadero	Verdadero	Verdadero	Falso	Falso	Falso	Verdadero	Falso	Falso	Verdadero	No tengo ninguna sugerencia todo estuvo muy bien realizado
Ibarra	Ibarra	20	Femenino	Universidad Técnica del Norte	Biotecnología	1-3	SARS-COV-2	De origen natural	Una entidad capaz de adaptarse y evolucionar	1 - 10	No estoy seguro/a	Verdadero	Verdadero	Verdadero	Falso	Falso	Verdadero	Falso	Verdadero	Verdadero	Verdadero	Verdadero	Verdadero	Verdadero	No estoy seguro/a	No estoy seguro/a	Verdadero	Falso	Falso	Verdadero	Verdadero	Falso	Falso	Verdadero
Atuntaqui	Ibarra	21	Masculino	UTN	ING. Biotecnología	4-6	SARS-COV-2	Creado en laboratorio	Una entidad capaz de adaptarse y evolucionar	No estoy seguro/a	Falso	No estoy seguro/a	Verdadero	Verdadero	Falso	Falso	Verdadero	Falso	Verdadero	Verdadero	Verdadero	Verdadero	Verdadero	Verdadero	Falso	Verdadero	Verdadero	Falso	Falso	Falso	Verdadero	Falso	Falso	Falso
Ibarra	Ibarra	21	Masculino	UTN	Biotecnología	4-6	SARS-COV-2	De origen natural	Una entidad capaz de adaptarse y evolucionar	51 - 100	No estoy seguro/a	Verdadero	Verdadero	Verdadero	Falso	Falso	Verdadero	Falso	Verdadero	Verdadero	Verdadero	Verdadero	Verdadero	Verdadero	Verdadero	Falso	Verdadero	Falso	Falso	Verdadero	Verdadero	Falso	Falso	Verdadero
Cotacachi	Cotacachi	23	Femenino	UTN	Ingenieria en Biotecnología	1-3	SARS-COV-2	De origen natural	Una entidad capaz de adaptarse y evolucionar	1 - 10	Verdadero	Verdadero	Verdadero	Verdadero	Falso	Verdadero	Verdadero	Falso	Verdadero	Verdadero	Verdadero	Verdadero	Verdadero	Verdadero	Falso	Verdadero	Verdadero	Falso	Falso	Falso	Verdadero	Falso	Verdadero	Verdadero	Creo que las preguntas son muy ambiguas
Atuntaqui	Ibarra	21	Femenino	UTN	Ingeniería en Biotecnología	4-6	SARS-COV-2	No estoy seguro/a	Una entidad capaz de adaptarse y evolucionar	No estoy seguro/a	Verdadero	Verdadero	Verdadero	Verdadero	Falso	Falso	Verdadero	Verdadero	Verdadero	Verdadero	Verdadero	Verdadero	Verdadero	Verdadero	No estoy seguro/a	Verdadero	Verdadero	Falso	No estoy seguro/a	Verdadero	Verdadero	Falso	Falso	Verdadero	Tienen que haber la opción: no existen pruebas o datos que respalden esto.
Ibarra	Tulcán	20	Femenino	UTN	Ingeniería en Biotecnología	1-3	SARS-COV-2	No estoy seguro/a	Una entidad capaz de adaptarse y evolucionar	31 - 40	Verdadero	Verdadero	Verdadero	Verdadero	Falso	Falso	Verdadero	Falso	Verdadero	Verdadero	Verdadero	Verdadero	Verdadero	Verdadero	No estoy seguro/a	Verdadero	Falso	Falso	Falso	Falso	Verdadero	Falso	Falso	Verdadero
Ibarra	Quito	22	Femenino	UTN	Biotecnología	4-6	SARS-COV-2	De origen natural	Una entidad capaz de adaptarse y evolucionar	1 - 10	Verdadero	Verdadero	Verdadero	Verdadero	Verdadero	Falso	Verdadero	Verdadero	Verdadero	Verdadero	Verdadero	Verdadero	Verdadero	Verdadero	Falso	Verdadero	Verdadero	Falso	Falso	No estoy seguro/a	Verdadero	Falso	Falso	Verdadero	Felicitaciones por este tipo de iniciativas que buscan concientizar e informar sobre la situación actual y palpar el trabajo realizado por científicos ecuatorianos en la lucha contra COVID-19
Atuntaqui	Atuntaqui	24	Masculino	UTN	Ingeniería en Biotecnología	4-6	SARS-COV-2	De origen natural	Una entidad capaz de adaptarse y evolucionar	1 - 10	Verdadero	Verdadero	Verdadero	Verdadero	Falso	Falso	Verdadero	Falso	Verdadero	Verdadero	Verdadero	Verdadero	Verdadero	Verdadero	Verdadero	Verdadero	Verdadero	Falso	Falso	Falso	Falso	Falso	No estoy seguro/a	Verdadero	Una pregunta de reconmendación es conocer cuanto tiempo el virus se mantien en la ropa o prendas que utilizamos día con día
Ibarra	Ibarra	20	Femenino	UTN	Biotecnología	1-3	SARS-COV-2	De origen natural	Una entidad capaz de adaptarse y evolucionar	No estoy seguro/a	Falso	Verdadero	Verdadero	Verdadero	Falso	Falso	Verdadero	Falso	Verdadero	Verdadero	Verdadero	Verdadero	Verdadero	Verdadero	No estoy seguro/a	Verdadero	Verdadero	Falso	Falso	Falso	No estoy seguro/a	Falso	Falso	Verdadero
Otavalo	Otavalo	20	Masculino	UTN	Ingeniería en Biotecnología	1-3	SARS-COV-2	De origen natural	Una entidad capaz de adaptarse y evolucionar	1 - 10	Verdadero	Verdadero	Verdadero	Verdadero	Falso	Falso	Verdadero	No estoy seguro/a	Verdadero	Verdadero	Verdadero	Verdadero	Verdadero	Verdadero	Falso	Verdadero	Verdadero	Falso	Falso	Verdadero	Verdadero	Falso	Falso	Verdadero
Ibarra	Guayaquil	25	Femenino	Universidad Técnica del Norte	Biotecnología	4-6	SARS-COV-2	Creado en laboratorio	Una entidad capaz de adaptarse y evolucionar	11 - 20	Verdadero	Verdadero	Verdadero	Verdadero	No estoy seguro/a	Falso	Verdadero	Falso	Verdadero	Verdadero	Verdadero	Verdadero	Verdadero	Verdadero	No estoy seguro/a	Falso	Verdadero	Falso	Falso	Verdadero	Falso	Falso	Falso	Verdadero
Ibarra	Ibarra	20	Masculino	UTN	Biotecnología	1-3	SARS-COV-2	Creado en laboratorio	Una entidad capaz de adaptarse y evolucionar	1 - 10	No estoy seguro/a	Verdadero	Verdadero	No estoy seguro/a	Falso	Falso	Verdadero	No estoy seguro/a	Verdadero	Verdadero	Verdadero	Verdadero	Verdadero	Verdadero	No estoy seguro/a	No estoy seguro/a	Verdadero	Falso	Falso	No estoy seguro/a	Verdadero	Falso	Falso	Verdadero
Quito	Quito	20	Masculino	UTN	Ingenierían en Biotecnología	4-6	SARS-COV-2	No estoy seguro/a	Una entidad capaz de adaptarse y evolucionar	11 - 20	Verdadero	Verdadero	Verdadero	Verdadero	Falso	Falso	Verdadero	Verdadero	Verdadero	Verdadero	Verdadero	Verdadero	Verdadero	Verdadero	Falso	Verdadero	Verdadero	Falso	Falso	No estoy seguro/a	Verdadero	Falso	Falso	Verdadero
Ibarra	El Angel	25	Masculino	UTN	Ingeniera en Biotecnologia	7-9	SARS-COV-2	No estoy seguro/a	Una entidad capaz de adaptarse y evolucionar	1 - 10	Verdadero	Verdadero	Verdadero	Verdadero	Falso	Falso	Verdadero	Falso	Verdadero	Verdadero	Verdadero	Verdadero	Verdadero	Verdadero	Falso	Verdadero	Verdadero	Falso	Falso	Verdadero	Verdadero	Falso	Falso	Verdadero
Ibarra	Ibarra	22	Femenino	UTN	Biotecnologia	1-3	SARS-COV-2	No estoy seguro/a	Una entidad capaz de adaptarse y evolucionar	21 - 30	Verdadero	Verdadero	Verdadero	Verdadero	Falso	Falso	Verdadero	Falso	Verdadero	Verdadero	Verdadero	Verdadero	Verdadero	Verdadero	No estoy seguro/a	No estoy seguro/a	Verdadero	Falso	Falso	Falso	Verdadero	Falso	Falso	Verdadero
Ibarra	Ibarra	28	Masculino	UTN	Biotecnología	1-3	SARS-COV-2	De origen natural	Una entidad capaz de adaptarse y evolucionar	11 - 20	Falso	Verdadero	Verdadero	Verdadero	Falso	Falso	Verdadero	Verdadero	Verdadero	Verdadero	Verdadero	Verdadero	Verdadero	Verdadero	Falso	Falso	Verdadero	Falso	Falso	Falso	Verdadero	Falso	Falso	Verdadero
Ibarra	Ibarra	24	Femenino	UTN	Biotecnología	4-6	SARS-COV-2	De origen natural	Una entidad capaz de adaptarse y evolucionar	11 - 20	Verdadero	Verdadero	Verdadero	Verdadero	Falso	Falso	Verdadero	Falso	Verdadero	Verdadero	Verdadero	Verdadero	Verdadero	Verdadero	Falso	Verdadero	Verdadero	Falso	Falso	Falso	Verdadero	Falso	Falso	Verdadero
Ibarra	Ibarra	20	Femenino	UTN	Biotecnología	1-3	SARS-COV-2	De origen natural	Una entidad capaz de adaptarse y evolucionar	1 - 10	No estoy seguro/a	Verdadero	Verdadero	Verdadero	Falso	Falso	Verdadero	Falso	Verdadero	Verdadero	Verdadero	Verdadero	Verdadero	Verdadero	No estoy seguro/a	No estoy seguro/a	No estoy seguro/a	No estoy seguro/a	Falso	Falso	Falso	verdadero	Falso	Verdadero
Quito	Tulcán	23	Masculino	UCE	Medicina	7-9	SARS-COV-2	Creado en laboratorio	Una entidad capaz de adaptarse y evolucionar	11 - 20	Verdadero	Verdadero	Verdadero	Verdadero	Falso	Falso	Verdadero	No estoy seguro/a	Verdadero	Verdadero	Verdadero	Verdadero	Verdadero	Verdadero	No estoy seguro/a	Verdadero	Verdadero	Falso	Falso	No estoy seguro/a	Verdadero	Falso	Falso	Verdadero	Agradezco por el estudio, la comunidad universitaria debería ser la más idónea para aplicar y concientizar a la ciudadanía de lo que vivimos actualmente.
Tulcán	Tulcán	20	Masculino	UTN(Universidad Técnica del Norte)	Ingeniería en biotecnología	1-3	SARS-COV-2	De origen natural	No estoy seguro/a	1 - 10	Verdadero	Verdadero	Verdadero	Verdadero	Falso	Falso	Verdadero	Verdadero	No estoy seguro/a	Verdadero	Verdadero	Verdadero	Verdadero	Verdadero	Falso	No estoy seguro/a	No estoy seguro/a	No estoy seguro/a	Falso	Falso	Verdadero	Falso	Falso	Verdadero
Ibarra	Cotacachi	21	Femenino	UTN	Biotecnología	4-6	SARS-COV-2	Creado en laboratorio	Una entidad capaz de adaptarse y evolucionar	21 - 30	Verdadero	Verdadero	Verdadero	Verdadero	Falso	Falso	Verdadero	Falso	Verdadero	Verdadero	Verdadero	Verdadero	Verdadero	Verdadero	No estoy seguro/a	Verdadero	Verdadero	Falso	Falso	Verdadero	No estoy seguro/a	Falso	Falso	Verdadero	Necesario realizar una inducción con información comprobada científicamente sobre el COVID-19.
Ibarra	Ibarra	26	Femenino	UTN	Universidad Técnica del Norte	4-6	SARS-COV-2	De origen natural	Una entidad capaz de adaptarse y evolucionar	No estoy seguro/a	Verdadero	Verdadero	Verdadero	Verdadero	Falso	Falso	Verdadero	No estoy seguro/a	Verdadero	Verdadero	Verdadero	Verdadero	Verdadero	Verdadero	No estoy seguro/a	Verdadero	Verdadero	Falso	Falso	No estoy seguro/a	Falso	Falso	Verdadero	Verdadero
Atuntaqui	Ibarra	21	Femenino	UTN	Ingeniería en Biotecnología	4-6	SARS-COV-2	De origen natural	Una entidad capaz de adaptarse y evolucionar	No estoy seguro/a	Falso	Verdadero	Verdadero	Verdadero	Falso	Falso	Verdadero	Verdadero	Verdadero	Verdadero	Verdadero	Verdadero	Verdadero	Verdadero	No estoy seguro/a	Verdadero	Verdadero	Falso	No estoy seguro/a	Verdadero	Verdadero	Falso	Falso	Verdadero	Debe haber una opción que diga: No existen pruebas ni datos que afirmen esto.
Ibarra	Ibarra	21	Femenino	UTN	Ingeniería en Biotecnología	4-6	SARS-COV-2	Creado en laboratorio	Una entidad capaz de adaptarse y evolucionar	1 - 10	Verdadero	Verdadero	Verdadero	Verdadero	Falso	Falso	Verdadero	Falso	Verdadero	Verdadero	Verdadero	Verdadero	Verdadero	Verdadero	Falso	Verdadero	Verdadero	Falso	Falso	Falso	Falso	verdadero	Falso	Verdadero
Otavalo	Otavalo	21	Masculino	UTN	Biotecnología	4-6	SARS-COV-2	De origen natural	Una entidad capaz de adaptarse y evolucionar	1 - 10	Verdadero	Verdadero	Verdadero	Verdadero	Verdadero	Falso	Verdadero	Falso	Verdadero	Verdadero	Verdadero	Verdadero	Verdadero	Verdadero	Verdadero	Verdadero	Verdadero	Falso	Falso	Verdadero	No estoy seguro/a	Falso	Falso	Verdadero
Quito	QuITO	26	Femenino	UCE	Ingeniería Civil	9 en adelante	SARS-COV-2	No estoy seguro/a	Una entidad capaz de adaptarse y evolucionar	No estoy seguro/a	Falso	Verdadero	Verdadero	Verdadero	Falso	Falso	Verdadero	Verdadero	No estoy seguro/a	Verdadero	Verdadero	Verdadero	Falso	Verdadero	Falso	Verdadero	Falso	Falso	Falso	Falso	Verdadero	Falso	Falso	Verdadero
Tulcan	Tulcan	21	Masculino	UTN	Ingenieria en Biotecnologia	1-3	SARS-COV-2	Creado en laboratorio	Un complot mediático	11 - 20	Verdadero	Verdadero	No estoy seguro/a	Verdadero	Verdadero	Falso	Verdadero	No estoy seguro/a	Verdadero	Verdadero	Verdadero	Verdadero	Verdadero	Verdadero	Verdadero	No estoy seguro/a	Verdadero	Falso	No estoy seguro/a	Verdadero	Falso	Falso	Verdadero	Verdadero
Atuntaqui	Atuntaqui	22	Masculino	UTN	Biotecnología	4-6	SARS-COV-2	No estoy seguro/a	Una entidad capaz de adaptarse y evolucionar	1 - 10	Verdadero	Verdadero	Verdadero	Verdadero	Falso	Falso	Verdadero	Verdadero	Verdadero	Verdadero	Verdadero	Verdadero	Verdadero	Verdadero	Falso	Verdadero	Verdadero	Falso	Falso	Falso	Verdadero	Falso	Falso	Verdadero	Es una gran iniciativa la creación de este tipo de encuestas, ya que posteriormente servirá como un registro que ayude a tener un mejor manejo de situaciones que ameriten el acceso a estos datos, sea para estudios de investigación o conocimiento general.
Sangolqui	Quito	22	Femenino	UTN	Biotecnologia	4-6	SARS-COV-2	De origen natural	Una entidad capaz de adaptarse y evolucionar	31 - 40	Verdadero	Verdadero	Verdadero	Verdadero	Falso	Falso	Verdadero	Verdadero	Verdadero	Verdadero	Verdadero	Verdadero	Verdadero	Verdadero	Falso	Verdadero	Verdadero	Falso	Falso	Falso	Verdadero	Falso	Falso	Verdadero	Ninguan
Ibarra	Carchi	21	Femenino	Universidad Técnica del Norte	Biotecnología	4-6	SARS-COV-2	De origen natural	Una entidad capaz de adaptarse y evolucionar	1 - 10	Falso	Verdadero	Verdadero	Verdadero	Verdadero	Falso	Verdadero	Falso	Verdadero	Falso	Verdadero	Verdadero	Verdadero	Verdadero	Falso	Verdadero	Verdadero	Falso	Falso	Falso	Verdadero	Falso	Falso	Verdadero
Quito	Saquisili	23	Femenino	UCE	Medicina	7-9	SARS-COV-2	De origen natural	Una entidad capaz de adaptarse y evolucionar	11 - 20	No estoy seguro/a	Verdadero	Verdadero	Verdadero	Falso	Falso	Verdadero	Verdadero	Verdadero	Verdadero	Verdadero	Verdadero	Verdadero	No estoy seguro/a	Falso	Verdadero	Verdadero	Falso	Falso	Falso	Verdadero	Falso	Falso	Verdadero
Ibarra	Ibarra	20	Masculino	UTN	Biotecnologia	4-6	SARS-COV-2	De origen natural	Una entidad capaz de adaptarse y evolucionar	No estoy seguro/a	Falso	Verdadero	Verdadero	Verdadero	Falso	Falso	Verdadero	Falso	Verdadero	Verdadero	Verdadero	Verdadero	Verdadero	Verdadero	Falso	Verdadero	Verdadero	Falso	Falso	Falso	Verdadero	Falso	Falso	Verdadero
Quito	Quito	20	Masculino	UTN	Ingenierían en Biotecnología	4-6	SARS-COV-2	No estoy seguro/a	Una entidad capaz de adaptarse y evolucionar	11 - 20	Verdadero	Verdadero	Verdadero	Verdadero	Falso	Falso	Verdadero	Verdadero	Verdadero	Verdadero	Verdadero	Verdadero	Verdadero	Verdadero	Falso	Verdadero	Verdadero	Falso	Falso	No estoy seguro/a	Verdadero	Falso	Falso	Verdadero
Tulcan	Tulcan	20	Femenino	UTN	Biotecnología	1-3	SARS-COV-2	De origen natural	Una entidad capaz de adaptarse y evolucionar	51 - 100	Falso	Verdadero	Verdadero	Verdadero	Verdadero	Falso	Verdadero	Falso	Verdadero	Verdadero	Verdadero	Verdadero	Verdadero	Verdadero	Verdadero	No estoy seguro/a	Verdadero	Verdadero	Falso	Falso	Verdadero	Falso	Falso	Verdadero
Ibarra	Ibarra	21	Masculino	UTN	Ingeniería en biotecnología	1-3	SARS-COV-2	De origen natural	Una entidad capaz de adaptarse y evolucionar	11 - 20	Verdadero	Verdadero	Verdadero	Verdadero	Falso	Falso	Verdadero	Verdadero	Verdadero	Verdadero	Verdadero	Verdadero	Verdadero	Verdadero	No estoy seguro/a	Verdadero	Verdadero	Falso	Falso	Verdadero	Verdadero	verdadero	Falso	Verdadero
Ibarra	Ibarra	20	Masculino	UTN	Biotecnología	4-6	SARS-COV-2	Creado en laboratorio	Una entidad capaz de adaptarse y evolucionar	No estoy seguro/a	No estoy seguro/a	Falso	Falso	Verdadero	Falso	Falso	Verdadero	Verdadero	Verdadero	Verdadero	Verdadero	Verdadero	Verdadero	Verdadero	Falso	Verdadero	Verdadero	Falso	Falso	No estoy seguro/a	Verdadero	Falso	Falso	Verdadero
Quito	Guaranda	21	Masculino	UCE	Medicina	1-3	SARS-COV-2	De origen natural	Una entidad capaz de adaptarse y evolucionar	1 - 10	Verdadero	Verdadero	Verdadero	Verdadero	Falso	Falso	Verdadero	Falso	Verdadero	Verdadero	Verdadero	Verdadero	Verdadero	Verdadero	Falso	Verdadero	Verdadero	Verdadero	Falso	Falso	Falso	Falso	Falso	Verdadero
Otavalo	Otavalo	19	Femenino	UTN	Biotecnología	1-3	SARS-COV-2	Creado en laboratorio	Una entidad capaz de adaptarse y evolucionar	11 - 20	Verdadero	Verdadero	Falso	Verdadero	Verdadero	Falso	Verdadero	Falso	Verdadero	Verdadero	Verdadero	Verdadero	Verdadero	Verdadero	Falso	Verdadero	Verdadero	Falso	Falso	Falso	Verdadero	Falso	Falso	Verdadero
Atuntaqui	Cayambe	21	Femenino	UTN	Biotecnología	1-3	SARS-COV-2	Creado en laboratorio	Una entidad capaz de adaptarse y evolucionar	41 - 50	Verdadero	Verdadero	Verdadero	Verdadero	Falso	Falso	Verdadero	Falso	Verdadero	Verdadero	Verdadero	Verdadero	Verdadero	Verdadero	Verdadero	Verdadero	Falso	Falso	Falso	Falso	Verdadero	verdadero	Falso	Verdadero
Cayambe	Cayambe	20	Femenino	UTN	Biotecnología	4-6	SARS-COV-2	De origen natural	Una entidad capaz de adaptarse y evolucionar	No estoy seguro/a	No estoy seguro/a	Verdadero	Verdadero	Verdadero	No estoy seguro/a	Falso	Verdadero	Verdadero	Verdadero	Verdadero	Verdadero	Verdadero	No estoy seguro/a	Verdadero	No estoy seguro/a	Verdadero	Verdadero	Falso	Falso	No estoy seguro/a	Verdadero	Falso	Falso	Verdadero	Solicitar información sobre cuales respuestas eran correctas.
Quito	Quito	25	Femenino	UCE	Artes plásticas	7-9	SARS-COV-2	No estoy seguro/a	No estoy seguro/a	21 - 30	Verdadero	Verdadero	Verdadero	Verdadero	Falso	Falso	Verdadero	Falso	Verdadero	Verdadero	Verdadero	Verdadero	Verdadero	Verdadero	No estoy seguro/a	Falso	Verdadero	Falso	Falso	Verdadero	Verdadero	Falso	Falso	Verdadero
Ibarra	Ibarra	22	Masculino	UTN	Biotecnologia	4-6	COVID-19	De origen natural	Una entidad capaz de adaptarse y evolucionar	51 - 100	No estoy seguro/a	Verdadero	Verdadero	Verdadero	Falso	Falso	Verdadero	Falso	Verdadero	Verdadero	Verdadero	Verdadero	Verdadero	Verdadero	No estoy seguro/a	Verdadero	Verdadero	No estoy seguro/a	Falso	Verdadero	Verdadero	Falso	Falso	Verdadero
Quito	Quito	35	Femenino	UCE	Contabilidad y auditoría	1-3	SARS-COV-2	Creado en laboratorio	Una entidad capaz de adaptarse y evolucionar	1 - 10	No estoy seguro/a	Verdadero	Verdadero	Verdadero	Falso	Falso	Verdadero	No estoy seguro/a	Verdadero	Verdadero	Verdadero	Verdadero	Verdadero	Verdadero	Falso	No estoy seguro/a	Falso	Falso	Falso	Verdadero	Falso	Falso	Falso	Verdadero
Quitó	Quito	35	Femenino	UCE	Contabilidad y auditoría	1-3	SARS-COV-2	Creado en laboratorio	Una entidad capaz de adaptarse y evolucionar	11 - 20	Falso	Verdadero	Verdadero	Verdadero	Falso	Falso	Verdadero	No estoy seguro/a	Verdadero	Verdadero	Verdadero	Verdadero	Verdadero	Verdadero	Falso	No estoy seguro/a	Verdadero	Falso	Falso	Verdadero	Verdadero	Falso	Falso	Verdadero
QUITO	QUITO	38	Femenino	UCE	CONTABILIDAD Y AUDITORIA	7-9	COVID-19	Creado en laboratorio	Una entidad capaz de adaptarse y evolucionar	31 - 40	Verdadero	Verdadero	Verdadero	Verdadero	Falso	Falso	Verdadero	Falso	Verdadero	Verdadero	Verdadero	Verdadero	Verdadero	Verdadero	No estoy seguro/a	No estoy seguro/a	Verdadero	Falso	Falso	Falso	Verdadero	Falso	Falso	Verdadero
Quito	Esmeraldas	21	Masculino	UCE	Contabilidad y Auditoria	1-3	COVID-19	Creado en laboratorio	Una entidad capaz de adaptarse y evolucionar	21 - 30	Falso	Verdadero	Verdadero	Verdadero	Falso	Falso	Verdadero	Falso	Verdadero	Verdadero	Verdadero	Verdadero	Verdadero	Verdadero	Falso	Verdadero	Verdadero	Falso	Falso	Verdadero	Verdadero	Falso	Verdadero	Verdadero
Santo Domingo	Santo Domingo de los Tsáchilas	21	Masculino	UCE	Ingeniería civil	1-3	SARS-COV-2	De origen natural	Un compuesto químico	31 - 40	Falso	Verdadero	Verdadero	Verdadero	Falso	Falso	Verdadero	Verdadero	Verdadero	Verdadero	Verdadero	Verdadero	Verdadero	Verdadero	Falso	Falso	Falso	Falso	Falso	Falso	Falso	Falso	Falso	Verdadero
Ibarra	Ibarra	20	Masculino	Universidad Técnica del Norte	Biotecnología	4-6	SARS-COV-2	De origen natural	Una entidad capaz de adaptarse y evolucionar	1 - 10	Verdadero	Verdadero	Verdadero	Verdadero	Falso	Falso	Verdadero	Falso	Verdadero	Verdadero	Verdadero	Verdadero	Verdadero	Verdadero	Falso	Verdadero	Verdadero	Falso	Falso	Verdadero	Verdadero	Falso	Falso	Verdadero
Quito	Quito	20	Masculino	UCE	Radiología e Imagenología Clínica	1-3	SARS-COV-2	De origen natural	Una entidad capaz de adaptarse y evolucionar	1 - 10	Verdadero	Verdadero	Verdadero	Verdadero	Falso	Falso	Verdadero	Verdadero	Verdadero	Verdadero	Verdadero	Verdadero	Verdadero	Verdadero	Falso	Verdadero	Falso	Falso	Falso	No estoy seguro/a	Verdadero	Falso	Falso	Verdadero
quito	Ibarra	18	Femenino	YACHAY	Química	1-3	SARS-COV-2	Creado en laboratorio	Una entidad capaz de adaptarse y evolucionar	No estoy seguro/a	Verdadero	Verdadero	No estoy seguro/a	Verdadero	Falso	Falso	Verdadero	Verdadero	Verdadero	Verdadero	Verdadero	Verdadero	Verdadero	Verdadero	No estoy seguro/a	No estoy seguro/a	No estoy seguro/a	Falso	Falso	Verdadero	Falso	Falso	Falso	Verdadero
Cayambe	Cayambe	20	Femenino	UTN	Biotecnología	1-3	SARS-COV-2	De origen natural	Una entidad capaz de adaptarse y evolucionar	1 - 10	No estoy seguro/a	Falso	Verdadero	Verdadero	Falso	Falso	Verdadero	No estoy seguro/a	Verdadero	Verdadero	Verdadero	Verdadero	Verdadero	Verdadero	No estoy seguro/a	Falso	Verdadero	Falso	Falso	Falso	Verdadero	Falso	Falso	Verdadero
Quifo	Quito	20	Masculino	UCE	Odontología	4-6	SARS-COV-2	De origen natural	Una entidad capaz de adaptarse y evolucionar	11 - 20	Falso	Verdadero	Verdadero	Verdadero	Falso	Falso	Verdadero	Verdadero	Verdadero	Verdadero	Verdadero	Verdadero	Verdadero	Verdadero	Falso	Verdadero	Verdadero	Falso	Falso	Falso	Verdadero	Falso	Falso	Verdadero
Quito	Quito	32	Masculino	UCE	Derecho	9 en adelante	SARS-COV-2	Creado en laboratorio	Una entidad capaz de adaptarse y evolucionar	No estoy seguro/a	Verdadero	Verdadero	Verdadero	Verdadero	Falso	Falso	Verdadero	Verdadero	Verdadero	Verdadero	Verdadero	Verdadero	Verdadero	Verdadero	Falso	Verdadero	Verdadero	Falso	Falso	Falso	Falso	Falso	Falso	Verdadero
Ibarra	Ibarra	20	Femenino	UTN	Ingeniería en Biotecnología	1-3	SARS-COV-2	De origen natural	Una entidad capaz de adaptarse y evolucionar	41 - 50	Verdadero	Verdadero	Verdadero	Verdadero	Falso	Falso	Verdadero	Verdadero	Verdadero	Verdadero	Verdadero	Verdadero	Verdadero	Verdadero	Falso	Verdadero	Verdadero	Verdadero	Falso	No estoy seguro/a	Falso	verdadero	Falso	Verdadero	Me gustó las preguntas que hicieron, logran que la gente compruebe si sabe o no del virus.
Ibarra	Ibarra	20	Femenino	UTN	Ingeniera en Biotecnología	1-3	SARS-COV-2	De origen natural	Una entidad capaz de adaptarse y evolucionar	1 - 10	Verdadero	Verdadero	Verdadero	Verdadero	Falso	Falso	Verdadero	Verdadero	Verdadero	Verdadero	Verdadero	Falso	Verdadero	Verdadero	Falso	Verdadero	Verdadero	Falso	Falso	Falso	Falso	Falso	Falso	Verdadero	Me pareció interesante la encuesta.
Ibarra	Valecia	20	Masculino	UTN	Biotecnología	4-6	SARS-COV-2	De origen natural	Una entidad capaz de adaptarse y evolucionar	1 - 10	Verdadero	Verdadero	Verdadero	Verdadero	Verdadero	Falso	Verdadero	Falso	Verdadero	No estoy seguro/a	Verdadero	Verdadero	Verdadero	Verdadero	Falso	Verdadero	Verdadero	Falso	Falso	Falso	Verdadero	Falso	Falso	Verdadero	Buena encuesta gg
Cayambe	Cayambe	20	Femenino	UTN	Biotecnología	4-6	SARS-COV-2	De origen natural	Una entidad capaz de adaptarse y evolucionar	No estoy seguro/a	No estoy seguro/a	Verdadero	Verdadero	Verdadero	No estoy seguro/a	Falso	Verdadero	No estoy seguro/a	Verdadero	Verdadero	Verdadero	Verdadero	Verdadero	Verdadero	Falso	Verdadero	Verdadero	Falso	Falso	No estoy seguro/a	No estoy seguro/a	No estoy seguro/a	Falso	Verdadero
Quito	Quito	22	Femenino	UCE	Psicología Infantil y Psicorrehabilitación	4-6	COVID-19	No estoy seguro/a	Una entidad capaz de adaptarse y evolucionar	No estoy seguro/a	No estoy seguro/a	Verdadero	Verdadero	Verdadero	Falso	Falso	Verdadero	No estoy seguro/a	Verdadero	Verdadero	Verdadero	Verdadero	Verdadero	Verdadero	Falso	Falso	Verdadero	Falso	No estoy seguro/a	No estoy seguro/a	Verdadero	Falso	Verdadero	Verdadero
Otavalo	Otavalo	21	Masculino	Universidad Técnica del Norte	Ingeniería en Biotecnología	1-3	SARS-COV-2	Creado en laboratorio	Una entidad capaz de adaptarse y evolucionar	1 - 10	Verdadero	Verdadero	Verdadero	Verdadero	Falso	Falso	Verdadero	Falso	Verdadero	Verdadero	Verdadero	Verdadero	Verdadero	Verdadero	Verdadero	Verdadero	Falso	Falso	No estoy seguro/a	Verdadero	Verdadero	Falso	Falso	Verdadero
Otavalo	Otavalo	21	Masculino	Universidad Técnica del Norte	Ingeniería en Biotecnología	1-3	SARS-COV-2	Creado en laboratorio	Una entidad capaz de adaptarse y evolucionar	1 - 10	Verdadero	Verdadero	Verdadero	Verdadero	Falso	Falso	Verdadero	Falso	Verdadero	Verdadero	Verdadero	Verdadero	Verdadero	Verdadero	Verdadero	Verdadero	Falso	Falso	No estoy seguro/a	Verdadero	Verdadero	Falso	Falso	Verdadero
Quito	Quito	24	Masculino	UCE	Ciencias políticas	4-6	SARS-COV-2	De origen natural	Una entidad capaz de adaptarse y evolucionar	1 - 10	No estoy seguro/a	Verdadero	Verdadero	Verdadero	Falso	Falso	Verdadero	No estoy seguro/a	Verdadero	Verdadero	Verdadero	Verdadero	Verdadero	Verdadero	Falso	No estoy seguro/a	Verdadero	Falso	Falso	No estoy seguro/a	Verdadero	Falso	Falso	Verdadero
Ibarra	Ambato	24	Masculino	UTN	Biotecnología	1-3	SARS-COV-2	De origen natural	Una entidad capaz de adaptarse y evolucionar	1 - 10	No estoy seguro/a	Verdadero	Verdadero	Verdadero	Verdadero	Falso	Verdadero	Verdadero	Verdadero	Verdadero	Verdadero	Verdadero	Verdadero	Verdadero	Falso	Verdadero	Verdadero	Falso	Falso	No estoy seguro/a	Verdadero	Falso	Falso	Verdadero
Atuntaqui	Atuntaqui	22	Femenino	UTN	Biotecnología	1-3	No estoy seguro/a	Creado en laboratorio	Una entidad capaz de adaptarse y evolucionar	No estoy seguro/a	Verdadero	Verdadero	Verdadero	Verdadero	No estoy seguro/a	Falso	Verdadero	Falso	Verdadero	Verdadero	Verdadero	Verdadero	Verdadero	Verdadero	No estoy seguro/a	Verdadero	No estoy seguro/a	No estoy seguro/a	No estoy seguro/a	No estoy seguro/a	Verdadero	Falso	Falso	Verdadero	Muy buena información en la encuesta
Quito	Quito	26	Masculino	UCE	Química Farmacéutica	4-6	SARS-COV-2	De origen natural	Una entidad capaz de adaptarse y evolucionar	1 - 10	No estoy seguro/a	Verdadero	Verdadero	Verdadero	Falso	Falso	Verdadero	Falso	Verdadero	Verdadero	Verdadero	Verdadero	Verdadero	Verdadero	No estoy seguro/a	Verdadero	Verdadero	Falso	Falso	No estoy seguro/a	Verdadero	Falso	Falso	Verdadero
Ambato	Ambato	23	Femenino	UTC	Medicina Veterinaria	7-9	COVID-19	Creado en laboratorio	Una entidad capaz de adaptarse y evolucionar	41 - 50	No estoy seguro/a	Verdadero	Verdadero	Verdadero	Falso	Falso	Verdadero	No estoy seguro/a	Verdadero	Verdadero	Verdadero	Verdadero	Verdadero	Verdadero	No estoy seguro/a	Verdadero	Verdadero	Falso	verdadero	Verdadero	Verdadero	Falso	Falso	Verdadero
Cayambe	Cayambe	21	Femenino	UCE	Administración de empresas	4-6	No estoy seguro/a	De origen natural	Una entidad capaz de adaptarse y evolucionar	No estoy seguro/a	Verdadero	Verdadero	Verdadero	Verdadero	Falso	Falso	Verdadero	No estoy seguro/a	Verdadero	Verdadero	Verdadero	Verdadero	Verdadero	Verdadero	No estoy seguro/a	Verdadero	Verdadero	Falso	Falso	No estoy seguro/a	Verdadero	Falso	Falso	Verdadero
Santo Domingo	Santo Domingo	18	Femenino	YACHAY	Biomedicina	1-3	SARS-COV-2	Creado en laboratorio	Una entidad capaz de adaptarse y evolucionar	1 - 10	Verdadero	Verdadero	Verdadero	Verdadero	Falso	Falso	Verdadero	Falso	Verdadero	Verdadero	Verdadero	Verdadero	Verdadero	Verdadero	Falso	No estoy seguro/a	Verdadero	Falso	Falso	No estoy seguro/a	Verdadero	Falso	Falso	Verdadero
Santo Domingo	Santo Domingo	18	Femenino	YACHAY	Biomedicina	1-3	SARS-COV-2	Creado en laboratorio	Una entidad capaz de adaptarse y evolucionar	1 - 10	Verdadero	Verdadero	Verdadero	Verdadero	Falso	Falso	Verdadero	Falso	Verdadero	Verdadero	Verdadero	Verdadero	Verdadero	Verdadero	Falso	No estoy seguro/a	Verdadero	Falso	Falso	No estoy seguro/a	Verdadero	Falso	Falso	Verdadero
Quito	Quito	22	Masculino	UCE	Ing. civil	7-9	SARS-COV-2	No estoy seguro/a	Una entidad capaz de adaptarse y evolucionar	1 - 10	No estoy seguro/a	Verdadero	No estoy seguro/a	Verdadero	Falso	No estoy seguro/a	Verdadero	Verdadero	Verdadero	Verdadero	Verdadero	No estoy seguro/a	Verdadero	Verdadero	No estoy seguro/a	Verdadero	Falso	No estoy seguro/a	Falso	No estoy seguro/a	Verdadero	Falso	Falso	Verdadero
Otavalo	Otavalo	20	Femenino	UTN	Ingeniería en Biotecnología	1-3	COVID-19	De origen natural	Una entidad capaz de adaptarse y evolucionar	31 - 40	Falso	Verdadero	Verdadero	Verdadero	Falso	Falso	Verdadero	Falso	Verdadero	Verdadero	Verdadero	Verdadero	Verdadero	Verdadero	Falso	No estoy seguro/a	Verdadero	Falso	Falso	No estoy seguro/a	Falso	Falso	Falso	Verdadero	La encuesta está bien hecha
Quito	Quito	22	Masculino	UCE	Psicología educativa	7-9	SARS-COV-2	De origen natural	Una entidad capaz de adaptarse y evolucionar	1 - 10	No estoy seguro/a	Verdadero	Verdadero	Verdadero	Falso	Falso	Verdadero	Verdadero	Verdadero	Verdadero	Verdadero	Verdadero	Verdadero	Verdadero	No estoy seguro/a	Verdadero	No estoy seguro/a	Falso	No estoy seguro/a	No estoy seguro/a	Verdadero	Falso	No estoy seguro/a	Verdadero	Identificar cuantas personas creen que esto es un complot
Quito	Quito	20	Masculino	UCE	Biología	1-3	SARS-COV-2	De origen natural	Una entidad capaz de adaptarse y evolucionar	1 - 10	Falso	Verdadero	Verdadero	Verdadero	Falso	Falso	Verdadero	Falso	Verdadero	Verdadero	Verdadero	Verdadero	Verdadero	Verdadero	Falso	Verdadero	Verdadero	Falso	verdadero	Falso	Verdadero	Falso	Falso	Verdadero
Quito	Quito	22	Femenino	UCE	Administración Pública	1-3	SARS-COV-2	No estoy seguro/a	Una entidad capaz de adaptarse y evolucionar	No estoy seguro/a	No estoy seguro/a	Verdadero	Verdadero	Verdadero	Falso	Falso	Verdadero	Falso	Verdadero	Verdadero	Verdadero	Verdadero	Verdadero	Verdadero	No estoy seguro/a	No estoy seguro/a	No estoy seguro/a	No estoy seguro/a	Falso	Falso	Verdadero	Falso	Verdadero	Verdadero
Quito	Quito	27	Femenino	UCE	Filosofia	1-3	SARS-COV-2	No estoy seguro/a	Una entidad capaz de adaptarse y evolucionar	No estoy seguro/a	Verdadero	Verdadero	Verdadero	Verdadero	Falso	Falso	Verdadero	No estoy seguro/a	Verdadero	Verdadero	Verdadero	Verdadero	Verdadero	Verdadero	No estoy seguro/a	Verdadero	Verdadero	No estoy seguro/a	Falso	Falso	Falso	Falso	Falso	Verdadero
Quito	Quito	35	Masculino	UCE	artes	1-3	No estoy seguro/a	No estoy seguro/a	Una entidad capaz de adaptarse y evolucionar	No estoy seguro/a	Verdadero	Verdadero	Verdadero	Verdadero	No estoy seguro/a	Falso	Verdadero	Falso	Verdadero	No estoy seguro/a	Verdadero	Verdadero	No estoy seguro/a	Verdadero	No estoy seguro/a	Verdadero	Verdadero	Falso	Falso	No estoy seguro/a	Verdadero	Falso	Falso	Verdadero	pues algunas preguntas falta precisión en la formulación de ellas como por ejemplo la 1 que me llevaba a doble negación, así que tuve que elegir la opción no estoy seguro. También seria bueno una pregunta sobre si a comprobado la información en red? o comparte cualquier cosa que publican. muchos comparten post sin ni siquiera ver la fuente.
Quito	Quito	20	Femenino	UCE	Estadística	1-3	No estoy seguro/a	Creado en laboratorio	Una entidad capaz de adaptarse y evolucionar	41 - 50	Falso	Verdadero	Verdadero	Verdadero	Verdadero	Falso	Verdadero	Verdadero	Verdadero	Verdadero	Verdadero	Verdadero	Verdadero	Verdadero	No estoy seguro/a	No estoy seguro/a	Verdadero	Falso	No estoy seguro/a	Verdadero	Verdadero	Falso	Falso	Verdadero
Quito	Loja	21	Otro	UCE	Comunicación Social	4-6	COVID-19	Creado en laboratorio	Un compuesto químico	31 - 40	Verdadero	Verdadero	Verdadero	Verdadero	Falso	Falso	Falso	Verdadero	Verdadero	Verdadero	Verdadero	Verdadero	Falso	Verdadero	Falso	No estoy seguro/a	Falso	Falso	Falso	Verdadero	Verdadero	Falso	Falso	Verdadero
El Angel	El Angel	18	Masculino	YACHAY	Tronco comun	1-3	SARS-COV-2	No estoy seguro/a	Una entidad capaz de adaptarse y evolucionar	11 - 20	Verdadero	Verdadero	Verdadero	Verdadero	Falso	Falso	Verdadero	Falso	Verdadero	Verdadero	Verdadero	Verdadero	Verdadero	Verdadero	Falso	No estoy seguro/a	Verdadero	Falso	No estoy seguro/a	No estoy seguro/a	Verdadero	No estoy seguro/a	Falso	Verdadero
QUITO	QUITO	24	Femenino	UCE	PSICOLOGÍA CLÍNICA	9 en adelante	SARS-COV-2	De origen natural	Una entidad capaz de adaptarse y evolucionar	No estoy seguro/a	Verdadero	Verdadero	Verdadero	Verdadero	Falso	Falso	Verdadero	No estoy seguro/a	Verdadero	Verdadero	Verdadero	Verdadero	Verdadero	Verdadero	Falso	No estoy seguro/a	Verdadero	Falso	Falso	Verdadero	Verdadero	Falso	Falso	Verdadero
Quito	Quito	21	Femenino	UCE	Biología	4-6	SARS-COV-2	De origen natural	Una entidad capaz de adaptarse y evolucionar	1 - 10	Verdadero	Verdadero	Verdadero	Verdadero	No estoy seguro/a	Falso	Verdadero	Verdadero	Verdadero	Verdadero	Verdadero	Verdadero	Verdadero	Verdadero	Falso	Verdadero	Verdadero	Falso	Falso	Falso	Verdadero	Falso	Falso	Verdadero
Quito	Quito	25	Femenino	UCE	Psicología Infantil y Psicorrehabilitación	9 en adelante	SARS-COV-2	De origen natural	Una entidad capaz de adaptarse y evolucionar	1 - 10	Verdadero	Verdadero	Verdadero	Verdadero	Verdadero	Falso	Verdadero	Falso	Verdadero	Verdadero	Verdadero	Verdadero	Verdadero	Verdadero	No estoy seguro/a	Falso	No estoy seguro/a	Verdadero	verdadero	Falso	Verdadero	No estoy seguro/a	Verdadero	Verdadero
San Gabriel	San Gabriel	19	Masculino	YACHAY	Matemáticas	1-3	No estoy seguro/a	No estoy seguro/a	No estoy seguro/a	1 - 10	Verdadero	Verdadero	Verdadero	Verdadero	Falso	No estoy seguro/a	No estoy seguro/a	Verdadero	Verdadero	Verdadero	Verdadero	Verdadero	Verdadero	Verdadero	Falso	No estoy seguro/a	Verdadero	Falso	No estoy seguro/a	Verdadero	Verdadero	Falso	Verdadero	Verdadero
Quito	Ecuador	24	Femenino	UCE	Turismo Ecológico	7-9	SARS-COV-2	De origen natural	Una entidad capaz de adaptarse y evolucionar	No estoy seguro/a	Verdadero	Verdadero	Verdadero	Verdadero	Falso	Falso	No estoy seguro/a	Falso	Verdadero	Verdadero	Verdadero	Verdadero	Verdadero	Verdadero	Falso	Verdadero	Verdadero	Falso	Falso	Falso	Falso	Falso	Falso	Verdadero
Quito	Quito	20	Masculino	YACHAY	Quimica	1-3	SARS-COV-2	No estoy seguro/a	Una entidad capaz de adaptarse y evolucionar	11 - 20	Verdadero	Verdadero	Verdadero	Verdadero	Falso	Falso	Verdadero	Verdadero	No estoy seguro/a	Verdadero	Verdadero	Verdadero	Verdadero	Verdadero	Verdadero	Verdadero	Verdadero	Falso	Falso	Falso	No estoy seguro/a	Falso	Falso	Verdadero
Quito	Marcabeli	22	Femenino	UCE	contabilidad y Auditoria	1-3	COVID-19	Creado en laboratorio	Una entidad capaz de adaptarse y evolucionar	31 - 40	Verdadero	Verdadero	Falso	Verdadero	Falso	Verdadero	Verdadero	Falso	Verdadero	Verdadero	Verdadero	Verdadero	Verdadero	Verdadero	Falso	Falso	Verdadero	Falso	Falso	Falso	Verdadero	Falso	Falso	Verdadero
Piñas	Piñas	20	Masculino	YACHAY	Física	1-3	SARS-COV-2	De origen natural	Una entidad capaz de adaptarse y evolucionar	1 - 10	Verdadero	Verdadero	Verdadero	Verdadero	Falso	Falso	Verdadero	Falso	Verdadero	Verdadero	Verdadero	Verdadero	Verdadero	Verdadero	No estoy seguro/a	No estoy seguro/a	No estoy seguro/a	Falso	Falso	Verdadero	Falso	Falso	Falso	Falso	Hagan algo chévere y no genérico.
Quito	Tulcan	19	Femenino	UCE	Química	1-3	SARS-COV-2	Creado en laboratorio	Una entidad capaz de adaptarse y evolucionar	21 - 30	Verdadero	Verdadero	Verdadero	Verdadero	Falso	Falso	Verdadero	Verdadero	Verdadero	Verdadero	Verdadero	Verdadero	Verdadero	Verdadero	Falso	No estoy seguro/a	Verdadero	Falso	Falso	Falso	Falso	Falso	Falso	Verdadero
CALDERON	TABACUNDO	25	Masculino	UCE	INGENIERIA CIVIL	7-9	SARS-COV-2	De origen natural	Una entidad capaz de adaptarse y evolucionar	1 - 10	Verdadero	Verdadero	Verdadero	Verdadero	Falso	Falso	Verdadero	No estoy seguro/a	Verdadero	Falso	Verdadero	Verdadero	No estoy seguro/a	Verdadero	No estoy seguro/a	No estoy seguro/a	Verdadero	Falso	Falso	Verdadero	Verdadero	Falso	Falso	Verdadero
Otavalo	Otavalo	20	Masculino	UTN	Biotecnologia	4-6	SARS-COV-2	Creado en laboratorio	Una entidad capaz de adaptarse y evolucionar	1 - 10	Verdadero	Verdadero	Verdadero	Verdadero	Falso	Falso	Verdadero	Falso	Verdadero	Verdadero	Verdadero	Verdadero	Verdadero	Verdadero	Verdadero	Verdadero	Verdadero	Falso	Falso	Falso	Falso	Falso	Falso	Verdadero
Quito	Quito	28	Femenino	UCE	Educación Inicial	1-3	COVID-19	Creado en laboratorio	Un compuesto químico	1 - 10	Verdadero	Verdadero	Verdadero	Verdadero	Falso	Falso	No estoy seguro/a	Verdadero	Verdadero	Verdadero	Verdadero	Verdadero	No estoy seguro/a	Verdadero	Falso	No estoy seguro/a	Verdadero	Falso	Falso	Verdadero	Verdadero	Falso	Falso	Verdadero
Cayambe	Cayambe	20	Femenino	YACHAY	Petroquimica	1-3	SARS-COV-2	No estoy seguro/a	Una entidad capaz de adaptarse y evolucionar	1 - 10	Verdadero	Verdadero	Verdadero	Verdadero	Falso	Falso	Falso	Falso	Verdadero	Verdadero	Verdadero	Verdadero	Verdadero	Verdadero	Falso	Verdadero	Falso	Falso	Falso	Verdadero	Verdadero	Falso	Falso	Verdadero
QUITO	QUITO	30	Femenino	UCE	DANZA	1-3	SARS-COV-2	No estoy seguro/a	Una entidad capaz de adaptarse y evolucionar	No estoy seguro/a	Falso	Verdadero	Verdadero	Verdadero	No estoy seguro/a	Falso	Verdadero	Falso	Verdadero	Verdadero	Verdadero	Falso	Verdadero	Verdadero	No estoy seguro/a	No estoy seguro/a	Verdadero	Falso	No estoy seguro/a	Verdadero	Falso	Falso	Falso	Verdadero
QUITO	QUITO	26	Femenino	UCE	ESTADISTICA	7-9	SARS-COV-2	No estoy seguro/a	Una entidad capaz de adaptarse y evolucionar	41 - 50	Falso	Verdadero	Verdadero	Verdadero	Falso	Falso	No estoy seguro/a	No estoy seguro/a	Verdadero	Verdadero	Verdadero	Verdadero	Verdadero	Verdadero	Verdadero	Falso	Verdadero	Verdadero	verdadero	Verdadero	Falso	Falso	No estoy seguro/a	Verdadero
Ibarra	Ibarra	19	Femenino	YACHAY	Biología	1-3	SARS-COV-2	No estoy seguro/a	Una entidad capaz de adaptarse y evolucionar	No estoy seguro/a	Verdadero	Verdadero	Verdadero	Verdadero	Falso	Falso	Verdadero	Verdadero	Verdadero	Verdadero	Verdadero	Verdadero	Verdadero	Verdadero	No estoy seguro/a	Verdadero	Verdadero	No estoy seguro/a	Falso	Verdadero	Verdadero	Falso	Falso	Verdadero
Quito	Quito	23	Femenino	UCE	Arquitectura	9 en adelante	SARS-COV-2	De origen natural	Una entidad capaz de adaptarse y evolucionar	No estoy seguro/a	Verdadero	Verdadero	Verdadero	Verdadero	Falso	Falso	Verdadero	Falso	Verdadero	Verdadero	Verdadero	Verdadero	Verdadero	Verdadero	No estoy seguro/a	No estoy seguro/a	Verdadero	Falso	Falso	Verdadero	Falso	Falso	Falso	Verdadero
Quito	Urcuquí	21	Femenino	UCE	Comunicación Social	4-6	SARS-COV-2	De origen natural	No estoy seguro/a	No estoy seguro/a	No estoy seguro/a	Verdadero	No estoy seguro/a	Verdadero	Falso	Falso	Verdadero	Falso	Verdadero	Verdadero	Verdadero	Verdadero	Verdadero	Verdadero	No estoy seguro/a	No estoy seguro/a	Verdadero	Falso	No estoy seguro/a	Verdadero	Verdadero	Falso	Falso	Verdadero	Creo que un gran número de personas contagiadas y que son asintomáticas salen a la calle y puede que contagien a alguien más. Es triste que no todos podamos acceder a las pruebas para saber si fuimos contagiados y así no contagiar a los demás. Es una verdadera utopía asumir que todos algún momento tendremos esa oportunidad de saber si fuimos o no contagiados.
Quito	Quito	19	Femenino	UDLA	Nutri	4-6	SARS-COV-2	De origen natural	Una entidad capaz de adaptarse y evolucionar	11 - 20	Falso	Verdadero	Verdadero	Verdadero	Falso	Falso	Verdadero	Verdadero	Verdadero	Verdadero	Verdadero	Verdadero	Verdadero	Verdadero	Falso	Verdadero	Falso	Falso	verdadero	Falso	Falso	Falso	Falso	Verdadero
Quito	Quito	21	Femenino	UCE	Trabajo Social	1-3	SARS-COV-2	De origen natural	Una entidad capaz de adaptarse y evolucionar	No estoy seguro/a	Falso	Verdadero	Verdadero	Verdadero	Falso	Falso	Verdadero	Falso	Verdadero	Verdadero	Verdadero	Verdadero	Verdadero	Verdadero	Falso	No estoy seguro/a	No estoy seguro/a	Falso	verdadero	Verdadero	Verdadero	verdadero	No estoy seguro/a	Verdadero
Ambato	Ambato	22	Femenino	UTC	Medicina Veterinaria	4-6	SARS-COV-2	No estoy seguro/a	No estoy seguro/a	No estoy seguro/a	Verdadero	Verdadero	Verdadero	Verdadero	Falso	Falso	Verdadero	Falso	Verdadero	Verdadero	Verdadero	Verdadero	Verdadero	Verdadero	No estoy seguro/a	No estoy seguro/a	Verdadero	Verdadero	Falso	No estoy seguro/a	Verdadero	Falso	Falso	Verdadero
Pujili	Latacunga	22	Masculino	UTC	Medicina Veterinaria	4-6	SARS-COV-2	Creado en laboratorio	Un compuesto químico	1 - 10	Verdadero	Verdadero	Verdadero	Verdadero	Verdadero	Falso	Verdadero	No estoy seguro/a	Verdadero	Verdadero	Verdadero	Verdadero	Verdadero	Verdadero	No estoy seguro/a	No estoy seguro/a	No estoy seguro/a	No estoy seguro/a	Falso	Verdadero	Verdadero	Falso	Falso	Verdadero	la unica solucion es el confinamiento, ya que si se cumple una cuarentena total de 3 semanas se puede controlar la ola de contagio como ejemplo tenemos a la Nacion de Gran Bretaña.
Quito	Quito	23	Femenino	Universidad Técnica de Cotopaxi	Medicina Veterinaria	4-6	SARS-COV-2	De origen natural	Una entidad capaz de adaptarse y evolucionar	31 - 40	No estoy seguro/a	Verdadero	Verdadero	Verdadero	No estoy seguro/a	No estoy seguro/a	Verdadero	Verdadero	Verdadero	Verdadero	Verdadero	Verdadero	Verdadero	Verdadero	No estoy seguro/a	No estoy seguro/a	Verdadero	Falso	No estoy seguro/a	Verdadero	Verdadero	No estoy seguro/a	No estoy seguro/a	Verdadero	sin comentario
Quito	Quito	24	Femenino	UTC	Medicina veterinaria	4-6	SARS-COV-2	De origen natural	Una entidad capaz de adaptarse y evolucionar	11 - 20	Verdadero	Verdadero	Verdadero	Verdadero	No estoy seguro/a	Falso	Verdadero	Falso	Verdadero	Verdadero	Verdadero	Verdadero	Verdadero	Verdadero	Falso	Verdadero	Verdadero	Falso	Falso	No estoy seguro/a	Verdadero	Falso	Falso	Verdadero
Machachi	Machachi	21	Masculino	UTC	veterinaria	4-6	SARS-COV-2	Creado en laboratorio	Una entidad capaz de adaptarse y evolucionar	11 - 20	No estoy seguro/a	Verdadero	Verdadero	Verdadero	Falso	Falso	Verdadero	No estoy seguro/a	Falso	Verdadero	Verdadero	Verdadero	Verdadero	Verdadero	No estoy seguro/a	No estoy seguro/a	Verdadero	Falso	No estoy seguro/a	Verdadero	Verdadero	Falso	Falso	Verdadero
Quito	Quito	22	Femenino	UTC	Medicina Veterinaria	4-6	No estoy seguro/a	De origen natural	Una entidad capaz de adaptarse y evolucionar	21 - 30	Falso	Verdadero	Verdadero	Verdadero	Falso	Falso	No estoy seguro/a	No estoy seguro/a	Verdadero	Verdadero	Verdadero	Falso	Verdadero	Verdadero	No estoy seguro/a	No estoy seguro/a	No estoy seguro/a	Falso	verdadero	No estoy seguro/a	Verdadero	Falso	Falso	Verdadero	.
Sangolquí	Sangolquí	21	Femenino	UTC	Medicina Veterinaria	4-6	SARS-COV-2	No estoy seguro/a	Una entidad capaz de adaptarse y evolucionar	No estoy seguro/a	Verdadero	Verdadero	No estoy seguro/a	Verdadero	Falso	Falso	Verdadero	Falso	Verdadero	Verdadero	Verdadero	Verdadero	Verdadero	Verdadero	No estoy seguro/a	No estoy seguro/a	No estoy seguro/a	Falso	Falso	Falso	Verdadero	Falso	Falso	Verdadero
Latacunga	Latacunga	23	Masculino	UTC	Veterinaria	4-6	SARS-COV-2	Creado en laboratorio	Una entidad capaz de adaptarse y evolucionar	1 - 10	Falso	Verdadero	Verdadero	Verdadero	Falso	Falso	Verdadero	Verdadero	Verdadero	Falso	Verdadero	Verdadero	Verdadero	Verdadero	Verdadero	Verdadero	Verdadero	Falso	Falso	Verdadero	Verdadero	Falso	Falso	Verdadero
Latacunga	Latacunga	22	Femenino	UTC	Medicina Veterinaria	4-6	SARS-COV-2	No estoy seguro/a	No estoy seguro/a	No estoy seguro/a	Verdadero	Verdadero	Verdadero	Verdadero	Verdadero	No estoy seguro/a	Verdadero	Falso	Verdadero	Verdadero	Verdadero	Verdadero	Verdadero	Verdadero	No estoy seguro/a	No estoy seguro/a	Verdadero	Falso	Falso	Verdadero	Falso	Falso	Verdadero	Verdadero
Salcedo	Salcedo	25	Femenino	UTC	Medicina Veterinaria	4-6	COVID-19	Creado en laboratorio	Una entidad capaz de adaptarse y evolucionar	1 - 10	No estoy seguro/a	Verdadero	Verdadero	No estoy seguro/a	Falso	Falso	No estoy seguro/a	Falso	Verdadero	Verdadero	Verdadero	Verdadero	Verdadero	Verdadero	Verdadero	Falso	Verdadero	No estoy seguro/a	Falso	No estoy seguro/a	Verdadero	Falso	No estoy seguro/a	Verdadero	En mi opinión está encuesta es muy factible para entender que tan informada está la población acerca del coronavirus y de ahí tomar ciertas soluciones del mismo.
Cayambe	Cayambe	22	Femenino	UTC	Medicina Veterinaria y Zootecnia	4-6	SARS-COV-2	Creado en laboratorio	Una entidad capaz de adaptarse y evolucionar	1 - 10	Falso	Verdadero	Verdadero	Verdadero	Falso	Falso	Verdadero	Falso	Verdadero	Verdadero	Verdadero	Verdadero	Verdadero	Verdadero	No estoy seguro/a	No estoy seguro/a	Verdadero	Falso	Falso	No estoy seguro/a	Verdadero	Falso	Falso	Verdadero
Latacunga	Latacunga	22	Masculino	UTC	Veterinaria	4-6	SARS-COV-2	Creado en laboratorio	Una entidad capaz de adaptarse y evolucionar	21 - 30	Verdadero	Verdadero	Verdadero	Verdadero	Falso	Falso	Verdadero	Falso	Verdadero	Verdadero	Verdadero	Verdadero	Verdadero	Verdadero	Verdadero	Verdadero	Verdadero	Falso	Falso	No estoy seguro/a	Verdadero	Falso	Falso	Verdadero	Podría haber preguntas sobre cuáles son los métodos de desinfección que cree conveniente realizar una persona ante el covid 19.
Quito	Quito	39	Femenino	UTC	MVZ	4-6	SARS-COV-2	No estoy seguro/a	Una entidad capaz de adaptarse y evolucionar	1 - 10	Verdadero	Verdadero	Verdadero	Verdadero	Falso	Falso	Verdadero	Falso	Verdadero	Verdadero	Verdadero	Verdadero	Verdadero	Verdadero	No estoy seguro/a	No estoy seguro/a	Verdadero	Falso	No estoy seguro/a	Verdadero	Falso	Falso	Falso	Verdadero
Santo Domingo	Quito	22	Femenino	UTC	medicina veterinaria y zootecnia	4-6	SARS-COV-2	No estoy seguro/a	Una entidad capaz de adaptarse y evolucionar	41 - 50	Verdadero	Verdadero	Verdadero	Verdadero	Falso	Falso	Verdadero	Falso	Verdadero	Verdadero	Verdadero	Verdadero	Verdadero	Verdadero	Falso	Verdadero	Verdadero	Falso	Falso	Falso	Falso	Falso	Falso	Verdadero	Las preguntas deberían ser mas abiertas y con items de dar otra opción ya que hay preguntas que a meritan ser respondidas de mejor manera para que ustedes como encuestadores tengan mejores datos
Uyumbicho	Quito	22	Femenino	UTC	Medicina Veterinaria	4-6	SARS-COV-2	No estoy seguro/a	Una entidad capaz de adaptarse y evolucionar	21 - 30	Verdadero	Verdadero	Verdadero	Verdadero	No estoy seguro/a	Falso	Verdadero	Verdadero	Verdadero	Falso	Verdadero	Verdadero	Verdadero	Verdadero	Falso	No estoy seguro/a	Falso	Falso	Falso	Verdadero	Verdadero	Falso	Falso	Verdadero	Podrían incluir unas preguntas más sobre que medidas debemos tomar para no contagiarse o en el lugar dónde vivimos si las personas usan mascarilla o hacen algo al respecto para evitar contagiarse
Pujilí	Latacunga	21	Femenino	UTC	Medicina Veterinaria	4-6	COVID-19	De origen natural	No estoy seguro/a	51 - 100	Falso	Verdadero	Verdadero	Verdadero	Falso	Falso	Verdadero	Falso	Verdadero	Verdadero	Verdadero	Verdadero	Verdadero	Verdadero	No estoy seguro/a	No estoy seguro/a	No estoy seguro/a	Verdadero	No estoy seguro/a	No estoy seguro/a	Verdadero	Falso	No estoy seguro/a	Verdadero
Saquisili	Saquisili	33	Masculino	UTC	Medicina veterinaria	4-6	SARS-COV-2	No estoy seguro/a	No estoy seguro/a	No estoy seguro/a	Falso	Verdadero	Verdadero	Verdadero	No estoy seguro/a	Falso	Verdadero	Verdadero	Verdadero	Verdadero	Verdadero	Verdadero	Verdadero	Verdadero	No estoy seguro/a	Verdadero	Verdadero	Falso	Falso	No estoy seguro/a	Verdadero	Falso	Falso	Verdadero
Ambato	Ambato	25	Femenino	UTC	Medicina Veterinaria	4-6	COVID-19	No estoy seguro/a	Una entidad capaz de adaptarse y evolucionar	No estoy seguro/a	No estoy seguro/a	Verdadero	Verdadero	Verdadero	Falso	Falso	No estoy seguro/a	No estoy seguro/a	Verdadero	Verdadero	Verdadero	Verdadero	Verdadero	Verdadero	No estoy seguro/a	Falso	Verdadero	Falso	Falso	No estoy seguro/a	Falso	Falso	No estoy seguro/a	Verdadero
Latacunga	Latacunga	24	Masculino	UTC	Medicina Veterinaria	4-6	SARS-COV-2	Creado en laboratorio	Una entidad capaz de adaptarse y evolucionar	1 - 10	Falso	Verdadero	Verdadero	Verdadero	Falso	Falso	Verdadero	Verdadero	Verdadero	Verdadero	Verdadero	Verdadero	Verdadero	Verdadero	Falso	Verdadero	Verdadero	Falso	Falso	Falso	Verdadero	Falso	Falso	Verdadero	Los resultados obtenidos puedan ser socializados con la comunidad universitaria.
Latacunga	Latacunga	26	Masculino	UTC	Medicina Veterinaria	4-6	COVID-19	Creado en laboratorio	Una entidad capaz de adaptarse y evolucionar	1 - 10	Falso	Verdadero	Verdadero	Verdadero	Falso	Falso	Verdadero	No estoy seguro/a	Verdadero	Verdadero	Verdadero	Verdadero	Verdadero	Verdadero	No estoy seguro/a	No estoy seguro/a	No estoy seguro/a	No estoy seguro/a	No estoy seguro/a	Verdadero	Falso	Falso	No estoy seguro/a	Verdadero	el covid 19 es una enfermedad muy contagiosa por el cual se les pide a las demás personas que se cuiden.
Latacunga	Latacunga	23	Masculino	UTC	Medicina Veterinaria	4-6	SARS-COV-2	De origen natural	Una entidad capaz de adaptarse y evolucionar	51 - 100	No estoy seguro/a	Verdadero	No estoy seguro/a	Verdadero	Falso	Falso	Falso	Falso	Verdadero	Verdadero	Verdadero	No estoy seguro/a	Verdadero	Verdadero	Verdadero	Verdadero	No estoy seguro/a	No estoy seguro/a	verdadero	No estoy seguro/a	Falso	No estoy seguro/a	Falso	Verdadero	Me parece muy bien que se realicen este tipo de encuesta para ver cuanto sabemos sobre esta pandemia por la que estamos pasando.
Aloag	Quito	25	Femenino	UTC	Medicina Veterinaria	4-6	SARS-COV-2	De origen natural	Una entidad capaz de adaptarse y evolucionar	11 - 20	No estoy seguro/a	Verdadero	Verdadero	Verdadero	Falso	Falso	Verdadero	Falso	Verdadero	Verdadero	Verdadero	Verdadero	Verdadero	Verdadero	Falso	Verdadero	Verdadero	Falso	Falso	No estoy seguro/a	Verdadero	Falso	Falso	Verdadero	Se podría proyectar el valor estadístico de contagio y poder tomar medidas necesarias para reducir la curva de contagio.
Quito	Quito	22	Masculino	UTC	Medicina Veterinaria	4-6	SARS-COV-2	Creado en laboratorio	Una entidad capaz de adaptarse y evolucionar	1 - 10	No estoy seguro/a	No estoy seguro/a	Verdadero	Verdadero	Falso	Falso	No estoy seguro/a	Verdadero	Verdadero	Verdadero	Verdadero	Verdadero	Verdadero	Verdadero	Falso	No estoy seguro/a	No estoy seguro/a	No estoy seguro/a	Falso	No estoy seguro/a	Verdadero	No estoy seguro/a	Falso	Falso	Debemos mantener la distancia y en caso de ser portadores del virus aislarnos voluntariamente para no contagiar y expandir mas el virus
SALCEDO	SANTO DOMINGO	22	Femenino	UTC	MEDICINA VETERINARIA	4-6	SARS-COV-2	Creado en laboratorio	Una entidad capaz de adaptarse y evolucionar	31 - 40	Falso	Verdadero	Verdadero	Falso	Falso	Falso	Verdadero	Falso	Verdadero	Verdadero	Verdadero	Verdadero	Verdadero	Verdadero	Falso	Verdadero	Falso	Falso	Falso	Verdadero	Verdadero	Falso	Falso	No estoy seguro/a	ME PARECE MUY BIEN ESTA ESNCUESTA
Ambato	Ambato	25	Masculino	UTC	Medicina Veterinaria	4-6	SARS-COV-2	De origen natural	Una entidad capaz de adaptarse y evolucionar	21 - 30	Verdadero	Verdadero	Verdadero	Verdadero	Falso	Falso	Verdadero	Falso	Verdadero	Verdadero	Verdadero	Verdadero	Verdadero	Verdadero	Falso	Verdadero	Verdadero	Falso	Falso	Falso	Verdadero	Falso	Falso	Verdadero
Latacunga	Latacunga	23	Masculino	UTC	Medicina Veterinaria	4-6	No estoy seguro/a	No estoy seguro/a	No estoy seguro/a	31 - 40	Falso	Verdadero	Verdadero	Verdadero	Falso	Falso	Verdadero	Falso	Verdadero	Verdadero	Verdadero	Verdadero	Verdadero	Verdadero	Falso	No estoy seguro/a	Verdadero	Verdadero	Falso	Falso	Verdadero	Falso	Falso	Verdadero	Excelente la encuentra me informo mas sobre este tema.
Puyo	Puyo	21	Femenino	UTC	Medicina Veterinaria	4-6	COVID-19	Creado en laboratorio	No estoy seguro/a	21 - 30	No estoy seguro/a	Verdadero	No estoy seguro/a	Verdadero	No estoy seguro/a	Falso	Verdadero	Verdadero	No estoy seguro/a	Verdadero	Verdadero	Verdadero	Falso	Verdadero	No estoy seguro/a	No estoy seguro/a	Verdadero	Falso	Falso	Verdadero	Falso	No estoy seguro/a	Falso	Verdadero
Cayambe	Quito	22	Femenino	UTC	Medicina Veterinaria	4-6	SARS-COV-2	Creado en laboratorio	Una entidad capaz de adaptarse y evolucionar	41 - 50	Falso	Verdadero	Verdadero	Verdadero	Falso	Falso	Verdadero	No estoy seguro/a	Verdadero	Verdadero	Verdadero	Verdadero	Verdadero	Verdadero	No estoy seguro/a	No estoy seguro/a	Verdadero	Falso	Falso	No estoy seguro/a	Verdadero	Falso	Falso	Verdadero
Machachi	Latacunga	22	Femenino	UTC	Medicina veterinaria	4-6	SARS-COV-2	Creado en laboratorio	Una entidad capaz de adaptarse y evolucionar	No estoy seguro/a	Verdadero	Verdadero	Verdadero	Verdadero	No estoy seguro/a	Falso	Verdadero	Verdadero	No estoy seguro/a	Verdadero	Verdadero	Verdadero	Verdadero	Verdadero	Verdadero	Falso	Verdadero	Falso	Falso	Verdadero	Verdadero	Falso	No estoy seguro/a	Verdadero
Urcuquí	Ibarra	19	Masculino	YACHAY	Física	1-3	COVID-19	De origen natural	Una entidad capaz de adaptarse y evolucionar	No estoy seguro/a	No estoy seguro/a	Verdadero	Verdadero	Verdadero	Verdadero	No estoy seguro/a	Verdadero	Falso	Verdadero	Verdadero	Verdadero	Verdadero	Verdadero	Verdadero	No estoy seguro/a	No estoy seguro/a	Verdadero	Falso	No estoy seguro/a	No estoy seguro/a	Falso	Falso	Falso	Verdadero
Cayambe	Cayambe	20	Femenino	UCE	Agronomia	1-3	COVID-19	Creado en laboratorio	Una entidad capaz de adaptarse y evolucionar	11 - 20	Falso	Verdadero	Verdadero	Verdadero	Falso	Falso	Verdadero	Falso	Verdadero	Verdadero	Verdadero	Verdadero	Verdadero	Verdadero	No estoy seguro/a	Verdadero	Verdadero	Falso	No estoy seguro/a	Verdadero	Falso	Falso	Falso	Verdadero
Machachi	Machachi	45	Femenino	UCE	Filosofía	1-3	SARS-COV-2	De origen natural	Una entidad capaz de adaptarse y evolucionar	No estoy seguro/a	No estoy seguro/a	Verdadero	Verdadero	Verdadero	Falso	Falso	Verdadero	No estoy seguro/a	Verdadero	Verdadero	Verdadero	Verdadero	Verdadero	Verdadero	Falso	No estoy seguro/a	Verdadero	Falso	Falso	Verdadero	No estoy seguro/a	Falso	Falso	Verdadero
Guaranda	Guaranda	18	Femenino	UCE	Bioquímica y Farmacia	1-3	SARS-COV-2	De origen natural	Una entidad capaz de adaptarse y evolucionar	No estoy seguro/a	Verdadero	Verdadero	Verdadero	Verdadero	Falso	Falso	Verdadero	Falso	Verdadero	Verdadero	Verdadero	Verdadero	Verdadero	Verdadero	Falso	Verdadero	Falso	Falso	Falso	Falso	Verdadero	Falso	Falso	Verdadero
Quito	Quito	38	Masculino	Graduado uce	Ciencias de la educación	9 en adelante	SARS-COV-2	De origen natural	Una entidad capaz de adaptarse y evolucionar	11 - 20	Verdadero	Verdadero	Verdadero	Verdadero	Falso	Falso	Verdadero	Verdadero	Verdadero	Verdadero	Verdadero	Verdadero	Verdadero	Verdadero	Falso	Verdadero	Verdadero	Falso	Falso	Falso	Verdadero	Falso	Falso	Verdadero
Quito	Quito	21	Masculino	UCE	Estadistica	1-3	SARS-COV-2	Creado en laboratorio	Una entidad capaz de adaptarse y evolucionar	No estoy seguro/a	Falso	Verdadero	Verdadero	Verdadero	No estoy seguro/a	Falso	No estoy seguro/a	No estoy seguro/a	Verdadero	Verdadero	Verdadero	Verdadero	Verdadero	Verdadero	No estoy seguro/a	No estoy seguro/a	Verdadero	Verdadero	Falso	Verdadero	No estoy seguro/a	Falso	Falso	Verdadero
ambato	ambato	26	Femenino	UCE	geologia	7-9	SARS-COV-2	De origen natural	No estoy seguro/a	No estoy seguro/a	Verdadero	Verdadero	Verdadero	Verdadero	Verdadero	Falso	Verdadero	Falso	Verdadero	Verdadero	Verdadero	Verdadero	Verdadero	Falso	No estoy seguro/a	No estoy seguro/a	Verdadero	Falso	Falso	Verdadero	No estoy seguro/a	Falso	Falso	Verdadero
Tabacundo	Ibarra	24	Masculino	UCE	Química Farmacéutica	9 en adelante	SARS-COV-2	De origen natural	Una entidad capaz de adaptarse y evolucionar	1 - 10	Verdadero	Verdadero	Verdadero	Verdadero	Falso	Falso	Verdadero	Falso	Verdadero	Verdadero	Verdadero	Verdadero	Verdadero	Verdadero	Falso	Verdadero	Verdadero	Falso	Falso	Verdadero	Verdadero	Falso	Falso	Verdadero
Quito	Quito	19	Femenino	UCE	Obstetricia	1-3	SARS-COV-2	De origen natural	Una entidad capaz de adaptarse y evolucionar	1 - 10	Verdadero	Verdadero	Verdadero	Verdadero	Falso	Falso	Verdadero	Falso	Verdadero	Verdadero	Verdadero	Verdadero	Verdadero	Verdadero	Falso	Verdadero	Verdadero	Falso	Falso	Verdadero	Verdadero	Falso	Falso	Verdadero
Quito	Ambato	55	Masculino	UCE	Derecho	9 en adelante	COVID-19	De origen natural	Una entidad capaz de adaptarse y evolucionar	1 - 10	Verdadero	Verdadero	Verdadero	Verdadero	Falso	Falso	Verdadero	Verdadero	Verdadero	Verdadero	Verdadero	Verdadero	Verdadero	Verdadero	Falso	Verdadero	Verdadero	Falso	Falso	Verdadero	Falso	Falso	Falso	Verdadero	Muy interesante está prueba
Quito	Quito	25	Femenino	UCE	Finanzas	7-9	SARS-COV-2	De origen natural	No estoy seguro/a	1 - 10	Falso	Verdadero	Verdadero	Verdadero	Falso	Falso	Verdadero	No estoy seguro/a	Verdadero	Verdadero	Verdadero	Verdadero	Verdadero	Verdadero	No estoy seguro/a	No estoy seguro/a	Verdadero	Falso	Falso	Falso	Verdadero	Falso	Falso	Verdadero
Quito	Ibarra	21	Femenino	UCE	Turismo	4-6	SARS-COV-2	De origen natural	Una entidad capaz de adaptarse y evolucionar	1 - 10	Verdadero	Verdadero	Verdadero	Verdadero	Falso	Falso	Verdadero	Falso	Verdadero	Verdadero	Verdadero	Falso	Verdadero	Verdadero	Falso	No estoy seguro/a	Falso	Falso	Falso	No estoy seguro/a	Falso	Falso	Falso	Verdadero	Gracias por realizar estas encuesta, es necesario estar informados en tiempos de crisis.
Quito	Quito	27	Femenino	UCE	Enfermeria	1-3	SARS-COV-2	De origen natural	Una entidad capaz de adaptarse y evolucionar	No estoy seguro/a	Falso	Verdadero	Verdadero	Verdadero	Falso	Falso	Verdadero	Falso	Verdadero	Verdadero	Verdadero	Verdadero	Verdadero	Verdadero	Verdadero	Verdadero	Verdadero	Verdadero	No estoy seguro/a	Verdadero	Verdadero	Falso	Falso	Verdadero
Quito	Otavalo	20	Femenino	UCE	Medicina	4-6	SARS-COV-2	De origen natural	Una entidad capaz de adaptarse y evolucionar	1 - 10	Verdadero	Verdadero	Verdadero	Verdadero	Falso	Falso	Verdadero	Falso	Falso	Verdadero	Verdadero	Verdadero	Verdadero	Verdadero	Falso	Verdadero	Verdadero	Falso	Falso	Verdadero	Verdadero	verdadero	Falso	Verdadero	Excelentes preguntas con respuestas muy precisas. LO QUE SI QUISIERA ES QUE COMO UNIVERSIDAD INFORMEN MAS ACERCA DEL DIOXIDO DE CLORO, ya que se sabe que no es recomendable tomarlo, pero al momento de refutar esto a la gente, no hay mucha información del tema y explicar como actúa fisiológicamente en el organismo y que provoca.
Quito	Quito	42	Femenino	UCE	Contabilidad y auditoria	1-3	No estoy seguro/a	No estoy seguro/a	Una entidad capaz de adaptarse y evolucionar	1 - 10	Verdadero	Verdadero	Verdadero	Verdadero	Falso	Falso	Verdadero	Verdadero	Verdadero	Verdadero	Verdadero	Verdadero	Verdadero	Verdadero	No estoy seguro/a	No estoy seguro/a	Verdadero	Falso	No estoy seguro/a	Verdadero	Verdadero	Falso	Falso	Verdadero	Algunas preguntas fueron dirigidas como a un especialista medico, por eso no estaba muy segura pero estuvo bien, me gustaría saber si contesté correctamente el cuestionario. Gracias
Quito	Tulcán	26	Femenino	UCE	Química Farmaceutica	9 en adelante	COVID-19	Creado en laboratorio	Una entidad capaz de adaptarse y evolucionar	No estoy seguro/a	Falso	Verdadero	Verdadero	Verdadero	Falso	Falso	Verdadero	Falso	Verdadero	Verdadero	Falso	Verdadero	No estoy seguro/a	Verdadero	Falso	Verdadero	Verdadero	Falso	Falso	Verdadero	Verdadero	verdadero	Falso	Verdadero
Tabacundo	Quito	31	Masculino	UCE	Jurisprudencia	9 en adelante	SARS-COV-2	De origen natural	Una entidad capaz de adaptarse y evolucionar	1 - 10	Verdadero	Verdadero	Verdadero	Verdadero	Falso	Falso	Verdadero	No estoy seguro/a	Verdadero	Verdadero	Verdadero	Verdadero	Verdadero	Verdadero	No estoy seguro/a	Verdadero	Verdadero	Falso	Falso	Verdadero	Verdadero	Falso	Falso	Verdadero
Quito	Quito	43	Masculino	Superior Tecnológico Central Técnico	Tecnología electrónica	1-3	SARS-COV-2	Creado en laboratorio	Una entidad capaz de adaptarse y evolucionar	1 - 10	Verdadero	Verdadero	Verdadero	Verdadero	No estoy seguro/a	Falso	Verdadero	Falso	No estoy seguro/a	Verdadero	Verdadero	Verdadero	Verdadero	Verdadero	No estoy seguro/a	No estoy seguro/a	Verdadero	Falso	Falso	No estoy seguro/a	Verdadero	verdadero	Falso	Verdadero
Quito	Quito	23	Femenino	UCE	Terapia del lenguaje	7-9	SARS-COV-2	Creado en laboratorio	Una entidad capaz de adaptarse y evolucionar	No estoy seguro/a	Verdadero	Verdadero	Verdadero	Verdadero	Falso	Falso	Verdadero	No estoy seguro/a	Verdadero	Verdadero	Verdadero	Verdadero	Verdadero	Verdadero	No estoy seguro/a	Verdadero	Verdadero	Falso	Falso	Falso	Verdadero	Falso	Falso	Verdadero
Ibarra	Quito	28	Masculino	UCE	Odontologia	7-9	SARS-COV-2	Creado en laboratorio	Un complot mediático	No estoy seguro/a	No estoy seguro/a	Verdadero	Verdadero	Verdadero	Falso	No estoy seguro/a	Verdadero	No estoy seguro/a	Verdadero	Verdadero	Verdadero	Verdadero	Verdadero	Verdadero	No estoy seguro/a	Verdadero	Verdadero	Falso	Falso	No estoy seguro/a	Verdadero	No estoy seguro/a	Falso	No estoy seguro/a
Quito	Quito	22	Femenino	UCE	LABORATORIO CLÍNICO E HISTOTECNOLÓGICO	4-6	SARS-COV-2	De origen natural	Una entidad capaz de adaptarse y evolucionar	51 - 100	Falso	Verdadero	Verdadero	Verdadero	Falso	Falso	Verdadero	Verdadero	Verdadero	Verdadero	Verdadero	Verdadero	Verdadero	Verdadero	Falso	Falso	Verdadero	Falso	Falso	Falso	Falso	No estoy seguro/a	Falso	Verdadero
Quito	Quito	23	Femenino	UCE	Finanzas	4-6	No estoy seguro/a	Creado en laboratorio	Una entidad capaz de adaptarse y evolucionar	21 - 30	Falso	Falso	Verdadero	Verdadero	Falso	Falso	No estoy seguro/a	No estoy seguro/a	No estoy seguro/a	Verdadero	No estoy seguro/a	Verdadero	Verdadero	Verdadero	No estoy seguro/a	No estoy seguro/a	Verdadero	Falso	No estoy seguro/a	Verdadero	Verdadero	Falso	No estoy seguro/a	Verdadero
Quito	Latacunga	25	Masculino	UCE	Cultura Física	7-9	SARS-COV-2	Creado en laboratorio	Una entidad capaz de adaptarse y evolucionar	No estoy seguro/a	No estoy seguro/a	Verdadero	Verdadero	Verdadero	Falso	Falso	Verdadero	No estoy seguro/a	Verdadero	Verdadero	Verdadero	Verdadero	Verdadero	Verdadero	Falso	No estoy seguro/a	Verdadero	Falso	No estoy seguro/a	Verdadero	Falso	Falso	Falso	Verdadero	S/N
Riobamba	Riobamba	30	Femenino	UCE	Derecho	1-3	COVID-19	De origen natural	Una entidad capaz de adaptarse y evolucionar	41 - 50	No estoy seguro/a	Verdadero	Verdadero	Verdadero	Falso	Falso	Verdadero	Verdadero	Verdadero	Verdadero	Verdadero	Verdadero	Verdadero	Verdadero	No estoy seguro/a	No estoy seguro/a	Verdadero	Falso	Falso	Falso	Verdadero	Falso	Falso	Verdadero
Quito	Quito	28	Masculino	UCE	Bioquímica Clínica	9 en adelante	SARS-COV-2	De origen natural	Una entidad capaz de adaptarse y evolucionar	1 - 10	No estoy seguro/a	Verdadero	Verdadero	Verdadero	Falso	Falso	Verdadero	Falso	Verdadero	Verdadero	Verdadero	Verdadero	Verdadero	Verdadero	Falso	Verdadero	Verdadero	Falso	Falso	Verdadero	Verdadero	Falso	Falso	Verdadero
Quito	Quito	20	Femenino	UCE	Trabajo Social	4-6	SARS-COV-2	Creado en laboratorio	Una entidad capaz de adaptarse y evolucionar	51 - 100	Falso	Verdadero	No estoy seguro/a	Verdadero	Falso	Falso	Verdadero	Verdadero	Verdadero	Falso	Verdadero	Verdadero	Verdadero	Verdadero	Verdadero	Verdadero	Verdadero	Falso	No estoy seguro/a	Verdadero	Verdadero	Falso	Falso	Verdadero
Quito	Quito	24	Masculino	UCE	Ingeniería Agronómica	7-9	SARS-COV-2	De origen natural	Una entidad capaz de adaptarse y evolucionar	1 - 10	Verdadero	Verdadero	Verdadero	Verdadero	Falso	Falso	Verdadero	Verdadero	No estoy seguro/a	Verdadero	Verdadero	Verdadero	Verdadero	Verdadero	Falso	Verdadero	Verdadero	Falso	Falso	No estoy seguro/a	No estoy seguro/a	Falso	Falso	Verdadero
Tabacundo	Tabacundo	24	Masculino	UTN	Lic. Diseño Gráfico	7-9	SARS-COV-2	Creado en laboratorio	No estoy seguro/a	No estoy seguro/a	No estoy seguro/a	Verdadero	No estoy seguro/a	Verdadero	No estoy seguro/a	Falso	Verdadero	Falso	Verdadero	Verdadero	Verdadero	Verdadero	Verdadero	Verdadero	Falso	No estoy seguro/a	Verdadero	Falso	Falso	No estoy seguro/a	No estoy seguro/a	Falso	Falso	No estoy seguro/a
Quito	Quito	21	Masculino	UCE	Enfermería	1-3	SARS-COV-2	De origen natural	Una entidad capaz de adaptarse y evolucionar	1 - 10	Verdadero	Verdadero	Verdadero	Verdadero	Falso	Falso	Verdadero	Falso	Verdadero	Falso	Verdadero	Verdadero	Verdadero	Verdadero	Falso	Falso	Verdadero	Falso	Falso	No estoy seguro/a	Verdadero	Falso	Falso	Verdadero
Quito	Quito	23	Femenino	UCE	Terapia del lenguaje	7-9	SARS-COV-2	Creado en laboratorio	Una entidad capaz de adaptarse y evolucionar	1 - 10	Falso	Verdadero	Verdadero	Verdadero	Falso	Falso	Verdadero	Falso	Verdadero	Verdadero	Verdadero	Verdadero	Verdadero	Verdadero	Falso	Falso	Verdadero	Falso	Falso	Verdadero	Verdadero	Falso	Falso	Verdadero
Quito	Quito	24	Masculino	UCE	Administracion de Empresas	7-9	SARS-COV-2	Creado en laboratorio	Una entidad capaz de adaptarse y evolucionar	1 - 10	No estoy seguro/a	Verdadero	Verdadero	Verdadero	Falso	Falso	Verdadero	Verdadero	Verdadero	Verdadero	Verdadero	Verdadero	Verdadero	Verdadero	No estoy seguro/a	No estoy seguro/a	Falso	Falso	Falso	No estoy seguro/a	Verdadero	Falso	Falso	Verdadero
Quito	Atuntaqui	22	Femenino	UCE	Ciencias Políticas	4-6	SARS-COV-2	De origen natural	Una entidad capaz de adaptarse y evolucionar	1 - 10	Falso	Verdadero	Verdadero	Verdadero	Falso	Falso	Verdadero	Falso	Verdadero	Verdadero	Verdadero	Verdadero	Verdadero	Verdadero	No estoy seguro/a	No estoy seguro/a	Verdadero	Falso	Falso	Falso	Falso	Falso	Falso	Verdadero
Quito	Quito	21	Femenino	UCE	Psicología	4-6	SARS-COV-2	No estoy seguro/a	Una entidad capaz de adaptarse y evolucionar	11 - 20	Verdadero	Verdadero	Verdadero	Verdadero	No estoy seguro/a	Falso	Verdadero	Verdadero	No estoy seguro/a	Verdadero	Verdadero	Verdadero	Verdadero	Verdadero	Falso	Verdadero	Verdadero	Falso	Falso	Verdadero	Verdadero	Falso	Falso	Verdadero
Quito	Quito	21	Femenino	UCE	Medicina	4-6	SARS-COV-2	De origen natural	Una entidad capaz de adaptarse y evolucionar	11 - 20	Verdadero	Verdadero	Verdadero	Verdadero	Falso	Falso	Verdadero	Falso	Verdadero	Verdadero	Verdadero	Verdadero	Verdadero	Verdadero	Falso	Verdadero	Verdadero	Falso	Falso	Falso	Verdadero	Falso	Falso	Verdadero
Quito	Quito	27	Femenino	UCE	Biología	7-9	SARS-COV-2	De origen natural	Una entidad capaz de adaptarse y evolucionar	21 - 30	Verdadero	Verdadero	Verdadero	Verdadero	Falso	Falso	Verdadero	Falso	Verdadero	Verdadero	Verdadero	Verdadero	Verdadero	Verdadero	Falso	Verdadero	Verdadero	Falso	Falso	Falso	Verdadero	Falso	Falso	Verdadero
Santo Domingo	Santo Domingo de los Tsáchilas	21	Masculino	UCE	Ingeniería civil	1-3	SARS-COV-2	De origen natural	Un compuesto químico	31 - 40	Falso	Verdadero	Verdadero	Verdadero	Falso	Falso	Verdadero	Verdadero	Verdadero	Verdadero	Verdadero	Verdadero	Verdadero	Verdadero	Falso	Falso	Falso	Falso	Falso	Falso	Falso	Falso	Falso	Verdadero
Quito	Quito	24	Masculino	UCE	Contabilidad y auditoria	9 en adelante	SARS-COV-2	De origen natural	Una entidad capaz de adaptarse y evolucionar	1 - 10	No estoy seguro/a	Verdadero	Verdadero	Verdadero	Falso	Falso	Verdadero	Falso	Verdadero	Verdadero	Verdadero	Verdadero	Verdadero	Verdadero	Falso	Falso	Verdadero	Falso	No estoy seguro/a	Falso	Verdadero	Falso	Falso	Verdadero	Buen aporte
Quito	Quito	18	Masculino	UCE	Administracion Publica	1-3	SARS-COV-2	Creado en laboratorio	Un compuesto químico	No estoy seguro/a	No estoy seguro/a	Verdadero	Verdadero	Verdadero	Falso	Falso	No estoy seguro/a	Falso	Verdadero	Verdadero	Verdadero	Verdadero	Verdadero	Verdadero	Verdadero	Verdadero	Verdadero	Verdadero	verdadero	No estoy seguro/a	Verdadero	Falso	Falso	Verdadero
Latacunga	Latacunga	27	Masculino	UTC	Veterinaria	4-6	SARS-COV-2	De origen natural	Una entidad capaz de adaptarse y evolucionar	11 - 20	Verdadero	Verdadero	Verdadero	Verdadero	Verdadero	Falso	No estoy seguro/a	Verdadero	Verdadero	Verdadero	Verdadero	Verdadero	Verdadero	Verdadero	Verdadero	Verdadero	Verdadero	Verdadero	verdadero	No estoy seguro/a	No estoy seguro/a	Falso	Verdadero	Verdadero	Todo está muy bien la encuentra
Tena	Tena	20	Masculino	UCE	Derecho	4-6	MERS-19	Creado en laboratorio	No estoy seguro/a	11 - 20	No estoy seguro/a	Verdadero	Verdadero	Verdadero	Falso	Falso	Verdadero	No estoy seguro/a	No estoy seguro/a	Verdadero	Verdadero	Verdadero	Verdadero	Verdadero	No estoy seguro/a	No estoy seguro/a	Verdadero	Falso	No estoy seguro/a	Verdadero	No estoy seguro/a	Falso	Falso	Verdadero	E
Sangolquí	Sangolquí	18	Femenino	Ninguna	Psicología	1-3	SARS-COV-2	De origen natural	Una entidad capaz de adaptarse y evolucionar	1 - 10	Verdadero	Verdadero	Verdadero	Verdadero	No estoy seguro/a	Falso	Verdadero	Verdadero	Verdadero	Verdadero	Verdadero	Verdadero	Verdadero	Verdadero	No estoy seguro/a	Falso	Verdadero	Falso	Falso	Falso	Verdadero	Falso	Falso	Verdadero
Quito	Quito	24	Femenino	UCE	Química de Alimentos	4-6	SARS-COV-2	Creado en laboratorio	Una entidad capaz de adaptarse y evolucionar	No estoy seguro/a	No estoy seguro/a	Verdadero	No estoy seguro/a	Verdadero	Falso	Falso	Verdadero	No estoy seguro/a	Verdadero	Verdadero	Verdadero	Verdadero	Verdadero	Verdadero	Falso	Verdadero	Verdadero	Falso	Falso	Falso	Falso	Falso	Falso	Verdadero	Podrían hacernos conocer las respuestas
Quitó	Quito	22	Femenino	UCE	Pedagogía en las Ciencias Experimentales de la Informática	4-6	COVID-19	Creado en laboratorio	Una entidad capaz de adaptarse y evolucionar	No estoy seguro/a	Verdadero	Verdadero	Verdadero	Verdadero	Falso	Falso	Verdadero	Verdadero	Verdadero	Verdadero	Verdadero	Falso	Verdadero	Verdadero	No estoy seguro/a	No estoy seguro/a	Verdadero	Falso	No estoy seguro/a	No estoy seguro/a	Verdadero	Falso	Falso	Verdadero
Quito	Quito	21	Femenino	UTC	Veterinaria	4-6	COVID-19	No estoy seguro/a	Una entidad capaz de adaptarse y evolucionar	No estoy seguro/a	No estoy seguro/a	No estoy seguro/a	Verdadero	Verdadero	Falso	Falso	Verdadero	Verdadero	Verdadero	Verdadero	Verdadero	Verdadero	Verdadero	Verdadero	No estoy seguro/a	No estoy seguro/a	Verdadero	Verdadero	verdadero	Verdadero	Verdadero	Falso	Falso	Verdadero
Latacunga	Latacunga	25	Femenino	UTC	Veterinaria	4-6	COVID-19	De origen natural	Una entidad capaz de adaptarse y evolucionar	31 - 40	No estoy seguro/a	Verdadero	Verdadero	Verdadero	Falso	Falso	Verdadero	Verdadero	Verdadero	Verdadero	Verdadero	Verdadero	Verdadero	Verdadero	No estoy seguro/a	Falso	Verdadero	No estoy seguro/a	No estoy seguro/a	No estoy seguro/a	No estoy seguro/a	Falso	Verdadero	Verdadero
QUITO	LATACUNGA	28	Femenino	UTC	MEDICINA VETERINARIA	4-6	No estoy seguro/a	Creado en laboratorio	Un complot mediático	11 - 20	Verdadero	Verdadero	Verdadero	Verdadero	Falso	Falso	Verdadero	Verdadero	Verdadero	Verdadero	Verdadero	Verdadero	Verdadero	Verdadero	Falso	Verdadero	Verdadero	Falso	Falso	Verdadero	Falso	Falso	Falso	No estoy seguro/a
Latacunga	Quito	20	Femenino	UTC	Medicina Veterinaria	4-6	SARS-COV-2	No estoy seguro/a	Una entidad capaz de adaptarse y evolucionar	No estoy seguro/a	No estoy seguro/a	Verdadero	Verdadero	Verdadero	Falso	Falso	Verdadero	No estoy seguro/a	No estoy seguro/a	Verdadero	Verdadero	Verdadero	Verdadero	Verdadero	Falso	No estoy seguro/a	Verdadero	Falso	No estoy seguro/a	Verdadero	Verdadero	Falso	Falso	Verdadero
Pujili	Pujili	20	Femenino	UTC	Medicina Veterinaria	4-6	SARS-COV-2	De origen natural	Una entidad capaz de adaptarse y evolucionar	1 - 10	Verdadero	Verdadero	Verdadero	Verdadero	Falso	Falso	Verdadero	Falso	Verdadero	Verdadero	Verdadero	Verdadero	Verdadero	Verdadero	No estoy seguro/a	Verdadero	Verdadero	Falso	No estoy seguro/a	Verdadero	Verdadero	Falso	Falso	Verdadero
Pillaro	Pillaro	21	Femenino	UTC	Medicina Veterinaria	4-6	SARS-COV-2	Creado en laboratorio	Un complot mediático	21 - 30	Falso	Verdadero	Verdadero	Verdadero	Falso	Falso	Verdadero	Falso	Verdadero	Verdadero	Verdadero	Verdadero	Verdadero	Verdadero	No estoy seguro/a	No estoy seguro/a	Falso	Falso	Falso	Verdadero	Verdadero	Falso	Falso	Verdadero
Pujili	Latacunga	23	Femenino	UTC	Medicina Veterinaria	4-6	SARS-COV-2	Creado en laboratorio	Una entidad capaz de adaptarse y evolucionar	11 - 20	No estoy seguro/a	Verdadero	Verdadero	Verdadero	Verdadero	No estoy seguro/a	Verdadero	Falso	Verdadero	Verdadero	Verdadero	Verdadero	Verdadero	Verdadero	No estoy seguro/a	Verdadero	Verdadero	Verdadero	Falso	Verdadero	No estoy seguro/a	Falso	Falso	Verdadero
Latacunga	Latacunga	22	Masculino	UTC	Medicina veterinaria	4-6	No estoy seguro/a	De origen natural	Una entidad capaz de adaptarse y evolucionar	51 - 100	Verdadero	Verdadero	Verdadero	Verdadero	Falso	Falso	Verdadero	Falso	Verdadero	Verdadero	Verdadero	Verdadero	Verdadero	Verdadero	Falso	No estoy seguro/a	Verdadero	Verdadero	verdadero	Verdadero	Falso	Falso	Falso	Verdadero
Conocoto	Quito	26	Masculino	UTC	Medicina Veterinaria	4-6	SARS-COV-2	Creado en laboratorio	Una entidad capaz de adaptarse y evolucionar	11 - 20	Verdadero	Verdadero	Verdadero	Verdadero	Falso	Falso	Verdadero	Falso	Verdadero	Verdadero	Verdadero	Verdadero	Verdadero	Verdadero	Verdadero	Verdadero	Verdadero	Falso	Falso	Verdadero	Verdadero	Falso	Verdadero	Verdadero	Puede ser el uso de la ivermectina es cierto que impide la replican del virus en las células.
Latacunga	Latacunga	20	Masculino	UTC	Medicina Veterinaria	4-6	SARS-COV-2	Creado en laboratorio	Un complot mediático	No estoy seguro/a	No estoy seguro/a	Verdadero	Verdadero	Verdadero	Falso	Falso	Verdadero	Falso	Verdadero	Verdadero	Verdadero	Verdadero	Verdadero	Verdadero	No estoy seguro/a	Verdadero	Verdadero	Falso	Falso	No estoy seguro/a	Verdadero	Falso	Falso	Verdadero
SALCEDO	SALCEDO	21	Femenino	UTC	MEDICINA VETERINARIA	4-6	SARS-COV-2	De origen natural	No estoy seguro/a	No estoy seguro/a	Falso	Verdadero	Verdadero	Verdadero	Falso	Falso	Verdadero	Falso	Verdadero	Verdadero	Verdadero	No estoy seguro/a	Verdadero	Falso	Verdadero	No estoy seguro/a	Verdadero	Falso	Falso	No estoy seguro/a	Verdadero	Falso	Falso	Verdadero	TOMAR EN CUENTA A PERSONAS CON DIFERENTES ENFERMEDADES SI PUEDEN O NO SER MAS GRAVES EN CONLLEVAR ESTA ENFERMEDAD
Latacunga	Latacunga	20	Femenino	UTC	Medicina Veterinaria	7-9	SARS-COV-2	Creado en laboratorio	No estoy seguro/a	51 - 100	Falso	Verdadero	Verdadero	Verdadero	No estoy seguro/a	Falso	Verdadero	Falso	Verdadero	Verdadero	Verdadero	Verdadero	Verdadero	Verdadero	No estoy seguro/a	No estoy seguro/a	Falso	Falso	Falso	Verdadero	Verdadero	Falso	Falso	Verdadero
Quito	Quito	24	Femenino	UTC	Medicina Veterinaria	4-6	SARS-COV-2	De origen natural	Una entidad capaz de adaptarse y evolucionar	No estoy seguro/a	Verdadero	Verdadero	Verdadero	Verdadero	Falso	Falso	Verdadero	Falso	Verdadero	Verdadero	Verdadero	Verdadero	Verdadero	Verdadero	Verdadero	Verdadero	Verdadero	Falso	Falso	Falso	Falso	Falso	Falso	Verdadero
Quito	Quito	22	Femenino	UTC	Medicina Veterinaria	4-6	MERS-19	De origen natural	Una entidad capaz de adaptarse y evolucionar	51 - 100	Falso	Verdadero	Verdadero	Verdadero	Verdadero	Falso	Verdadero	Verdadero	Verdadero	Verdadero	Verdadero	Verdadero	Verdadero	Verdadero	No estoy seguro/a	No estoy seguro/a	Verdadero	Verdadero	No estoy seguro/a	Verdadero	Verdadero	Falso	Verdadero	Verdadero
QUITO	QUITO	20	Femenino	UTC	Medicina Veterinaria	4-6	No estoy seguro/a	Creado en laboratorio	Una entidad capaz de adaptarse y evolucionar	41 - 50	Falso	Verdadero	Verdadero	Verdadero	Falso	Falso	Verdadero	Verdadero	Verdadero	Verdadero	Verdadero	Verdadero	Verdadero	Verdadero	Falso	No estoy seguro/a	Verdadero	Falso	No estoy seguro/a	Falso	No estoy seguro/a	Falso	Falso	Verdadero	El contacto con los animales no es peligroso.. Pero se convierten en vectores imfecciosos por su pelaje o si salen a la calle pueden regresar con el virus en sus patas.
Pujilí	Quito	38	Femenino	UTC	Medicina Veterinaria	4-6	COVID-19	De origen natural	Una entidad capaz de adaptarse y evolucionar	No estoy seguro/a	No estoy seguro/a	Verdadero	Verdadero	Verdadero	Falso	Falso	Verdadero	Falso	Verdadero	Verdadero	Verdadero	Verdadero	Verdadero	Verdadero	Falso	No estoy seguro/a	Verdadero	Falso	No estoy seguro/a	No estoy seguro/a	No estoy seguro/a	Falso	Falso	Verdadero
Saquisilí	Francisco de Orellana	22	Masculino	UTC	Medicina Veterinaria	4-6	SARS-COV-2	De origen natural	Una entidad capaz de adaptarse y evolucionar	31 - 40	Verdadero	Verdadero	Verdadero	Verdadero	Falso	Falso	Verdadero	No estoy seguro/a	No estoy seguro/a	Verdadero	Verdadero	Falso	Verdadero	Verdadero	Falso	Verdadero	Verdadero	Falso	verdadero	Verdadero	Verdadero	Falso	Falso	Verdadero
Quito	Quito	22	Femenino	UTC	Medicina Veterinaria	4-6	SARS-COV-2	Creado en laboratorio	Una entidad capaz de adaptarse y evolucionar	41 - 50	Verdadero	Verdadero	Verdadero	Verdadero	Verdadero	Falso	Verdadero	Falso	Verdadero	Verdadero	No estoy seguro/a	Verdadero	Falso	Verdadero	Verdadero	Verdadero	Verdadero	Falso	Falso	Verdadero	Verdadero	Falso	Falso	Verdadero
Cantón Mejía	Machachi	20	Femenino	UTC	Medicina Veterinaria	4-6	COVID-19	De origen natural	Una entidad capaz de adaptarse y evolucionar	31 - 40	No estoy seguro/a	Verdadero	Verdadero	Verdadero	Falso	Falso	No estoy seguro/a	Falso	Verdadero	Verdadero	Verdadero	Verdadero	Verdadero	Verdadero	No estoy seguro/a	No estoy seguro/a	Verdadero	Falso	No estoy seguro/a	No estoy seguro/a	Falso	Falso	No estoy seguro/a	Verdadero
Riobamba	Riobamba	23	Femenino	UTC	Medicina Veterinaria	4-6	SARS-COV-2	De origen natural	Una entidad capaz de adaptarse y evolucionar	51 - 100	No estoy seguro/a	Verdadero	No estoy seguro/a	Verdadero	No estoy seguro/a	No estoy seguro/a	Verdadero	Falso	Verdadero	Verdadero	Verdadero	Verdadero	Verdadero	Verdadero	No estoy seguro/a	No estoy seguro/a	Verdadero	Verdadero	verdadero	Verdadero	No estoy seguro/a	Falso	Falso	Verdadero	Mi comentario sería que se encuentre la cura de una forma responsable
Santo Domingo	Santo Domingo	20	Masculino	UTC	Medicina Veterinaria	4-6	SARS-COV-2	De origen natural	Una entidad capaz de adaptarse y evolucionar	11 - 20	Verdadero	Verdadero	Verdadero	Verdadero	Falso	Falso	Verdadero	Verdadero	Verdadero	Verdadero	Verdadero	Verdadero	Verdadero	Verdadero	Verdadero	Verdadero	Verdadero	Falso	verdadero	Verdadero	Verdadero	Falso	Falso	Verdadero
Quito	Quito	21	Femenino	UTC	Medicina veterinaria	4-6	SARS-COV-2	Creado en laboratorio	Una entidad capaz de adaptarse y evolucionar	21 - 30	Verdadero	Verdadero	Verdadero	Verdadero	Falso	Falso	Verdadero	Verdadero	Verdadero	Verdadero	Verdadero	Verdadero	No estoy seguro/a	Verdadero	Verdadero	Verdadero	No estoy seguro/a	Falso	No estoy seguro/a	Verdadero	Falso	No estoy seguro/a	Falso	Verdadero
SALCEDO	QUITO	21	Femenino	UTC	VETERINARIA	4-6	No estoy seguro/a	Creado en laboratorio	Una entidad capaz de adaptarse y evolucionar	31 - 40	Verdadero	Verdadero	Verdadero	Verdadero	Verdadero	Falso	Verdadero	Verdadero	Verdadero	Verdadero	Verdadero	Verdadero	Verdadero	Verdadero	Verdadero	No estoy seguro/a	Falso	Falso	Falso	Verdadero	Verdadero	Falso	No estoy seguro/a	Verdadero
Latacunga	Quito	23	Femenino	UTC	Medicina Veterinaria	4-6	SARS-COV-2	De origen natural	Una entidad capaz de adaptarse y evolucionar	41 - 50	Verdadero	Verdadero	Verdadero	Verdadero	Falso	Falso	Verdadero	Falso	Verdadero	Verdadero	Verdadero	Verdadero	Verdadero	Verdadero	Falso	Verdadero	Verdadero	No estoy seguro/a	Falso	Falso	Falso	Falso	Falso	Verdadero
Latacunga	Latacunga	23	Masculino	UTC	Medicina Veterinaria	4-6	SARS-COV-2	Creado en laboratorio	Una entidad capaz de adaptarse y evolucionar	31 - 40	Verdadero	Verdadero	Verdadero	No estoy seguro/a	Falso	Falso	Verdadero	No estoy seguro/a	Verdadero	Verdadero	Verdadero	Verdadero	Verdadero	Verdadero	Falso	Verdadero	Verdadero	Falso	Falso	Verdadero	Verdadero	Falso	Falso	Verdadero
Latacunga	Latacunga	21	Masculino	UTC	Medicina Veterinaria	4-6	COVID-19	Creado en laboratorio	Una entidad capaz de adaptarse y evolucionar	1 - 10	No estoy seguro/a	Verdadero	Verdadero	Verdadero	Verdadero	Falso	Verdadero	Verdadero	Verdadero	Verdadero	Verdadero	Verdadero	Verdadero	Verdadero	No estoy seguro/a	No estoy seguro/a	Verdadero	Falso	Falso	Verdadero	Verdadero	Falso	Falso	Verdadero	Una mayor capacitación a todas las unidades educativas, para que así la nueva generación pueda ayudar, prevenir y contribuir a la crisis que se vive en la actualidad, y a muchas mas que probablemente se vengan en un futuro incierto.
LATACUNGA	AMBATO	25	Masculino	UTC	MEDICINA VETERINARIA	4-6	COVID-19	Creado en laboratorio	Una entidad capaz de adaptarse y evolucionar	51 - 100	Verdadero	Verdadero	Verdadero	Verdadero	Falso	Falso	Verdadero	Falso	Verdadero	Verdadero	Verdadero	Verdadero	Verdadero	Verdadero	Verdadero	Falso	Falso	Falso	verdadero	Verdadero	Verdadero	Falso	Falso	Verdadero	ES UNA ENCUESTA MUY IMPORTANTE YA QUE PUEDEN MEDIR EL CONOCIMIENTO SOBRE EL VIRUS Y SU CONTAGIO EN LA SOCIEDAD
Quito	Quito	23	Femenino	UTC	Medicina Veterinaria	4-6	SARS-COV-2	De origen natural	Una entidad capaz de adaptarse y evolucionar	41 - 50	Verdadero	Verdadero	Verdadero	Verdadero	Falso	Falso	Verdadero	Verdadero	Verdadero	Verdadero	Verdadero	Verdadero	Verdadero	Verdadero	Falso	Verdadero	Verdadero	Falso	Falso	No estoy seguro/a	Verdadero	Falso	Falso	Verdadero	Más iniciativas de estudios investigativos que involucren a los estudiantes. Excelente iniciativa !
Quito	Quito	24	Femenino	UTC	Medicina Veterinaria	4-6	SARS-COV-2	Creado en laboratorio	Un complot mediático	1 - 10	Falso	Verdadero	Verdadero	Verdadero	Falso	Falso	Verdadero	Verdadero	Verdadero	Verdadero	Verdadero	Verdadero	Verdadero	Verdadero	Verdadero	Verdadero	Verdadero	Falso	Falso	Verdadero	Verdadero	Falso	Falso	Verdadero
MACHACHI	QUITO	22	Masculino	UTC	MEDICINA VETERINARIA	4-6	SARS-COV-2	Creado en laboratorio	Una entidad capaz de adaptarse y evolucionar	31 - 40	Falso	No estoy seguro/a	Verdadero	Verdadero	Falso	Falso	Verdadero	Falso	Verdadero	Verdadero	No estoy seguro/a	Verdadero	Verdadero	Verdadero	Falso	Verdadero	Verdadero	Falso	Falso	Falso	Falso	Falso	Falso	Falso	considero que en varias ocasiones el control de una enfermedad no depende de lo que utilicemos para su cuidado o tratamiento, si no, de la cultura que la gente tiene ante estas situaciones de pandemia.
Tulcán	Tulcán	24	Masculino	UTC	Medicina veterinaria	4-6	No estoy seguro/a	De origen natural	Una entidad capaz de adaptarse y evolucionar	No estoy seguro/a	Verdadero	No estoy seguro/a	Verdadero	Verdadero	Falso	Falso	Verdadero	Falso	Verdadero	Verdadero	Verdadero	Verdadero	Verdadero	Verdadero	No estoy seguro/a	Verdadero	Verdadero	Falso	No estoy seguro/a	No estoy seguro/a	Verdadero	Falso	Falso	Verdadero	Recomiendo que se debe preparar mas a la población para evitar el contagio y la propagación del virus.
QUITO	QUITO	23	Femenino	UCE	DERECHO	9 en adelante	SARS-COV-2	Creado en laboratorio	No estoy seguro/a	No estoy seguro/a	No estoy seguro/a	Verdadero	Falso	Verdadero	No estoy seguro/a	No estoy seguro/a	Verdadero	No estoy seguro/a	Verdadero	Verdadero	Verdadero	Verdadero	Verdadero	No estoy seguro/a	No estoy seguro/a	No estoy seguro/a	No estoy seguro/a	Falso	No estoy seguro/a	Falso	No estoy seguro/a	Falso	No estoy seguro/a	No estoy seguro/a	Las preguntas son generales
El Chaco	Tumbaco	21	Masculino	UTC	MEDICINA VETERINARIA	4-6	SARS-COV-2	Creado en laboratorio	Una entidad capaz de adaptarse y evolucionar	11 - 20	Verdadero	Verdadero	Verdadero	Verdadero	Falso	Falso	Verdadero	Verdadero	Verdadero	Verdadero	Verdadero	Verdadero	Verdadero	Verdadero	Falso	Verdadero	Verdadero	Verdadero	No estoy seguro/a	Verdadero	Verdadero	Falso	Verdadero	Verdadero	SON PREGUNTAS NECESARIAS SOBRE DE COMO ESTAMOS PREPARADOS ANTE ESTA EMERGENCIA Y QUE MEDIDADAS DEBEMOS TOMAR.
Quito	Quito	24	Femenino	UTC	Medicina Veterinaria	4-6	SARS-COV-2	De origen natural	Una entidad capaz de adaptarse y evolucionar	1 - 10	Verdadero	Verdadero	Verdadero	Verdadero	Falso	Falso	Verdadero	Falso	Verdadero	Verdadero	Verdadero	Verdadero	Verdadero	Verdadero	Falso	Verdadero	Verdadero	Falso	Falso	Falso	Verdadero	Falso	Falso	Verdadero	Felicidades por la iniciativa
Quito	Quito	20	Femenino	UTC	Medicina Veterinaria	4-6	SARS-COV-2	Creado en laboratorio	Una entidad capaz de adaptarse y evolucionar	41 - 50	Verdadero	Verdadero	Verdadero	Verdadero	No estoy seguro/a	Falso	Verdadero	Falso	Verdadero	Verdadero	Verdadero	Verdadero	Verdadero	Verdadero	No estoy seguro/a	Verdadero	Verdadero	Falso	Falso	Falso	Verdadero	Falso	Falso	Falso
Cotacachi	Imbabura	38	Masculino	UDLA	Producción Animal	9 en adelante	SARS-COV-2	De origen natural	Una entidad capaz de adaptarse y evolucionar	1 - 10	Falso	Verdadero	Verdadero	Verdadero	Falso	Falso	Verdadero	Falso	Verdadero	Verdadero	Verdadero	Verdadero	Verdadero	Verdadero	Falso	Verdadero	Verdadero	Falso	verdadero	Verdadero	Verdadero	Falso	Falso	Verdadero
Quito	Quito	23	Femenino	UCE	Plurilingue	7-9	SARS-COV-2	Creado en laboratorio	Una entidad capaz de adaptarse y evolucionar	51 - 100	Falso	Verdadero	No estoy seguro/a	Verdadero	Falso	Falso	Verdadero	Verdadero	Verdadero	Verdadero	Verdadero	Verdadero	Verdadero	Verdadero	Verdadero	No estoy seguro/a	No estoy seguro/a	Falso	No estoy seguro/a	No estoy seguro/a	Verdadero	Falso	Verdadero	Verdadero
Cañar	Cañar	19	Masculino	YACHAY	Química	1-3	SARS-COV-2	De origen natural	Una entidad capaz de adaptarse y evolucionar	21 - 30	No estoy seguro/a	Verdadero	Verdadero	Verdadero	Falso	Falso	Verdadero	Verdadero	Verdadero	Verdadero	Verdadero	Verdadero	Verdadero	Verdadero	Falso	Verdadero	Verdadero	Falso	Falso	Verdadero	Falso	Falso	Falso	Verdadero
Quito	Quito	24	Masculino	UCE	Ingeniería Matemática	4-6	SARS-COV-2	Creado en laboratorio	Una entidad capaz de adaptarse y evolucionar	11 - 20	Verdadero	Verdadero	Verdadero	Verdadero	Falso	Falso	Verdadero	Verdadero	Verdadero	Verdadero	Verdadero	Verdadero	Verdadero	Verdadero	Verdadero	No estoy seguro/a	Verdadero	Verdadero	No estoy seguro/a	Verdadero	Falso	Falso	Verdadero	Verdadero	Quédate en casa
Santo Domingo	Santo Domingo de los Tsáchilas	21	Masculino	UCE	Ingeniería civil	1-3	SARS-COV-2	De origen natural	Un compuesto químico	31 - 40	Falso	Verdadero	Verdadero	Verdadero	Falso	Falso	Verdadero	Verdadero	Verdadero	Verdadero	Verdadero	Verdadero	Verdadero	Verdadero	Falso	Falso	Falso	Falso	Falso	Falso	Falso	Falso	Falso	Verdadero
Quito	Manabi	20	Femenino	UCE	Medicina	4-6	SARS-COV-2	De origen natural	Una entidad capaz de adaptarse y evolucionar	1 - 10	No estoy seguro/a	Verdadero	Verdadero	Verdadero	No estoy seguro/a	Falso	Verdadero	No estoy seguro/a	Verdadero	Verdadero	Verdadero	Verdadero	Verdadero	Verdadero	Falso	Verdadero	Verdadero	Falso	Falso	Falso	Verdadero	Falso	No estoy seguro/a	Verdadero
San Miguel de los Bancos	San Miguel de los Bancos	25	Masculino	UCE	Contabilidad y auditoría	1-3	SARS-COV-2	Creado en laboratorio	Una entidad capaz de adaptarse y evolucionar	11 - 20	Verdadero	Verdadero	Verdadero	Verdadero	Falso	Falso	Verdadero	Verdadero	Verdadero	Verdadero	Verdadero	Verdadero	Verdadero	Verdadero	Verdadero	Falso	Verdadero	Falso	Falso	No estoy seguro/a	Verdadero	Falso	Falso	Verdadero	Se debería dar una mayor información sobre dicha pandemia y si es causada que indemnice a cada país afectado
Quito	Quito	21	Masculino	UCE	Contabilidad y auditoria	1-3	COVID-19	De origen natural	Un compuesto químico	No estoy seguro/a	Falso	Verdadero	Verdadero	Verdadero	Falso	Falso	Verdadero	Verdadero	Verdadero	Verdadero	Verdadero	Verdadero	Verdadero	No estoy seguro/a	No estoy seguro/a	No estoy seguro/a	Verdadero	Falso	No estoy seguro/a	Verdadero	Verdadero	No estoy seguro/a	Verdadero	Verdadero
Quito	Quito	27	Masculino	UCE	Agronomía	1-3	SARS-COV-2	Creado en laboratorio	Una entidad capaz de adaptarse y evolucionar	1 - 10	Verdadero	Verdadero	Verdadero	Falso	Falso	Falso	Verdadero	Verdadero	Falso	Verdadero	Verdadero	Verdadero	Verdadero	Verdadero	Falso	Falso	Verdadero	Falso	Falso	Verdadero	Verdadero	Falso	Falso	Verdadero
Quito	Quito	23	Femenino	UCE	Química Farmacéutica	7-9	SARS-COV-2	De origen natural	Una entidad capaz de adaptarse y evolucionar	21 - 30	Falso	Verdadero	Verdadero	Verdadero	Falso	Falso	Verdadero	Verdadero	Verdadero	Verdadero	Verdadero	Verdadero	Verdadero	Verdadero	Falso	Falso	Verdadero	Falso	Falso	Falso	Verdadero	Falso	Falso	Verdadero
Quito	Quito	18	Masculino	UCE	Biología	1-3	SARS-COV-2	De origen natural	No estoy seguro/a	11 - 20	No estoy seguro/a	Verdadero	No estoy seguro/a	Verdadero	Falso	Falso	Verdadero	Falso	Verdadero	Verdadero	Verdadero	Verdadero	Verdadero	Verdadero	Falso	No estoy seguro/a	Verdadero	Falso	Falso	No estoy seguro/a	Falso	No estoy seguro/a	Falso	Verdadero
Quito	Quito	21	Femenino	UCE	Si	1-3	COVID-19	Creado en laboratorio	Una entidad capaz de adaptarse y evolucionar	21 - 30	Verdadero	Verdadero	Verdadero	No estoy seguro/a	Falso	Falso	Verdadero	Falso	Verdadero	Verdadero	Verdadero	Verdadero	Verdadero	Verdadero	No estoy seguro/a	Verdadero	No estoy seguro/a	Falso	Falso	Falso	Verdadero	No estoy seguro/a	Falso	Verdadero
Quito	Quito	23	Masculino	UCE	Pedagógia de las ciencias experimentales de la Informática	4-6	COVID-19	Creado en laboratorio	Una entidad capaz de adaptarse y evolucionar	41 - 50	Verdadero	Verdadero	Verdadero	Verdadero	Falso	Falso	Verdadero	Verdadero	Verdadero	Verdadero	Verdadero	Verdadero	Verdadero	Verdadero	Falso	No estoy seguro/a	Verdadero	Falso	verdadero	Verdadero	Falso	Falso	Falso	Verdadero	Debería ser obligatoria en cada facultad, para poder tener datos mas precisos de todos los estudiantes.
Puyo	Latacunga	35	Masculino	UCE	Educación	9 en adelante	SARS-COV-2	De origen natural	Una entidad capaz de adaptarse y evolucionar	1 - 10	Falso	Verdadero	Verdadero	Verdadero	Falso	Falso	Verdadero	Verdadero	Verdadero	Verdadero	Verdadero	Verdadero	Verdadero	Verdadero	Falso	Verdadero	Verdadero	Falso	Falso	Verdadero	Falso	Falso	Falso	Verdadero
Latacunga	Latacunga	32	Femenino	UTC	Graduada	9 en adelante	SARS-COV-2	Creado en laboratorio	Una entidad capaz de adaptarse y evolucionar	11 - 20	Falso	Verdadero	Verdadero	Verdadero	Falso	Falso	Verdadero	Verdadero	Verdadero	Verdadero	Verdadero	Verdadero	Verdadero	Verdadero	Falso	Verdadero	Verdadero	Falso	Falso	Verdadero	Verdadero	Falso	Falso	Verdadero
Quito	Quito	24	Masculino	UCE	Economía	7-9	SARS-COV-2	De origen natural	Una entidad capaz de adaptarse y evolucionar	1 - 10	No estoy seguro/a	Verdadero	Verdadero	Verdadero	Falso	Falso	Verdadero	No estoy seguro/a	Verdadero	Verdadero	Verdadero	Verdadero	Verdadero	Verdadero	No estoy seguro/a	Verdadero	Verdadero	Falso	Falso	No estoy seguro/a	No estoy seguro/a	Falso	Falso	Verdadero
Quito	Quito	22	Femenino	UCE	Odontología	4-6	SARS-COV-2	No estoy seguro/a	Una entidad capaz de adaptarse y evolucionar	No estoy seguro/a	Verdadero	Verdadero	Verdadero	Verdadero	No estoy seguro/a	Falso	Verdadero	Verdadero	Verdadero	Verdadero	Verdadero	Verdadero	Verdadero	Verdadero	Falso	Verdadero	Falso	Falso	No estoy seguro/a	Falso	Verdadero	Falso	Falso	Verdadero	La encuenta está bien formulada, pero si hubiera una opción para escribir sería mejor.
Quito	Tulcán	24	Masculino	UCE	Licenciatura en Contabilidad y Auditoria	7-9	COVID-19	De origen natural	Una entidad capaz de adaptarse y evolucionar	21 - 30	Verdadero	Verdadero	Verdadero	Verdadero	Falso	Falso	Verdadero	Falso	Verdadero	Verdadero	Verdadero	Verdadero	Verdadero	Verdadero	Verdadero	Verdadero	Verdadero	Verdadero	Falso	Falso	Falso	Falso	Falso	Verdadero
QUITO	QUITO	26	Femenino	UCE	ARQUITECTURA	9 en adelante	SARS-COV-2	De origen natural	Una entidad capaz de adaptarse y evolucionar	11 - 20	No estoy seguro/a	Verdadero	Verdadero	Verdadero	Falso	Falso	Verdadero	Falso	Verdadero	Verdadero	Verdadero	Verdadero	Verdadero	Verdadero	Falso	Verdadero	Verdadero	Falso	Falso	Verdadero	Verdadero	No estoy seguro/a	Falso	Verdadero
Quito	Quito	42	Masculino	UCE	Maestría en Gestión Pública	9 en adelante	SARS-COV-2	De origen natural	Una entidad capaz de adaptarse y evolucionar	11 - 20	Verdadero	Verdadero	Verdadero	Verdadero	Verdadero	Falso	Verdadero	No estoy seguro/a	Verdadero	Verdadero	Verdadero	Verdadero	Verdadero	Verdadero	Falso	Verdadero	Verdadero	Falso	Falso	Falso	Verdadero	Falso	Falso	Verdadero
Sangolqui	Quito	24	Femenino	UCE	Psicología	9 en adelante	SARS-COV-2	Creado en laboratorio	Un complot mediático	21 - 30	No estoy seguro/a	Verdadero	Verdadero	No estoy seguro/a	Falso	Falso	Verdadero	Falso	Verdadero	Falso	Verdadero	Verdadero	Verdadero	Verdadero	No estoy seguro/a	Verdadero	Verdadero	Falso	Falso	Falso	Verdadero	Falso	Falso	Verdadero	Sería bueno que a cada pregunta abajo aprezca la respuesta correcta
Santo Domingo	Santo Domingo	23	Femenino	UCE	Laboratorio clínico	4-6	SARS-COV-2	De origen natural	Una entidad capaz de adaptarse y evolucionar	1 - 10	Verdadero	Verdadero	Verdadero	Verdadero	Falso	Falso	Verdadero	No estoy seguro/a	Verdadero	Verdadero	Verdadero	Verdadero	Verdadero	Verdadero	Falso	Verdadero	Verdadero	Falso	Falso	Falso	Verdadero	Falso	Falso	Verdadero
Quito	Tena	26	Masculino	UCE	Medicina	9 en adelante	SARS-COV-2	De origen natural	Una entidad capaz de adaptarse y evolucionar	1 - 10	Verdadero	Verdadero	Verdadero	Verdadero	Falso	Falso	Verdadero	Falso	Verdadero	Verdadero	Verdadero	Verdadero	Verdadero	Verdadero	Falso	Verdadero	Verdadero	Falso	Falso	Falso	Verdadero	Falso	Falso	Verdadero	Sería interesante añadir la pregunta en relacion a la Ivermectina, ya que solo demostró efectividad In vitro y la dosis necesaria es superior al margen terapéutico seguro.
Quito	Ibarra	22	Masculino	UCE	Derecho	9 en adelante	SARS-COV-2	Creado en laboratorio	Una entidad capaz de adaptarse y evolucionar	1 - 10	Verdadero	Verdadero	Verdadero	Verdadero	Falso	Falso	Verdadero	No estoy seguro/a	Verdadero	Verdadero	Verdadero	No estoy seguro/a	Verdadero	Verdadero	Verdadero	No estoy seguro/a	No estoy seguro/a	Falso	Falso	No estoy seguro/a	No estoy seguro/a	Falso	Falso	Verdadero
Quito	Quito	22	Masculino	UCE	Ingeniería en Geología	4-6	SARS-COV-2	De origen natural	Una entidad capaz de adaptarse y evolucionar	11 - 20	Verdadero	No estoy seguro/a	Verdadero	Verdadero	Falso	Falso	Verdadero	No estoy seguro/a	Falso	Verdadero	Verdadero	Verdadero	Verdadero	Verdadero	Verdadero	Verdadero	Verdadero	Verdadero	Falso	No estoy seguro/a	Falso	Falso	Falso	Verdadero
Loja	Loja	18	Masculino	YACHAY	nanoteconologia	1-3	SARS-COV-2	De origen natural	Una entidad capaz de adaptarse y evolucionar	1 - 10	Falso	Verdadero	Verdadero	Verdadero	Verdadero	Falso	Verdadero	No estoy seguro/a	Verdadero	Verdadero	Verdadero	Verdadero	Verdadero	Verdadero	Falso	No estoy seguro/a	Verdadero	Falso	Falso	No estoy seguro/a	Verdadero	Falso	Falso	Verdadero
quito	Riobamba	28	Masculino	UCE	Administración de Empresas	9 en adelante	SARS-COV-2	No estoy seguro/a	Una entidad capaz de adaptarse y evolucionar	1 - 10	Verdadero	Verdadero	Verdadero	Falso	Verdadero	Falso	Verdadero	Verdadero	Verdadero	Verdadero	Verdadero	Verdadero	Verdadero	Verdadero	No estoy seguro/a	Falso	Verdadero	Falso	Falso	Verdadero	Falso	Falso	Falso	Verdadero
Latacunga	Latacunga	19	Masculino	UCE	Psicología	1-3	No estoy seguro/a	Creado en laboratorio	Una entidad capaz de adaptarse y evolucionar	31 - 40	Falso	Verdadero	Verdadero	Verdadero	Falso	Falso	Verdadero	Falso	Verdadero	Verdadero	Verdadero	Verdadero	Verdadero	Verdadero	Falso	Falso	Verdadero	Falso	Falso	Verdadero	Verdadero	Falso	Falso	Verdadero	mi recomendación seria acudir directamente a médicos y no actuar por cuenta de uno mismo ay que por eso surgieron "curas" falsas como son el dióxido de cloro o las vacunas que ponen a los animales, que si mas bien se sabe que son fuertes puesto que son para los animales y tal vez a algunas personas les aya ayudado a recuperarse, el resultado que deja a largo tiempo puede ser catastrófico como el …
Quito	Quito	25	Femenino	UCE	Ciencias Biológicas y Ambientales	7-9	SARS-COV-2	De origen natural	Una entidad capaz de adaptarse y evolucionar	No estoy seguro/a	Verdadero	Verdadero	Verdadero	Verdadero	Verdadero	Falso	Verdadero	Verdadero	Verdadero	Verdadero	Verdadero	Verdadero	Verdadero	Verdadero	Falso	Verdadero	Verdadero	Falso	Falso	Verdadero	Verdadero	Falso	Falso	Verdadero
Cayambe	Cayambe	20	Femenino	UCE	Derecho	4-6	No estoy seguro/a	No estoy seguro/a	Una entidad capaz de adaptarse y evolucionar	No estoy seguro/a	No estoy seguro/a	Verdadero	Verdadero	Verdadero	No estoy seguro/a	Falso	Verdadero	Verdadero	Verdadero	Verdadero	Verdadero	Verdadero	Verdadero	Verdadero	No estoy seguro/a	No estoy seguro/a	Verdadero	Falso	Falso	No estoy seguro/a	Verdadero	Falso	Falso	Verdadero
Quito	Quito	22	Femenino	UCE	Trabajo Social	7-9	COVID-19	De origen natural	No estoy seguro/a	No estoy seguro/a	Verdadero	Verdadero	Verdadero	Verdadero	Falso	Falso	Verdadero	Verdadero	Verdadero	Verdadero	Verdadero	Verdadero	Verdadero	Verdadero	Verdadero	Falso	No estoy seguro/a	Falso	verdadero	Falso	Verdadero	Falso	Falso	Verdadero
Quito	Quito	24	Masculino	UCE	Ingeniería Civil	7-9	SARS-COV-2	Creado en laboratorio	Una entidad capaz de adaptarse y evolucionar	11 - 20	Verdadero	Verdadero	Verdadero	Verdadero	No estoy seguro/a	Falso	Verdadero	Verdadero	Verdadero	Verdadero	Verdadero	Verdadero	Verdadero	Verdadero	Falso	Verdadero	Verdadero	Falso	Falso	Verdadero	No estoy seguro/a	Falso	Falso	Verdadero
QUITO	QUITO	26	Femenino	UCE	ODONTOLOGIA	7-9	SARS-COV-2	Creado en laboratorio	Una entidad capaz de adaptarse y evolucionar	11 - 20	Falso	Verdadero	Verdadero	Verdadero	Falso	Falso	Verdadero	Verdadero	Verdadero	Verdadero	Verdadero	Verdadero	Verdadero	Verdadero	Falso	No estoy seguro/a	Verdadero	Falso	verdadero	Falso	Verdadero	Falso	Falso	Verdadero
Quito	Quito	21	Femenino	UCE	Fonoaudiologia	1-3	SARS-COV-2	Creado en laboratorio	Una entidad capaz de adaptarse y evolucionar	21 - 30	Verdadero	Verdadero	Verdadero	Verdadero	No estoy seguro/a	Falso	Verdadero	Falso	Verdadero	Verdadero	Verdadero	Verdadero	Verdadero	Verdadero	No estoy seguro/a	No estoy seguro/a	Verdadero	Falso	Falso	Falso	Verdadero	Falso	Verdadero	Verdadero
Quito	Quito	24	Femenino	UCE	Matemática y Física	4-6	SARS-COV-2	Creado en laboratorio	Una entidad capaz de adaptarse y evolucionar	21 - 30	No estoy seguro/a	Verdadero	Verdadero	Verdadero	Falso	Falso	Falso	Verdadero	Verdadero	Verdadero	Verdadero	Verdadero	Verdadero	Verdadero	No estoy seguro/a	No estoy seguro/a	No estoy seguro/a	Falso	No estoy seguro/a	No estoy seguro/a	Verdadero	Falso	Falso	Verdadero
Cayambe	Cayambe	24	Masculino	UCE	Medicina	9 en adelante	SARS-COV-2	De origen natural	Una entidad capaz de adaptarse y evolucionar	1 - 10	Verdadero	Verdadero	Verdadero	Verdadero	Falso	Falso	Verdadero	Falso	Verdadero	Verdadero	Verdadero	Verdadero	Verdadero	Verdadero	Verdadero	Verdadero	Verdadero	Falso	Falso	Falso	Verdadero	Falso	Verdadero	Verdadero	formular adecuadamente las preguntas en cuanto a las pruebas rápidas y pruebas moleculares, la epidemiologia en relación a las tasas de mortalidad se manejan en porcentajes no como respuestas de 1 a 10 buscar indice de prevalencia y tasa de mortalidad, hacer incapie en el distanciamiento social y el uso adecuado de mascarillas, Demasiadas preguntas repetidas consolidar las preguntas de manera con…
Pujilí	Pujilí	24	Femenino	Espe	Electrónica	7-9	SARS-COV-2	De origen natural	Una entidad capaz de adaptarse y evolucionar	1 - 10	Falso	Verdadero	Verdadero	Verdadero	Falso	Falso	Verdadero	Falso	Verdadero	Verdadero	Verdadero	Verdadero	Verdadero	Verdadero	Verdadero	No estoy seguro/a	Verdadero	Falso	Falso	Falso	Verdadero	Falso	Falso	Verdadero
Quito	Quito	18	Femenino	UCE	Administración pública	1-3	SARS-COV-2	Creado en laboratorio	Una entidad capaz de adaptarse y evolucionar	1 - 10	Verdadero	Verdadero	Verdadero	Verdadero	Falso	Falso	Verdadero	Falso	Verdadero	Verdadero	Verdadero	Verdadero	Verdadero	Verdadero	No estoy seguro/a	Falso	Verdadero	Falso	verdadero	Falso	Verdadero	Falso	Falso	Verdadero
Quito	Quito	21	Masculino	UCE	Administracion de Empresas	1-3	SARS-COV-2	De origen natural	Una entidad capaz de adaptarse y evolucionar	1 - 10	Verdadero	Verdadero	Verdadero	Verdadero	Falso	Falso	Verdadero	Verdadero	Verdadero	Verdadero	Verdadero	Verdadero	Verdadero	Verdadero	No estoy seguro/a	Falso	Verdadero	Falso	Falso	Falso	Verdadero	Falso	Falso	Verdadero
Quito	Quito	22	Masculino	UCE	Turismo	4-6	SARS-COV-2	De origen natural	Una entidad capaz de adaptarse y evolucionar	1 - 10	Falso	Verdadero	Verdadero	Verdadero	Falso	Falso	Verdadero	Verdadero	Verdadero	Verdadero	Verdadero	Verdadero	Verdadero	Verdadero	No estoy seguro/a	No estoy seguro/a	Verdadero	Falso	Falso	Falso	Verdadero	Falso	Falso	Verdadero
Quito	Quito	19	Femenino	UCE	Laboratorio Clínico	1-3	SARS-COV-2	De origen natural	Una entidad capaz de adaptarse y evolucionar	1 - 10	Verdadero	Verdadero	Verdadero	Verdadero	Verdadero	Falso	Verdadero	Verdadero	Verdadero	Verdadero	Verdadero	Verdadero	Verdadero	Verdadero	Falso	Verdadero	Verdadero	Falso	Falso	Falso	Falso	Falso	Falso	Verdadero
Cayambe	Cayambe	23	Femenino	UTN	Ingeniería en biotecnologia	4-6	SARS-COV-2	De origen natural	Una entidad capaz de adaptarse y evolucionar	11 - 20	Falso	Verdadero	Verdadero	Verdadero	No estoy seguro/a	Falso	Verdadero	Verdadero	Verdadero	Verdadero	Verdadero	Verdadero	Verdadero	Verdadero	No estoy seguro/a	Falso	Verdadero	Falso	Falso	No estoy seguro/a	Verdadero	Falso	Falso	Verdadero
Quito	Quito	29	Masculino	UCE	Trabajo Social	4-6	SARS-COV-2	No estoy seguro/a	Una entidad capaz de adaptarse y evolucionar	1 - 10	Verdadero	Verdadero	Verdadero	Verdadero	Verdadero	Verdadero	Verdadero	Falso	Verdadero	Verdadero	Verdadero	Verdadero	Verdadero	Verdadero	Falso	Verdadero	Verdadero	Falso	No estoy seguro/a	No estoy seguro/a	Verdadero	Falso	Falso	Verdadero
Quito	Quito	25	Masculino	UCE	Administración de Empresas	1-3	SARS-COV-2	De origen natural	Una entidad capaz de adaptarse y evolucionar	1 - 10	Verdadero	Verdadero	Verdadero	Verdadero	Falso	Falso	Verdadero	Verdadero	Verdadero	Verdadero	Verdadero	Verdadero	Verdadero	Verdadero	Verdadero	Verdadero	Verdadero	Falso	Falso	Falso	Verdadero	Falso	Falso	Verdadero
Quito	Santo Domingo	27	Femenino	UCE	Pedagogía de la lengua y literatura	4-6	SARS-COV-2	Creado en laboratorio	Una entidad capaz de adaptarse y evolucionar	41 - 50	Verdadero	Verdadero	Verdadero	Verdadero	Falso	Falso	Verdadero	Falso	Verdadero	Verdadero	Verdadero	Verdadero	Verdadero	Verdadero	Falso	Falso	Verdadero	Falso	Falso	Falso	Verdadero	Falso	Falso	Verdadero
Machachi	Machachi	21	Masculino	UCE	Obstetricia	1-3	SARS-COV-2	No estoy seguro/a	Una entidad capaz de adaptarse y evolucionar	1 - 10	Verdadero	Verdadero	Verdadero	Verdadero	Falso	Falso	Verdadero	Falso	Verdadero	Verdadero	Verdadero	Verdadero	Verdadero	Verdadero	Falso	Verdadero	Verdadero	Falso	Falso	Falso	Verdadero	Falso	Falso	Verdadero
Quito	Quito	29	Masculino	UCE	CIENCIAS SOCIALES	9 en adelante	SARS-COV-2	De origen natural	Una entidad capaz de adaptarse y evolucionar	1 - 10	Verdadero	Verdadero	Verdadero	Verdadero	Falso	Falso	Verdadero	Falso	Verdadero	Verdadero	Verdadero	Verdadero	Verdadero	Verdadero	Verdadero	Verdadero	Verdadero	Falso	No estoy seguro/a	No estoy seguro/a	Falso	Falso	Falso	Verdadero
Puyo	Ambato	18	Femenino	UCE	Medicina	1-3	SARS-COV-2	Creado en laboratorio	Una entidad capaz de adaptarse y evolucionar	1 - 10	Verdadero	Verdadero	Verdadero	Verdadero	Falso	Falso	Verdadero	Verdadero	Verdadero	Verdadero	Verdadero	Verdadero	Verdadero	Verdadero	No estoy seguro/a	Verdadero	Verdadero	Falso	Falso	Verdadero	Verdadero	Falso	Falso	Verdadero
Quito	Quito	22	Femenino	UCE	Pedagogía en Química y Biología	4-6	SARS-COV-2	De origen natural	Una entidad capaz de adaptarse y evolucionar	1 - 10	Verdadero	Verdadero	Verdadero	Verdadero	Verdadero	Falso	Verdadero	Verdadero	Verdadero	Verdadero	Verdadero	Verdadero	Verdadero	Verdadero	Falso	Verdadero	Verdadero	Falso	Falso	Falso	Verdadero	Falso	Falso	Verdadero
Atuntaqui	Atuntaqui	19	Masculino	YACHAY	Tronco común	1-3	No estoy seguro/a	No estoy seguro/a	Una entidad capaz de adaptarse y evolucionar	51 - 100	Verdadero	Verdadero	No estoy seguro/a	Verdadero	Falso	Falso	Verdadero	Verdadero	Verdadero	Verdadero	Verdadero	Verdadero	Verdadero	Verdadero	Falso	No estoy seguro/a	Verdadero	Falso	No estoy seguro/a	Verdadero	No estoy seguro/a	Falso	Verdadero	Verdadero
Quito	Quito	23	Femenino	UCE	Enfermería	7-9	SARS-COV-2	De origen natural	Una entidad capaz de adaptarse y evolucionar	No estoy seguro/a	Verdadero	Verdadero	Verdadero	Verdadero	Falso	Falso	Verdadero	Falso	Verdadero	Verdadero	Verdadero	Verdadero	Verdadero	Verdadero	Verdadero	Verdadero	Verdadero	Falso	Falso	Verdadero	Falso	Falso	Falso	Verdadero
Quito	Ibarra	48	Masculino	UCE	Economia	9 en adelante	SARS-COV-2	De origen natural	Una entidad capaz de adaptarse y evolucionar	1 - 10	Falso	Verdadero	Verdadero	Verdadero	Falso	Falso	Verdadero	Falso	Verdadero	Verdadero	Verdadero	Verdadero	Verdadero	Verdadero	Falso	Verdadero	Verdadero	Falso	Falso	Falso	Falso	Falso	Falso	Verdadero
Quito	Quito	24	Masculino	UCE	Bioquímica Clínica	7-9	SARS-COV-2	De origen natural	Una entidad capaz de adaptarse y evolucionar	No estoy seguro/a	Verdadero	Verdadero	Verdadero	Verdadero	Falso	Falso	Verdadero	Verdadero	Verdadero	Verdadero	Verdadero	Verdadero	Verdadero	Verdadero	Falso	Verdadero	Verdadero	Falso	Falso	Falso	Verdadero	Falso	Falso	Verdadero
Puyo	Pelileo	27	Femenino	UEA	Ingeniería Ambiental	7-9	SARS-COV-2	Creado en laboratorio	Una entidad capaz de adaptarse y evolucionar	41 - 50	Verdadero	Verdadero	Verdadero	Verdadero	Falso	Falso	Verdadero	Verdadero	Verdadero	Verdadero	Verdadero	Verdadero	Verdadero	Verdadero	Verdadero	Falso	Verdadero	Falso	Falso	Verdadero	Verdadero	Falso	Falso	Verdadero
Ambato	Ambato	29	Femenino	UTA	Psicología clínica	4-6	SARS-COV-2	Creado en laboratorio	Una entidad capaz de adaptarse y evolucionar	51 - 100	Verdadero	Verdadero	Verdadero	Verdadero	Falso	Falso	Verdadero	Falso	Verdadero	Verdadero	Verdadero	Verdadero	Verdadero	Verdadero	Falso	Falso	Verdadero	Falso	Falso	No estoy seguro/a	Verdadero	Falso	Verdadero	Verdadero
Quito	Santo Domingo	24	Masculino	UCE	Economía	7-9	SARS-COV-2	De origen natural	Una entidad capaz de adaptarse y evolucionar	1 - 10	No estoy seguro/a	Verdadero	Verdadero	Verdadero	Falso	Falso	Verdadero	Verdadero	Verdadero	Verdadero	Verdadero	Verdadero	Verdadero	Verdadero	Falso	No estoy seguro/a	Verdadero	Falso	Falso	Verdadero	Verdadero	Falso	Falso	Verdadero
Ibarra	Ibarra	18	Femenino	UCE	Ingeniería Ambiental	1-3	SARS-COV-2	Creado en laboratorio	Una entidad capaz de adaptarse y evolucionar	11 - 20	Verdadero	Verdadero	Verdadero	Verdadero	Falso	Falso	Verdadero	Verdadero	Verdadero	Verdadero	Verdadero	Verdadero	Verdadero	Verdadero	Falso	Falso	Verdadero	Falso	Falso	Falso	Verdadero	Falso	Falso	Verdadero
Orellana	Ambato	22	Masculino	UEA	Ing. Ambiental	7-9	SARS-COV-2	De origen natural	Una entidad capaz de adaptarse y evolucionar	No estoy seguro/a	Verdadero	Verdadero	Verdadero	Verdadero	Verdadero	Falso	Verdadero	Verdadero	Verdadero	Verdadero	Verdadero	Verdadero	Verdadero	Verdadero	Falso	Verdadero	No estoy seguro/a	Falso	Falso	Verdadero	Verdadero	Falso	Falso	Verdadero
Quito	Quito	30	Femenino	ISTCT	Técnico eléctrico	9 en adelante	SARS-COV-2	Creado en laboratorio	Una entidad capaz de adaptarse y evolucionar	1 - 10	Verdadero	Verdadero	Verdadero	Verdadero	Falso	Falso	Verdadero	Falso	Verdadero	Verdadero	Verdadero	Verdadero	Verdadero	Verdadero	Verdadero	Verdadero	Verdadero	No estoy seguro/a	No estoy seguro/a	No estoy seguro/a	Verdadero	Falso	Falso	Verdadero
Quito	Quito	27	Masculino	UCE	Bioquimica Clínica	9 en adelante	SARS-COV-2	De origen natural	Una entidad capaz de adaptarse y evolucionar	1 - 10	Falso	Falso	Verdadero	Verdadero	Falso	Falso	Verdadero	Verdadero	Verdadero	Verdadero	Verdadero	Verdadero	Verdadero	Verdadero	Falso	Verdadero	Verdadero	Falso	Falso	Falso	Verdadero	Falso	Falso	Verdadero
Quito	Quito	20	Femenino	UCE	Psicopedagogia	1-3	COVID-19	Creado en laboratorio	No estoy seguro/a	31 - 40	Verdadero	Verdadero	No estoy seguro/a	Verdadero	Falso	Falso	Verdadero	Falso	Verdadero	Verdadero	Verdadero	Verdadero	Verdadero	Verdadero	Falso	Falso	Verdadero	Falso	No estoy seguro/a	Verdadero	Verdadero	Falso	Falso	Verdadero	Me parecio interesante, aunque el tema debe ser conocido minuciosamente pienso que pueda que exista confuciones sobre: sintomas, seguridad falsa,etc
Quito	Quito	22	Masculino	UCE	Biología	7-9	SARS-COV-2	De origen natural	Una entidad capaz de adaptarse y evolucionar	1 - 10	Verdadero	Verdadero	Verdadero	Verdadero	Falso	Falso	Verdadero	Verdadero	Verdadero	Verdadero	Verdadero	Verdadero	Verdadero	Verdadero	Falso	Verdadero	Verdadero	Falso	Falso	Falso	Verdadero	Falso	Falso	Verdadero	Revisar los errores en la escritura de las preguntas
Quito	Quito	25	Femenino	UCE	Ingeniería en Finanzas	7-9	SARS-COV-2	No estoy seguro/a	Una entidad capaz de adaptarse y evolucionar	No estoy seguro/a	No estoy seguro/a	Verdadero	Verdadero	Verdadero	Falso	Falso	Verdadero	Falso	Verdadero	Verdadero	Verdadero	Verdadero	Verdadero	Verdadero	Falso	Verdadero	Verdadero	Falso	Falso	Verdadero	Verdadero	Falso	Falso	Verdadero	Más que un comentario es una inquietud ¿el virus puede permanecer en la ropa?
Quito	Quito	21	Femenino	UCE	Medicina	1-3	SARS-COV-2	De origen natural	Una entidad capaz de adaptarse y evolucionar	1 - 10	Verdadero	Verdadero	Verdadero	Verdadero	No estoy seguro/a	Falso	Verdadero	Falso	Verdadero	Verdadero	Verdadero	Verdadero	Verdadero	Verdadero	Falso	Verdadero	Verdadero	Falso	Falso	Falso	Verdadero	Falso	Falso	Verdadero
Quito	Ambato	22	Femenino	UCE	Psicólogia	7-9	SARS-COV-2	Creado en laboratorio	Una entidad capaz de adaptarse y evolucionar	51 - 100	Verdadero	Verdadero	Verdadero	Verdadero	Falso	Falso	Verdadero	No estoy seguro/a	Verdadero	Verdadero	Verdadero	Verdadero	Verdadero	Verdadero	Falso	No estoy seguro/a	Verdadero	Falso	Falso	Verdadero	Verdadero	Falso	Falso	Verdadero
Quito	Quito	26	Masculino	UCE	Ingeniería en Petróleos	9 en adelante	SARS-COV-2	No estoy seguro/a	No estoy seguro/a	No estoy seguro/a	No estoy seguro/a	Verdadero	Verdadero	Verdadero	Falso	Falso	Verdadero	No estoy seguro/a	No estoy seguro/a	Verdadero	Verdadero	Verdadero	No estoy seguro/a	Verdadero	Falso	No estoy seguro/a	Verdadero	Falso	Falso	No estoy seguro/a	No estoy seguro/a	No estoy seguro/a	Falso	Verdadero
Quito	Riobamba	20	Masculino	UCE	Comunicación social	1-3	SARS-COV-2	De origen natural	Una entidad capaz de adaptarse y evolucionar	1 - 10	Verdadero	Verdadero	Verdadero	Verdadero	Falso	Falso	Verdadero	Falso	Verdadero	Verdadero	Verdadero	Verdadero	Verdadero	Verdadero	Falso	Falso	Verdadero	Falso	Falso	Verdadero	Verdadero	Falso	Falso	Verdadero	Ninguno
Quito	Quito	21	Femenino	UCE	Enfermería	7-9	SARS-COV-2	De origen natural	Una entidad capaz de adaptarse y evolucionar	21 - 30	Verdadero	Falso	Verdadero	Verdadero	Falso	Falso	Verdadero	Verdadero	Verdadero	Verdadero	Verdadero	Verdadero	Verdadero	Verdadero	No estoy seguro/a	Verdadero	Verdadero	Falso	Falso	Falso	Verdadero	Falso	Falso	Verdadero
Baños de Agua Santa	Baños de Agua Santa	20	Masculino	UCE	Bioquímica y Farmacia	1-3	No estoy seguro/a	No estoy seguro/a	Una entidad capaz de adaptarse y evolucionar	No estoy seguro/a	Falso	Verdadero	Verdadero	Verdadero	Falso	Verdadero	No estoy seguro/a	Falso	Verdadero	Verdadero	Verdadero	Verdadero	Verdadero	Verdadero	Falso	No estoy seguro/a	No estoy seguro/a	Falso	Falso	Verdadero	Verdadero	Falso	Falso	Verdadero
Otavalo	Quito	20	Femenino	UCE	Pedagogía de las Ciencias Experimentales Química y Biología	1-3	SARS-COV-2	Creado en laboratorio	Una entidad capaz de adaptarse y evolucionar	51 - 100	Verdadero	Verdadero	Verdadero	Verdadero	Falso	Falso	Verdadero	Falso	Verdadero	Verdadero	Verdadero	Verdadero	Verdadero	Verdadero	Falso	Falso	Verdadero	Falso	Falso	Falso	Falso	Falso	Falso	Verdadero
Quito	Quito	27	Femenino	UCE	Turismo Histórico Cultural	4-6	SARS-COV-2	Creado en laboratorio	Una entidad capaz de adaptarse y evolucionar	No estoy seguro/a	No estoy seguro/a	Verdadero	Verdadero	Verdadero	Falso	Falso	Verdadero	No estoy seguro/a	Verdadero	Verdadero	Verdadero	Verdadero	Verdadero	Verdadero	Falso	No estoy seguro/a	No estoy seguro/a	Falso	Falso	Falso	Verdadero	Falso	Falso	Verdadero
Quito	Quito	29	Masculino	UCE	Comunicación Social	7-9	SARS-COV-2	Creado en laboratorio	Una entidad capaz de adaptarse y evolucionar	11 - 20	Falso	Falso	Verdadero	Verdadero	No estoy seguro/a	Falso	Verdadero	Verdadero	Verdadero	Verdadero	Verdadero	Verdadero	Verdadero	Verdadero	Falso	No estoy seguro/a	Verdadero	Falso	Falso	Verdadero	Verdadero	Falso	Falso	Verdadero
Quito	Quito	23	Femenino	UCE	Psicología Clínica	4-6	SARS-COV-2	Creado en laboratorio	Una entidad capaz de adaptarse y evolucionar	11 - 20	Verdadero	Verdadero	Verdadero	Verdadero	Falso	Falso	Verdadero	Falso	Verdadero	Verdadero	Verdadero	Verdadero	Verdadero	Verdadero	No estoy seguro/a	Verdadero	Verdadero	Falso	Falso	No estoy seguro/a	Verdadero	Falso	Falso	Verdadero	Respecto a la pregunta de la transportación del virus por el aire creo que es un tanto ambigüa ya que se comprobó que si se transporta en el aire pero no por un tiempo prolongado, entonces es muy probable que uno puede confundirese.
Quito	Quito	23	Femenino	UCE	Política	9 en adelante	SARS-COV-2	Creado en laboratorio	Una entidad capaz de adaptarse y evolucionar	No estoy seguro/a	Verdadero	Verdadero	Verdadero	Verdadero	No estoy seguro/a	Falso	Verdadero	No estoy seguro/a	Verdadero	Verdadero	Verdadero	Verdadero	Verdadero	Verdadero	Verdadero	Verdadero	Verdadero	Falso	Falso	No estoy seguro/a	No estoy seguro/a	Falso	Falso	Verdadero
Sangolqui	Quito	23	Femenino	UCE	Psicología clínica	4-6	SARS-COV-2	Creado en laboratorio	Una entidad capaz de adaptarse y evolucionar	11 - 20	Falso	Verdadero	Verdadero	Verdadero	Falso	Falso	Verdadero	Verdadero	Verdadero	Verdadero	Verdadero	Falso	Verdadero	Verdadero	No estoy seguro/a	Verdadero	Verdadero	Falso	Falso	Verdadero	Falso	Falso	Falso	Verdadero
Quito	Quito	26	Femenino	UCE	Odontología	7-9	SARS-COV-2	De origen natural	Una entidad capaz de adaptarse y evolucionar	21 - 30	Verdadero	Falso	Verdadero	Verdadero	Falso	Falso	Verdadero	Falso	Verdadero	Verdadero	Verdadero	Verdadero	Falso	Verdadero	Falso	Verdadero	Falso	Verdadero	Falso	Falso	Verdadero	Falso	Falso	Verdadero
TABACUNDO	CAYAMBE	21	Femenino	UCE	DERECHO	4-6	COVID-19	Creado en laboratorio	Una entidad capaz de adaptarse y evolucionar	11 - 20	Falso	Verdadero	Falso	Verdadero	Verdadero	Falso	Verdadero	Verdadero	Verdadero	Verdadero	Verdadero	Verdadero	Verdadero	Verdadero	Falso	Falso	Verdadero	Falso	Falso	Verdadero	Verdadero	Falso	Verdadero	Verdadero
Quito	Quito	22	Masculino	UCE	Turismo Ecológico	7-9	SARS-COV-2	De origen natural	Una entidad capaz de adaptarse y evolucionar	1 - 10	Verdadero	Verdadero	Verdadero	Verdadero	Falso	Falso	Verdadero	Verdadero	Verdadero	Verdadero	Verdadero	Verdadero	Verdadero	Verdadero	Falso	Verdadero	Verdadero	Falso	Falso	Verdadero	Falso	Falso	Falso	Verdadero	Mi recomendación es que se tome en cuenta los remedios caseros como medicina efectiva ya que la mezcla de medicina tradicional y ancestral aporta a una lucha más efectiva.
QUITO	QUITO	24	Femenino	UCE	COMUNICACION	1-3	SARS-COV-2	Creado en laboratorio	Una entidad capaz de adaptarse y evolucionar	No estoy seguro/a	No estoy seguro/a	Verdadero	Verdadero	Verdadero	Falso	Falso	Verdadero	Verdadero	Verdadero	Verdadero	Verdadero	Verdadero	Verdadero	Falso	No estoy seguro/a	No estoy seguro/a	Verdadero	Falso	Falso	Verdadero	Verdadero	Falso	Falso	Verdadero
QUITO	QUITO	21	Femenino	UCE	TURISMO ECOLÓGICO	7-9	SARS-COV-2	Creado en laboratorio	Una entidad capaz de adaptarse y evolucionar	No estoy seguro/a	Verdadero	Verdadero	Verdadero	Verdadero	Falso	Falso	Verdadero	Falso	Verdadero	Verdadero	Verdadero	Verdadero	Verdadero	Verdadero	Falso	Falso	Verdadero	Falso	Falso	Verdadero	Verdadero	Falso	Falso	Verdadero
Quito	quito	27	Masculino	UCE	FCQ BQF	1-3	SARS-COV-2	De origen natural	No estoy seguro/a	1 - 10	Falso	Falso	Verdadero	No estoy seguro/a	No estoy seguro/a	No estoy seguro/a	No estoy seguro/a	Verdadero	Verdadero	Verdadero	Verdadero	Verdadero	Falso	Falso	No estoy seguro/a	No estoy seguro/a	No estoy seguro/a	Falso	Falso	No estoy seguro/a	Verdadero	verdadero	Falso	Verdadero
Ibarra	Ibarra	21	Masculino	UTN	Biotecnología	4-6	SARS-COV-2	De origen natural	Una entidad capaz de adaptarse y evolucionar	No estoy seguro/a	Verdadero	Verdadero	Verdadero	Verdadero	Verdadero	Falso	Verdadero	Verdadero	Verdadero	Verdadero	Verdadero	Verdadero	Verdadero	Verdadero	Falso	Falso	Verdadero	Falso	Falso	Falso	Verdadero	Falso	Falso	Verdadero
Quito	Ibarra	27	Masculino	UCE	Odontología	9 en adelante	SARS-COV-2	De origen natural	Una entidad capaz de adaptarse y evolucionar	1 - 10	Verdadero	Verdadero	Verdadero	Verdadero	Falso	Falso	Verdadero	No estoy seguro/a	Verdadero	Verdadero	Verdadero	Verdadero	Verdadero	Verdadero	Falso	Verdadero	Verdadero	Falso	Falso	Falso	Verdadero	Falso	Falso	Verdadero	Falencia en las preguntar falta más indagar sobre automedicación, bioseguridad..
Quito	Quito	20	Femenino	UCE	Derecho	4-6	COVID-19	No estoy seguro/a	Una entidad capaz de adaptarse y evolucionar	1 - 10	No estoy seguro/a	Falso	Verdadero	Verdadero	Falso	Falso	Verdadero	Falso	Verdadero	Verdadero	Verdadero	Verdadero	Verdadero	Verdadero	Falso	No estoy seguro/a	Verdadero	Falso	Falso	Falso	No estoy seguro/a	Falso	Falso	Verdadero
El Vergel Calle D	Quito	20	Femenino	UCE	Agronomía	1-3	SARS-COV-2	Creado en laboratorio	Una entidad capaz de adaptarse y evolucionar	51 - 100	Verdadero	Verdadero	Verdadero	Verdadero	Falso	Falso	Verdadero	Verdadero	Verdadero	Verdadero	Verdadero	Verdadero	Verdadero	Falso	Falso	No estoy seguro/a	Verdadero	No estoy seguro/a	verdadero	Verdadero	Falso	Falso	Falso	Verdadero
Quito	Quito	24	Masculino	UCE	Turismo	1-3	SARS-COV-2	Creado en laboratorio	Una entidad capaz de adaptarse y evolucionar	1 - 10	Verdadero	Verdadero	Verdadero	Verdadero	Falso	Falso	Verdadero	Falso	Verdadero	Falso	Verdadero	Verdadero	Verdadero	Verdadero	Falso	Verdadero	Verdadero	Falso	verdadero	Falso	Falso	Falso	Falso	Verdadero
Cuenca	Cuenca	19	Masculino	YACHAY	Educación en Ciencias Experimentales	4-6	SARS-COV-2	De origen natural	Una entidad capaz de adaptarse y evolucionar	No estoy seguro/a	Verdadero	No estoy seguro/a	Verdadero	Verdadero	Verdadero	Falso	No estoy seguro/a	Falso	Verdadero	Verdadero	Verdadero	Verdadero	Verdadero	Verdadero	Falso	Verdadero	Verdadero	Falso	verdadero	Falso	Verdadero	Falso	Falso	Verdadero
Tabacundo	Tabacundo	22	Femenino	UCE	Enfermería	1-3	COVID-19	Creado en laboratorio	Una entidad capaz de adaptarse y evolucionar	1 - 10	Verdadero	Verdadero	Verdadero	Verdadero	Verdadero	Falso	Verdadero	Verdadero	Verdadero	Verdadero	Verdadero	Verdadero	Verdadero	Verdadero	Falso	No estoy seguro/a	Verdadero	Falso	Falso	Verdadero	Falso	Falso	Falso	Verdadero	Me gusta esta encuesta porque se aprende más
Quito	Quito	19	Femenino	UCE	Educación en Básica modalidad online	1-3	SARS-COV-2	Creado en laboratorio	Una entidad capaz de adaptarse y evolucionar	51 - 100	Verdadero	Verdadero	Verdadero	Verdadero	Falso	Falso	Verdadero	Verdadero	Verdadero	Verdadero	Verdadero	Verdadero	Verdadero	Verdadero	No estoy seguro/a	Verdadero	Verdadero	Verdadero	verdadero	Verdadero	Verdadero	verdadero	Verdadero	Verdadero	Que tiempo de lo que te curas del Covib 19 puedes contagiar a los demás .
Ibarra	Ibarra	28	Masculino	UTN	Biotecnología	1-3	SARS-COV-2	De origen natural	Una entidad capaz de adaptarse y evolucionar	11 - 20	Falso	Verdadero	Verdadero	Verdadero	Falso	Falso	Verdadero	Verdadero	Verdadero	Verdadero	Verdadero	Verdadero	Verdadero	Verdadero	Falso	Falso	Verdadero	Falso	Falso	Falso	Verdadero	Falso	Falso	Verdadero
Otavalo	Otavalo	23	Masculino	YACHAY	Nanotecnología	1-3	SARS-COV-2	No estoy seguro/a	No estoy seguro/a	No estoy seguro/a	No estoy seguro/a	Verdadero	Verdadero	Verdadero	No estoy seguro/a	Falso	Verdadero	No estoy seguro/a	Verdadero	Verdadero	Verdadero	Verdadero	Verdadero	Verdadero	No estoy seguro/a	No estoy seguro/a	No estoy seguro/a	No estoy seguro/a	No estoy seguro/a	Verdadero	Falso	Falso	Falso	Verdadero
Ibarra	Ibarra	28	Masculino	UTN	Biotecnología	1-3	SARS-COV-2	De origen natural	Una entidad capaz de adaptarse y evolucionar	11 - 20	Falso	Verdadero	Verdadero	Verdadero	Falso	Falso	Verdadero	Verdadero	Verdadero	Verdadero	Verdadero	Verdadero	Verdadero	Verdadero	Falso	Falso	Verdadero	Falso	Falso	Falso	Verdadero	Falso	Falso	Verdadero
Quito	Quito	25	Femenino	UCE	Derecho	4-6	COVID-19	De origen natural	No estoy seguro/a	1 - 10	Verdadero	Verdadero	Verdadero	Verdadero	Verdadero	Falso	Verdadero	Verdadero	Verdadero	Verdadero	Verdadero	Verdadero	Verdadero	Verdadero	No estoy seguro/a	No estoy seguro/a	Falso	Falso	Falso	Verdadero	Verdadero	Falso	Falso	Verdadero
Quito	Quito	33	Femenino	UCE	Educación inicial	1-3	SARS-COV-2	De origen natural	No estoy seguro/a	41 - 50	Falso	Verdadero	Verdadero	Verdadero	Falso	Falso	Verdadero	Verdadero	Verdadero	Verdadero	Verdadero	Verdadero	Verdadero	Verdadero	Verdadero	Falso	Verdadero	Falso	verdadero	Verdadero	Verdadero	verdadero	Falso	Verdadero
QUITO	RIOBAMBA	31	Femenino	UCE	ENFERMERIA	7-9	SARS-COV-2	No estoy seguro/a	Una entidad capaz de adaptarse y evolucionar	1 - 10	Verdadero	Falso	Verdadero	Verdadero	Falso	Falso	Verdadero	Falso	Verdadero	Verdadero	Verdadero	Verdadero	Verdadero	Verdadero	Falso	Verdadero	Verdadero	Falso	Falso	Falso	Verdadero	Falso	Falso	Verdadero	LA PREVENCION ES UNA CLAVE PARA DISMINUIR LOS CONTAGIOS EN EL ECUADOR
Quito	Quito	26	Femenino	UCE	Odontologia	7-9	SARS-COV-2	No estoy seguro/a	Una entidad capaz de adaptarse y evolucionar	No estoy seguro/a	Verdadero	Verdadero	Verdadero	Verdadero	Falso	Falso	Verdadero	Falso	Verdadero	Verdadero	Verdadero	Verdadero	Verdadero	Verdadero	Falso	Verdadero	Verdadero	Falso	Falso	Verdadero	Falso	Falso	Falso	Verdadero
Quito	Quito	23	Femenino	UCE	Comunicación Social	7-9	SARS-COV-2	Creado en laboratorio	Un complot mediático	1 - 10	Verdadero	Verdadero	Verdadero	Verdadero	No estoy seguro/a	Falso	Verdadero	Verdadero	Verdadero	Verdadero	Verdadero	Verdadero	Verdadero	Verdadero	Falso	No estoy seguro/a	Verdadero	Falso	Falso	Verdadero	Verdadero	Falso	Falso	Verdadero
Quito	Quito	20	Femenino	UCE	Laboratorio Clínico	1-3	SARS-COV-2	Creado en laboratorio	Una entidad capaz de adaptarse y evolucionar	No estoy seguro/a	Verdadero	Verdadero	Verdadero	Verdadero	Falso	Falso	Verdadero	Falso	Verdadero	Verdadero	Verdadero	Verdadero	Verdadero	Verdadero	Falso	Verdadero	Verdadero	Falso	Falso	Verdadero	Verdadero	Falso	Falso	Verdadero
Quito	Quito	27	Masculino	UNIR	Neurociencias y Educación	9 en adelante	SARS-COV-2	De origen natural	Una entidad capaz de adaptarse y evolucionar	No estoy seguro/a	Falso	Verdadero	Verdadero	Verdadero	Falso	Falso	Verdadero	No estoy seguro/a	Verdadero	Verdadero	Verdadero	Verdadero	Verdadero	Verdadero	No estoy seguro/a	Falso	Falso	Falso	Falso	Falso	Verdadero	Falso	Falso	Verdadero	Muy interesante me hizo pensar
Quito	Quito	20	Femenino	UCE	Laboratorio Clínico	1-3	SARS-COV-2	Creado en laboratorio	Una entidad capaz de adaptarse y evolucionar	No estoy seguro/a	Verdadero	Verdadero	Verdadero	Verdadero	Falso	Falso	Verdadero	Falso	Verdadero	Verdadero	Verdadero	Verdadero	Verdadero	Verdadero	Falso	Verdadero	Verdadero	Falso	Falso	Verdadero	Verdadero	Falso	Falso	Verdadero
Quito	Quito	22	Femenino	UCE	Pedagogía de la Lengua y Literatura	7-9	SARS-COV-2	De origen natural	Un compuesto químico	No estoy seguro/a	No estoy seguro/a	Verdadero	Verdadero	Verdadero	Falso	Falso	Verdadero	Verdadero	Verdadero	Verdadero	Verdadero	Verdadero	Verdadero	Verdadero	No estoy seguro/a	No estoy seguro/a	No estoy seguro/a	Falso	No estoy seguro/a	Verdadero	Verdadero	Falso	Falso	Verdadero
Quito	Santo Domingo	21	Femenino	UCE	Pedagogía de la Historia y Ciencias Sociales	1-3	SARS-COV-2	No estoy seguro/a	Una entidad capaz de adaptarse y evolucionar	1 - 10	Falso	No estoy seguro/a	Verdadero	Verdadero	No estoy seguro/a	Falso	Verdadero	Falso	Verdadero	Verdadero	Verdadero	Verdadero	Verdadero	Verdadero	Verdadero	No estoy seguro/a	Falso	Falso	Falso	Verdadero	Verdadero	Falso	Falso	Verdadero
Quito	Quito	19	Femenino	UCE	Educación Básica	1-3	SARS-COV-2	Creado en laboratorio	Una entidad capaz de adaptarse y evolucionar	No estoy seguro/a	Verdadero	Verdadero	Verdadero	Verdadero	Falso	No estoy seguro/a	Verdadero	Falso	Verdadero	Verdadero	Verdadero	Verdadero	Verdadero	Verdadero	No estoy seguro/a	No estoy seguro/a	No estoy seguro/a	Falso	Falso	Falso	Verdadero	Falso	Falso	Verdadero
Quito	Puerto Quito	19	Masculino	UCE	Ingeniería Civil	1-3	SARS-COV-2	De origen natural	Una entidad capaz de adaptarse y evolucionar	1 - 10	Verdadero	Verdadero	Verdadero	Verdadero	Falso	Falso	Verdadero	Falso	Verdadero	Verdadero	Verdadero	Verdadero	Verdadero	Verdadero	Falso	No estoy seguro/a	Verdadero	Falso	Falso	No estoy seguro/a	Falso	Falso	Falso	Verdadero
Quito	Quito	20	Femenino	UCE	Atención Prehospitalaria	1-3	No estoy seguro/a	De origen natural	No estoy seguro/a	41 - 50	Falso	Verdadero	Verdadero	Verdadero	Falso	Falso	Verdadero	Verdadero	Verdadero	Verdadero	Verdadero	Verdadero	Verdadero	Verdadero	Falso	No estoy seguro/a	Verdadero	Falso	Falso	Verdadero	Verdadero	Falso	No estoy seguro/a	Verdadero	Me parece bien el hecho de dar información correcta sobre este virus para saber mejor la situacion en la que estamos.
Quito	Quito	20	Masculino	UCE	Ciencias de la computación	4-6	SARS-COV-2	De origen natural	Una entidad capaz de adaptarse y evolucionar	1 - 10	Verdadero	Verdadero	Verdadero	Verdadero	Falso	Falso	Verdadero	Falso	Verdadero	Verdadero	Verdadero	Verdadero	Verdadero	Verdadero	No estoy seguro/a	Verdadero	Verdadero	Verdadero	Falso	Falso	Verdadero	Falso	Falso	Verdadero
quito	quito	27	Femenino	UCE	ingenieria qimica	9 en adelante	SARS-COV-2	Creado en laboratorio	Una entidad capaz de adaptarse y evolucionar	No estoy seguro/a	Verdadero	Verdadero	Verdadero	Verdadero	Verdadero	Falso	Verdadero	Falso	Verdadero	Verdadero	Verdadero	Verdadero	Verdadero	Verdadero	Falso	Verdadero	Falso	No estoy seguro/a	Falso	Falso	Verdadero	Falso	Falso	Verdadero
Quito	Quito	26	Femenino	UCE	Psicología Industrial	4-6	SARS-COV-2	No estoy seguro/a	Una entidad capaz de adaptarse y evolucionar	11 - 20	Verdadero	Verdadero	Verdadero	Verdadero	Falso	Falso	Verdadero	Verdadero	Verdadero	Verdadero	Verdadero	Verdadero	Verdadero	Verdadero	No estoy seguro/a	Verdadero	Verdadero	Falso	Falso	Falso	Verdadero	Falso	Falso	Verdadero
Quito	Quito	18	Masculino	UCE	Economía	1-3	SARS-COV-2	Creado en laboratorio	Una entidad capaz de adaptarse y evolucionar	1 - 10	Verdadero	Falso	Verdadero	Verdadero	Falso	Falso	Verdadero	Falso	Verdadero	Verdadero	Verdadero	Verdadero	Verdadero	Verdadero	No estoy seguro/a	No estoy seguro/a	Verdadero	Verdadero	Falso	Falso	Verdadero	Falso	Falso	Verdadero
Gualaceo	CALCETA	21	Femenino	UCE	EDUCACIÓN BASICA	1-3	SARS-COV-2	De origen natural	Una entidad capaz de adaptarse y evolucionar	31 - 40	Falso	Verdadero	Verdadero	Verdadero	Falso	Falso	Verdadero	Falso	Verdadero	Verdadero	Verdadero	Verdadero	Verdadero	Verdadero	Falso	Falso	Verdadero	Falso	Falso	Falso	Verdadero	verdadero	Verdadero	Verdadero
Quito	Quito	32	Masculino	UCE	Laboratorio Clínico e Histotecnológico	7-9	SARS-COV-2	De origen natural	Una entidad capaz de adaptarse y evolucionar	1 - 10	Verdadero	Verdadero	Verdadero	Verdadero	Falso	Falso	Verdadero	No estoy seguro/a	Verdadero	Verdadero	Verdadero	Verdadero	Verdadero	Verdadero	Falso	Verdadero	Verdadero	Falso	Falso	No estoy seguro/a	Verdadero	Falso	Falso	Verdadero
Quito	Quito	20	Femenino	UCE	Educación básica	1-3	COVID-19	Creado en laboratorio	Un compuesto químico	51 - 100	Falso	Verdadero	Verdadero	Verdadero	Falso	Falso	Verdadero	Verdadero	Verdadero	Verdadero	Verdadero	Falso	Verdadero	Verdadero	Falso	No estoy seguro/a	Verdadero	Falso	Falso	Verdadero	Verdadero	Falso	Falso	Verdadero	Todos debemos cuidarnos debidamente, usar la mascarilla y gel antibacterial
Quito	Quito	25	Femenino	UCE	LaborAtorio clinico	9 en adelante	SARS-COV-2	Creado en laboratorio	Una entidad capaz de adaptarse y evolucionar	No estoy seguro/a	Verdadero	Verdadero	Verdadero	Verdadero	Falso	Falso	Verdadero	Verdadero	Verdadero	Verdadero	Verdadero	Verdadero	Verdadero	Verdadero	Falso	Verdadero	Verdadero	Falso	Falso	Verdadero	Verdadero	Falso	Falso	Verdadero
Gualaceo	Calceta	21	Masculino	Policía Nacional	Tecnico	9 en adelante	SARS-COV-2	De origen natural	Una entidad capaz de adaptarse y evolucionar	41 - 50	Verdadero	Verdadero	Verdadero	Verdadero	Falso	Falso	Falso	Falso	Verdadero	Verdadero	Verdadero	Verdadero	Verdadero	Verdadero	Falso	Falso	Verdadero	Falso	verdadero	Verdadero	Verdadero	Falso	Verdadero	Verdadero
Quito	Quito	18	Femenino	YACHAY	Nanotecnologia	1-3	SARS-COV-2	No estoy seguro/a	Una entidad capaz de adaptarse y evolucionar	No estoy seguro/a	Verdadero	Verdadero	Verdadero	Verdadero	No estoy seguro/a	Falso	Verdadero	Verdadero	Verdadero	Verdadero	Verdadero	Verdadero	Verdadero	Verdadero	No estoy seguro/a	No estoy seguro/a	Verdadero	Falso	Falso	No estoy seguro/a	Verdadero	Falso	Falso	Verdadero
Yanzatza	Yanzatza	20	Masculino	UCE	Medicina	1-3	COVID-19	Creado en laboratorio	Una entidad capaz de adaptarse y evolucionar	1 - 10	Falso	Verdadero	Verdadero	Verdadero	Falso	Falso	Verdadero	Falso	Verdadero	Verdadero	Verdadero	Verdadero	Verdadero	Verdadero	Falso	Verdadero	No estoy seguro/a	Falso	Falso	Verdadero	Falso	Falso	Falso	Verdadero	deberia haber una onvestigacion sobre el covid19 para informarnos
Puyo	Lago agrio	23	Femenino	Universidad Estatal Amazónica	Ingeniería ambiental	7-9	SARS-COV-2	No estoy seguro/a	Una entidad capaz de adaptarse y evolucionar	No estoy seguro/a	Verdadero	Verdadero	Verdadero	Verdadero	No estoy seguro/a	Falso	Verdadero	No estoy seguro/a	Verdadero	Verdadero	Verdadero	Verdadero	Verdadero	Verdadero	No estoy seguro/a	No estoy seguro/a	Falso	Verdadero	Falso	Verdadero	No estoy seguro/a	Falso	Falso	Verdadero
Quito	Quito	40	Masculino	UCE	Administracion de Empresas	9 en adelante	SARS-COV-2	Creado en laboratorio	Una entidad capaz de adaptarse y evolucionar	1 - 10	Falso	Verdadero	Verdadero	Verdadero	Falso	Falso	Verdadero	Falso	Verdadero	Verdadero	Verdadero	Verdadero	Verdadero	Verdadero	Falso	Verdadero	Verdadero	Falso	No estoy seguro/a	Falso	Verdadero	Falso	Falso	Verdadero
QUITO	QUITO	22	Masculino	UCE	ODONTOLOGÍA	9 en adelante	SARS-COV-2	Creado en laboratorio	Una entidad capaz de adaptarse y evolucionar	1 - 10	Falso	Verdadero	Verdadero	Verdadero	Falso	Falso	Verdadero	Falso	Verdadero	Verdadero	Verdadero	Verdadero	Verdadero	Verdadero	Falso	Verdadero	Verdadero	Falso	verdadero	Falso	Verdadero	Falso	Falso	Verdadero
Quito	Tulcán	24	Masculino	UCE	Psicología Industrial	9 en adelante	SARS-COV-2	De origen natural	Una entidad capaz de adaptarse y evolucionar	1 - 10	Falso	Verdadero	Verdadero	Verdadero	Falso	Falso	Verdadero	Falso	Falso	Verdadero	Verdadero	Verdadero	Verdadero	Verdadero	Falso	Verdadero	Verdadero	Falso	Falso	Falso	Verdadero	Falso	Falso	Verdadero
Quito	Quito	24	Femenino	UCE	Odontología	9 en adelante	SARS-COV-2	De origen natural	Una entidad capaz de adaptarse y evolucionar	1 - 10	Verdadero	Verdadero	Verdadero	Verdadero	No estoy seguro/a	Falso	Verdadero	Verdadero	Verdadero	Verdadero	Verdadero	Verdadero	Verdadero	Verdadero	No estoy seguro/a	Verdadero	Falso	Falso	Falso	Falso	Verdadero	Falso	Falso	Verdadero
Quito	Quito	24	Masculino	UCE	Ingeniería Agronómica	7-9	SARS-COV-2	De origen natural	Una entidad capaz de adaptarse y evolucionar	11 - 20	Verdadero	Verdadero	Verdadero	Verdadero	Falso	Falso	Verdadero	Falso	Verdadero	Verdadero	Verdadero	Verdadero	Verdadero	Verdadero	Falso	Verdadero	Verdadero	Falso	Falso	Falso	Falso	Falso	Falso	Verdadero
Guaranda	Guaranda	19	Masculino	UCE	Licenciatura en psicología clínica	1-3	SARS-COV-2	Creado en laboratorio	Un complot mediático	No estoy seguro/a	Falso	Verdadero	Falso	Verdadero	No estoy seguro/a	Falso	Falso	Falso	Verdadero	Verdadero	Verdadero	Verdadero	Verdadero	Verdadero	Falso	Verdadero	No estoy seguro/a	No estoy seguro/a	Falso	Verdadero	Verdadero	Falso	Falso	Verdadero
Quito	Riobamba	24	Masculino	UCE	Auditoris	7-9	SARS-COV-2	De origen natural	Una entidad capaz de adaptarse y evolucionar	1 - 10	Verdadero	Verdadero	Verdadero	Verdadero	Falso	Falso	Verdadero	Falso	Verdadero	Verdadero	Verdadero	Verdadero	Verdadero	Verdadero	No estoy seguro/a	Verdadero	Verdadero	Falso	Falso	Falso	Verdadero	Falso	Falso	Verdadero
Quito	Quito	26	Masculino	UCE	Ciencias Sociales	9 en adelante	SARS-COV-2	Creado en laboratorio	No estoy seguro/a	1 - 10	Verdadero	Verdadero	Verdadero	Verdadero	Falso	Falso	Verdadero	Falso	Verdadero	Verdadero	Falso	Verdadero	Verdadero	Verdadero	No estoy seguro/a	Falso	Verdadero	Falso	Falso	No estoy seguro/a	No estoy seguro/a	Falso	Falso	Verdadero
Quito	Quito	21	Femenino	UCE	Carrera de Educación Inicial	4-6	COVID-19	Creado en laboratorio	No estoy seguro/a	No estoy seguro/a	No estoy seguro/a	Verdadero	Verdadero	Verdadero	Falso	Falso	Verdadero	Falso	Verdadero	Verdadero	Verdadero	Verdadero	Verdadero	Verdadero	Falso	No estoy seguro/a	Verdadero	Falso	No estoy seguro/a	Falso	Verdadero	No estoy seguro/a	Falso	Verdadero
Quito	Quito	21	Femenino	UCE	Bioquímica y Farmacia	4-6	No estoy seguro/a	De origen natural	Una entidad capaz de adaptarse y evolucionar	1 - 10	No estoy seguro/a	Verdadero	Verdadero	Verdadero	Falso	Falso	Verdadero	Falso	Verdadero	Verdadero	Verdadero	Verdadero	Verdadero	Verdadero	Falso	Verdadero	No estoy seguro/a	Falso	Falso	Falso	No estoy seguro/a	Falso	Falso	Verdadero
San Gabriel	San Gabriel	22	Masculino	UTN	Agroindustrias	1-3	SARS-COV-2	De origen natural	Una entidad capaz de adaptarse y evolucionar	1 - 10	Verdadero	Verdadero	Verdadero	Verdadero	Falso	Falso	Verdadero	Falso	Verdadero	Verdadero	Verdadero	Verdadero	Verdadero	Verdadero	Falso	No estoy seguro/a	Verdadero	Falso	verdadero	Verdadero	Falso	Falso	Falso	Verdadero	Esta muy bien para saber que personas saben o no están al tanto sobre dicho virus
Quito	Quito	19	Femenino	UCE	Comunicación Social	1-3	SARS-COV-2	Creado en laboratorio	Un complot mediático	1 - 10	Verdadero	Verdadero	Verdadero	Verdadero	Falso	Falso	Verdadero	Falso	Verdadero	Verdadero	Verdadero	Verdadero	Verdadero	Verdadero	Falso	Falso	Verdadero	Falso	Falso	No estoy seguro/a	Falso	Falso	Falso	Verdadero
Quito	Loja	25	Femenino	UCE	Laboratorio Clínico	7-9	SARS-COV-2	No estoy seguro/a	Una entidad capaz de adaptarse y evolucionar	1 - 10	Falso	Verdadero	Falso	Verdadero	Falso	Falso	Verdadero	Verdadero	Verdadero	Verdadero	Verdadero	Verdadero	Verdadero	Verdadero	Falso	Verdadero	Verdadero	Falso	Falso	Falso	Verdadero	Falso	Falso	Verdadero
QUITO	LAGO AGRIO	23	Masculino	UCE	INGENIERIA CIVIL	7-9	SARS-COV-2	Creado en laboratorio	Una entidad capaz de adaptarse y evolucionar	No estoy seguro/a	Falso	Verdadero	Verdadero	Verdadero	Falso	Falso	Verdadero	Verdadero	Verdadero	Verdadero	Verdadero	Verdadero	Verdadero	Verdadero	Verdadero	Verdadero	Verdadero	Falso	Falso	Verdadero	Verdadero	Falso	Falso	Verdadero	Creo que falta preguntas sobre el plasma de personas recuperadas de virus y como este puede probablemente ayudar a curar el virus.
Quito	Quito	19	Femenino	UCE	Comunicación en linea	1-3	SARS-COV-2	Creado en laboratorio	No estoy seguro/a	No estoy seguro/a	Verdadero	Verdadero	Verdadero	Verdadero	Falso	Falso	Verdadero	No estoy seguro/a	Verdadero	Verdadero	Verdadero	Verdadero	Verdadero	Verdadero	Falso	No estoy seguro/a	No estoy seguro/a	Verdadero	Falso	Verdadero	Verdadero	Falso	Falso	Verdadero
Portoviejo	Portoviejo	20	Masculino	UCE	Medicina	4-6	SARS-COV-2	De origen natural	Una entidad capaz de adaptarse y evolucionar	1 - 10	Verdadero	Verdadero	Verdadero	Verdadero	Falso	Falso	Verdadero	Verdadero	Verdadero	Verdadero	Verdadero	Verdadero	Verdadero	Verdadero	No estoy seguro/a	Verdadero	Verdadero	Falso	Falso	Falso	Verdadero	Falso	Falso	Verdadero
Quito	Quito	23	Femenino	UCE	Comunicación Social	7-9	SARS-COV-2	Creado en laboratorio	Una entidad capaz de adaptarse y evolucionar	21 - 30	Verdadero	Verdadero	Verdadero	Verdadero	Falso	Falso	Verdadero	Verdadero	Verdadero	Verdadero	Verdadero	Falso	Verdadero	Verdadero	Falso	Verdadero	Falso	Falso	Falso	Verdadero	Falso	Falso	Falso	Verdadero	Mejorar el planteamiento de preguntas. Estan mal redactadas.
QUITO	QUITO	29	Femenino	UCE	ADMINISTRACIÓN DE EMPRESAS	4-6	SARS-COV-2	De origen natural	No estoy seguro/a	1 - 10	Verdadero	Verdadero	Verdadero	Verdadero	Falso	Falso	Verdadero	Verdadero	Verdadero	Verdadero	Verdadero	Verdadero	Verdadero	Verdadero	No estoy seguro/a	No estoy seguro/a	Verdadero	Falso	Falso	Verdadero	Verdadero	Falso	Falso	Verdadero
Quito	Quito	24	Masculino	UCE	Comunicacion Social	7-9	SARS-COV-2	Creado en laboratorio	No estoy seguro/a	No estoy seguro/a	Verdadero	Verdadero	Verdadero	Verdadero	Falso	Falso	Verdadero	No estoy seguro/a	Verdadero	Verdadero	Verdadero	Verdadero	Verdadero	No estoy seguro/a	No estoy seguro/a	No estoy seguro/a	Verdadero	Falso	No estoy seguro/a	Verdadero	Verdadero	Falso	Falso	Verdadero	No hay preguntas abiertas. Yo pase el virus, nos infectamos con mi familia, y nunca preguntan que se puede hacer para ayudar
Quito	Quito	26	Femenino	UCE	Ciencias Biológicas y Ambientales	7-9	SARS-COV-2	Creado en laboratorio	Una entidad capaz de adaptarse y evolucionar	11 - 20	No estoy seguro/a	No estoy seguro/a	Verdadero	Verdadero	Falso	Falso	Verdadero	Verdadero	Verdadero	Verdadero	Verdadero	Verdadero	Verdadero	Verdadero	Falso	Verdadero	Verdadero	Falso	Falso	No estoy seguro/a	Verdadero	Falso	Falso	Verdadero
Quito	Quito	18	Femenino	UCE	Artes escenicas	1-3	SARS-COV-2	De origen natural	Una entidad capaz de adaptarse y evolucionar	31 - 40	Falso	Verdadero	Verdadero	Verdadero	Falso	Falso	Verdadero	Verdadero	Verdadero	Verdadero	Verdadero	Verdadero	Verdadero	Verdadero	Falso	No estoy seguro/a	Verdadero	Falso	verdadero	Verdadero	Verdadero	Falso	Falso	Verdadero
Quito	Quito	23	Femenino	UCE	Arquitectura y Urbanismo	7-9	SARS-COV-2	No estoy seguro/a	Una entidad capaz de adaptarse y evolucionar	1 - 10	Verdadero	Verdadero	Verdadero	Verdadero	Falso	Falso	Verdadero	Verdadero	Verdadero	Verdadero	Verdadero	Verdadero	Verdadero	Verdadero	No estoy seguro/a	No estoy seguro/a	Verdadero	Falso	No estoy seguro/a	No estoy seguro/a	No estoy seguro/a	Falso	Falso	Verdadero
Quito	Quito	23	Femenino	UCE	Biologia	4-6	SARS-COV-2	No estoy seguro/a	Una entidad capaz de adaptarse y evolucionar	No estoy seguro/a	Verdadero	Verdadero	Verdadero	Verdadero	Falso	Falso	Verdadero	Falso	No estoy seguro/a	Verdadero	Verdadero	Verdadero	Verdadero	Verdadero	Falso	Verdadero	Verdadero	Falso	Falso	Falso	Verdadero	Falso	Falso	Verdadero
OTAVALO	OTAVALO	20	Femenino	UCE	MEDICINA	1-3	SARS-COV-2	Creado en laboratorio	Una entidad capaz de adaptarse y evolucionar	No estoy seguro/a	Falso	Verdadero	Verdadero	Verdadero	Falso	Falso	Verdadero	Falso	Verdadero	Verdadero	Verdadero	Verdadero	Verdadero	Verdadero	Verdadero	No estoy seguro/a	No estoy seguro/a	Falso	Falso	No estoy seguro/a	Verdadero	Falso	Falso	Verdadero
Quito	Quito	22	Masculino	UDLA	Administración	1-3	SARS-COV-2	De origen natural	Una entidad capaz de adaptarse y evolucionar	1 - 10	Verdadero	Verdadero	Verdadero	Verdadero	Falso	Falso	Verdadero	No estoy seguro/a	Verdadero	Verdadero	Verdadero	Verdadero	Verdadero	Verdadero	Falso	Verdadero	Verdadero	Falso	Falso	No estoy seguro/a	Verdadero	Falso	No estoy seguro/a	Verdadero
Quito	Quito	24	Masculino	UCE	Química	7-9	SARS-COV-2	De origen natural	Una entidad capaz de adaptarse y evolucionar	21 - 30	No estoy seguro/a	Falso	Verdadero	Verdadero	Falso	Falso	Verdadero	Falso	Verdadero	Verdadero	Verdadero	Verdadero	Verdadero	Verdadero	Verdadero	Verdadero	Verdadero	Falso	Falso	No estoy seguro/a	Falso	Falso	Falso	Verdadero
QUITO	QUITO	27	Masculino	UCE	ADM EMPRESAS	7-9	SARS-COV-2	Creado en laboratorio	Una entidad capaz de adaptarse y evolucionar	1 - 10	Falso	Verdadero	Verdadero	Verdadero	No estoy seguro/a	Falso	Verdadero	Falso	Verdadero	Verdadero	Verdadero	Verdadero	Verdadero	Verdadero	No estoy seguro/a	Verdadero	Verdadero	Falso	Falso	Verdadero	Verdadero	Falso	Falso	Verdadero	NINGUNA
Quito	Quito	19	Masculino	UCE	Agronomía	1-3	SARS-COV-2	Creado en laboratorio	No estoy seguro/a	1 - 10	Falso	Verdadero	Verdadero	Verdadero	Falso	Falso	Verdadero	Verdadero	Verdadero	Verdadero	Verdadero	Verdadero	Verdadero	Verdadero	No estoy seguro/a	Verdadero	Verdadero	Verdadero	Falso	Falso	Verdadero	Falso	Falso	Verdadero
Quito	Quito	28	Femenino	UCE	arquitectura	7-9	SARS-COV-2	Creado en laboratorio	Una entidad capaz de adaptarse y evolucionar	1 - 10	Verdadero	Verdadero	Verdadero	Verdadero	Falso	No estoy seguro/a	Verdadero	Verdadero	Verdadero	Verdadero	Verdadero	Verdadero	Verdadero	Verdadero	Falso	No estoy seguro/a	Verdadero	Falso	Falso	Verdadero	Verdadero	Falso	Falso	Verdadero
Quito	Quito	42	Femenino	UCE	Administracion	9 en adelante	SARS-COV-2	De origen natural	Una entidad capaz de adaptarse y evolucionar	1 - 10	Falso	Verdadero	Verdadero	Verdadero	No estoy seguro/a	Falso	Verdadero	Falso	Verdadero	Verdadero	Verdadero	Verdadero	Verdadero	Verdadero	No estoy seguro/a	No estoy seguro/a	Verdadero	Falso	No estoy seguro/a	Verdadero	Verdadero	Falso	Falso	Verdadero
Quito	Quito	23	Masculino	UCE	Medicina	9 en adelante	SARS-COV-2	De origen natural	Una entidad capaz de adaptarse y evolucionar	1 - 10	Verdadero	Verdadero	Verdadero	Verdadero	Falso	Falso	Verdadero	Falso	Verdadero	Verdadero	Verdadero	Verdadero	Verdadero	Verdadero	Falso	Verdadero	Verdadero	Falso	Falso	Verdadero	Verdadero	Falso	Falso	Verdadero
Quito	Quito	23	Masculino	UCE	Medicina	9 en adelante	SARS-COV-2	De origen natural	Una entidad capaz de adaptarse y evolucionar	1 - 10	Verdadero	Verdadero	Verdadero	Verdadero	Falso	Falso	Verdadero	Falso	Verdadero	Verdadero	Verdadero	Verdadero	Verdadero	Verdadero	Falso	Verdadero	Verdadero	Falso	Falso	Verdadero	Verdadero	Falso	Falso	Verdadero
Cantón Mejía parroquia Aloag	Quito	29	Masculino	UCE	Pedagogía en informática	7-9	SARS-COV-2	Creado en laboratorio	Una entidad capaz de adaptarse y evolucionar	31 - 40	Verdadero	Verdadero	Verdadero	Verdadero	Falso	Falso	Verdadero	No estoy seguro/a	Verdadero	Verdadero	Verdadero	Verdadero	Verdadero	Verdadero	Falso	Verdadero	Falso	Verdadero	Falso	Verdadero	Verdadero	Falso	Verdadero	Verdadero	Adicionar porfavor que las medidas de. Prevención deben ser la prioridad ante este problema mundial. Que vivimos hoy en día.
Sangolqui	Quito	21	Masculino	UCE	Biología	1-3	SARS-COV-2	De origen natural	Una entidad capaz de adaptarse y evolucionar	No estoy seguro/a	Falso	Verdadero	Verdadero	Verdadero	Falso	Falso	Verdadero	Verdadero	Verdadero	Verdadero	Verdadero	Verdadero	Verdadero	Verdadero	No estoy seguro/a	Verdadero	Verdadero	Falso	Falso	Falso	Verdadero	Falso	Falso	Verdadero
quito	quito	26	Femenino	UCE	administracion de empresas	7-9	COVID-19	Creado en laboratorio	Un compuesto químico	41 - 50	Falso	Verdadero	Verdadero	Verdadero	Falso	Falso	Verdadero	Verdadero	Verdadero	Verdadero	Verdadero	Verdadero	Verdadero	Verdadero	Falso	No estoy seguro/a	Verdadero	Falso	Falso	Verdadero	Verdadero	Falso	Falso	Verdadero
ibarra	ibarra	29	Masculino	UCE	Administracion de empresas	7-9	COVID-19	De origen natural	Una entidad capaz de adaptarse y evolucionar	No estoy seguro/a	Falso	Verdadero	Falso	Verdadero	Verdadero	Falso	Verdadero	Falso	Verdadero	Verdadero	Verdadero	Verdadero	Verdadero	Verdadero	Falso	Falso	Verdadero	Falso	Falso	Falso	Falso	Falso	Falso	Verdadero	buena iniciativa pero se debe socializar de acuerdo a las respuestas obtenidas
Quito	Quito	18	Femenino	UCE	Finanzas	1-3	SARS-COV-2	De origen natural	Una entidad capaz de adaptarse y evolucionar	51 - 100	Verdadero	Verdadero	Verdadero	Verdadero	Falso	Falso	Verdadero	No estoy seguro/a	Verdadero	Verdadero	Verdadero	Verdadero	Verdadero	Verdadero	No estoy seguro/a	Verdadero	Verdadero	Falso	Falso	No estoy seguro/a	Falso	Falso	Falso	Verdadero
Cayambe	Ibarra	24	Masculino	YACHAY	Tecnologías de la Información	9 en adelante	SARS-COV-2	De origen natural	Una entidad capaz de adaptarse y evolucionar	11 - 20	Verdadero	Verdadero	Verdadero	Verdadero	Falso	Falso	Verdadero	No estoy seguro/a	Verdadero	Verdadero	Verdadero	Verdadero	Verdadero	Verdadero	No estoy seguro/a	No estoy seguro/a	No estoy seguro/a	Falso	Falso	Falso	Verdadero	Falso	Falso	Verdadero
Esmeraldas	Esmeraldas	19	Masculino	YACHAY	Fisica	4-6	SARS-COV-2	De origen natural	Una entidad capaz de adaptarse y evolucionar	11 - 20	No estoy seguro/a	Verdadero	Verdadero	Verdadero	Falso	Falso	Verdadero	Falso	Verdadero	Verdadero	Verdadero	Verdadero	Verdadero	Verdadero	Falso	Verdadero	Verdadero	Falso	Falso	No estoy seguro/a	Verdadero	Falso	Falso	Verdadero
Riobamba	Guaranda	20	Femenino	YACHAY	Química	4-6	SARS-COV-2	De origen natural	Una entidad capaz de adaptarse y evolucionar	11 - 20	Falso	Verdadero	Verdadero	Verdadero	Falso	Falso	Verdadero	Falso	Verdadero	Verdadero	Verdadero	Verdadero	Verdadero	Verdadero	No estoy seguro/a	Verdadero	Verdadero	Falso	Falso	Verdadero	Verdadero	Falso	Falso	Verdadero
Sangolqui	Sangolqui	20	Femenino	YACHAY	Biología	4-6	SARS-COV-2	Creado en laboratorio	Una entidad capaz de adaptarse y evolucionar	51 - 100	No estoy seguro/a	Verdadero	Verdadero	Verdadero	Falso	Falso	Verdadero	No estoy seguro/a	Verdadero	Verdadero	Verdadero	Verdadero	Verdadero	Verdadero	Falso	No estoy seguro/a	Verdadero	Falso	Falso	Verdadero	Verdadero	Falso	Verdadero	Verdadero
Cuenca	Cuenca	21	Masculino	YACHAY	Nanotecnologia	4-6	SARS-COV-2	Creado en laboratorio	Una entidad capaz de adaptarse y evolucionar	1 - 10	Verdadero	Verdadero	Verdadero	Verdadero	Falso	Falso	Verdadero	Falso	Verdadero	Verdadero	Verdadero	Verdadero	Verdadero	Verdadero	Falso	Verdadero	Verdadero	Falso	Falso	Falso	Verdadero	Falso	Falso	Verdadero
Quito	Quito	18	Femenino	YACHAY	Quimica	1-3	SARS-COV-2	No estoy seguro/a	Una entidad capaz de adaptarse y evolucionar	No estoy seguro/a	Verdadero	Verdadero	Verdadero	Verdadero	Falso	Falso	Verdadero	Falso	No estoy seguro/a	Verdadero	Verdadero	Verdadero	Verdadero	Verdadero	No estoy seguro/a	No estoy seguro/a	Falso	Falso	Falso	No estoy seguro/a	Verdadero	Falso	No estoy seguro/a	Verdadero
Urcuquí	Riobamba	22	Masculino	YACHAY	Ingeniería Biomédica	9 en adelante	SARS-COV-2	De origen natural	Una entidad capaz de adaptarse y evolucionar	11 - 20	Falso	Verdadero	Verdadero	Verdadero	Falso	Falso	Verdadero	Verdadero	Verdadero	Verdadero	Verdadero	Verdadero	Verdadero	Verdadero	Falso	Verdadero	Verdadero	Falso	Falso	Verdadero	Verdadero	Falso	Falso	Verdadero
Machala	Madrid - España	18	Masculino	YACHAY	Física	1-3	SARS-COV-2	De origen natural	Una entidad capaz de adaptarse y evolucionar	No estoy seguro/a	Verdadero	Verdadero	Verdadero	Verdadero	No estoy seguro/a	Falso	Verdadero	Verdadero	Verdadero	Verdadero	Verdadero	Verdadero	No estoy seguro/a	Verdadero	Falso	Verdadero	Verdadero	Falso	Falso	No estoy seguro/a	Falso	Falso	Falso	Verdadero
Ibarra	Ibarra	24	Femenino	YACHAY	Química	9 en adelante	SARS-COV-2	De origen natural	No estoy seguro/a	1 - 10	Verdadero	Verdadero	Verdadero	Verdadero	Falso	Falso	Verdadero	Falso	Verdadero	Verdadero	Verdadero	Verdadero	Verdadero	Verdadero	Falso	Verdadero	Verdadero	Falso	Falso	No estoy seguro/a	Verdadero	Falso	Falso	Verdadero
Quito	Quito	23	Femenino	YACHAY	Ingeniería en Nanotecnología	9 en adelante	SARS-COV-2	De origen natural	Una entidad capaz de adaptarse y evolucionar	No estoy seguro/a	Verdadero	Verdadero	Verdadero	Verdadero	Falso	Falso	No estoy seguro/a	Verdadero	Verdadero	Verdadero	Verdadero	Verdadero	Verdadero	Verdadero	Falso	Verdadero	Verdadero	Falso	Falso	No estoy seguro/a	Verdadero	Falso	Falso	Verdadero
Quito	Esmeraldas	20	Masculino	YACHAY	Matematicas	4-6	SARS-COV-2	Creado en laboratorio	Una entidad capaz de adaptarse y evolucionar	31 - 40	Verdadero	Verdadero	Verdadero	Verdadero	Falso	Falso	Verdadero	Falso	Verdadero	Verdadero	Verdadero	Verdadero	Verdadero	Verdadero	No estoy seguro/a	Verdadero	Verdadero	Falso	Falso	Falso	Verdadero	Falso	Falso	Verdadero
Cuenca	Loja	23	Masculino	YACHAY	Tecnologías de la información	9 en adelante	SARS-COV-2	De origen natural	Una entidad capaz de adaptarse y evolucionar	1 - 10	Falso	No estoy seguro/a	Verdadero	Verdadero	Falso	Falso	Verdadero	No estoy seguro/a	No estoy seguro/a	Verdadero	Verdadero	Verdadero	Verdadero	Verdadero	No estoy seguro/a	Verdadero	Verdadero	Falso	Falso	Verdadero	Falso	Falso	Falso	Verdadero
Esmeraldas	Quito	21	Femenino	YACHAY	Nanotecnología	1-3	SARS-COV-2	Creado en laboratorio	Un complot mediático	51 - 100	Falso	Verdadero	Verdadero	Verdadero	No estoy seguro/a	Falso	Verdadero	No estoy seguro/a	Verdadero	Verdadero	Verdadero	Verdadero	Verdadero	Verdadero	Falso	Verdadero	Verdadero	Falso	Falso	Verdadero	Falso	Falso	No estoy seguro/a	Verdadero
Urcuquí	Quito	21	Femenino	YACHAY	Química	4-6	SARS-COV-2	De origen natural	Una entidad capaz de adaptarse y evolucionar	1 - 10	No estoy seguro/a	Verdadero	Verdadero	Verdadero	Falso	Falso	Verdadero	Verdadero	Verdadero	Verdadero	Verdadero	Verdadero	Verdadero	Verdadero	Falso	No estoy seguro/a	Verdadero	Falso	Falso	No estoy seguro/a	Verdadero	Falso	Falso	Verdadero
Guayaquil	Guayaquil	21	Femenino	YACHAY	Biología	4-6	SARS-COV-2	De origen natural	Una entidad capaz de adaptarse y evolucionar	31 - 40	Falso	Verdadero	Verdadero	Verdadero	Falso	Falso	Verdadero	Falso	Verdadero	Verdadero	Verdadero	Verdadero	Verdadero	Verdadero	Falso	Verdadero	Falso	Falso	Falso	Falso	Verdadero	Falso	Verdadero	Verdadero	Ha sido una encuesta interesante, con detalles que deconocia pero que en su mayoria son preguntas que la gente deberia conocer sus respuestas correctas. Un añadido muy bueno podría ser los sintomas que a algunas personas les da después de haber tenido el virus; en lo personal, siento que es algo que le da a todas las personas que se infectaron con el Virus
QUITO	Quito	28	Femenino	YACHAY	Biología	9 en adelante	SARS-COV-2	De origen natural	Una entidad capaz de adaptarse y evolucionar	No estoy seguro/a	Verdadero	Verdadero	Verdadero	Verdadero	Verdadero	Falso	Verdadero	Falso	Verdadero	Verdadero	Verdadero	Verdadero	Verdadero	Verdadero	Falso	Verdadero	Verdadero	Falso	Falso	Falso	Verdadero	Falso	Verdadero	Verdadero
Quito	Quito	20	Femenino	YACHAY	Nanotecnología	4-6	SARS-COV-2	No estoy seguro/a	Una entidad capaz de adaptarse y evolucionar	1 - 10	No estoy seguro/a	Verdadero	Verdadero	Verdadero	No estoy seguro/a	Falso	Verdadero	Verdadero	Verdadero	Verdadero	Verdadero	Verdadero	Verdadero	Verdadero	Falso	No estoy seguro/a	Falso	Falso	Falso	Falso	No estoy seguro/a	Falso	Falso	Verdadero
Ambato	Ambato	19	Femenino	YACHAY	Biomedicina	4-6	SARS-COV-2	Creado en laboratorio	Una entidad capaz de adaptarse y evolucionar	51 - 100	Falso	Verdadero	Verdadero	Verdadero	Falso	Verdadero	Verdadero	Verdadero	Verdadero	Verdadero	Verdadero	Verdadero	Verdadero	Verdadero	Verdadero	Verdadero	Verdadero	Falso	Falso	Verdadero	Verdadero	Falso	Falso	Verdadero	Interesante encuesta!
Ambato	Ambato	22	Femenino	YACHAY	Matemáticas	9 en adelante	SARS-COV-2	De origen natural	Una entidad capaz de adaptarse y evolucionar	No estoy seguro/a	No estoy seguro/a	Verdadero	Verdadero	Verdadero	No estoy seguro/a	Falso	Verdadero	Falso	Verdadero	Falso	Verdadero	Verdadero	Verdadero	Verdadero	No estoy seguro/a	No estoy seguro/a	No estoy seguro/a	Falso	Falso	Verdadero	Falso	Falso	Falso	Verdadero
Quito	Quito	26	Masculino	YACHAY	Ing en T.I	9 en adelante	SARS-COV-2	De origen natural	Una entidad capaz de adaptarse y evolucionar	No estoy seguro/a	Falso	Verdadero	Verdadero	Verdadero	Falso	Falso	No estoy seguro/a	Verdadero	Verdadero	Verdadero	Verdadero	Verdadero	Verdadero	Verdadero	Falso	Verdadero	No estoy seguro/a	Falso	Falso	Falso	Verdadero	Falso	Falso	Verdadero
Quito	Tabacundo	25	Masculino	YACHAY	Matemáticas	9 en adelante	SARS-COV-2	De origen natural	Una entidad capaz de adaptarse y evolucionar	1 - 10	Falso	Falso	Verdadero	Verdadero	Falso	Falso	Verdadero	No estoy seguro/a	Verdadero	Verdadero	Verdadero	Verdadero	Verdadero	Verdadero	Falso	No estoy seguro/a	Verdadero	Falso	Falso	Falso	Verdadero	Falso	Falso	Verdadero
Machala	Machala	19	Femenino	YACHAY	Biomedicina	4-6	No estoy seguro/a	De origen natural	Una entidad capaz de adaptarse y evolucionar	No estoy seguro/a	Verdadero	Verdadero	Verdadero	Verdadero	Falso	Falso	Falso	Verdadero	Verdadero	Verdadero	Verdadero	Verdadero	Verdadero	Verdadero	Verdadero	No estoy seguro/a	No estoy seguro/a	Falso	Falso	Verdadero	Verdadero	Falso	Falso	Verdadero
IBARRA	IBARRA	29	Masculino	YACHAY	FISICA	1-3	SARS-COV-2	De origen natural	Una entidad capaz de adaptarse y evolucionar	1 - 10	Verdadero	Verdadero	Verdadero	Verdadero	Falso	Falso	Verdadero	Falso	Verdadero	Verdadero	Verdadero	Verdadero	Verdadero	Verdadero	No estoy seguro/a	Verdadero	Verdadero	Falso	Falso	No estoy seguro/a	Falso	No estoy seguro/a	Falso	Verdadero
Guayaquil	Guayaquil	24	Masculino	YACHAY	Nanotecnologia	9 en adelante	SARS-COV-2	Creado en laboratorio	Una entidad capaz de adaptarse y evolucionar	41 - 50	Verdadero	Verdadero	Verdadero	Verdadero	Falso	Falso	Verdadero	No estoy seguro/a	Verdadero	Verdadero	Verdadero	Verdadero	Verdadero	Verdadero	No estoy seguro/a	Verdadero	Verdadero	Falso	Falso	Verdadero	Verdadero	Falso	Verdadero	Verdadero
LOJA	LOJA	23	Masculino	YACHAY	PETROQUÍMICA	9 en adelante	SARS-COV-2	De origen natural	Una entidad capaz de adaptarse y evolucionar	No estoy seguro/a	Verdadero	Verdadero	Verdadero	Verdadero	Falso	Falso	Verdadero	Falso	Verdadero	Verdadero	Verdadero	Verdadero	Verdadero	Verdadero	No estoy seguro/a	No estoy seguro/a	No estoy seguro/a	Falso	Falso	Verdadero	Verdadero	No estoy seguro/a	Falso	Verdadero
Cuenca	Cuenca	23	Femenino	YACHAY	Química	9 en adelante	SARS-COV-2	De origen natural	Una entidad capaz de adaptarse y evolucionar	No estoy seguro/a	Verdadero	Verdadero	Verdadero	Verdadero	Falso	Falso	Verdadero	Falso	No estoy seguro/a	Verdadero	Verdadero	Verdadero	Verdadero	Verdadero	Falso	Verdadero	Verdadero	Falso	Falso	No estoy seguro/a	Verdadero	Falso	Falso	Verdadero
San Gabriel	San Gabriel	22	Femenino	YACHAY	Polìmeros	9 en adelante	SARS-COV-2	De origen natural	Una entidad capaz de adaptarse y evolucionar	1 - 10	Verdadero	Verdadero	Verdadero	Verdadero	Falso	Falso	Verdadero	Falso	Verdadero	Falso	Verdadero	Verdadero	Verdadero	Verdadero	Verdadero	Verdadero	Verdadero	Falso	Falso	Falso	Verdadero	Falso	Falso	Verdadero
Antonio Ante	Cotacachi	21	Femenino	YACHAY	Biología	7-9	SARS-COV-2	De origen natural	Una entidad capaz de adaptarse y evolucionar	No estoy seguro/a	Verdadero	Verdadero	Verdadero	Verdadero	Falso	Falso	Verdadero	Falso	Verdadero	Verdadero	Verdadero	Verdadero	Falso	Verdadero	Verdadero	Verdadero	Verdadero	Falso	Falso	Falso	Verdadero	Falso	Falso	Verdadero	Pienso que deberían preguntar si sabemos cómo funciona una vacuna, cuáles son las fases para obtener una y que tan importantes son cumplir los protocolos y recibir el aval internacional
Quito	Quito	21	Femenino	YACHAY	Matemática	4-6	SARS-COV-2	De origen natural	Una entidad capaz de adaptarse y evolucionar	No estoy seguro/a	Falso	Falso	Verdadero	Verdadero	Falso	Falso	Verdadero	Falso	Verdadero	Verdadero	Verdadero	Verdadero	Verdadero	Verdadero	No estoy seguro/a	No estoy seguro/a	Falso	Falso	Falso	Verdadero	Verdadero	Falso	Falso	Verdadero
Quito	Quito	22	Femenino	YACHAY	Química	4-6	SARS-COV-2	De origen natural	Una entidad capaz de adaptarse y evolucionar	No estoy seguro/a	Verdadero	Verdadero	Verdadero	Verdadero	Falso	Falso	Verdadero	Falso	Verdadero	Verdadero	Verdadero	Verdadero	Verdadero	Verdadero	Verdadero	Verdadero	Verdadero	Falso	Falso	Verdadero	Verdadero	verdadero	Falso	Verdadero
Ambato	Ambato	20	Masculino	YACHAY	Química	4-6	SARS-COV-2	De origen natural	Una entidad capaz de adaptarse y evolucionar	1 - 10	Verdadero	Verdadero	Verdadero	Verdadero	Falso	Falso	Verdadero	No estoy seguro/a	Verdadero	Verdadero	Verdadero	Verdadero	Verdadero	Verdadero	Falso	Verdadero	Verdadero	Falso	Falso	No estoy seguro/a	Falso	No estoy seguro/a	Falso	Verdadero
Urcuqui	Azogues	21	Femenino	YACHAY	Quimica	7-9	SARS-COV-2	De origen natural	Una entidad capaz de adaptarse y evolucionar	1 - 10	Verdadero	Verdadero	Verdadero	Verdadero	Falso	Falso	Verdadero	No estoy seguro/a	Verdadero	Verdadero	Verdadero	Verdadero	Verdadero	Verdadero	Falso	Verdadero	Verdadero	Falso	Falso	Verdadero	Verdadero	Falso	Falso	Verdadero
Tulcán	Tulcán	18	Femenino	YACHAY	Quimica	1-3	SARS-COV-2	Creado en laboratorio	Un compuesto químico	41 - 50	Falso	Verdadero	Verdadero	Verdadero	Falso	Falso	Verdadero	Verdadero	Verdadero	Verdadero	Verdadero	Verdadero	Verdadero	Verdadero	Falso	No estoy seguro/a	Falso	Falso	Falso	Verdadero	Verdadero	No estoy seguro/a	Falso	Verdadero
Santo Domingo	Guayaquil	17	Masculino	YACHAY	Física	1-3	SARS-COV-2	Creado en laboratorio	Una entidad capaz de adaptarse y evolucionar	1 - 10	Verdadero	Verdadero	Verdadero	Verdadero	Falso	Falso	Verdadero	Verdadero	Verdadero	Verdadero	Verdadero	Verdadero	Falso	Verdadero	Verdadero	Falso	Verdadero	Falso	Falso	Verdadero	Verdadero	Falso	Falso	Verdadero	La forma como podríamos obtener la vacuna seria extrayendo células madre de pacientes anteriormente infectados del virus pero libres del virus, este plasma se les pondría a otra persona haciéndose inmune al virus, estas células madres se adaptan al nuevo cuerpo protegiendo del covid gracia a su información antes obtenida del virus
Montecristi	Montecristi	20	Femenino	YACHAY	Nanotecnología	4-6	SARS-COV-2	De origen natural	Una entidad capaz de adaptarse y evolucionar	1 - 10	Verdadero	No estoy seguro/a	Verdadero	Verdadero	Falso	Falso	Verdadero	Verdadero	Verdadero	Verdadero	Verdadero	Verdadero	Verdadero	Verdadero	No estoy seguro/a	Verdadero	No estoy seguro/a	Falso	Falso	No estoy seguro/a	No estoy seguro/a	Falso	Falso	Verdadero
El Guabo - El Oro	El guabo - El Oro	18	Femenino	YACHAY	NANOTECNOLOGIA	1-3	SARS-COV-2	Creado en laboratorio	Un complot mediático	51 - 100	No estoy seguro/a	Verdadero	Verdadero	Verdadero	Falso	Falso	Verdadero	Verdadero	Verdadero	Verdadero	Verdadero	No estoy seguro/a	Verdadero	Verdadero	No estoy seguro/a	Falso	Verdadero	Falso	No estoy seguro/a	No estoy seguro/a	Verdadero	Falso	Falso	Verdadero
Ibarra	Quito	23	Femenino	YACHAY	Biologia	9 en adelante	SARS-COV-2	De origen natural	Una entidad capaz de adaptarse y evolucionar	No estoy seguro/a	Verdadero	Verdadero	Verdadero	Verdadero	Falso	Falso	Verdadero	Verdadero	Verdadero	Verdadero	Verdadero	Verdadero	Verdadero	Verdadero	Falso	Verdadero	Verdadero	Falso	Falso	Verdadero	Verdadero	Falso	Verdadero	Verdadero
Guayaquil	Guayaquil	18	Femenino	YACHAY	Agroindustria alimentaria	1-3	SARS-COV-2	Creado en laboratorio	Una entidad capaz de adaptarse y evolucionar	41 - 50	No estoy seguro/a	Verdadero	Verdadero	Verdadero	Falso	Falso	Verdadero	Verdadero	Verdadero	Verdadero	Verdadero	Verdadero	Verdadero	Verdadero	Falso	Verdadero	Verdadero	Verdadero	Falso	No estoy seguro/a	Falso	Falso	Falso	Verdadero	Las preguntas son precisas y concisas su estructura es la adecuada esta muy bien que puedan saber mas que tanto se conoce del Covid-19
Manta	Manta	17	Femenino	YACHAY	Biomedicina	1-3	COVID-19	De origen natural	Una entidad capaz de adaptarse y evolucionar	No estoy seguro/a	Verdadero	Verdadero	Verdadero	Verdadero	No estoy seguro/a	Falso	No estoy seguro/a	Verdadero	Verdadero	Verdadero	Verdadero	Verdadero	Verdadero	Verdadero	No estoy seguro/a	No estoy seguro/a	No estoy seguro/a	Falso	Falso	Verdadero	Falso	Falso	Falso	Verdadero
Quito	Guayaquil	27	Masculino	YACHAY	Fisica	9 en adelante	SARS-COV-2	De origen natural	Una entidad capaz de adaptarse y evolucionar	1 - 10	Verdadero	Verdadero	Verdadero	Verdadero	Falso	Falso	Verdadero	Falso	Verdadero	Verdadero	Verdadero	Verdadero	Verdadero	Verdadero	Falso	Verdadero	Verdadero	Falso	Falso	Falso	Verdadero	Falso	Falso	Verdadero
Cotacachi	Tosagua	19	Masculino	YACHAY	Nanotecnología	4-6	SARS-COV-2	De origen natural	Una entidad capaz de adaptarse y evolucionar	31 - 40	Falso	Verdadero	Verdadero	Verdadero	Verdadero	Falso	Verdadero	Verdadero	Verdadero	Verdadero	Verdadero	Verdadero	Verdadero	Verdadero	Falso	Verdadero	Falso	Falso	Falso	No estoy seguro/a	Falso	Falso	Verdadero	Falso
otavalo	Otavalo	24	Masculino	YACHAY	Quimica	1-3	COVID-19	Creado en laboratorio	Una entidad capaz de adaptarse y evolucionar	11 - 20	Verdadero	Verdadero	Verdadero	Verdadero	Falso	Falso	Verdadero	Falso	Verdadero	Verdadero	Verdadero	Verdadero	Verdadero	Verdadero	Falso	Verdadero	Verdadero	Falso	verdadero	Verdadero	Falso	Falso	Falso	Verdadero
Quito	San Gabriel	22	Femenino	UCE	Bioquímica y farmacia	1-3	SARS-COV-2	De origen natural	Una entidad capaz de adaptarse y evolucionar	1 - 10	Verdadero	Verdadero	Verdadero	Verdadero	Falso	Falso	Verdadero	Falso	Verdadero	Verdadero	Verdadero	Verdadero	Verdadero	Verdadero	Falso	Verdadero	Verdadero	Falso	Falso	Verdadero	Verdadero	verdadero	Falso	Falso
Quito	Quito	24	Femenino	UCE	Sociología	7-9	SARS-COV-2	No estoy seguro/a	Una entidad capaz de adaptarse y evolucionar	1 - 10	Verdadero	Verdadero	No estoy seguro/a	Verdadero	Falso	Falso	Verdadero	No estoy seguro/a	Verdadero	Verdadero	Verdadero	Verdadero	Verdadero	Verdadero	Verdadero	Verdadero	Verdadero	Falso	Falso	Falso	Verdadero	Falso	Falso	Verdadero
Loja	Loja	21	Masculino	YACHAY	Fisica	4-6	SARS-COV-2	No estoy seguro/a	Una entidad capaz de adaptarse y evolucionar	1 - 10	No estoy seguro/a	Verdadero	Verdadero	Verdadero	Falso	Falso	Verdadero	Falso	Verdadero	Verdadero	Verdadero	Verdadero	Verdadero	Verdadero	No estoy seguro/a	No estoy seguro/a	No estoy seguro/a	Falso	Falso	No estoy seguro/a	Verdadero	Falso	Falso	Verdadero	Muy Buena encuesta, esta te permite ver las cosas que aun no sabes sobre este tema, y te da motivacion a investigarlos.
Chone	Chone	17	Femenino	YACHAY	Biomedicina	1-3	COVID-19	De origen natural	No estoy seguro/a	11 - 20	Falso	Verdadero	Verdadero	Verdadero	No estoy seguro/a	Falso	No estoy seguro/a	Verdadero	Verdadero	Verdadero	Verdadero	Verdadero	Verdadero	Verdadero	No estoy seguro/a	No estoy seguro/a	Verdadero	Falso	Falso	Verdadero	Verdadero	Falso	No estoy seguro/a	Verdadero
Portoviejo	Portoviejo	18	Masculino	YACHAY	Biomedicina	1-3	SARS-COV-2	De origen natural	Una entidad capaz de adaptarse y evolucionar	1 - 10	Falso	Verdadero	Verdadero	Verdadero	Falso	Falso	Verdadero	Verdadero	Verdadero	Verdadero	Verdadero	Verdadero	Verdadero	Verdadero	Verdadero	Verdadero	Verdadero	Falso	Falso	Falso	No estoy seguro/a	Falso	Falso	Verdadero
Manta	Manta	18	Masculino	YACHAY	TIC	1-3	COVID-19	Creado en laboratorio	Una entidad capaz de adaptarse y evolucionar	1 - 10	Verdadero	Verdadero	Verdadero	Verdadero	Falso	No estoy seguro/a	Verdadero	Falso	Verdadero	Verdadero	Verdadero	Verdadero	Verdadero	Verdadero	Verdadero	No estoy seguro/a	No estoy seguro/a	Falso	Falso	Verdadero	Falso	Falso	Falso	Verdadero
Alamor	Alamor	24	Masculino	YACHAY	Tecnologías de la Información	9 en adelante	SARS-COV-2	De origen natural	Una entidad capaz de adaptarse y evolucionar	No estoy seguro/a	Falso	No estoy seguro/a	Verdadero	Verdadero	Falso	Falso	Verdadero	Falso	No estoy seguro/a	Verdadero	Verdadero	Verdadero	Verdadero	Verdadero	Falso	No estoy seguro/a	No estoy seguro/a	Falso	Falso	No estoy seguro/a	Falso	Falso	Falso	Verdadero	Quisiera saber los resultados del mismo.
Santo Domingo	La Concordia	22	Masculino	YACHAY	Biología	7-9	SARS-COV-2	De origen natural	Una entidad capaz de adaptarse y evolucionar	No estoy seguro/a	Falso	Verdadero	Verdadero	Verdadero	Falso	Falso	Verdadero	Falso	Verdadero	Verdadero	Verdadero	Verdadero	Verdadero	Verdadero	Falso	Verdadero	Verdadero	Falso	Falso	Falso	Verdadero	Falso	Falso	Verdadero
Ambato	Ambato	22	Masculino	YACHAY	Biomedicina	9 en adelante	SARS-COV-2	De origen natural	Una entidad capaz de adaptarse y evolucionar	1 - 10	Verdadero	Verdadero	Verdadero	Verdadero	No estoy seguro/a	Falso	Verdadero	Falso	Verdadero	Verdadero	Verdadero	Verdadero	Verdadero	Verdadero	Falso	Verdadero	Verdadero	Falso	Falso	Falso	Verdadero	Falso	Falso	Verdadero
San Miguel de Los Bancos	Quito	19	Femenino	YACHAY	Nanotecnología	1-3	MERS-19	Creado en laboratorio	Una entidad capaz de adaptarse y evolucionar	51 - 100	Verdadero	Verdadero	Verdadero	Verdadero	Falso	Falso	Verdadero	Verdadero	Verdadero	Verdadero	Verdadero	Verdadero	Verdadero	Verdadero	Falso	Verdadero	Verdadero	Falso	Falso	Falso	Verdadero	Falso	Falso	Verdadero
Quito	Quito	21	Femenino	YACHAY	Ingeniería biomedica	4-6	SARS-COV-2	Creado en laboratorio	Una entidad capaz de adaptarse y evolucionar	No estoy seguro/a	No estoy seguro/a	Verdadero	Verdadero	Verdadero	Falso	Falso	Verdadero	Falso	Verdadero	Verdadero	Verdadero	Verdadero	Verdadero	Verdadero	Falso	Verdadero	Verdadero	Falso	Falso	No estoy seguro/a	Verdadero	Falso	Falso	Verdadero
Guayaquil	Guayaquil	21	Femenino	YACHAY	Quimica	4-6	COVID-19	No estoy seguro/a	Una entidad capaz de adaptarse y evolucionar	1 - 10	Verdadero	Verdadero	Verdadero	Verdadero	Falso	Falso	Verdadero	Verdadero	Verdadero	Verdadero	Verdadero	Verdadero	Verdadero	Verdadero	No estoy seguro/a	No estoy seguro/a	No estoy seguro/a	Falso	Falso	Verdadero	Verdadero	Falso	Falso	Verdadero
Manta	Manta	18	Masculino	YACHAY	Biomedicina	1-3	SARS-COV-2	Creado en laboratorio	Una entidad capaz de adaptarse y evolucionar	21 - 30	No estoy seguro/a	No estoy seguro/a	Verdadero	Verdadero	No estoy seguro/a	Falso	No estoy seguro/a	No estoy seguro/a	Verdadero	Verdadero	Verdadero	Verdadero	Verdadero	Verdadero	No estoy seguro/a	No estoy seguro/a	Verdadero	Falso	No estoy seguro/a	No estoy seguro/a	Verdadero	Falso	No estoy seguro/a	Verdadero
guayaquil	guayaquil	22	Femenino	YACHAY	biomedicina	1-3	SARS-COV-2	De origen natural	Una entidad capaz de adaptarse y evolucionar	No estoy seguro/a	Verdadero	Verdadero	Verdadero	Verdadero	Falso	Falso	Verdadero	Verdadero	Verdadero	Verdadero	Verdadero	Verdadero	Verdadero	Verdadero	No estoy seguro/a	No estoy seguro/a	Verdadero	Falso	Falso	Falso	Verdadero	Falso	Falso	Verdadero
Cuenca	Cuenca	25	Masculino	YACHAY	Ingeniería Química	4-6	SARS-COV-2	De origen natural	Una entidad capaz de adaptarse y evolucionar	11 - 20	Verdadero	Falso	Verdadero	Verdadero	Falso	Falso	Verdadero	Verdadero	Verdadero	Verdadero	Verdadero	Verdadero	Verdadero	Verdadero	Falso	Verdadero	Verdadero	Falso	Falso	Falso	Verdadero	Falso	Falso	Verdadero	Buena Encuesta
Yachay	Quito	23	Masculino	YACHAY	Matemáticas	9 en adelante	SARS-COV-2	De origen natural	Una entidad capaz de adaptarse y evolucionar	1 - 10	Verdadero	Verdadero	Verdadero	Verdadero	No estoy seguro/a	Falso	Verdadero	Falso	Verdadero	Verdadero	Verdadero	Verdadero	Verdadero	Verdadero	No estoy seguro/a	Verdadero	Verdadero	Falso	Falso	Falso	No estoy seguro/a	Falso	Falso	Verdadero
Tulcan	Tulcán	23	Femenino	YACHAY	Biologia	9 en adelante	SARS-COV-2	De origen natural	Una entidad capaz de adaptarse y evolucionar	21 - 30	Falso	Verdadero	Verdadero	Verdadero	Verdadero	Falso	Verdadero	Falso	Verdadero	Verdadero	Verdadero	Verdadero	Verdadero	Verdadero	Falso	Verdadero	Verdadero	Falso	Falso	Falso	Verdadero	Falso	Falso	Verdadero
Gualaceo, Azuay	Gualaceo, Azuay	24	Femenino	YACHAY	Biología	9 en adelante	SARS-COV-2	De origen natural	Una entidad capaz de adaptarse y evolucionar	1 - 10	Verdadero	Verdadero	Verdadero	Verdadero	Verdadero	Falso	Verdadero	Verdadero	Verdadero	Verdadero	Verdadero	Verdadero	Verdadero	Verdadero	Falso	Verdadero	Verdadero	Falso	Falso	No estoy seguro/a	Verdadero	Falso	Falso	Verdadero
Cuenca	Guayaquil	23	Masculino	YACHAY	Nanotecnología	1-3	SARS-COV-2	De origen natural	Una entidad capaz de adaptarse y evolucionar	No estoy seguro/a	Falso	Verdadero	Verdadero	Verdadero	Falso	Falso	Verdadero	Falso	Verdadero	Verdadero	Verdadero	Verdadero	Verdadero	Verdadero	No estoy seguro/a	Verdadero	No estoy seguro/a	Falso	Falso	Verdadero	No estoy seguro/a	Falso	Falso	Verdadero
Urcuqui	Guayaquil	20	Masculino	YACHAY	BIOMEDICINA	4-6	No estoy seguro/a	De origen natural	Una entidad capaz de adaptarse y evolucionar	No estoy seguro/a	Verdadero	No estoy seguro/a	Verdadero	Verdadero	Falso	Falso	Verdadero	Falso	Verdadero	Verdadero	Verdadero	Verdadero	Verdadero	Verdadero	Falso	Verdadero	Verdadero	Falso	Falso	Falso	Falso	Falso	Falso	Verdadero
Quito	Quito	19	Masculino	YACHAY	Química	1-3	SARS-COV-2	No estoy seguro/a	Una entidad capaz de adaptarse y evolucionar	1 - 10	No estoy seguro/a	Verdadero	Verdadero	Verdadero	Falso	Falso	Verdadero	Falso	Verdadero	Verdadero	Verdadero	Verdadero	Verdadero	Verdadero	No estoy seguro/a	No estoy seguro/a	No estoy seguro/a	Falso	Falso	Verdadero	No estoy seguro/a	Falso	Falso	Verdadero
Quito	Quito	49	Femenino	UCE	Educacion	7-9	SARS-COV-2	Creado en laboratorio	No estoy seguro/a	No estoy seguro/a	Falso	Verdadero	Verdadero	Verdadero	Falso	Falso	Verdadero	Verdadero	Verdadero	Verdadero	Verdadero	Verdadero	Verdadero	Verdadero	Verdadero	Falso	Verdadero	Falso	verdadero	Verdadero	Verdadero	Falso	Falso	Verdadero
Cuenca	Cuenca	25	Masculino	YACHAY	Ciencias Computacionales	9 en adelante	SARS-COV-2	De origen natural	Un compuesto químico	No estoy seguro/a	Verdadero	Verdadero	Verdadero	Verdadero	Falso	No estoy seguro/a	Verdadero	No estoy seguro/a	Verdadero	Verdadero	Verdadero	Verdadero	Verdadero	Verdadero	No estoy seguro/a	Verdadero	Verdadero	Falso	Falso	Verdadero	Verdadero	verdadero	Falso	Verdadero
Guayaquil	Guayaquil	20	Femenino	YACHAY	Química	1-3	SARS-COV-2	Creado en laboratorio	Un compuesto químico	1 - 10	Verdadero	Verdadero	Verdadero	Verdadero	Falso	Falso	Verdadero	Falso	Verdadero	Verdadero	Verdadero	Verdadero	Verdadero	Verdadero	Falso	Falso	Verdadero	Falso	Falso	Verdadero	Verdadero	Falso	Falso	Verdadero
IBARRA	IBARRA	20	Masculino	YACHAY	IT	4-6	SARS-COV-2	De origen natural	Una entidad capaz de adaptarse y evolucionar	1 - 10	Falso	Verdadero	Verdadero	Verdadero	Falso	Falso	Verdadero	Falso	Verdadero	Verdadero	Verdadero	Verdadero	Verdadero	Verdadero	Falso	Verdadero	Verdadero	Falso	Falso	Falso	Verdadero	Falso	Falso	Verdadero
Riobamba	Riobamba	23	Femenino	YACHAY	Química	7-9	SARS-COV-2	De origen natural	Una entidad capaz de adaptarse y evolucionar	No estoy seguro/a	No estoy seguro/a	Verdadero	Verdadero	Verdadero	Falso	Falso	Verdadero	Falso	Verdadero	Verdadero	Verdadero	Verdadero	Verdadero	Verdadero	Falso	Falso	Verdadero	Falso	Falso	Falso	Verdadero	Falso	Falso	Verdadero
otavalo	Otavalo	21	Femenino	YACHAY	Biología	4-6	SARS-COV-2	De origen natural	Una entidad capaz de adaptarse y evolucionar	1 - 10	Verdadero	Verdadero	Verdadero	Verdadero	No estoy seguro/a	Falso	Verdadero	No estoy seguro/a	Verdadero	Verdadero	Verdadero	Verdadero	Verdadero	Verdadero	Falso	Verdadero	Verdadero	Falso	Falso	No estoy seguro/a	Verdadero	Falso	Falso	Verdadero
Loja	Loja	20	Femenino	YACHAY	Física	1-3	SARS-COV-2	De origen natural	Una entidad capaz de adaptarse y evolucionar	11 - 20	Falso	Verdadero	Verdadero	Verdadero	Falso	Falso	Verdadero	Verdadero	Verdadero	Verdadero	Falso	Verdadero	Verdadero	Verdadero	No estoy seguro/a	No estoy seguro/a	Verdadero	Falso	Falso	Verdadero	Verdadero	Falso	Falso	Verdadero
Santo domingo	Santo Domingo	22	Femenino	YACHAY	Biología	9 en adelante	SARS-COV-2	De origen natural	Una entidad capaz de adaptarse y evolucionar	1 - 10	Verdadero	Verdadero	Verdadero	Verdadero	Falso	Falso	Verdadero	Falso	Verdadero	Verdadero	Verdadero	Verdadero	Verdadero	Verdadero	Falso	Verdadero	Verdadero	Falso	Falso	No estoy seguro/a	Verdadero	Falso	Falso	Verdadero
Bolívar	Ibarra	22	Masculino	YACHAY	Ingeniería en tecnologías de la información	7-9	SARS-COV-2	No estoy seguro/a	Una entidad capaz de adaptarse y evolucionar	1 - 10	No estoy seguro/a	Verdadero	Verdadero	Verdadero	Verdadero	Falso	Verdadero	No estoy seguro/a	Verdadero	Verdadero	Verdadero	Verdadero	Verdadero	Verdadero	No estoy seguro/a	No estoy seguro/a	No estoy seguro/a	No estoy seguro/a	Falso	Falso	No estoy seguro/a	Falso	Falso	Verdadero	Chévere el estudio. Vayan con todo para poder crear un país más científico y con un pilar de datos de acceso público. ¡Saludos y estaré esperando el futuro paper!
Otavalo	Quito	18	Femenino	Nivelación Universidad Yachay Tech	Nivelación	1-3	SARS-COV-2	Creado en laboratorio	Una entidad capaz de adaptarse y evolucionar	1 - 10	Verdadero	Verdadero	Verdadero	Verdadero	Falso	Falso	Verdadero	Falso	Verdadero	Verdadero	Verdadero	Verdadero	Verdadero	Verdadero	Falso	Verdadero	Falso	Falso	Falso	Verdadero	Verdadero	Falso	Falso	Verdadero	Mi recomendación es que se debe tomar más conciencia frente a la situación que vivimos, para evitar así de que una u otra manera este virus se siga propagando más,además se debe tomar en cuenta que así se cambien los semáforos en las diferentes ciudades del país no podemos tomar a la ligera esta enfermedad y salir a las calles, si no más bien tratar de evitar todo tipo de aglomeraciones, acercami…
Quito	Ibarra	22	Masculino	YACHAY	Quimica	7-9	SARS-COV-2	De origen natural	Una entidad capaz de adaptarse y evolucionar	No estoy seguro/a	No estoy seguro/a	Verdadero	No estoy seguro/a	Verdadero	Verdadero	Falso	Verdadero	Verdadero	Verdadero	Verdadero	Verdadero	Verdadero	Verdadero	Verdadero	No estoy seguro/a	Verdadero	Verdadero	Falso	Falso	No estoy seguro/a	Verdadero	verdadero	Falso	Verdadero
Quito	Manta	22	Femenino	YACHAY	Biomedicina	1-3	SARS-COV-2	De origen natural	Una entidad capaz de adaptarse y evolucionar	1 - 10	Verdadero	Verdadero	Verdadero	Verdadero	Verdadero	Falso	Verdadero	Verdadero	Verdadero	Verdadero	Verdadero	Verdadero	Verdadero	Verdadero	Falso	No estoy seguro/a	Verdadero	Falso	Falso	Falso	Verdadero	Falso	Falso	Verdadero
COTACACHI	COTACACHI	21	Femenino	YACHAY	NANOTECNOLOGIA	1-3	No estoy seguro/a	De origen natural	Una entidad capaz de adaptarse y evolucionar	11 - 20	Verdadero	Verdadero	Verdadero	Verdadero	Falso	Falso	Falso	Verdadero	Verdadero	Verdadero	Verdadero	Verdadero	Verdadero	Verdadero	No estoy seguro/a	No estoy seguro/a	Verdadero	Verdadero	Falso	Verdadero	Falso	Falso	Falso	Verdadero
Guano	Riobamba	24	Femenino	YACHAY	Biomedicina	9 en adelante	SARS-COV-2	De origen natural	Una entidad capaz de adaptarse y evolucionar	31 - 40	No estoy seguro/a	Verdadero	No estoy seguro/a	Verdadero	No estoy seguro/a	Falso	Verdadero	Verdadero	Verdadero	Verdadero	Verdadero	Verdadero	Verdadero	Verdadero	No estoy seguro/a	Verdadero	Verdadero	Falso	Falso	No estoy seguro/a	No estoy seguro/a	No estoy seguro/a	Falso	Verdadero	¡Éxitos en el estudio!, seguro salen un montón de buenas propuestas. Sería interesante que pudieran compartir recursos respecto a la información presentada en la encuesta. ¡Saludos!
Machala	Machala	18	Masculino	YACHAY	Nanotecnologia	1-3	SARS-COV-2	De origen natural	Una entidad capaz de adaptarse y evolucionar	1 - 10	Verdadero	Verdadero	Verdadero	Verdadero	Falso	Falso	Verdadero	Falso	Verdadero	Verdadero	Verdadero	Verdadero	Verdadero	Verdadero	Falso	No estoy seguro/a	Verdadero	Falso	Falso	No estoy seguro/a	Verdadero	Falso	Falso	Verdadero
Urcuquí	Portoviejo	22	Femenino	YACHAY	Química	9 en adelante	SARS-COV-2	De origen natural	Una entidad capaz de adaptarse y evolucionar	1 - 10	No estoy seguro/a	Verdadero	Verdadero	Verdadero	Falso	Falso	Verdadero	Falso	Verdadero	Verdadero	Falso	Verdadero	Falso	Verdadero	No estoy seguro/a	No estoy seguro/a	Verdadero	Falso	Falso	Falso	No estoy seguro/a	verdadero	Falso	Verdadero
Quito	Quito	23	Femenino	YACHAY	Biología	9 en adelante	SARS-COV-2	De origen natural	Una entidad capaz de adaptarse y evolucionar	1 - 10	Verdadero	Verdadero	Verdadero	Verdadero	Verdadero	Falso	Verdadero	No estoy seguro/a	Verdadero	Verdadero	Verdadero	Verdadero	Verdadero	Verdadero	Falso	Verdadero	Verdadero	Falso	Falso	Verdadero	Verdadero	Falso	Falso	Verdadero
Manta	Manta	21	Masculino	YACHAY	Ingeniería en Biomedicina	4-6	SARS-COV-2	De origen natural	Una entidad capaz de adaptarse y evolucionar	No estoy seguro/a	Falso	Verdadero	Verdadero	Verdadero	Falso	Falso	Verdadero	Verdadero	Verdadero	Verdadero	Verdadero	Verdadero	Verdadero	Verdadero	Falso	Verdadero	Verdadero	Falso	Falso	Falso	Verdadero	Falso	Falso	Verdadero	La pregunta de la taza de mortalidad debería ser planteada de otra forma. Se debe tomar en cuenta que las cifras oficiales, no están ni cerca de respetar los modelados matemáticos epidemiológicos más precisos.
Santo Domingo	Santo Domingo	18	Masculino	YACHAY	Nanotecnologia	1-3	COVID-19	De origen natural	Una entidad capaz de adaptarse y evolucionar	1 - 10	Falso	Verdadero	Verdadero	Verdadero	Falso	Falso	Verdadero	No estoy seguro/a	Verdadero	Verdadero	Verdadero	Verdadero	No estoy seguro/a	Verdadero	Falso	Verdadero	Falso	No estoy seguro/a	Falso	No estoy seguro/a	Verdadero	No estoy seguro/a	Falso	Verdadero
Orellana	Orellana	18	Femenino	YACHAY	Quimica	1-3	SARS-COV-2	De origen natural	No estoy seguro/a	51 - 100	No estoy seguro/a	Verdadero	Verdadero	Verdadero	No estoy seguro/a	Falso	Verdadero	No estoy seguro/a	No estoy seguro/a	Verdadero	Verdadero	Verdadero	Verdadero	Verdadero	No estoy seguro/a	No estoy seguro/a	Verdadero	Falso	Falso	No estoy seguro/a	No estoy seguro/a	Falso	Falso	Verdadero
Quito	Riobamba	24	Femenino	YACHAY	Química	7-9	SARS-COV-2	De origen natural	Una entidad capaz de adaptarse y evolucionar	1 - 10	No estoy seguro/a	Verdadero	Verdadero	Verdadero	Verdadero	Falso	Verdadero	Falso	Verdadero	Verdadero	Verdadero	Verdadero	Verdadero	Verdadero	Falso	Falso	Verdadero	Falso	Falso	No estoy seguro/a	Verdadero	Falso	Verdadero	Verdadero
chone	chone	20	Femenino	YACHAY	nanotecnologia	1-3	SARS-COV-2	De origen natural	Una entidad capaz de adaptarse y evolucionar	No estoy seguro/a	No estoy seguro/a	Verdadero	Verdadero	Verdadero	No estoy seguro/a	Falso	Verdadero	Verdadero	No estoy seguro/a	Verdadero	Verdadero	Verdadero	Verdadero	Verdadero	Falso	Verdadero	Falso	Falso	Falso	No estoy seguro/a	Falso	Falso	Falso	Verdadero
Quito	Quito	23	Masculino	YACHAY	Biologia	4-6	COVID-19	No estoy seguro/a	Una entidad capaz de adaptarse y evolucionar	11 - 20	No estoy seguro/a	Verdadero	Verdadero	Verdadero	Falso	Falso	Verdadero	No estoy seguro/a	Verdadero	Verdadero	Verdadero	Verdadero	Verdadero	Verdadero	Falso	No estoy seguro/a	No estoy seguro/a	No estoy seguro/a	Falso	Falso	Verdadero	Falso	Falso	Verdadero
Quito	Quito	21	Femenino	UCE	Psicología industrial	4-6	SARS-COV-2	Creado en laboratorio	Una entidad capaz de adaptarse y evolucionar	11 - 20	Verdadero	Verdadero	Verdadero	Verdadero	Falso	Falso	Verdadero	Verdadero	Verdadero	Verdadero	Verdadero	Verdadero	Verdadero	Verdadero	No estoy seguro/a	Verdadero	Verdadero	Falso	Falso	No estoy seguro/a	Verdadero	No estoy seguro/a	Falso	Verdadero
Quito	Quito	19	Femenino	YACHAY	Biomedicina	4-6	COVID-19	No estoy seguro/a	Una entidad capaz de adaptarse y evolucionar	11 - 20	Verdadero	Verdadero	Verdadero	Verdadero	Verdadero	Falso	Verdadero	No estoy seguro/a	Verdadero	Verdadero	Verdadero	Verdadero	Verdadero	Verdadero	No estoy seguro/a	Verdadero	Verdadero	Falso	Falso	Verdadero	Verdadero	Falso	Falso	Verdadero
Quito	Quito	21	Femenino	UCE	Psicología industrial	4-6	SARS-COV-2	Creado en laboratorio	Una entidad capaz de adaptarse y evolucionar	11 - 20	Verdadero	Verdadero	Verdadero	Verdadero	Falso	Falso	Verdadero	Verdadero	Verdadero	Verdadero	Verdadero	Verdadero	Verdadero	Verdadero	No estoy seguro/a	Verdadero	Verdadero	Falso	Falso	No estoy seguro/a	Verdadero	No estoy seguro/a	Falso	Verdadero
Bolivar	Bolivar	18	Femenino	YACHAY	Matematica	1-3	COVID-19	Creado en laboratorio	Un complot mediático	31 - 40	No estoy seguro/a	Verdadero	Verdadero	Verdadero	Falso	Falso	Verdadero	Verdadero	Verdadero	Verdadero	Verdadero	Verdadero	Verdadero	Verdadero	Verdadero	No estoy seguro/a	No estoy seguro/a	No estoy seguro/a	verdadero	No estoy seguro/a	Verdadero	verdadero	Verdadero	Verdadero
IBARRA	IBARRA	24	Femenino	YACHAY	Química	9 en adelante	SARS-COV-2	Creado en laboratorio	Una entidad capaz de adaptarse y evolucionar	No estoy seguro/a	Verdadero	Verdadero	Verdadero	Verdadero	Falso	Falso	Verdadero	Falso	No estoy seguro/a	Verdadero	Verdadero	Verdadero	Verdadero	Verdadero	No estoy seguro/a	Verdadero	Verdadero	Falso	Falso	No estoy seguro/a	Verdadero	Falso	Falso	Verdadero
La Maná	La Maná	20	Masculino	YACHAY	Matemática	4-6	SARS-COV-2	De origen natural	Una entidad capaz de adaptarse y evolucionar	11 - 20	Verdadero	Verdadero	Verdadero	Verdadero	No estoy seguro/a	Verdadero	Verdadero	No estoy seguro/a	Verdadero	Verdadero	Verdadero	Verdadero	No estoy seguro/a	Verdadero	Falso	Falso	Verdadero	Falso	Falso	Falso	Verdadero	Falso	Falso	Verdadero	Me parecería muy importante realizar una encuesta a nivel nacional y así poder identificar las zonas con mayor desconocimiento sobre el virus, para realizar compañas virtuales de información y así promover la prevención del virus.
milagro	simon bolivar	23	Masculino	YACHAY	biomedicina	1-3	COVID-19	Creado en laboratorio	Una entidad capaz de adaptarse y evolucionar	1 - 10	Verdadero	Verdadero	Falso	Verdadero	Falso	Falso	Verdadero	Falso	Verdadero	Verdadero	Verdadero	Falso	Verdadero	Verdadero	No estoy seguro/a	Verdadero	Verdadero	Falso	verdadero	Verdadero	Verdadero	Falso	Falso	Verdadero	yo como apasionado de la biomedicina, me ha gustado toda mi vida estudiar el tratamiento y comportamiento de ciertas enfermedades y el COVID-19 no es la excepción, hice una exhaustiva investigacion de campo que me tomo mas de 3 semanas entender el comportamiento y procedencia del mismo virus, llegue a la conclusion que creando una infusion con plantas naturales nombradas a continuacion; hierbabue…
Portoviejo	Salinas	18	Masculino	YACHAY	Nivelación	1-3	SARS-COV-2	Creado en laboratorio	Una entidad capaz de adaptarse y evolucionar	1 - 10	Verdadero	Verdadero	Verdadero	Verdadero	Falso	Falso	Verdadero	Verdadero	Verdadero	Verdadero	Verdadero	Verdadero	Verdadero	Verdadero	Falso	Verdadero	Verdadero	Falso	No estoy seguro/a	Verdadero	Verdadero	Falso	Falso	Verdadero
Urcuqui	Cuenca	23	Masculino	YACHAY	IT	7-9	COVID-19	De origen natural	Una entidad capaz de adaptarse y evolucionar	1 - 10	No estoy seguro/a	Falso	Verdadero	Verdadero	Falso	Falso	Verdadero	Falso	Verdadero	Verdadero	Verdadero	Verdadero	Verdadero	Verdadero	No estoy seguro/a	No estoy seguro/a	Verdadero	Falso	Falso	Falso	Verdadero	Falso	Falso	Verdadero
Cuenca	Cuenca	24	Masculino	YACHAY	Ingeniería biomédica	9 en adelante	SARS-COV-2	De origen natural	Una entidad capaz de adaptarse y evolucionar	1 - 10	Verdadero	Verdadero	Verdadero	Verdadero	Falso	Falso	Verdadero	Falso	Verdadero	Verdadero	Verdadero	Verdadero	Verdadero	Verdadero	Falso	Verdadero	Verdadero	Falso	Falso	Falso	Verdadero	Falso	Falso	Verdadero
Quito	Quito	24	Masculino	UCE	Artes musicales	1-3	SARS-COV-2	De origen natural	Una entidad capaz de adaptarse y evolucionar	No estoy seguro/a	Verdadero	Verdadero	Verdadero	Verdadero	Falso	Falso	Verdadero	Falso	Verdadero	Verdadero	Verdadero	Verdadero	Verdadero	Verdadero	No estoy seguro/a	No estoy seguro/a	No estoy seguro/a	Falso	Falso	No estoy seguro/a	Verdadero	Falso	Falso	Verdadero
huaquillas	machala	20	Masculino	YACHAY	geologia	1-3	SARS-COV-2	De origen natural	Una entidad capaz de adaptarse y evolucionar	11 - 20	No estoy seguro/a	Verdadero	Verdadero	Verdadero	No estoy seguro/a	Falso	Verdadero	No estoy seguro/a	Verdadero	Verdadero	Verdadero	Verdadero	Verdadero	Verdadero	Falso	No estoy seguro/a	No estoy seguro/a	No estoy seguro/a	Falso	No estoy seguro/a	Verdadero	Falso	Falso	Verdadero
Yachay	Guayaquil	22	Masculino	YACHAY	Fisica	4-6	SARS-COV-2	De origen natural	Una entidad capaz de adaptarse y evolucionar	11 - 20	Verdadero	Verdadero	Verdadero	Verdadero	Falso	Falso	Verdadero	Verdadero	Verdadero	Verdadero	Verdadero	Verdadero	Verdadero	Verdadero	Falso	Verdadero	Verdadero	Falso	Falso	Verdadero	Verdadero	Falso	Falso	Verdadero
Quito	Puyo	24	Masculino	YACHAY	Física	1-3	COVID-19	De origen natural	Una entidad capaz de adaptarse y evolucionar	No estoy seguro/a	No estoy seguro/a	Verdadero	Verdadero	Verdadero	No estoy seguro/a	Falso	Verdadero	No estoy seguro/a	Verdadero	Verdadero	Verdadero	Verdadero	No estoy seguro/a	Verdadero	No estoy seguro/a	No estoy seguro/a	Verdadero	Falso	Falso	No estoy seguro/a	No estoy seguro/a	Falso	Falso	Verdadero
Otavalo	Otavalo	19	Masculino	UTN	Administración de Empresas	1-3	No estoy seguro/a	Creado en laboratorio	Una entidad capaz de adaptarse y evolucionar	11 - 20	Verdadero	Verdadero	Verdadero	Verdadero	Falso	No estoy seguro/a	No estoy seguro/a	No estoy seguro/a	Verdadero	Verdadero	Verdadero	Verdadero	Verdadero	Verdadero	Falso	Verdadero	No estoy seguro/a	Verdadero	No estoy seguro/a	No estoy seguro/a	Verdadero	Falso	No estoy seguro/a	Verdadero
Tulcán	Tulcán	24	Masculino	UTN	Administración de Empresas	9 en adelante	COVID-19	Creado en laboratorio	Un compuesto químico	No estoy seguro/a	Verdadero	Verdadero	No estoy seguro/a	Verdadero	Falso	Falso	Verdadero	Verdadero	Verdadero	Verdadero	Verdadero	Falso	Falso	Falso	Falso	No estoy seguro/a	Verdadero	Falso	Falso	Verdadero	Falso	Falso	Falso	Verdadero
Antonio Ante	Antonio Ante	23	Masculino	UTN	Administración de Empresas	7-9	SARS-COV-2	De origen natural	Una entidad capaz de adaptarse y evolucionar	11 - 20	Verdadero	Verdadero	Verdadero	Verdadero	Falso	Falso	Verdadero	No estoy seguro/a	Verdadero	Verdadero	Verdadero	Verdadero	Verdadero	Verdadero	Falso	Verdadero	No estoy seguro/a	Falso	No estoy seguro/a	Falso	Verdadero	Falso	Falso	Verdadero
El Ángel	Ibarra	22	Femenino	UTN	Contabilidad y Auditoría	9 en adelante	SARS-COV-2	De origen natural	Un complot mediático	1 - 10	No estoy seguro/a	Verdadero	Verdadero	Verdadero	Falso	Falso	Verdadero	Falso	Verdadero	Verdadero	Verdadero	Verdadero	Verdadero	Verdadero	No estoy seguro/a	No estoy seguro/a	No estoy seguro/a	Falso	Falso	Verdadero	Verdadero	Falso	Falso	Verdadero
Ibarra	Ibarra	23	Masculino	UTN	Contabilidad y auditoría	9 en adelante	SARS-COV-2	Creado en laboratorio	No estoy seguro/a	31 - 40	Verdadero	Verdadero	Verdadero	Verdadero	Falso	Falso	Verdadero	Verdadero	Verdadero	Verdadero	Verdadero	Verdadero	Verdadero	Verdadero	Falso	Verdadero	Verdadero	Falso	Falso	Verdadero	Falso	Falso	Falso	Verdadero
Ibarra	Ibarra	24	Masculino	UTN	Administración de Empresas	4-6	SARS-COV-2	De origen natural	Una entidad capaz de adaptarse y evolucionar	11 - 20	No estoy seguro/a	Verdadero	Verdadero	Verdadero	Verdadero	No estoy seguro/a	Verdadero	No estoy seguro/a	Verdadero	Verdadero	Verdadero	Verdadero	Verdadero	Verdadero	No estoy seguro/a	No estoy seguro/a	Verdadero	No estoy seguro/a	No estoy seguro/a	No estoy seguro/a	No estoy seguro/a	Falso	Falso	Verdadero	Ninguna recomendación gracias
San Pablo	San Pablo	28	Femenino	UTN	Ingeniería comercial	9 en adelante	SARS-COV-2	De origen natural	Una entidad capaz de adaptarse y evolucionar	1 - 10	Verdadero	Verdadero	Verdadero	Verdadero	Falso	Verdadero	Verdadero	Falso	Verdadero	Verdadero	Verdadero	Verdadero	Verdadero	Verdadero	No estoy seguro/a	Falso	Verdadero	Falso	Falso	Verdadero	Verdadero	Falso	Falso	Verdadero
Ibarra	Ibarra	22	Femenino	UTN	Contabilidad y Auditoría	7-9	SARS-COV-2	De origen natural	Una entidad capaz de adaptarse y evolucionar	1 - 10	Verdadero	Verdadero	Verdadero	Verdadero	Verdadero	Falso	Verdadero	Verdadero	Verdadero	Verdadero	Verdadero	Verdadero	Verdadero	Verdadero	Verdadero	No estoy seguro/a	Verdadero	Falso	Falso	Verdadero	Verdadero	Falso	Falso	Verdadero
Ibarra	Ibarra	23	Femenino	UTN	Ingenieria en Contabilidad y Auditoría CPA	9 en adelante	SARS-COV-2	Creado en laboratorio	Un complot mediático	1 - 10	Verdadero	Verdadero	Verdadero	Verdadero	Falso	Falso	Verdadero	Falso	Verdadero	Verdadero	Verdadero	Verdadero	Verdadero	Verdadero	Verdadero	Verdadero	Verdadero	Falso	Falso	Verdadero	Verdadero	Falso	Falso	Verdadero
Mira	Mira	21	Masculino	UTN	administración de empresas	7-9	SARS-COV-2	Creado en laboratorio	No estoy seguro/a	1 - 10	Verdadero	Verdadero	Verdadero	Verdadero	No estoy seguro/a	Falso	Verdadero	Falso	Verdadero	Verdadero	Verdadero	Verdadero	Verdadero	Verdadero	Falso	No estoy seguro/a	Verdadero	Falso	Falso	Verdadero	No estoy seguro/a	Falso	Falso	Verdadero
ibarra	Ibarra	23	Femenino	UTN	Contabilidad y auditoria	7-9	No estoy seguro/a	De origen natural	Una entidad capaz de adaptarse y evolucionar	31 - 40	Verdadero	Verdadero	Verdadero	Verdadero	No estoy seguro/a	Falso	No estoy seguro/a	No estoy seguro/a	Verdadero	Verdadero	Verdadero	Verdadero	Verdadero	Verdadero	No estoy seguro/a	No estoy seguro/a	No estoy seguro/a	Falso	Falso	Falso	Falso	Falso	Verdadero	Verdadero	la utn debería hacer todo por medios digitales porque si acudimos a aulas a rendir evaluaciones nos vamos a contagiar existen alumnos de todo lado y no se sabe el grado de responsabilidad deberia adaptarse a igual que otras universidades toda evaluaciones virtuales y poder ir concluyendo las materias porque todo esto de ir de manera presencial genera estrés y demasiada preocupación
Otavalo	Otavalo	20	Femenino	UTN	Administración de empresas	1-3	COVID-19	Creado en laboratorio	Una entidad capaz de adaptarse y evolucionar	1 - 10	No estoy seguro/a	Verdadero	Verdadero	Verdadero	Falso	Falso	Verdadero	Falso	Verdadero	Verdadero	Verdadero	Verdadero	Verdadero	Verdadero	Verdadero	No estoy seguro/a	Verdadero	Falso	Falso	No estoy seguro/a	Verdadero	Falso	Falso	Verdadero
Ibarra	Ibarra	24	Masculino	UTN	Administración de empresas	7-9	SARS-COV-2	No estoy seguro/a	Una entidad capaz de adaptarse y evolucionar	21 - 30	No estoy seguro/a	Verdadero	Verdadero	Verdadero	No estoy seguro/a	Falso	Verdadero	No estoy seguro/a	Verdadero	Verdadero	Verdadero	Verdadero	Verdadero	Verdadero	Falso	Verdadero	Verdadero	Falso	Falso	Falso	No estoy seguro/a	Falso	Falso	Verdadero	No abrir las universidades en manera presencial, tengo compañeros que están con el virus.
Ibarra	Ibarra	24	Femenino	UTN	Administración de empresas	1-3	SARS-COV-2	De origen natural	Una entidad capaz de adaptarse y evolucionar	11 - 20	Verdadero	Verdadero	Verdadero	Verdadero	Falso	Falso	Verdadero	Falso	Verdadero	Verdadero	Verdadero	Verdadero	Verdadero	Verdadero	Falso	Verdadero	Verdadero	Falso	No estoy seguro/a	No estoy seguro/a	Verdadero	Falso	Falso	Verdadero
Atuntaquí	Ibarra	21	Femenino	UTN	Contabilidad y Auditoría	7-9	SARS-COV-2	De origen natural	Una entidad capaz de adaptarse y evolucionar	1 - 10	Verdadero	Verdadero	Verdadero	Verdadero	Falso	Falso	Verdadero	No estoy seguro/a	Verdadero	Verdadero	Verdadero	Verdadero	Verdadero	Verdadero	Falso	Verdadero	Verdadero	Falso	Falso	Verdadero	Verdadero	Falso	Falso	Verdadero	La pregunta sobre los perros y gatos no le encuentro clara
Ibarra	Ibarra	20	Femenino	UTN	Administración de Empresas	4-6	COVID-19	De origen natural	Una entidad capaz de adaptarse y evolucionar	41 - 50	Falso	Verdadero	Verdadero	Verdadero	Falso	Falso	Falso	Falso	Verdadero	Verdadero	Verdadero	Verdadero	Verdadero	Verdadero	Falso	Falso	Verdadero	Verdadero	verdadero	Verdadero	Falso	Falso	Verdadero	Verdadero
Ibarra	Ibarra	20	Masculino	UTN	Administracion de Empresas	1-3	COVID-19	Creado en laboratorio	Una entidad capaz de adaptarse y evolucionar	31 - 40	Verdadero	Verdadero	Verdadero	Verdadero	Verdadero	Verdadero	Verdadero	Falso	Verdadero	Verdadero	Verdadero	Verdadero	Verdadero	Verdadero	No estoy seguro/a	No estoy seguro/a	Verdadero	Falso	verdadero	Verdadero	Verdadero	verdadero	Verdadero	Verdadero	Informar de forma mas eficiente sobre la situacion que estamos pasando en estos momentos
Ibarra	Ibarra	24	Masculino	UTN	Administración de Empresas	9 en adelante	SARS-COV-2	No estoy seguro/a	Una entidad capaz de adaptarse y evolucionar	1 - 10	Verdadero	Verdadero	Verdadero	Verdadero	No estoy seguro/a	Falso	Verdadero	No estoy seguro/a	Verdadero	Verdadero	Verdadero	Verdadero	Verdadero	Verdadero	No estoy seguro/a	No estoy seguro/a	Verdadero	Falso	Falso	No estoy seguro/a	Verdadero	Falso	Falso	Verdadero
Ibarra	Ibarra	18	Femenino	UTN	Administración de Empresas	1-3	SARS-COV-2	Creado en laboratorio	Una entidad capaz de adaptarse y evolucionar	51 - 100	Verdadero	Verdadero	Verdadero	Verdadero	Falso	Falso	Verdadero	Verdadero	Verdadero	Verdadero	Verdadero	Verdadero	Verdadero	Verdadero	No estoy seguro/a	No estoy seguro/a	Verdadero	Falso	Falso	Verdadero	Verdadero	Falso	Falso	Verdadero
Tabacundo	Ipiales-Colombia	24	Femenino	UTN	Administración de empresas	7-9	SARS-COV-2	De origen natural	No estoy seguro/a	21 - 30	Verdadero	Verdadero	Verdadero	Verdadero	Falso	Falso	Verdadero	Verdadero	Falso	Verdadero	Verdadero	Verdadero	Verdadero	Verdadero	Falso	Falso	No estoy seguro/a	Verdadero	Falso	Verdadero	Falso	Falso	Falso	Verdadero	No salir de casa si no es necesario y ser prudente con la relación en medio de la sociedad
Antonio Ante	Otavalo	21	Masculino	UTN	Administración de empresas	1-3	SARS-COV-2	No estoy seguro/a	Una entidad capaz de adaptarse y evolucionar	1 - 10	Verdadero	Verdadero	Verdadero	Verdadero	Verdadero	Falso	Verdadero	Falso	Verdadero	Verdadero	Verdadero	Verdadero	Verdadero	Verdadero	Falso	Verdadero	Falso	Falso	verdadero	Verdadero	Verdadero	Falso	Falso	Verdadero
Ibarra	Ibarra	22	Femenino	UTN	Administración de Empresas	7-9	SARS-COV-2	Creado en laboratorio	Una entidad capaz de adaptarse y evolucionar	21 - 30	Verdadero	Verdadero	Verdadero	Verdadero	Falso	Falso	Verdadero	Verdadero	Verdadero	Verdadero	Verdadero	Verdadero	Verdadero	Verdadero	Verdadero	No estoy seguro/a	Verdadero	Falso	Falso	Verdadero	Verdadero	No estoy seguro/a	Falso	Verdadero
Atuntaqui	Atuntaqui	22	Masculino	UTN	Contabilidad y Auditoría	4-6	SARS-COV-2	De origen natural	Una entidad capaz de adaptarse y evolucionar	1 - 10	Falso	Verdadero	Verdadero	Verdadero	Falso	Falso	Verdadero	Verdadero	Verdadero	Verdadero	Verdadero	Verdadero	Verdadero	Verdadero	Falso	No estoy seguro/a	Verdadero	Falso	Falso	Verdadero	Verdadero	Falso	Falso	Verdadero
Ibarra	Ibarra	19	Femenino	UTN	Contabilidad y auditoría	1-3	No estoy seguro/a	Creado en laboratorio	Un complot mediático	1 - 10	Verdadero	Verdadero	Verdadero	Verdadero	Falso	Falso	Verdadero	No estoy seguro/a	Verdadero	Verdadero	Verdadero	Verdadero	Verdadero	Verdadero	No estoy seguro/a	No estoy seguro/a	Verdadero	Falso	No estoy seguro/a	Verdadero	No estoy seguro/a	Falso	Falso	Verdadero	Me parece bueno que realicen estas encuestas
[truncated: 2,878 more rows]
